# Supplementary material
Source: MDPI journal article supplement (https://www.mdpi.com/2077-1312/10/6/737)
Supplement: s1 [file s1]

Archive with 8 entries (8 files):
- Figure S.pdf
- Table S1.xlsx
- Table S2.pdf
- Table S3.xls
- Table S4.xlsx
- Table S5.xlsx
- Table S6.xlsx
- Table S7.xlsx
