# Supplementary material
Source: MDPI journal article supplement (https://www.mdpi.com/2077-1312/10/6/737)
Supplement: s1 [file s1 › Figure S.pdf]

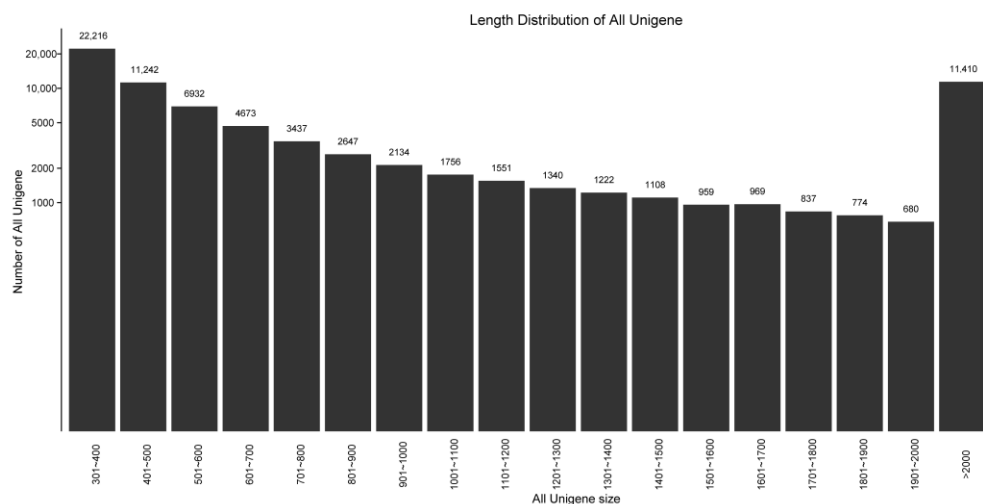

**Figure S1.** Length distribution of Unigenes of testis and ovarian transcriptome of *Macrobrachium rosenbergii*

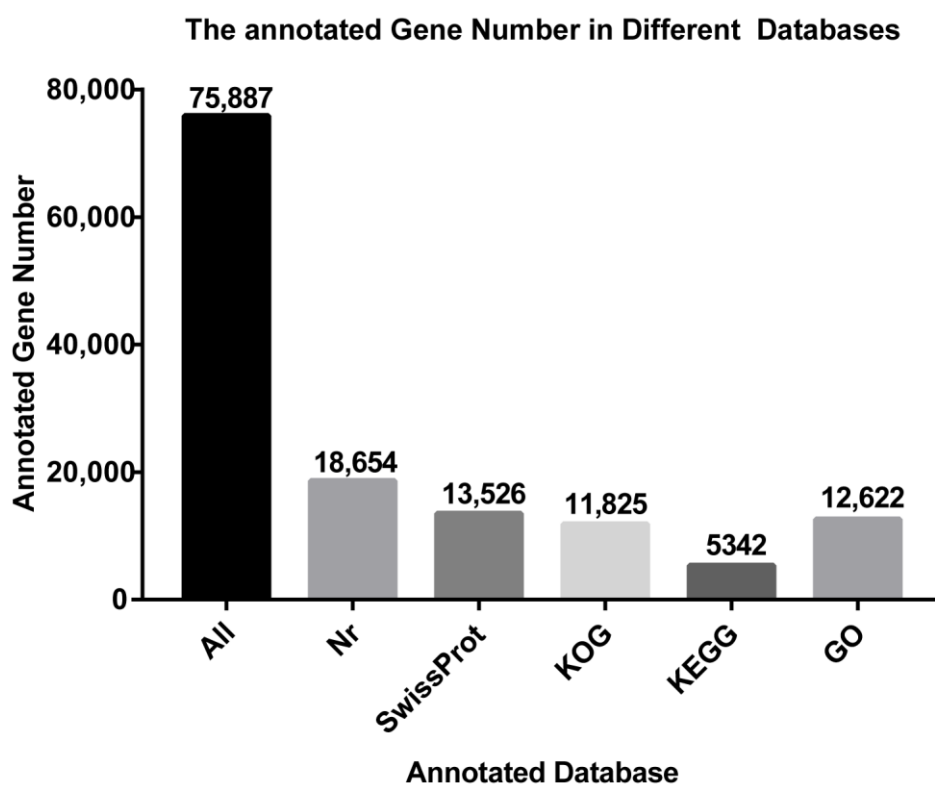

**Figure S2.** Number of unigenes annotated to different databases

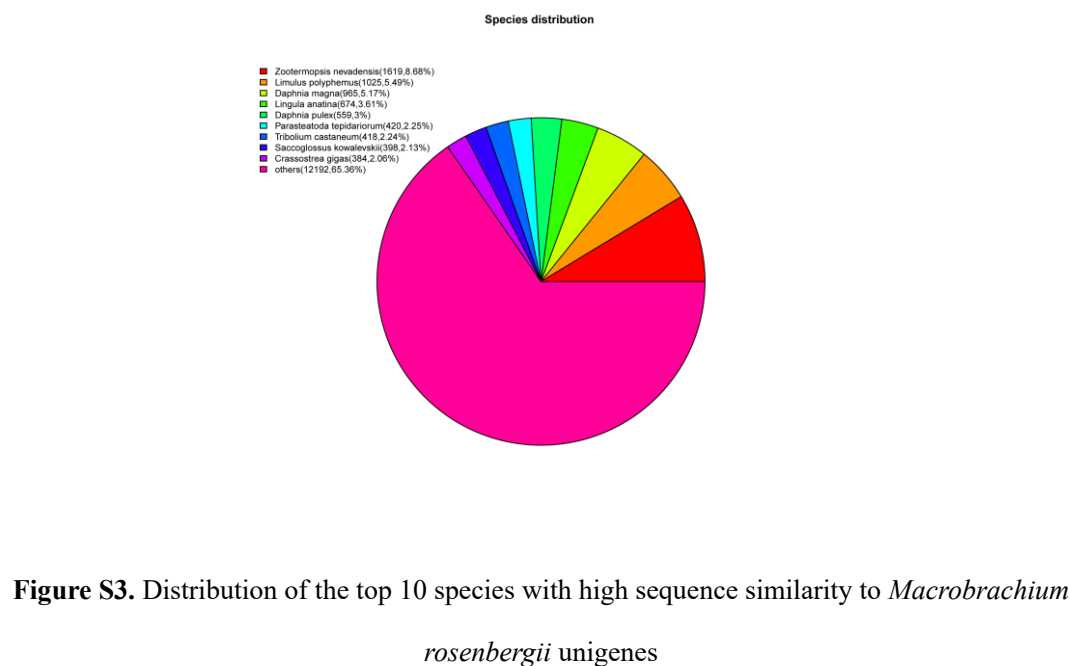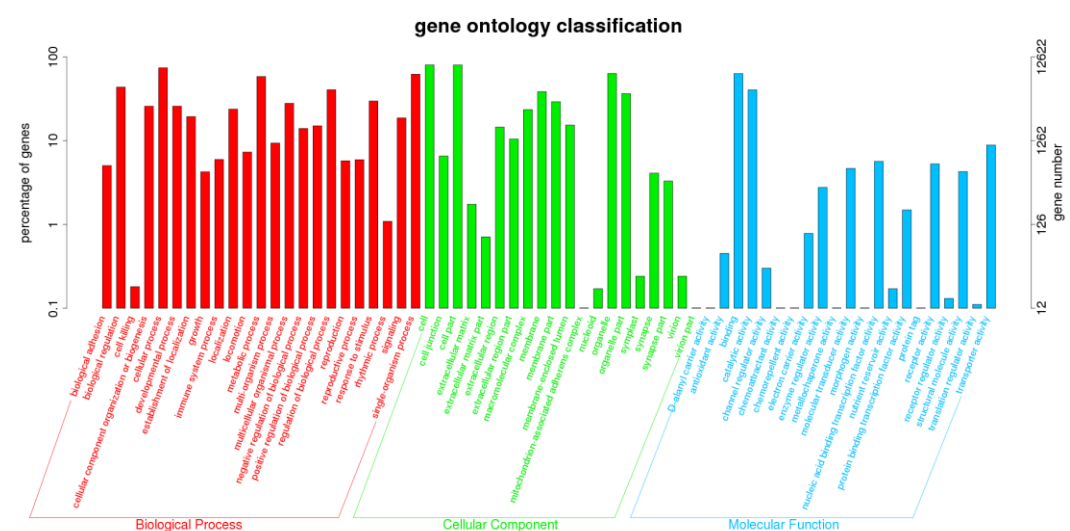

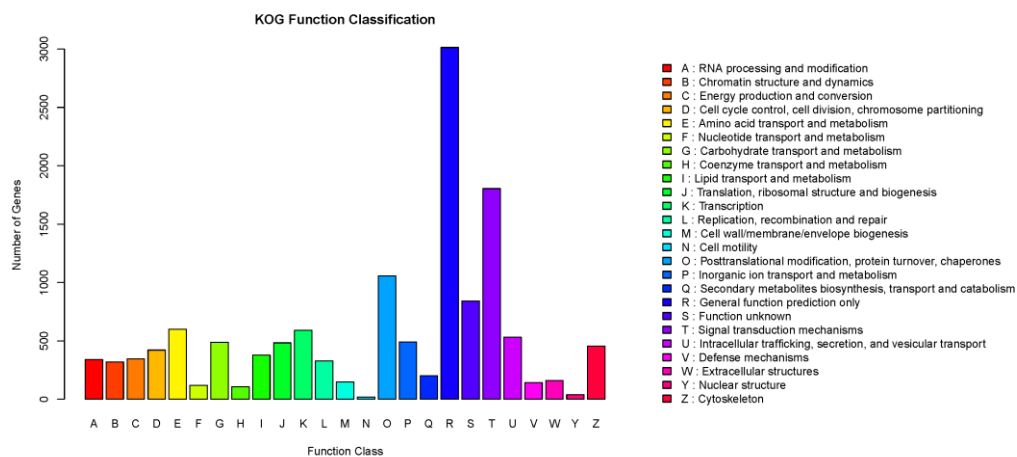

**Figure S5.** KOG annotation analysis of the unigenes
