# Supplementary material
Source: MDPI journal article supplement (https://www.mdpi.com/2077-1312/10/6/737)
Supplement: s1 [file s1 › Table S1.xlsx]

## Sheet: Sheet1
Table S1 Growth performance of the 10 samples
Sample ID	weight	length
females1	8.01	5.9
females2	8.35	6.2
females3	9.45	6.5
females4	9.01	6.3
females5	8.73	6.2
males1	14.13	7.1
males2	13.87	7.2
males3	12.67	6.8
males4	14.34	7.3
males5	14.68	7.4
