# Supplementary material
Source: MDPI journal article supplement (https://www.mdpi.com/2077-1312/10/6/737)
Supplement: s1 [file s1 › Table S2.pdf]

**Table S2.** Sequences of primers used in this study.

| Gene name      | Gene ID             | Sequence (5'-3')                                          | Product Size<br>(bp) |
|----------------|---------------------|-----------------------------------------------------------|----------------------|
| <i>Mrr</i>     | comp106877_c0_seq1  | F: ATCTGAAGATGATTCGGTCGAGG<br>R: TAGGTTCTGAAATCTCGACACG   | 218                  |
| <i>MRPINK</i>  | comp124889_c0_seq1  | F: GATCGTGAGTGTAAGTGCCTTG<br>R: GACACCATCCAGAGATCAGGATC   | 290                  |
| <i>IR</i>      | comp132702_c0_seq3  | F: AAAGTACACGGTGGTAGACTAC<br>R: TCACATCCTCCTTTTCCTGAAGG   | 288                  |
| <i>IAGBP</i>   | comp109312_c0_seq1  | F: GCTCGGTTTCGTCGCTTTAATT<br>R: ATGTGTACCTTCTGCACAAGT     | 215                  |
| <i>TESK1</i>   | comp111585_c0_seq1  | F: CAGATGTTCCCCCTCTACAGATG<br>R: GTTCTGTCTTTCCCTGAGCCTC   | 201                  |
| <i>dsx</i>     | comp109085_c0_seq1  | F: CCAATGGCTTCAAGGAGAGTACT<br>R: CTCCTATGAGTGTGGCATCTCTC  | 209                  |
| <i>ERR</i>     | comp126022_c0_seq1  | F: GTCGAGAGTTCCCATCATAGACC<br>R: GTGGAGAGAGATGATCATGTCCC  | 283                  |
| <i>Sxl3</i>    | comp126667_c0_seq1  | F: CCTCTTCCTCACGTCGAATAACA<br>R: TCCTGTTTCAGTTATCAGAGTGCC | 270                  |
| <i>cyclinB</i> | comp124361_c0_seq2  | F: TAAGAAATGTAAGCCGAGTCCCC<br>R: GATCGAAGGTAGATGGTGTCTCC  | 201                  |
| <i>Dmrt99B</i> | comp131814_c0_seq5  | F: CGACCACACGACGAATATTTTCAG<br>R: GAAATGGATCTTGTTCAGCAGGG | 213                  |
| <i>PPP2A</i>   | comp133303_c0_seq29 | F: CTGGACTCTGGTTCTGATGTCAA<br>R: GCCAGGAGAATTCGACACTTTC   | 203                  |
| <i>ADCY9</i>   | comp56259_c0_seq1   | F: ATTTAGTGGTCCAGTACAGCAGG<br>R: TCATCAGCAGTAGAAGCCGATAC  | 243                  |
