# Supplementary material
Source: MDPI journal article supplement (https://www.mdpi.com/2077-1312/10/6/737)
Supplement: s1 [file s1 › Table S3.xls]

## Sheet: Table S3
Pathway	Pathway_type	gene_list	gene_num
ko04340,Hedgehog signaling pathway	Environmental Information Processing\Signal transduction	comp39758_c0_seq1;comp51614_c0_seq1;comp91872_c0_seq1;comp91872_c1_seq1;comp126190_c0_seq4;comp135031_c1_seq4;comp122789_c0_seq11;comp91137_c1_seq2;comp113728_c0_seq2;comp125540_c0_seq1;comp94045_c0_seq1;comp146137_c0_seq1;comp109553_c0_seq1;comp96298_c0_seq2;comp108686_c1_seq2;comp148658_c0_seq1;comp115728_c0_seq1;comp127778_c0_seq1;comp139209_c0_seq1;comp4383_c0_seq1;comp36687_c0_seq1;comp10054…	44
ko04711,Circadian rhythm - fly	Organismal Systems\Environmental adaptation	comp125540_c0_seq1;comp129520_c1_seq11;comp38187_c0_seq1;comp142969_c0_seq1;comp116325_c0_seq1;comp95905_c0_seq1;comp113015_c0_seq1;comp132550_c2_seq2;comp94045_c0_seq1;comp146137_c0_seq1;	10
ko00564,Glycerophospholipid metabolism	Metabolism\Lipid metabolism	comp93989_c0_seq1;comp127155_c0_seq2;comp132127_c0_seq3;comp132127_c1_seq1;comp117574_c0_seq1;comp111149_c0_seq1;comp128011_c0_seq1;comp112193_c0_seq2;comp121975_c0_seq3;comp103371_c0_seq1;comp116947_c0_seq1;comp125364_c0_seq5;comp132285_c0_seq4;comp133634_c0_seq4;comp126243_c0_seq1;comp47559_c0_seq1;comp72131_c1_seq1;comp86431_c0_seq2;comp111907_c0_seq6;comp124251_c0_seq3;comp126956_c0_seq36;com…	86
ko00030,Pentose phosphate pathway	Metabolism\Carbohydrate metabolism	comp124475_c0_seq1;comp126064_c0_seq2;comp167382_c0_seq1;comp49014_c0_seq1;comp108794_c0_seq1;comp16169_c0_seq1;comp116923_c0_seq1;comp135332_c0_seq1;comp129158_c1_seq2;comp111871_c0_seq1;comp113396_c0_seq1;comp40818_c0_seq1;comp72000_c0_seq1;comp114492_c0_seq1;comp132490_c0_seq1;comp121212_c0_seq1;comp131365_c0_seq1;comp158676_c0_seq1;comp109700_c0_seq1;comp113764_c0_seq2;comp36671_c0_seq1;comp1…	33
ko04540,Gap junction	Cellular Processes\Cellular community - eukaryotes	comp117935_c0_seq2;comp128862_c0_seq4;comp128813_c0_seq3;comp110195_c0_seq1;comp129465_c1_seq1;comp129867_c1_seq13;comp115139_c0_seq4;comp98858_c0_seq1;comp98476_c0_seq1;comp133677_c1_seq142;comp13694_c0_seq1;comp25525_c0_seq1;comp39114_c0_seq1;comp39718_c0_seq1;comp67459_c0_seq1;comp71739_c0_seq1;comp76428_c0_seq1;comp85989_c0_seq1;comp101510_c0_seq1;comp102165_c1_seq1;comp103256_c0_seq3;comp106…	74
ko00680,Methane metabolism	Metabolism\Energy metabolism	comp78473_c0_seq1;comp107196_c0_seq2;comp110880_c0_seq1;comp124048_c0_seq2;comp126568_c0_seq1;comp128380_c0_seq2;comp120141_c0_seq1;comp120141_c1_seq1;comp120141_c2_seq1;comp139419_c0_seq1;comp134272_c0_seq1;comp40650_c0_seq1;comp90299_c0_seq1;comp91918_c0_seq1;comp98580_c0_seq1;comp126939_c0_seq1;comp94084_c0_seq1;comp108284_c0_seq4;comp118559_c0_seq1;comp119897_c0_seq1;comp119897_c1_seq1;comp13…	36
ko00270,Cysteine and methionine metabolism	Metabolism\Amino acid metabolism	comp124727_c0_seq2;comp125634_c0_seq1;comp109526_c0_seq1;comp123348_c0_seq1;comp124032_c0_seq2;comp98057_c0_seq1;comp103757_c0_seq1;comp99262_c0_seq1;comp110465_c0_seq1;comp127055_c0_seq1;comp127055_c1_seq2;comp115645_c0_seq2;comp132254_c0_seq1;comp130382_c0_seq2;comp115169_c0_seq1;comp132481_c0_seq1;comp117109_c0_seq2;comp128686_c1_seq1;comp123962_c0_seq1;comp116262_c0_seq1;comp116839_c0_seq4;co…	46
ko04976,Bile secretion	Organismal Systems\Digestive system	comp78582_c0_seq1;comp118168_c0_seq1;comp109836_c0_seq1;comp11098_c0_seq1;comp118878_c1_seq11;comp123711_c0_seq1;comp127278_c0_seq14;comp122128_c0_seq2;comp130375_c0_seq2;comp132661_c0_seq6;comp119179_c0_seq3;comp125202_c0_seq4;comp117171_c1_seq3;comp121757_c0_seq1;comp124835_c0_seq2;comp78875_c0_seq7;comp102019_c0_seq1;comp107556_c0_seq1;comp112206_c0_seq4;comp113972_c0_seq3;comp53062_c0_seq2;co…	40
ko00360,Phenylalanine metabolism	Metabolism\Amino acid metabolism	comp50343_c0_seq1;comp105463_c0_seq1;comp147747_c0_seq1;comp124634_c0_seq4;comp128218_c0_seq1;comp98132_c0_seq1;comp139152_c0_seq1;comp116839_c0_seq4;comp109487_c0_seq1;comp116559_c0_seq1;comp119750_c2_seq2;comp129665_c0_seq11;comp41762_c0_seq1;comp152709_c0_seq1;	14
ko05120,Epithelial cell signaling in Helicobacter pylori infection	Human Diseases\Infectious diseases	comp122380_c1_seq3;comp126462_c1_seq4;comp130197_c1_seq11;comp41409_c0_seq1;comp128215_c0_seq13;comp133977_c0_seq6;comp128862_c0_seq4;comp130003_c0_seq1;comp147708_c0_seq1;comp98476_c0_seq1;comp133677_c1_seq142;comp129531_c0_seq13;comp69733_c0_seq2;comp79138_c0_seq1;comp125510_c1_seq1;comp133044_c0_seq1;comp82174_c0_seq1;comp89742_c0_seq1;comp119876_c0_seq1;comp121954_c0_seq1;comp132738_c0_seq3;c…	52
ko00130,Ubiquinone and other terpenoid-quinone biosynthesis	Metabolism\Metabolism of cofactors and vitamins	comp116839_c0_seq4;comp118552_c0_seq1;comp109746_c0_seq2;comp114678_c0_seq1;comp141314_c0_seq1;comp113058_c0_seq1;comp114314_c0_seq1;comp128930_c0_seq2;comp116148_c0_seq4;comp109487_c0_seq1;comp116559_c0_seq1;	11
ko04014,Ras signaling pathway	Environmental Information Processing\Signal transduction	comp125464_c0_seq3;comp115461_c0_seq1;comp128862_c0_seq4;comp132679_c0_seq1;comp50097_c0_seq1;comp94590_c0_seq1;comp117192_c0_seq1;comp132702_c0_seq3;comp134550_c0_seq8;comp135037_c0_seq12;comp142807_c0_seq1;comp100088_c0_seq1;comp116083_c0_seq12;comp130035_c0_seq13;comp130354_c0_seq4;comp130815_c0_seq1;comp133410_c0_seq3;comp134655_c0_seq29;comp128813_c0_seq3;comp116119_c0_seq1;comp122380_c1_seq…	130
ko05010,Alzheimer's disease	Human Diseases\Neurodegenerative diseases	comp130003_c0_seq1;comp147708_c0_seq1;comp41409_c0_seq1;comp128215_c0_seq13;comp133977_c0_seq6;comp111637_c0_seq1;comp111637_c1_seq1;comp129644_c0_seq6;comp129644_c2_seq1;comp46251_c0_seq1;comp90932_c0_seq1;comp110416_c0_seq1;comp115481_c0_seq1;comp121598_c0_seq1;comp120531_c0_seq7;comp102184_c0_seq1;comp134063_c2_seq1;comp134407_c0_seq1;comp108062_c0_seq1;comp128330_c0_seq2;comp41161_c0_seq1;com…	200
ko00730,Thiamine metabolism	Metabolism\Metabolism of cofactors and vitamins	comp122623_c0_seq1;comp99644_c0_seq1;comp44574_c0_seq1;comp55712_c0_seq1;comp70887_c0_seq1;comp97310_c0_seq1;comp105820_c0_seq2;comp108190_c0_seq1;comp110823_c0_seq4;comp114841_c0_seq1;comp118035_c0_seq1;comp119957_c0_seq2;comp125430_c0_seq7;comp128625_c0_seq2;comp129544_c0_seq1;comp136914_c0_seq1;comp138102_c0_seq1;comp143579_c0_seq1;comp144905_c0_seq1;comp149614_c0_seq1;comp166615_c0_seq1;comp1…	26
ko05322,Systemic lupus erythematosus	Human Diseases\Immune diseases	comp115716_c0_seq1;comp119138_c0_seq1;comp127912_c1_seq1;comp132368_c0_seq1;comp136870_c0_seq1;comp77318_c0_seq1;comp97754_c0_seq1;comp53638_c0_seq1;comp92762_c0_seq1;comp100510_c0_seq1;comp113801_c0_seq1;comp128586_c1_seq1;comp105004_c0_seq1;comp122369_c0_seq1;comp32793_c0_seq1;comp124941_c0_seq13;comp137748_c0_seq1;comp138748_c0_seq1;comp152896_c0_seq1;comp126001_c0_seq2;comp122061_c0_seq1;comp…	22
ko04010,MAPK signaling pathway	Environmental Information Processing\Signal transduction	comp38328_c0_seq1;comp44342_c0_seq1;comp109217_c0_seq2;comp115735_c0_seq2;comp137249_c0_seq1;comp138265_c0_seq1;comp95885_c0_seq2;comp116931_c1_seq3;comp48649_c0_seq1;comp49866_c0_seq1;comp105193_c0_seq1;comp122789_c0_seq11;comp129704_c0_seq3;comp124663_c0_seq4;comp94305_c0_seq4;comp113748_c0_seq1;comp89708_c0_seq1;comp120562_c0_seq5;comp131417_c0_seq16;comp132016_c0_seq2;comp112013_c0_seq1;comp8…	131
ko04722,Neurotrophin signaling pathway	Organismal Systems\Nervous system	comp128813_c0_seq3;comp110195_c0_seq1;comp129465_c1_seq1;comp129867_c1_seq13;comp103042_c0_seq1;comp115139_c0_seq4;comp98858_c0_seq1;comp111132_c0_seq1;comp94697_c0_seq2;comp108518_c0_seq1;comp80362_c0_seq1;comp119992_c0_seq2;comp126791_c1_seq1;comp123460_c0_seq1;comp126201_c0_seq1;comp122689_c0_seq5;comp86066_c0_seq1;comp137349_c0_seq1;comp116098_c0_seq6;comp123732_c1_seq1;comp116119_c0_seq1;com…	71
ko05412,Arrhythmogenic right ventricular cardiomyopathy (ARVC)	Human Diseases\Cardiovascular diseases	comp88228_c0_seq1;comp114058_c0_seq3;comp116792_c0_seq1;comp122309_c1_seq16;comp125874_c0_seq1;comp130927_c1_seq2;comp152004_c0_seq1;comp123770_c0_seq3;comp127593_c0_seq1;comp129874_c0_seq19;comp42686_c0_seq1;comp47174_c0_seq1;comp49314_c0_seq2;comp49327_c0_seq2;comp51870_c0_seq1;comp64597_c0_seq2;comp65285_c0_seq1;comp79883_c0_seq1;comp80594_c0_seq1;comp80594_c1_seq1;comp83237_c0_seq1;comp85647_…	68
ko03450,Non-homologous end-joining	Genetic Information Processing\Replication and repair	comp132026_c0_seq1;comp121146_c3_seq1;comp123949_c0_seq1;comp133493_c0_seq4;comp130521_c0_seq2;comp125352_c0_seq19;comp128738_c3_seq1;comp134859_c0_seq3;comp123844_c0_seq1;comp121058_c0_seq10;comp134071_c0_seq2;	11
ko04972,Pancreatic secretion	Organismal Systems\Digestive system	comp115708_c0_seq24;comp133016_c0_seq4;comp93663_c0_seq1;comp110926_c0_seq1;comp121285_c0_seq3;comp116374_c0_seq9;comp131553_c0_seq1;comp129704_c0_seq3;comp108861_c0_seq3;comp132696_c0_seq1;comp118167_c0_seq3;comp86066_c0_seq1;comp137349_c0_seq1;comp112176_c0_seq1;comp116613_c0_seq1;comp69733_c0_seq2;comp79138_c0_seq1;comp125510_c1_seq1;comp133044_c0_seq1;comp51447_c0_seq1;comp67738_c0_seq1;comp9…	107
ko04721,Synaptic vesicle cycle	Organismal Systems\Nervous system	comp48393_c0_seq1;comp50622_c0_seq1;comp28070_c0_seq1;comp131364_c0_seq5;comp63187_c0_seq1;comp88273_c0_seq1;comp136825_c0_seq1;comp34319_c0_seq1;comp94378_c0_seq1;comp103787_c0_seq1;comp105760_c0_seq1;comp110021_c0_seq1;comp94723_c0_seq2;comp132220_c0_seq1;comp139836_c0_seq1;comp127476_c1_seq1;comp62091_c0_seq1;comp62091_c1_seq1;comp76287_c0_seq3;comp78441_c0_seq3;comp120370_c0_seq4;comp101986_c…	50
ko05418,Fluid shear stress and atherosclerosis	Human Diseases\Cardiovascular diseases	comp22441_c0_seq1;comp106945_c0_seq1;comp116959_c1_seq2;comp118824_c0_seq1;comp118824_c2_seq2;comp132513_c0_seq3;comp142063_c0_seq1;comp143863_c0_seq1;comp146417_c0_seq1;comp170344_c0_seq1;comp121183_c0_seq3;comp122894_c0_seq1;comp164676_c0_seq1;comp15064_c0_seq1;comp81163_c0_seq2;comp103084_c0_seq1;comp104565_c0_seq1;comp116486_c0_seq2;comp117960_c0_seq1;comp125266_c0_seq6;comp134642_c0_seq2;com…	121
ko03440,Homologous recombination	Genetic Information Processing\Replication and repair	comp122747_c0_seq1;comp123844_c0_seq1;comp121058_c0_seq10;comp124829_c0_seq1;comp133182_c0_seq6;comp133933_c0_seq3;comp133870_c0_seq2;comp135541_c0_seq2;comp128449_c0_seq1;comp131134_c0_seq12;comp99596_c0_seq1;comp125618_c1_seq2;comp127456_c0_seq1;comp135522_c0_seq3;comp98583_c1_seq1;comp123684_c0_seq6;comp98235_c0_seq1;comp116706_c0_seq1;comp129558_c0_seq1;comp131030_c2_seq1;comp132312_c0_seq1;c…	35
ko04730,Long-term depression	Organismal Systems\Nervous system	comp43606_c0_seq1;comp67212_c0_seq1;comp72207_c0_seq1;comp76221_c0_seq1;comp98019_c0_seq3;comp104779_c0_seq1;comp104779_c1_seq1;comp117651_c0_seq1;comp123927_c1_seq1;comp130147_c0_seq16;comp118286_c0_seq17;comp70398_c0_seq2;comp105365_c0_seq2;comp110791_c0_seq7;comp115387_c0_seq4;comp112351_c0_seq1;comp132626_c2_seq4;comp129465_c1_seq1;comp129867_c1_seq13;comp103042_c0_seq1;comp115139_c0_seq4;com…	40
ko04112,Cell cycle - Caulobacter	Cellular Processes\Cell growth and death	comp126833_c0_seq2;comp79152_c0_seq1;comp128539_c1_seq1;comp98058_c0_seq3;	4
ko00643,Styrene degradation	Metabolism\Xenobiotics biodegradation and metabolism	comp121662_c0_seq1;comp119787_c0_seq1;comp122398_c0_seq1;	3
ko04341,Hedgehog signaling pathway - fly	Environmental Information Processing\Signal transduction	comp39758_c0_seq1;comp51614_c0_seq1;comp91872_c0_seq1;comp91872_c1_seq1;comp126190_c0_seq4;comp87288_c0_seq1;comp89647_c0_seq1;comp118642_c0_seq1;comp122789_c0_seq11;comp91137_c1_seq2;comp113728_c0_seq2;comp125540_c0_seq1;comp94045_c0_seq1;comp146137_c0_seq1;comp118180_c0_seq2;comp137715_c0_seq1;comp109553_c0_seq1;comp127778_c0_seq1;comp115728_c0_seq1;comp77720_c0_seq1;comp99302_c0_seq1;comp53457…	35
ko04012,ErbB signaling pathway	Environmental Information Processing\Signal transduction	comp128862_c0_seq4;comp126462_c1_seq4;comp114498_c0_seq27;comp129704_c0_seq3;comp115659_c0_seq2;comp124689_c0_seq2;comp131606_c1_seq17;comp98476_c0_seq1;comp133677_c1_seq142;comp51726_c0_seq1;comp127569_c0_seq2;comp126201_c0_seq1;comp123570_c0_seq7;comp121824_c0_seq2;comp115151_c0_seq2;comp125875_c0_seq3;comp135169_c0_seq3;comp119403_c0_seq1;comp135423_c0_seq1;comp127901_c0_seq6;comp131252_c0_seq…	42
ko05202,Transcriptional misregulation in cancers	Human Diseases\Cancers	comp131075_c2_seq2;comp122253_c0_seq1;comp127614_c0_seq2;comp116131_c0_seq1;comp98289_c0_seq1;comp117123_c0_seq3;comp135414_c0_seq6;comp121264_c0_seq31;comp98827_c0_seq1;comp120601_c0_seq1;comp128323_c0_seq2;comp96804_c0_seq1;comp128143_c1_seq1;comp115682_c0_seq4;comp129790_c0_seq4;comp132796_c0_seq4;comp53390_c0_seq1;comp72044_c0_seq1;comp125211_c0_seq1;comp133708_c2_seq2;comp133708_c4_seq1;comp…	81
ko04962,Vasopressin-regulated water reabsorption	Organismal Systems\Excretory system	comp88143_c0_seq1;comp53062_c0_seq2;comp131247_c0_seq6;comp131291_c0_seq1;comp122789_c0_seq11;comp106605_c0_seq2;comp125091_c0_seq1;comp126135_c1_seq1;comp118167_c0_seq3;comp135622_c0_seq1;comp45543_c0_seq2;comp97655_c0_seq1;comp98176_c0_seq1;comp112745_c0_seq1;comp112745_c1_seq1;comp129569_c0_seq2;comp137093_c0_seq1;comp137912_c0_seq1;comp110971_c0_seq9;comp116299_c1_seq2;comp105885_c0_seq3;comp…	34
ko05145,Toxoplasmosis	Human Diseases\Infectious diseases	comp105904_c0_seq1;comp119490_c0_seq1;comp127007_c0_seq1;comp125986_c0_seq1;comp113693_c0_seq2;comp117864_c0_seq1;comp125572_c0_seq7;comp127257_c1_seq1;comp98858_c0_seq1;comp122959_c0_seq1;comp116805_c0_seq2;comp116098_c0_seq6;comp130337_c0_seq1;comp129098_c0_seq1;comp123400_c0_seq1;comp110082_c0_seq2;comp101765_c0_seq1;comp126837_c0_seq1;comp38858_c0_seq1;comp44881_c0_seq1;comp92459_c0_seq1;comp…	81
ko00770,Pantothenate and CoA biosynthesis	Metabolism\Metabolism of cofactors and vitamins	comp108341_c0_seq3;comp127924_c0_seq7;comp131363_c0_seq3;comp129218_c0_seq1;comp52188_c0_seq1;comp52188_c1_seq1;comp72551_c0_seq1;comp112824_c0_seq3;comp112932_c0_seq3;comp118272_c0_seq2;comp119373_c0_seq2;comp137749_c0_seq1;comp130359_c1_seq3;comp123118_c0_seq1;comp102003_c1_seq3;comp126692_c0_seq1;comp132111_c0_seq7;comp52950_c0_seq1;comp115398_c0_seq2;comp132173_c0_seq1;comp131651_c0_seq7;comp…	22
ko00592,alpha-Linolenic acid metabolism	Metabolism\Lipid metabolism	comp38327_c0_seq1;comp110160_c0_seq2;comp110342_c0_seq4;comp127165_c0_seq1;comp128330_c3_seq1;comp129542_c0_seq2;comp129894_c0_seq2;comp68410_c0_seq1;comp68410_c1_seq1;comp118835_c0_seq1;comp133975_c1_seq1;comp135764_c0_seq3;comp61857_c0_seq1;comp63718_c0_seq1;comp70312_c0_seq1;comp115892_c0_seq1;comp127584_c0_seq1;comp130620_c0_seq3;comp134966_c0_seq8;comp148829_c0_seq1;	20
ko05210,Colorectal cancer	Human Diseases\Cancers	comp94045_c0_seq1;comp146137_c0_seq1;comp127846_c0_seq1;comp119269_c0_seq1;comp135412_c0_seq2;comp124993_c0_seq2;comp131935_c0_seq2;comp98289_c0_seq1;comp117123_c0_seq3;comp129465_c1_seq1;comp129867_c1_seq13;comp125932_c0_seq2;comp135196_c0_seq10;comp127328_c0_seq4;comp125450_c0_seq1;comp103042_c0_seq1;comp115139_c0_seq4;comp98858_c0_seq1;comp135827_c0_seq1;comp69733_c0_seq2;comp79138_c0_seq1;com…	37
ko04630,Jak-STAT signaling pathway	Environmental Information Processing\Signal transduction	comp129617_c0_seq24;comp105904_c0_seq1;comp131606_c1_seq17;comp116657_c0_seq1;comp120158_c0_seq6;comp122821_c0_seq1;comp115837_c0_seq2;comp124529_c0_seq1;comp110082_c0_seq2;comp104073_c0_seq1;comp98289_c0_seq1;comp117123_c0_seq3;comp96298_c0_seq2;comp108686_c1_seq2;comp148658_c0_seq1;comp128339_c0_seq1;comp109498_c0_seq3;comp113981_c0_seq1;comp128411_c1_seq1;comp116513_c1_seq1;comp125174_c0_seq1;…	30
ko04640,Hematopoietic cell lineage	Organismal Systems\Immune system	comp114273_c0_seq2;comp51444_c0_seq1;comp83008_c0_seq2;comp99059_c0_seq1;comp99059_c1_seq1;comp100256_c0_seq1;comp100256_c1_seq1;comp106295_c0_seq1;comp111618_c0_seq1;comp124186_c0_seq3;comp141979_c0_seq1;comp142005_c0_seq1;comp152298_c0_seq1;	13
ko00430,Taurine and hypotaurine metabolism	Metabolism\Metabolism of other amino acids	comp131900_c0_seq4;comp121860_c0_seq3;comp125128_c0_seq1;comp125128_c1_seq1;comp132341_c0_seq7;comp103443_c0_seq1;comp122989_c0_seq1;comp125949_c0_seq15;	8
ko05340,Primary immunodeficiency	Human Diseases\Immune diseases	comp121480_c0_seq6;comp130404_c0_seq1;comp123949_c0_seq1;comp135385_c0_seq2;comp126453_c0_seq4;comp104967_c0_seq2;	6
ko00900,Terpenoid backbone biosynthesis	Metabolism\Metabolism of terpenoids and polyketides	comp128696_c0_seq3;comp65996_c0_seq1;comp65996_c1_seq1;comp119581_c0_seq2;comp78582_c0_seq1;comp118168_c0_seq1;comp127731_c0_seq2;comp132303_c0_seq2;comp99579_c0_seq1;comp126094_c0_seq1;comp130762_c0_seq1;comp123091_c0_seq1;comp126898_c1_seq2;comp134556_c1_seq1;comp123608_c0_seq1;comp118734_c0_seq1;comp129039_c0_seq1;comp133605_c0_seq1;comp130058_c1_seq6;comp130426_c0_seq1;	20
ko04657,IL-17 signaling pathway	Organismal Systems\Immune system	comp131813_c0_seq5;comp113693_c0_seq2;comp123400_c0_seq1;comp135827_c0_seq1;comp114470_c0_seq1;comp22441_c0_seq1;comp106945_c0_seq1;comp116959_c1_seq2;comp118824_c0_seq1;comp118824_c2_seq2;comp132513_c0_seq3;comp142063_c0_seq1;comp143863_c0_seq1;comp146417_c0_seq1;comp170344_c0_seq1;comp121183_c0_seq3;comp122894_c0_seq1;comp164676_c0_seq1;comp125921_c0_seq2;comp117864_c0_seq1;comp125572_c0_seq7;c…	36
ko04966,Collecting duct acid secretion	Organismal Systems\Excretory system	comp121084_c0_seq1;comp56944_c0_seq1;comp128162_c0_seq1;comp154845_c0_seq1;comp83909_c0_seq1;comp118027_c0_seq1;comp39195_c0_seq1;comp105135_c0_seq1;comp99332_c0_seq1;comp107750_c0_seq1;comp129155_c0_seq2;comp93473_c0_seq4;comp120710_c0_seq1;comp130740_c1_seq7;comp108226_c0_seq1;comp115623_c0_seq1;comp149981_c0_seq1;comp109972_c0_seq1;	18
ko04915,Estrogen signaling pathway	Organismal Systems\Endocrine system	comp22441_c0_seq1;comp106945_c0_seq1;comp116959_c1_seq2;comp118824_c0_seq1;comp118824_c2_seq2;comp132513_c0_seq3;comp142063_c0_seq1;comp143863_c0_seq1;comp146417_c0_seq1;comp170344_c0_seq1;comp121183_c0_seq3;comp122894_c0_seq1;comp164676_c0_seq1;comp109701_c0_seq1;comp44881_c0_seq1;comp92459_c0_seq1;comp98028_c0_seq1;comp98121_c0_seq1;comp99645_c0_seq1;comp102890_c0_seq1;comp107580_c0_seq1;comp10…	90
ko04914,Progesterone-mediated oocyte maturation	Organismal Systems\Endocrine system	comp127328_c0_seq4;comp125932_c0_seq2;comp135196_c0_seq10;comp122959_c0_seq1;comp116098_c0_seq6;comp117935_c0_seq2;comp131187_c0_seq19;comp110306_c0_seq1;comp118155_c0_seq2;comp125268_c1_seq1;comp143129_c0_seq1;comp131247_c0_seq6;comp114370_c0_seq1;comp130573_c0_seq8;comp131291_c0_seq1;comp122789_c0_seq11;comp116231_c0_seq1;comp131054_c0_seq27;comp114987_c0_seq13;comp113585_c0_seq1;comp114381_c0_…	66
ko00908,Zeatin biosynthesis	Metabolism\Metabolism of terpenoids and polyketides	comp112451_c0_seq2;	1
ko05140,Leishmaniasis	Human Diseases\Infectious diseases	comp38858_c0_seq1;comp119490_c0_seq1;comp127007_c0_seq1;comp125986_c0_seq1;comp113693_c0_seq2;comp117864_c0_seq1;comp125572_c0_seq7;comp127257_c1_seq1;comp129098_c0_seq1;comp123400_c0_seq1;comp88228_c0_seq1;comp114058_c0_seq3;comp116792_c0_seq1;comp122309_c1_seq16;comp125874_c0_seq1;comp130927_c1_seq2;comp152004_c0_seq1;comp112504_c0_seq2;comp130217_c0_seq1;comp98858_c0_seq1;comp135827_c0_seq1;co…	23
ko04371,Apelin signaling pathway	Environmental Information Processing\Signal transduction	comp131187_c0_seq19;comp110306_c0_seq1;comp118155_c0_seq2;comp125268_c1_seq1;comp143129_c0_seq1;comp131247_c0_seq6;comp114370_c0_seq1;comp130573_c0_seq8;comp131291_c0_seq1;comp122789_c0_seq11;comp132995_c0_seq1;comp117935_c0_seq2;comp53435_c0_seq1;comp100060_c0_seq2;comp93663_c0_seq1;comp110926_c0_seq1;comp121285_c0_seq3;comp116374_c0_seq9;comp131553_c0_seq1;comp134353_c0_seq3;comp37869_c0_seq1;c…	103
ko04138,Autophagy - yeast	Cellular Processes\Transport and catabolism	comp129465_c1_seq1;comp129867_c1_seq13;comp122789_c0_seq11;comp127255_c0_seq1;comp131779_c0_seq1;comp130040_c0_seq6;comp124256_c0_seq1;comp135176_c0_seq1;comp133630_c0_seq1;comp132312_c1_seq2;comp117759_c0_seq1;comp128617_c1_seq1;comp133771_c0_seq6;comp121614_c0_seq6;comp135719_c0_seq1;comp120497_c0_seq4;comp123651_c0_seq1;comp112351_c0_seq1;comp132626_c2_seq4;comp130618_c1_seq12;comp102005_c0_se…	68
ko03410,Base excision repair	Genetic Information Processing\Replication and repair	comp130193_c0_seq1;comp88555_c0_seq2;comp131841_c0_seq1;comp131841_c1_seq1;comp118849_c0_seq1;comp121296_c0_seq8;comp104967_c0_seq2;comp123298_c0_seq1;comp134685_c0_seq3;comp132485_c0_seq6;comp133243_c0_seq1;comp118782_c1_seq4;comp126799_c1_seq1;comp135770_c0_seq1;comp113253_c0_seq1;comp122839_c0_seq2;comp128043_c0_seq3;comp116879_c0_seq4;comp130521_c0_seq2;comp38552_c0_seq1;comp102893_c0_seq1;co…	39
ko04723,Retrograde endocannabinoid signaling	Organismal Systems\Nervous system	comp38328_c0_seq1;comp44342_c0_seq1;comp109217_c0_seq2;comp115735_c0_seq2;comp137249_c0_seq1;comp138265_c0_seq1;comp61452_c0_seq1;comp108519_c0_seq5;comp93663_c0_seq1;comp110926_c0_seq1;comp121285_c0_seq3;comp116374_c0_seq9;comp131553_c0_seq1;comp134353_c0_seq3;comp129704_c0_seq3;comp122699_c0_seq1;comp129797_c0_seq2;comp112504_c0_seq2;comp130217_c0_seq1;comp127681_c0_seq3;comp117935_c0_seq2;comp…	51
ko04670,Leukocyte transendothelial migration	Organismal Systems\Immune system	comp88228_c0_seq1;comp114058_c0_seq3;comp116792_c0_seq1;comp122309_c1_seq16;comp125874_c0_seq1;comp130927_c1_seq2;comp152004_c0_seq1;comp42686_c0_seq1;comp47174_c0_seq1;comp49314_c0_seq2;comp49327_c0_seq2;comp51870_c0_seq1;comp64597_c0_seq2;comp65285_c0_seq1;comp79883_c0_seq1;comp80594_c0_seq1;comp80594_c1_seq1;comp83237_c0_seq1;comp85647_c0_seq2;comp94120_c0_seq1;comp99312_c0_seq2;comp107650_c0_…	75
ko04913,Ovarian Steroidogenesis	Organismal Systems\Endocrine system	comp53062_c0_seq2;comp131187_c0_seq19;comp110306_c0_seq1;comp118155_c0_seq2;comp125268_c1_seq1;comp143129_c0_seq1;comp131247_c0_seq6;comp114370_c0_seq1;comp130573_c0_seq8;comp131291_c0_seq1;comp122789_c0_seq11;comp68410_c0_seq1;comp68410_c1_seq1;comp118835_c0_seq1;comp115433_c0_seq4;comp112504_c0_seq2;comp130217_c0_seq1;comp50097_c0_seq1;comp94590_c0_seq1;comp117192_c0_seq1;comp132702_c0_seq3;com…	27
ko01040,Biosynthesis of unsaturated fatty acids	Metabolism\Lipid metabolism	comp119292_c1_seq1;comp112665_c0_seq1;comp113095_c0_seq1;comp125277_c0_seq1;comp132494_c0_seq3;comp28712_c0_seq1;comp109127_c0_seq1;comp134269_c0_seq1;comp129449_c0_seq1;comp115424_c0_seq10;comp112506_c0_seq1;comp61857_c0_seq1;comp63718_c0_seq1;comp70312_c0_seq1;comp115892_c0_seq1;comp127584_c0_seq1;comp130620_c0_seq3;comp134966_c0_seq8;comp148829_c0_seq1;comp15023_c0_seq1;comp122170_c0_seq1;comp…	25
ko00071,Fatty acid degradation	Metabolism\Lipid metabolism	comp128696_c0_seq3;comp118800_c2_seq1;comp132363_c0_seq1;comp39237_c0_seq1;comp150291_c0_seq1;comp15023_c0_seq1;comp122170_c0_seq1;comp113963_c0_seq1;comp61857_c0_seq1;comp63718_c0_seq1;comp70312_c0_seq1;comp115892_c0_seq1;comp127584_c0_seq1;comp130620_c0_seq3;comp134966_c0_seq8;comp148829_c0_seq1;comp122249_c0_seq1;comp115988_c0_seq1;comp126756_c0_seq1;comp119137_c0_seq1;comp121413_c0_seq1;comp1…	54
ko04510,Focal adhesion	Cellular Processes\Cellular community - eukaryotes	comp121485_c0_seq1;comp109400_c0_seq5;comp124987_c0_seq5;comp125713_c0_seq3;comp129711_c0_seq1;comp151555_c0_seq1;comp116011_c0_seq1;comp82789_c0_seq1;comp110221_c0_seq1;comp133799_c0_seq1;comp163719_c0_seq1;comp12472_c0_seq1;comp54199_c0_seq1;comp66753_c0_seq2;comp76476_c0_seq1;comp104786_c0_seq2;comp133546_c0_seq6;comp138069_c0_seq1;comp155806_c0_seq1;comp164630_c0_seq1;comp169740_c0_seq1;comp8…	163
ko00510,N-Glycan biosynthesis	Metabolism\Glycan biosynthesis and metabolism	comp130259_c0_seq3;comp128596_c0_seq1;comp128233_c0_seq1;comp112998_c0_seq1;comp133921_c0_seq2;comp83742_c0_seq2;comp117373_c0_seq2;comp98821_c0_seq1;comp121290_c0_seq1;comp132451_c0_seq1;comp110655_c0_seq1;comp133718_c0_seq3;comp108197_c0_seq2;comp113406_c0_seq1;comp134546_c0_seq1;comp53016_c0_seq1;comp121590_c0_seq1;comp105468_c0_seq1;comp127317_c0_seq2;comp88649_c0_seq1;comp125785_c0_seq1;comp…	43
ko04066,HIF-1 signaling pathway	Environmental Information Processing\Signal transduction	comp38858_c0_seq1;comp123400_c0_seq1;comp50097_c0_seq1;comp94590_c0_seq1;comp117192_c0_seq1;comp132702_c0_seq3;comp134550_c0_seq8;comp135037_c0_seq12;comp142807_c0_seq1;comp128862_c0_seq4;comp115139_c0_seq4;comp98858_c0_seq1;comp129220_c0_seq1;comp125932_c0_seq2;comp135196_c0_seq10;comp127328_c0_seq4;comp125450_c0_seq1;comp135719_c0_seq1;comp114845_c0_seq2;comp119540_c0_seq1;comp125752_c0_seq2;co…	63
ko04514,Cell adhesion molecules (CAMs)	Environmental Information Processing\Signaling molecules and interaction	comp88228_c0_seq1;comp114058_c0_seq3;comp116792_c0_seq1;comp122309_c1_seq16;comp125874_c0_seq1;comp130927_c1_seq2;comp152004_c0_seq1;comp130951_c0_seq10;comp75945_c0_seq1;comp119804_c0_seq7;comp38982_c0_seq1;comp64456_c1_seq1;comp118854_c0_seq7;comp120086_c0_seq1;comp132380_c0_seq4;comp135074_c0_seq20;comp122828_c0_seq1;comp126456_c0_seq3;comp21213_c0_seq1;comp49336_c0_seq1;comp73663_c0_seq1;comp…	39
ko04611,Platelet activation	Organismal Systems\Immune system	comp112176_c0_seq1;comp116613_c0_seq1;comp127138_c1_seq4;comp113935_c0_seq1;comp124459_c0_seq1;comp133904_c1_seq1;comp116867_c0_seq1;comp128828_c2_seq4;comp135158_c0_seq6;comp91077_c0_seq1;comp92331_c0_seq2;comp117536_c0_seq1;comp118092_c0_seq1;comp126453_c0_seq4;comp134353_c0_seq3;comp129101_c0_seq4;comp86769_c0_seq1;comp93663_c0_seq1;comp110926_c0_seq1;comp121285_c0_seq3;comp116374_c0_seq9;comp…	105
ko04974,Protein digestion and absorption	Organismal Systems\Digestive system	comp51447_c0_seq1;comp67738_c0_seq1;comp95091_c0_seq1;comp95459_c0_seq1;comp97058_c0_seq1;comp112515_c1_seq2;comp114586_c0_seq5;comp117786_c0_seq1;comp118519_c0_seq1;comp119423_c0_seq2;comp120809_c1_seq3;comp129468_c0_seq3;comp132693_c0_seq7;comp138465_c0_seq1;comp143658_c0_seq1;comp146597_c0_seq1;comp162097_c0_seq1;comp99481_c0_seq3;comp119158_c1_seq1;comp120090_c0_seq2;comp126637_c0_seq1;comp12…	58
ko00603,Glycosphingolipid biosynthesis - globo and isoglobo series	Metabolism\Glycan biosynthesis and metabolism	comp38873_c0_seq1;comp113389_c0_seq3;comp113998_c1_seq11;comp123406_c0_seq3;comp128581_c0_seq13;comp16852_c0_seq1;comp37514_c0_seq1;comp67731_c0_seq2;comp117341_c0_seq1;comp123066_c0_seq1;comp125427_c0_seq2;comp126601_c0_seq1;comp138790_c0_seq1;comp143147_c0_seq1;comp118921_c1_seq4;comp124141_c0_seq2;comp128280_c2_seq3;comp167181_c0_seq1;comp40209_c0_seq1;comp109317_c0_seq2;comp120612_c0_seq3;com…	23
ko00780,Biotin metabolism	Metabolism\Metabolism of cofactors and vitamins	comp132296_c0_seq1;comp135386_c0_seq1;	2
ko04146,Peroxisome	Cellular Processes\Transport and catabolism	comp103929_c0_seq1;comp131420_c1_seq2;comp130745_c2_seq2;comp146740_c0_seq1;comp129565_c0_seq1;comp138089_c0_seq1;comp133541_c0_seq1;comp124672_c0_seq1;comp45430_c0_seq1;comp134657_c0_seq84;comp123197_c0_seq2;comp134415_c2_seq1;comp118995_c0_seq1;comp120394_c0_seq1;comp63709_c0_seq1;comp63709_c1_seq1;comp131295_c0_seq1;comp132342_c0_seq3;comp132615_c0_seq1;comp133931_c0_seq1;comp134700_c0_seq1;co…	98
ko00591,Linoleic acid metabolism	Metabolism\Lipid metabolism	comp38327_c0_seq1;comp110160_c0_seq2;comp110342_c0_seq4;comp127165_c0_seq1;comp128330_c3_seq1;comp129542_c0_seq2;comp129894_c0_seq2;comp68410_c0_seq1;comp68410_c1_seq1;comp118835_c0_seq1;comp133975_c1_seq1;comp135764_c0_seq3;	12
ko04139,Mitophagy - yeast	Cellular Processes\Transport and catabolism	comp135719_c0_seq1;comp127614_c0_seq2;comp129704_c0_seq3;comp116098_c0_seq6;comp121174_c0_seq2;comp80806_c0_seq1;comp126314_c0_seq1;comp131878_c0_seq6;comp100593_c0_seq1;comp116261_c0_seq1;comp119631_c0_seq1;comp125948_c0_seq1;comp127255_c0_seq1;comp131779_c0_seq1;comp134354_c0_seq24;comp124111_c1_seq7;comp88631_c0_seq1;comp128454_c0_seq8;comp131002_c3_seq1;	19
ko00640,Propanoate metabolism	Metabolism\Carbohydrate metabolism	comp133404_c0_seq4;comp134114_c0_seq1;comp129141_c0_seq1;comp133476_c0_seq1;comp129274_c0_seq3;comp134418_c0_seq2;comp114733_c0_seq1;comp115988_c0_seq1;comp15023_c0_seq1;comp122170_c0_seq1;comp113963_c0_seq1;comp125496_c2_seq3;comp132667_c0_seq7;comp117292_c0_seq1;comp121569_c0_seq3;comp135141_c0_seq1;comp113893_c0_seq2;comp129795_c0_seq8;comp119365_c0_seq1;comp125189_c3_seq2;comp122651_c3_seq1;c…	28
ko04011,MAPK signaling pathway - yeast	Environmental Information Processing\Signal transduction	comp134730_c0_seq2;comp82174_c0_seq1;comp89742_c0_seq1;comp119876_c0_seq1;comp121954_c0_seq1;comp132738_c0_seq3;comp115151_c0_seq2;comp125875_c0_seq3;comp135169_c0_seq3;comp98858_c0_seq1;comp40242_c0_seq1;comp110597_c0_seq2;comp110597_c1_seq1;comp110597_c2_seq2;comp124771_c0_seq2;comp134354_c0_seq24;comp112176_c0_seq1;comp116613_c0_seq1;comp129704_c0_seq3;comp127110_c0_seq14;comp124066_c0_seq1;co…	34
ko00980,Metabolism of xenobiotics by cytochrome P450	Metabolism\Xenobiotics biodegradation and metabolism	comp94671_c0_seq1;comp105496_c0_seq1;comp108552_c0_seq1;comp114504_c0_seq1;comp114807_c0_seq1;comp115594_c0_seq1;comp120013_c0_seq1;comp121099_c2_seq10;comp123587_c0_seq2;comp127153_c0_seq1;comp127192_c1_seq1;comp130038_c0_seq1;comp127285_c0_seq1;comp96534_c0_seq2;comp112539_c0_seq2;comp134277_c0_seq1;comp46379_c0_seq1;comp72661_c0_seq1;comp130338_c0_seq1;comp115769_c0_seq1;comp106978_c0_seq1;com…	39
ko00901,Indole alkaloid biosynthesis	Metabolism\Biosynthesis of other secondary metabolites	comp105463_c0_seq1;comp147747_c0_seq1;	2
ko01230,Biosynthesis of amino acids	Metabolism\Overview	comp45583_c0_seq1;comp115429_c0_seq1;comp115646_c0_seq1;comp170480_c0_seq1;comp46251_c0_seq1;comp90932_c0_seq1;comp110416_c0_seq1;comp115481_c0_seq1;comp121598_c0_seq1;comp118439_c0_seq1;comp111185_c0_seq2;comp40650_c0_seq1;comp90299_c0_seq1;comp91918_c0_seq1;comp98580_c0_seq1;comp107557_c0_seq1;comp94084_c0_seq1;comp108284_c0_seq4;comp118559_c0_seq1;comp119897_c0_seq1;comp119897_c1_seq1;comp1369…	101
ko04726,Serotonergic synapse	Organismal Systems\Nervous system	comp105463_c0_seq1;comp147747_c0_seq1;comp28070_c0_seq1;comp131364_c0_seq5;comp38328_c0_seq1;comp44342_c0_seq1;comp109217_c0_seq2;comp115735_c0_seq2;comp137249_c0_seq1;comp138265_c0_seq1;comp93663_c0_seq1;comp110926_c0_seq1;comp121285_c0_seq3;comp116374_c0_seq9;comp131553_c0_seq1;comp134353_c0_seq3;comp129704_c0_seq3;comp98858_c0_seq1;comp68410_c0_seq1;comp68410_c1_seq1;comp118835_c0_seq1;comp115…	45
ko04111,Cell cycle - yeast	Cellular Processes\Cell growth and death	comp130756_c0_seq1;comp127087_c0_seq3;comp125546_c0_seq1;comp131283_c0_seq1;comp126552_c0_seq1;comp129529_c0_seq1;comp127074_c0_seq1;comp133158_c0_seq1;comp115378_c0_seq1;comp126771_c0_seq1;comp134003_c2_seq1;comp133758_c1_seq2;comp123127_c0_seq1;comp111899_c0_seq2;comp132762_c0_seq2;comp133018_c0_seq1;comp111745_c0_seq1;comp134619_c0_seq1;comp114470_c0_seq1;comp114993_c0_seq1;comp135312_c0_seq1;…	63
ko00830,Retinol metabolism	Metabolism\Metabolism of cofactors and vitamins	comp78473_c0_seq1;comp107196_c0_seq2;comp110880_c0_seq1;comp130864_c0_seq3;comp99979_c0_seq1;comp110124_c0_seq5;comp112272_c0_seq3;comp114290_c0_seq1;comp122838_c0_seq2;comp125420_c0_seq3;comp125490_c0_seq1;comp127139_c0_seq3;comp129029_c0_seq2;comp129967_c0_seq11;comp106083_c0_seq2;comp108157_c1_seq1;comp115203_c1_seq5;comp119891_c0_seq1;comp106978_c0_seq1;comp114391_c0_seq1;comp117540_c0_seq4;c…	36
ko00340,Histidine metabolism	Metabolism\Amino acid metabolism	comp147057_c0_seq1;comp129378_c0_seq1;comp96465_c0_seq1;comp118252_c0_seq1;comp101630_c0_seq1;comp101630_c1_seq1;comp105463_c0_seq1;comp147747_c0_seq1;comp50612_c0_seq1;comp106760_c0_seq1;comp113029_c0_seq1;comp113224_c0_seq1;comp128120_c0_seq1;comp129950_c1_seq1;comp132101_c0_seq4;comp135684_c1_seq4;comp129394_c0_seq1;comp130399_c0_seq1;comp131456_c0_seq1;comp129177_c0_seq2;	20
ko05134,Legionellosis	Human Diseases\Infectious diseases	comp117731_c0_seq1;comp154699_c0_seq1;comp88971_c0_seq1;comp101512_c0_seq2;comp108896_c0_seq1;comp111614_c0_seq2;comp128433_c0_seq1;comp135804_c0_seq1;comp100690_c0_seq1;comp116598_c0_seq3;comp128350_c0_seq1;comp129952_c0_seq1;comp126558_c1_seq1;comp114255_c0_seq1;comp125945_c0_seq5;comp127265_c0_seq2;comp45705_c0_seq1;comp110420_c0_seq1;comp131813_c0_seq5;comp119277_c1_seq1;comp129098_c0_seq1;co…	69
ko04016,MAPK signaling pathway - plant	Environmental Information Processing\Signal transduction	comp39206_c0_seq1;comp50829_c0_seq1;comp96962_c0_seq1;comp124696_c0_seq7;comp131173_c0_seq2;comp131257_c0_seq7;comp151454_c0_seq1;comp134105_c0_seq2;comp135728_c1_seq4;comp11549_c0_seq1;comp119594_c1_seq4;comp128248_c0_seq1;comp150763_c0_seq1;comp15064_c0_seq1;comp81163_c0_seq2;comp103084_c0_seq1;comp104565_c0_seq1;comp116486_c0_seq2;comp117960_c0_seq1;comp125266_c0_seq6;comp134642_c0_seq2;comp16…	22
ko04072,Phospholipase D signaling pathway	Environmental Information Processing\Signal transduction	comp128862_c0_seq4;comp50097_c0_seq1;comp94590_c0_seq1;comp117192_c0_seq1;comp132702_c0_seq3;comp134550_c0_seq8;comp135037_c0_seq12;comp142807_c0_seq1;comp128813_c0_seq3;comp116119_c0_seq1;comp122380_c1_seq3;comp110195_c0_seq1;comp129465_c1_seq1;comp129867_c1_seq13;comp108352_c0_seq1;comp119643_c0_seq1;comp124594_c0_seq1;comp125932_c0_seq2;comp135196_c0_seq10;comp127328_c0_seq4;comp125450_c0_seq1…	86
ko04380,Osteoclast differentiation	Organismal Systems\Development	comp128813_c0_seq3;comp98858_c0_seq1;comp125932_c0_seq2;comp135196_c0_seq10;comp127328_c0_seq4;comp125450_c0_seq1;comp122978_c1_seq1;comp113693_c0_seq2;comp130337_c0_seq1;comp117864_c0_seq1;comp125572_c0_seq7;comp127257_c1_seq1;comp129098_c0_seq1;comp123400_c0_seq1;comp115139_c0_seq4;comp116098_c0_seq6;comp131252_c0_seq2;comp122959_c0_seq1;comp135827_c0_seq1;comp69733_c0_seq2;comp79138_c0_seq1;co…	31
ko00950,Isoquinoline alkaloid biosynthesis	Metabolism\Biosynthesis of other secondary metabolites	comp128218_c0_seq1;comp98132_c0_seq1;comp139152_c0_seq1;comp116839_c0_seq4;comp122409_c0_seq5;comp42567_c0_seq1;comp83004_c0_seq1;comp117513_c0_seq1;comp105463_c0_seq1;comp147747_c0_seq1;	10
ko05203,Viral carcinogenesis	Human Diseases\Cancers	comp98476_c0_seq1;comp133677_c1_seq142;comp129465_c1_seq1;comp129867_c1_seq13;comp98858_c0_seq1;comp124658_c0_seq1;comp108518_c0_seq1;comp125091_c0_seq1;comp126135_c1_seq1;comp134153_c0_seq1;comp39246_c0_seq1;comp88834_c0_seq2;comp136540_c0_seq1;comp46651_c0_seq1;comp82047_c0_seq1;comp112106_c0_seq1;comp143882_c0_seq1;comp131606_c1_seq17;comp125932_c0_seq2;comp135196_c0_seq10;comp127328_c0_seq4;c…	110
ko03030,DNA replication	Genetic Information Processing\Replication and repair	comp122747_c0_seq1;comp126570_c0_seq1;comp126570_c2_seq3;comp98583_c1_seq1;comp123684_c0_seq6;comp120735_c0_seq1;comp131791_c0_seq1;comp134071_c0_seq2;comp125166_c0_seq1;comp133696_c0_seq2;comp113928_c0_seq1;comp135634_c0_seq1;comp124641_c0_seq2;comp130565_c0_seq14;comp114135_c0_seq1;comp119858_c0_seq1;comp128265_c0_seq4;comp128265_c1_seq3;comp111883_c0_seq1;comp131845_c2_seq1;comp133158_c0_seq1;…	35
ko05205,Proteoglycans in cancer	Human Diseases\Cancers	comp98476_c0_seq1;comp133677_c1_seq142;comp126884_c1_seq10;comp128813_c0_seq3;comp129465_c1_seq1;comp129867_c1_seq13;comp119643_c0_seq1;comp108352_c0_seq1;comp103042_c0_seq1;comp115139_c0_seq4;comp98858_c0_seq1;comp69733_c0_seq2;comp79138_c0_seq1;comp125510_c1_seq1;comp133044_c0_seq1;comp128417_c0_seq3;comp82174_c0_seq1;comp89742_c0_seq1;comp119876_c0_seq1;comp121954_c0_seq1;comp132738_c0_seq3;co…	205
ko00960,Tropane, piperidine and pyridine alkaloid biosynthesis	Metabolism\Biosynthesis of other secondary metabolites	comp128218_c0_seq1;comp98132_c0_seq1;comp139152_c0_seq1;comp116839_c0_seq4;	4
ko04261,Adrenergic signaling in cardiomyocytes	Organismal Systems\Circulatory system	comp53062_c0_seq2;comp131187_c0_seq19;comp110306_c0_seq1;comp118155_c0_seq2;comp125268_c1_seq1;comp143129_c0_seq1;comp131247_c0_seq6;comp114370_c0_seq1;comp130573_c0_seq8;comp131291_c0_seq1;comp122789_c0_seq11;comp117171_c1_seq3;comp121757_c0_seq1;comp124835_c0_seq2;comp78875_c0_seq7;comp102019_c0_seq1;comp107556_c0_seq1;comp112206_c0_seq4;comp113972_c0_seq3;comp111791_c0_seq5;comp38328_c0_seq1;c…	106
ko04713,Circadian entrainment	Organismal Systems\Environmental adaptation	comp53028_c0_seq1;comp65972_c0_seq1;comp96648_c0_seq2;comp117449_c0_seq2;comp120104_c0_seq11;comp32793_c0_seq1;comp124941_c0_seq13;comp137748_c0_seq1;comp138748_c0_seq1;comp152896_c0_seq1;comp15064_c0_seq1;comp81163_c0_seq2;comp103084_c0_seq1;comp104565_c0_seq1;comp116486_c0_seq2;comp117960_c0_seq1;comp125266_c0_seq6;comp134642_c0_seq2;comp164180_c0_seq1;comp114498_c0_seq27;comp43606_c0_seq1;comp…	81
ko04668,TNF signaling pathway	Environmental Information Processing\Signal transduction	comp101765_c0_seq1;comp117864_c0_seq1;comp125572_c0_seq7;comp127257_c1_seq1;comp127901_c0_seq6;comp131252_c0_seq2;comp122959_c0_seq1;comp135827_c0_seq1;comp116805_c0_seq2;comp116098_c0_seq6;comp130170_c0_seq5;comp130337_c0_seq1;comp129098_c0_seq1;comp123400_c0_seq1;comp115139_c0_seq4;comp98858_c0_seq1;comp94697_c0_seq2;comp125091_c0_seq1;comp126135_c1_seq1;comp124658_c0_seq1;comp108518_c0_seq1;co…	41
ko00601,Glycosphingolipid biosynthesis - lacto and neolacto series	Metabolism\Glycan biosynthesis and metabolism	comp1983_c0_seq1;comp63216_c0_seq1;comp63216_c1_seq1;comp79679_c0_seq2;comp88205_c0_seq2;comp105159_c0_seq3;comp113154_c0_seq1;comp114752_c0_seq2;comp117160_c0_seq2;comp117598_c0_seq15;comp118658_c0_seq2;comp119057_c0_seq1;comp123854_c0_seq13;comp124640_c0_seq9;comp126033_c0_seq4;comp130834_c0_seq4;comp40209_c0_seq1;comp109317_c0_seq2;comp120612_c0_seq3;comp124114_c0_seq14;comp127006_c0_seq10;com…	28
ko03018,RNA degradation	Genetic Information Processing\Folding, sorting and degradation	comp123685_c0_seq1;comp53798_c0_seq1;comp91236_c0_seq1;comp112265_c0_seq1;comp114782_c0_seq1;comp125732_c0_seq1;comp118643_c0_seq3;comp117610_c0_seq1;comp110156_c0_seq4;comp124467_c0_seq1;comp127658_c0_seq1;comp132529_c0_seq1;comp129766_c1_seq5;comp114146_c1_seq1;comp133668_c0_seq1;comp129741_c0_seq2;comp133201_c0_seq1;comp133986_c0_seq1;comp131251_c0_seq1;comp129438_c0_seq1;comp123370_c1_seq1;co…	66
ko00532,Glycosaminoglycan biosynthesis - chondroitin sulfate / dermatan sulfate	Metabolism\Glycan biosynthesis and metabolism	comp134427_c1_seq1;comp125755_c1_seq3;comp120380_c0_seq1;comp120911_c0_seq9;comp72514_c0_seq1;comp119754_c0_seq1;comp130732_c0_seq6;comp126111_c0_seq4;comp129374_c0_seq1;comp38437_c0_seq2;comp57154_c0_seq1;comp75071_c0_seq1;comp98733_c0_seq1;comp101995_c1_seq1;comp103006_c0_seq1;comp114542_c0_seq3;comp114696_c0_seq1;comp114800_c0_seq2;comp117388_c0_seq14;comp117860_c0_seq10;comp121556_c0_seq2;com…	30
ko04626,Plant-pathogen interaction	Organismal Systems\Environmental adaptation	comp15064_c0_seq1;comp81163_c0_seq2;comp103084_c0_seq1;comp104565_c0_seq1;comp116486_c0_seq2;comp117960_c0_seq1;comp125266_c0_seq6;comp134642_c0_seq2;comp164180_c0_seq1;comp115139_c0_seq4;comp129387_c0_seq14;comp121183_c0_seq3;comp122894_c0_seq1;comp164676_c0_seq1;comp22441_c0_seq1;comp106945_c0_seq1;comp116959_c1_seq2;comp118824_c0_seq1;comp118824_c2_seq2;comp132513_c0_seq3;comp142063_c0_seq1;co…	24
ko05161,Hepatitis B	Human Diseases\Infectious diseases	comp112099_c0_seq7;comp122959_c0_seq1;comp122978_c1_seq1;comp98289_c0_seq1;comp117123_c0_seq3;comp109498_c0_seq3;comp113981_c0_seq1;comp128411_c1_seq1;comp131813_c0_seq5;comp134153_c0_seq1;comp129262_c1_seq2;comp131111_c0_seq1;comp39246_c0_seq1;comp88834_c0_seq2;comp136540_c0_seq1;comp127901_c0_seq6;comp129098_c0_seq1;comp123400_c0_seq1;comp125932_c0_seq2;comp135196_c0_seq10;comp127328_c0_seq4;co…	56
ko01051,Biosynthesis of ansamycins	Metabolism\Metabolism of terpenoids and polyketides	comp111871_c0_seq1;	1
ko04744,Phototransduction	Organismal Systems\Sensory system	comp124779_c2_seq2;comp15064_c0_seq1;comp81163_c0_seq2;comp103084_c0_seq1;comp104565_c0_seq1;comp116486_c0_seq2;comp117960_c0_seq1;comp125266_c0_seq6;comp134642_c0_seq2;comp164180_c0_seq1;comp133821_c0_seq1;	11
ko04712,Circadian rhythm - plant	Organismal Systems\Environmental adaptation	comp121174_c0_seq2;comp80806_c0_seq1;comp133561_c0_seq12;	3
ko04211,Longevity regulating pathway - mammal	Organismal Systems\Aging	comp50097_c0_seq1;comp94590_c0_seq1;comp117192_c0_seq1;comp132702_c0_seq3;comp134550_c0_seq8;comp135037_c0_seq12;comp142807_c0_seq1;comp123862_c0_seq6;comp129465_c1_seq1;comp129867_c1_seq13;comp125932_c0_seq2;comp135196_c0_seq10;comp127328_c0_seq4;comp125450_c0_seq1;comp131187_c0_seq19;comp110306_c0_seq1;comp118155_c0_seq2;comp125268_c1_seq1;comp143129_c0_seq1;comp131247_c0_seq6;comp114370_c0_seq…	66
ko00534,Glycosaminoglycan biosynthesis - heparan sulfate / heparin	Metabolism\Glycan biosynthesis and metabolism	comp134427_c1_seq1;comp125755_c1_seq3;comp120380_c0_seq1;comp120911_c0_seq9;comp122391_c0_seq1;comp125849_c0_seq1;comp117319_c0_seq1;comp101940_c0_seq2;comp134846_c0_seq18;comp106638_c0_seq1;comp116179_c0_seq7;comp125271_c0_seq3;comp127325_c0_seq1;comp125208_c0_seq2;comp121782_c0_seq1;comp103711_c0_seq15;comp116209_c0_seq4;	17
ko04932,Non-alcoholic fatty liver disease (NAFLD)	Human Diseases\Endocrine and metabolic diseases	comp123400_c0_seq1;comp50097_c0_seq1;comp94590_c0_seq1;comp117192_c0_seq1;comp132702_c0_seq3;comp134550_c0_seq8;comp135037_c0_seq12;comp142807_c0_seq1;comp123862_c0_seq6;comp125932_c0_seq2;comp135196_c0_seq10;comp127328_c0_seq4;comp125450_c0_seq1;comp94045_c0_seq1;comp146137_c0_seq1;comp11098_c0_seq1;comp118878_c1_seq11;comp115337_c0_seq1;comp117357_c0_seq3;comp116944_c0_seq1;comp116944_c1_seq2;c…	145
ko04622,RIG-I-like receptor signaling pathway	Organismal Systems\Immune system	comp125921_c0_seq2;comp131813_c0_seq5;comp130337_c0_seq1;comp129098_c0_seq1;comp123400_c0_seq1;comp117864_c0_seq1;comp125572_c0_seq7;comp113693_c0_seq2;comp131111_c0_seq1;comp122959_c0_seq1;comp116098_c0_seq6;comp133252_c0_seq8;comp124252_c0_seq1;comp92530_c0_seq1;comp101970_c0_seq1;comp107795_c0_seq3;comp108388_c0_seq1;comp126939_c0_seq1;	18
ko04921,Oxytocin signaling pathway	Organismal Systems\Endocrine system	comp93663_c0_seq1;comp110926_c0_seq1;comp121285_c0_seq3;comp129465_c1_seq1;comp129867_c1_seq13;comp115139_c0_seq4;comp98858_c0_seq1;comp68410_c0_seq1;comp68410_c1_seq1;comp118835_c0_seq1;comp112504_c0_seq2;comp130217_c0_seq1;comp135827_c0_seq1;comp37869_c0_seq1;comp47854_c0_seq1;comp52471_c0_seq1;comp67196_c0_seq1;comp67651_c0_seq1;comp79068_c0_seq1;comp107395_c0_seq2;comp108349_c0_seq1;comp10834…	135
ko04068,FoxO signaling pathway	Environmental Information Processing\Signal transduction	comp122978_c1_seq1;comp126226_c0_seq1;comp107639_c0_seq5;comp114307_c0_seq2;comp93124_c0_seq1;comp117186_c0_seq1;comp126391_c0_seq6;comp133683_c0_seq1;comp171322_c0_seq1;comp119670_c0_seq22;comp41601_c0_seq1;comp124240_c0_seq3;comp127670_c2_seq1;comp131925_c0_seq1;comp133537_c0_seq10;comp109498_c0_seq3;comp113981_c0_seq1;comp128411_c1_seq1;comp104143_c0_seq4;comp116402_c0_seq1;comp122959_c0_seq1;…	90
ko04971,Gastric acid secretion	Organismal Systems\Digestive system	comp115708_c0_seq24;comp93663_c0_seq1;comp110926_c0_seq1;comp121285_c0_seq3;comp116374_c0_seq9;comp131553_c0_seq1;comp129704_c0_seq3;comp134353_c0_seq3;comp15064_c0_seq1;comp81163_c0_seq2;comp103084_c0_seq1;comp104565_c0_seq1;comp116486_c0_seq2;comp117960_c0_seq1;comp125266_c0_seq6;comp134642_c0_seq2;comp164180_c0_seq1;comp114498_c0_seq27;comp86769_c0_seq1;comp53062_c0_seq2;comp131187_c0_seq19;co…	43
ko05143,African trypanosomiasis	Human Diseases\Infectious diseases	comp119490_c0_seq1;comp124311_c0_seq1;comp126419_c0_seq1;comp93663_c0_seq1;comp110926_c0_seq1;comp121285_c0_seq3;comp116374_c0_seq9;comp131553_c0_seq1;comp129704_c0_seq3;	9
ko04141,Protein processing in endoplasmic reticulum	Genetic Information Processing\Folding, sorting and degradation	comp123728_c0_seq1;comp106588_c0_seq1;comp84580_c0_seq1;comp132370_c1_seq1;comp132235_c0_seq2;comp105468_c0_seq1;comp127317_c0_seq2;comp88649_c0_seq1;comp125785_c0_seq1;comp131170_c0_seq1;comp53016_c0_seq1;comp121590_c0_seq1;comp134778_c0_seq2;comp122158_c0_seq7;comp130868_c0_seq1;comp133713_c0_seq1;comp103432_c0_seq1;comp130284_c0_seq1;comp110936_c0_seq1;comp135538_c0_seq1;comp131665_c0_seq2;com…	172
ko00051,Fructose and mannose metabolism	Metabolism\Carbohydrate metabolism	comp128764_c1_seq1;comp100489_c0_seq3;comp114453_c0_seq1;comp122890_c0_seq2;comp130113_c0_seq2;comp132004_c0_seq2;comp54767_c0_seq1;comp76811_c0_seq1;comp102252_c0_seq1;comp102252_c2_seq1;comp110997_c0_seq1;comp122735_c0_seq5;comp129408_c0_seq1;comp135675_c0_seq4;comp115598_c0_seq2;comp117934_c0_seq1;comp134591_c0_seq2;comp125829_c0_seq15;comp105063_c0_seq1;comp103467_c0_seq2;comp132444_c3_seq6;c…	47
ko04530,Tight junction	Cellular Processes\Cellular community - eukaryotes	comp102826_c0_seq2;comp120346_c0_seq11;comp133723_c0_seq23;comp140144_c0_seq1;comp82174_c0_seq1;comp89742_c0_seq1;comp119876_c0_seq1;comp121954_c0_seq1;comp132738_c0_seq3;comp53068_c0_seq1;comp117852_c1_seq7;comp124808_c0_seq4;comp122215_c1_seq1;comp133293_c0_seq4;comp133293_c1_seq1;comp128794_c0_seq1;comp134616_c1_seq34;comp108183_c0_seq2;comp69733_c0_seq2;comp79138_c0_seq1;comp125510_c1_seq1;co…	155
ko04370,VEGF signaling pathway	Environmental Information Processing\Signal transduction	comp126462_c1_seq4;comp129704_c0_seq3;comp128567_c0_seq3;comp129465_c1_seq1;comp129867_c1_seq13;comp115139_c0_seq4;comp98858_c0_seq1;comp68410_c0_seq1;comp68410_c1_seq1;comp118835_c0_seq1;comp94305_c0_seq4;comp113748_c0_seq1;comp112504_c0_seq2;comp130217_c0_seq1;comp51726_c0_seq1;comp127569_c0_seq2;comp128812_c1_seq31;comp82174_c0_seq1;comp89742_c0_seq1;comp119876_c0_seq1;comp121954_c0_seq1;comp1…	34
ko04080,Neuroactive ligand-receptor interaction	Environmental Information Processing\Signaling molecules and interaction	comp115708_c0_seq24;comp88198_c0_seq1;comp65963_c0_seq1;comp104623_c0_seq1;comp46396_c0_seq1;comp62477_c0_seq2;comp133016_c0_seq4;comp137576_c0_seq1;comp89847_c0_seq1;comp93779_c0_seq2;comp122639_c0_seq3;comp131189_c0_seq2;comp132366_c0_seq38;comp127502_c0_seq3;comp130547_c0_seq3;comp60148_c0_seq2;comp111851_c0_seq1;comp38781_c0_seq1;comp50937_c0_seq1;comp123470_c1_seq1;comp131192_c0_seq1;comp514…	104
ko04923,Regulation of lipolysis in adipocyte	Organismal Systems\Endocrine system	comp135458_c1_seq3;comp53062_c0_seq2;comp131187_c0_seq19;comp110306_c0_seq1;comp118155_c0_seq2;comp125268_c1_seq1;comp143129_c0_seq1;comp131247_c0_seq6;comp114370_c0_seq1;comp130573_c0_seq8;comp131291_c0_seq1;comp122789_c0_seq11;comp94298_c1_seq1;comp118746_c0_seq3;comp124530_c0_seq3;comp129749_c0_seq2;comp130843_c1_seq300;comp133833_c0_seq4;comp70398_c0_seq2;comp105365_c0_seq2;comp110791_c0_seq7…	39
ko00230,Purine metabolism	Metabolism\Nucleotide metabolism	comp131735_c0_seq1;comp112288_c0_seq4;comp131365_c0_seq1;comp158676_c0_seq1;comp109700_c0_seq1;comp113764_c0_seq2;comp130471_c0_seq1;comp132703_c0_seq1;comp134224_c1_seq1;comp129161_c0_seq11;comp99836_c0_seq1;comp120282_c0_seq2;comp116186_c0_seq1;comp16828_c0_seq2;comp131231_c0_seq2;comp130116_c0_seq5;comp130310_c1_seq1;comp131543_c1_seq10;comp54192_c0_seq1;comp97149_c0_seq1;comp123271_c0_seq1;co…	168
ko04120,Ubiquitin mediated proteolysis	Genetic Information Processing\Folding, sorting and degradation	comp117801_c0_seq1;comp111643_c0_seq1;comp86776_c0_seq1;comp129593_c0_seq1;comp59674_c0_seq1;comp125804_c0_seq1;comp162961_c0_seq1;comp103832_c0_seq1;comp53419_c0_seq1;comp55921_c0_seq1;comp115981_c0_seq1;comp111723_c0_seq1;comp104917_c0_seq1;comp131865_c1_seq1;comp114466_c1_seq1;comp112619_c0_seq3;comp121277_c0_seq1;comp112729_c0_seq1;comp92870_c0_seq1;comp125016_c0_seq1;comp114718_c0_seq1;comp1…	119
ko00965,Betalain biosynthesis	Metabolism\Biosynthesis of other secondary metabolites	comp42567_c0_seq1;comp83004_c0_seq1;comp117513_c0_seq1;comp105463_c0_seq1;comp147747_c0_seq1;	5
ko00450,Selenocompound metabolism	Metabolism\Metabolism of other amino acids	comp124032_c0_seq2;comp98057_c0_seq1;comp103757_c0_seq1;comp124727_c0_seq2;comp129960_c0_seq4;comp129973_c1_seq1;comp105171_c0_seq1;comp126627_c0_seq2;comp109573_c0_seq1;comp128247_c0_seq1;comp84037_c0_seq1;comp123144_c0_seq1;	12
ko04060,Cytokine-cytokine receptor interaction	Environmental Information Processing\Signaling molecules and interaction	comp115461_c0_seq1;comp165289_c0_seq1;comp122533_c0_seq1;comp100088_c0_seq1;comp116083_c0_seq12;comp130035_c0_seq13;comp130354_c0_seq4;comp130815_c0_seq1;comp133410_c0_seq3;comp134655_c0_seq29;comp128862_c0_seq4;comp122978_c1_seq1;comp108472_c0_seq2;comp130816_c0_seq1;comp109079_c0_seq1;	15
ko04520,Adherens junction	Cellular Processes\Cellular community - eukaryotes	comp128527_c0_seq121;comp98476_c0_seq1;comp133677_c1_seq142;comp119186_c0_seq7;comp82174_c0_seq1;comp89742_c0_seq1;comp119876_c0_seq1;comp121954_c0_seq1;comp132738_c0_seq3;comp69733_c0_seq2;comp79138_c0_seq1;comp125510_c1_seq1;comp133044_c0_seq1;comp100880_c0_seq1;comp125822_c0_seq7;comp134769_c0_seq1;comp128417_c0_seq3;comp127158_c0_seq1;comp110122_c0_seq1;comp116145_c0_seq3;comp132218_c0_seq20;…	90
ko05033,Nicotine addiction	Human Diseases\Substance dependence	comp48393_c0_seq1;comp50622_c0_seq1;comp121216_c0_seq6;comp125799_c0_seq1;comp158929_c0_seq1;comp64083_c0_seq1;comp73074_c0_seq1;comp104720_c0_seq1;comp119436_c0_seq1;comp123839_c1_seq3;comp130305_c0_seq4;comp131544_c0_seq10;comp132055_c0_seq1;comp53028_c0_seq1;comp65972_c0_seq1;comp96648_c0_seq2;comp117449_c0_seq2;comp120104_c0_seq11;comp32793_c0_seq1;comp124941_c0_seq13;comp137748_c0_seq1;comp1…	23
ko05410,Hypertrophic cardiomyopathy (HCM)	Human Diseases\Cardiovascular diseases	comp88228_c0_seq1;comp114058_c0_seq3;comp116792_c0_seq1;comp122309_c1_seq16;comp125874_c0_seq1;comp130927_c1_seq2;comp152004_c0_seq1;comp123770_c0_seq3;comp127593_c0_seq1;comp129874_c0_seq19;comp42686_c0_seq1;comp47174_c0_seq1;comp49314_c0_seq2;comp49327_c0_seq2;comp51870_c0_seq1;comp64597_c0_seq2;comp65285_c0_seq1;comp79883_c0_seq1;comp80594_c0_seq1;comp80594_c1_seq1;comp83237_c0_seq1;comp85647_…	104
ko04659,Th17 cell differentiation	Organismal Systems\Immune system	comp116098_c0_seq6;comp135719_c0_seq1;comp122978_c1_seq1;comp107639_c0_seq5;comp126226_c0_seq1;comp105904_c0_seq1;comp113691_c0_seq1;comp22441_c0_seq1;comp106945_c0_seq1;comp116959_c1_seq2;comp118824_c0_seq1;comp118824_c2_seq2;comp132513_c0_seq3;comp142063_c0_seq1;comp143863_c0_seq1;comp146417_c0_seq1;comp170344_c0_seq1;comp126462_c1_seq4;comp94305_c0_seq4;comp113748_c0_seq1;comp130337_c0_seq1;co…	29
ko05034,Alcoholism	Human Diseases\Substance dependence	comp122409_c0_seq5;comp105463_c0_seq1;comp147747_c0_seq1;comp28070_c0_seq1;comp131364_c0_seq5;comp102236_c0_seq1;comp53028_c0_seq1;comp65972_c0_seq1;comp96648_c0_seq2;comp117449_c0_seq2;comp120104_c0_seq11;comp32793_c0_seq1;comp124941_c0_seq13;comp137748_c0_seq1;comp138748_c0_seq1;comp152896_c0_seq1;comp122253_c0_seq1;comp130271_c0_seq1;comp118665_c0_seq20;comp107733_c0_seq2;comp123510_c0_seq3;co…	69
ko04664,Fc epsilon RI signaling pathway	Organismal Systems\Immune system	comp126462_c1_seq4;comp129704_c0_seq3;comp125932_c0_seq2;comp135196_c0_seq10;comp127328_c0_seq4;comp127110_c0_seq14;comp125450_c0_seq1;comp69733_c0_seq2;comp79138_c0_seq1;comp125510_c1_seq1;comp133044_c0_seq1;comp127901_c0_seq6;comp131252_c0_seq2;comp116805_c0_seq2;comp122959_c0_seq1;comp116098_c0_seq6;comp123247_c0_seq4;comp128813_c0_seq3;comp110195_c0_seq1;comp129465_c1_seq1;comp129867_c1_seq13…	27
ko05215,Prostate cancer	Human Diseases\Cancers	comp135922_c0_seq1;comp113585_c0_seq1;comp111945_c0_seq1;comp133914_c1_seq2;comp132679_c0_seq1;comp128862_c0_seq4;comp125932_c0_seq2;comp135196_c0_seq10;comp127328_c0_seq4;comp121028_c0_seq2;comp131746_c5_seq2;comp127110_c0_seq14;comp125450_c0_seq1;comp133537_c0_seq10;comp94045_c0_seq1;comp146137_c0_seq1;comp108518_c0_seq1;comp125091_c0_seq1;comp126135_c1_seq1;comp127846_c0_seq1;comp109498_c0_seq…	48
ko03420,Nucleotide excision repair	Genetic Information Processing\Replication and repair	comp53457_c0_seq1;comp110460_c0_seq1;comp134153_c0_seq1;comp129262_c1_seq2;comp134832_c0_seq1;comp122585_c0_seq1;comp114359_c0_seq3;comp126639_c0_seq3;comp123169_c0_seq1;comp87608_c0_seq1;comp123884_c0_seq1;comp117436_c0_seq1;comp136731_c0_seq1;comp123282_c0_seq1;comp114601_c0_seq1;comp147134_c0_seq1;comp116410_c0_seq2;comp93082_c0_seq1;comp107777_c0_seq8;comp135629_c0_seq1;comp122435_c0_seq3;com…	39
ko05217,Basal cell carcinoma	Human Diseases\Cancers	comp39758_c0_seq1;comp51614_c0_seq1;comp91872_c0_seq1;comp91872_c1_seq1;comp126190_c0_seq4;comp87288_c0_seq1;comp89647_c0_seq1;comp118642_c0_seq1;comp109553_c0_seq1;comp66833_c0_seq1;comp116942_c0_seq1;comp128437_c0_seq1;comp169308_c0_seq1;comp68150_c0_seq1;comp3993_c0_seq1;comp50827_c0_seq1;comp110996_c1_seq2;comp157687_c0_seq1;comp91391_c0_seq1;comp78008_c0_seq1;comp124647_c0_seq1;comp63691_c0_…	37
ko00254,Aflatoxin biosynthesis	Metabolism\Biosynthesis of other secondary metabolites	comp132667_c0_seq7;	1
ko00515,Mannose type O-glycan biosyntheis	Metabolism\Glycan biosynthesis and metabolism	comp105351_c0_seq3;comp114996_c0_seq1;comp115018_c1_seq2;comp119650_c0_seq2;comp127554_c1_seq2;comp127554_c2_seq3;comp34431_c0_seq1;comp46229_c0_seq1;comp46819_c0_seq1;comp67816_c0_seq1;comp103051_c1_seq1;comp104694_c0_seq2;comp113543_c0_seq1;comp115976_c0_seq6;comp116970_c0_seq1;comp122248_c0_seq1;comp123343_c0_seq2;comp126566_c1_seq2;comp127471_c0_seq7;comp128026_c0_seq1;comp131751_c0_seq56;com…	49
ko04140,Autophagy - animal	Cellular Processes\Transport and catabolism	comp123862_c0_seq6;comp125932_c0_seq2;comp135196_c0_seq10;comp127328_c0_seq4;comp127110_c0_seq14;comp125450_c0_seq1;comp121028_c0_seq2;comp131746_c5_seq2;comp129465_c1_seq1;comp129867_c1_seq13;comp108352_c0_seq1;comp119643_c0_seq1;comp115139_c0_seq4;comp98858_c0_seq1;comp113691_c0_seq1;comp134860_c0_seq4;comp119277_c1_seq1;comp135328_c0_seq1;comp121614_c0_seq6;comp135719_c0_seq1;comp120497_c0_seq…	115
ko00983,Drug metabolism - other enzymes	Metabolism\Xenobiotics biodegradation and metabolism	comp126165_c1_seq1;comp124351_c0_seq2;comp113814_c0_seq1;comp97429_c0_seq1;comp127032_c0_seq1;comp128936_c0_seq4;comp51833_c0_seq1;comp54574_c0_seq1;comp119158_c0_seq2;comp127725_c0_seq1;comp130235_c0_seq7;comp130524_c0_seq1;comp138545_c0_seq1;comp139508_c0_seq1;comp140652_c0_seq1;comp130108_c0_seq1;comp121390_c0_seq6;comp132210_c0_seq5;comp106978_c0_seq1;comp114391_c0_seq1;comp117540_c0_seq4;com…	46
ko04350,TGF-beta signaling pathway	Environmental Information Processing\Signal transduction	comp126705_c0_seq4;comp132321_c0_seq4;comp66833_c0_seq1;comp116942_c0_seq1;comp128437_c0_seq1;comp169308_c0_seq1;comp122533_c0_seq1;comp165289_c0_seq1;comp130816_c0_seq1;comp109079_c0_seq1;comp108472_c0_seq2;comp122978_c1_seq1;comp132689_c1_seq2;comp53390_c0_seq1;comp72044_c0_seq1;comp125211_c0_seq1;comp107639_c0_seq5;comp126226_c0_seq1;comp120438_c1_seq6;comp53902_c0_seq1;comp127306_c1_seq7;comp…	45
ko05200,Pathways in cancer	Human Diseases\Cancers	comp122281_c0_seq4;comp127846_c0_seq1;comp7426_c0_seq1;comp115013_c1_seq5;comp119899_c0_seq2;comp123385_c0_seq7;comp133442_c0_seq1;comp119269_c0_seq1;comp135412_c0_seq2;comp94045_c0_seq1;comp146137_c0_seq1;comp124993_c0_seq2;comp131935_c0_seq2;comp98289_c0_seq1;comp117123_c0_seq3;comp68150_c0_seq1;comp3993_c0_seq1;comp50827_c0_seq1;comp110996_c1_seq2;comp157687_c0_seq1;comp91391_c0_seq1;comp78008…	222
ko05020,Prion diseases	Human Diseases\Neurodegenerative diseases	comp103432_c0_seq1;comp130284_c0_seq1;comp75945_c0_seq1;comp119804_c0_seq7;comp134391_c0_seq1;comp5737_c0_seq1;comp98706_c0_seq1;comp105620_c0_seq1;comp124269_c0_seq4;comp125838_c2_seq1;comp122789_c0_seq11;comp44186_c0_seq1;comp80065_c0_seq1;comp103389_c0_seq3;comp121416_c0_seq18;comp135339_c0_seq1;comp115139_c0_seq4;comp98858_c0_seq1;comp86942_c0_seq1;comp115871_c1_seq3;comp134195_c1_seq2;comp13…	23
ko05016,Huntington's disease	Human Diseases\Neurodegenerative diseases	comp119584_c0_seq2;comp109185_c0_seq2;comp130576_c0_seq5;comp127748_c2_seq2;comp120942_c0_seq1;comp129352_c0_seq1;comp54334_c0_seq1;comp130862_c0_seq3;comp126212_c0_seq2;comp131813_c0_seq5;comp108519_c0_seq5;comp93663_c0_seq1;comp110926_c0_seq1;comp121285_c0_seq3;comp116374_c0_seq9;comp131553_c0_seq1;comp53028_c0_seq1;comp65972_c0_seq1;comp96648_c0_seq2;comp117449_c0_seq2;comp120104_c0_seq11;comp…	234
ko01212,Fatty acid metabolism	Metabolism\Overview	comp132667_c0_seq7;comp112328_c0_seq1;comp127500_c0_seq1;comp132296_c0_seq1;comp127637_c0_seq1;comp127637_c1_seq2;comp57298_c0_seq1;comp117240_c0_seq1;comp118008_c0_seq3;comp144886_c0_seq1;comp128696_c0_seq3;comp118800_c2_seq1;comp132363_c0_seq1;comp39237_c0_seq1;comp150291_c0_seq1;comp113963_c0_seq1;comp15023_c0_seq1;comp122170_c0_seq1;comp61857_c0_seq1;comp63718_c0_seq1;comp70312_c0_seq1;comp11…	58
ko00740,Riboflavin metabolism	Metabolism\Metabolism of cofactors and vitamins	comp119242_c0_seq7;comp119865_c0_seq1;comp134573_c0_seq2;comp132653_c1_seq2;comp52188_c0_seq1;comp52188_c1_seq1;comp72551_c0_seq1;comp112824_c0_seq3;comp112932_c0_seq3;comp118272_c0_seq2;comp119373_c0_seq2;comp137749_c0_seq1;	12
ko00052,Galactose metabolism	Metabolism\Carbohydrate metabolism	comp133970_c0_seq1;comp134900_c0_seq8;comp130611_c1_seq10;comp82059_c0_seq3;comp119549_c0_seq2;comp125097_c0_seq4;comp124743_c0_seq1;comp131365_c0_seq1;comp158676_c0_seq1;comp109700_c0_seq1;comp117934_c0_seq1;comp134591_c0_seq2;comp117533_c0_seq1;comp130766_c0_seq2;comp2519_c0_seq1;comp130639_c0_seq18;comp131628_c0_seq1;comp132609_c0_seq1;comp173198_c0_seq1;comp45772_c0_seq1;comp47574_c0_seq1;com…	33
ko00970,Aminoacyl-tRNA biosynthesis	Genetic Information Processing\Translation	comp128793_c0_seq2;comp132041_c0_seq1;comp123224_c0_seq1;comp113592_c0_seq2;comp133329_c0_seq1;comp132948_c0_seq1;comp129185_c1_seq7;comp120753_c0_seq4;comp123495_c0_seq1;comp130223_c0_seq1;comp134372_c0_seq1;comp108902_c0_seq3;comp116922_c0_seq1;comp119847_c0_seq1;comp128247_c0_seq1;comp128598_c0_seq2;comp129124_c0_seq4;comp84037_c0_seq1;comp123144_c0_seq1;comp127777_c0_seq10;comp131834_c0_seq2;…	42
ko04975,Fat digestion and absorption	Organismal Systems\Digestive system	comp43930_c0_seq1;comp107027_c0_seq5;comp113700_c0_seq3;comp114467_c0_seq2;comp120913_c0_seq14;comp125010_c0_seq1;comp132569_c0_seq2;comp134511_c0_seq4;comp135766_c1_seq1;comp139669_c0_seq1;comp127397_c0_seq1;comp38327_c0_seq1;comp110160_c0_seq2;comp110342_c0_seq4;comp127165_c0_seq1;comp128330_c3_seq1;comp129542_c0_seq2;comp129894_c0_seq2;comp98132_c0_seq1;comp139152_c0_seq1;comp111149_c0_seq1;co…	34
ko05130,Pathogenic Escherichia coli infection	Human Diseases\Infectious diseases	comp38858_c0_seq1;comp13694_c0_seq1;comp25525_c0_seq1;comp39114_c0_seq1;comp39718_c0_seq1;comp67459_c0_seq1;comp71739_c0_seq1;comp76428_c0_seq1;comp85989_c0_seq1;comp101510_c0_seq1;comp102165_c1_seq1;comp103256_c0_seq3;comp106519_c1_seq1;comp115500_c0_seq1;comp115500_c1_seq1;comp115826_c0_seq1;comp116859_c0_seq3;comp120475_c0_seq2;comp122488_c0_seq4;comp127098_c0_seq1;comp137566_c0_seq1;comp15003…	93
ko05216,Thyroid cancer	Human Diseases\Cancers	comp128851_c1_seq1;comp134470_c0_seq2;comp130501_c0_seq2;comp129465_c1_seq1;comp129867_c1_seq13;comp103042_c0_seq1;comp115139_c0_seq4;comp98858_c0_seq1;comp11098_c0_seq1;comp118878_c1_seq11;comp127846_c0_seq1;comp124993_c0_seq2;comp98289_c0_seq1;comp117123_c0_seq3;	14
ko04810,Regulation of actin cytoskeleton	Cellular Processes\Cell motility	comp50937_c0_seq1;comp125464_c0_seq3;comp128862_c0_seq4;comp132679_c0_seq1;comp88228_c0_seq1;comp114058_c0_seq3;comp116792_c0_seq1;comp122309_c1_seq16;comp125874_c0_seq1;comp130927_c1_seq2;comp152004_c0_seq1;comp115708_c0_seq24;comp124663_c0_seq4;comp132289_c0_seq1;comp51726_c0_seq1;comp127569_c0_seq2;comp128834_c0_seq2;comp126201_c0_seq1;comp135513_c0_seq7;comp98476_c0_seq1;comp133677_c1_seq142;…	124
ko03060,Protein export	Genetic Information Processing\Folding, sorting and degradation	comp108761_c0_seq1;comp120627_c1_seq1;comp123728_c0_seq1;comp106588_c0_seq1;comp84580_c0_seq1;comp132370_c1_seq1;comp132235_c0_seq2;comp103432_c0_seq1;comp130284_c0_seq1;comp125299_c0_seq1;comp132259_c0_seq1;comp114697_c0_seq2;comp87006_c0_seq1;comp122705_c0_seq1;comp133631_c0_seq1;comp111007_c0_seq1;comp107172_c0_seq1;comp90566_c0_seq1;comp118449_c0_seq1;comp161861_c0_seq1;comp127070_c0_seq1;com…	22
ko05323,Rheumatoid arthritis	Human Diseases\Immune diseases	comp38858_c0_seq1;comp135827_c0_seq1;comp121084_c0_seq1;comp56944_c0_seq1;comp128162_c0_seq1;comp154845_c0_seq1;comp118027_c0_seq1;comp39195_c0_seq1;comp105135_c0_seq1;comp99332_c0_seq1;comp83909_c0_seq1;comp107750_c0_seq1;comp129155_c0_seq2;comp93473_c0_seq4;comp120710_c0_seq1;comp130740_c1_seq7;comp109972_c0_seq1;comp109828_c0_seq2;comp122835_c0_seq1;comp108226_c0_seq1;comp115623_c0_seq1;comp14…	41
ko04390,Hippo signaling pathway	Environmental Information Processing\Signal transduction	comp124676_c0_seq1;comp128527_c0_seq121;comp53068_c0_seq1;comp128794_c0_seq1;comp117852_c1_seq7;comp124808_c0_seq4;comp130777_c0_seq8;comp129533_c0_seq1;comp134975_c0_seq1;comp125054_c1_seq3;comp137144_c0_seq1;comp134876_c0_seq1;comp130675_c0_seq2;comp119177_c0_seq3;comp112351_c0_seq1;comp132626_c2_seq4;comp115387_c0_seq4;comp105997_c1_seq4;comp68789_c0_seq1;comp92379_c0_seq1;comp120234_c0_seq3;c…	113
ko04013,MAPK signaling pathway - fly	Environmental Information Processing\Signal transduction	comp119834_c2_seq5;comp125194_c0_seq1;comp134005_c0_seq1;comp135069_c0_seq1;comp106470_c0_seq5;comp116762_c0_seq1;comp128862_c0_seq4;comp4289_c0_seq1;comp130839_c0_seq3;comp121226_c0_seq1;comp91528_c0_seq4;comp106604_c0_seq1;comp131106_c0_seq3;comp116119_c0_seq1;comp128813_c0_seq3;comp126646_c0_seq2;comp122380_c1_seq3;comp110195_c0_seq1;comp70713_c1_seq1;comp129465_c1_seq1;comp129867_c1_seq13;com…	145
ko04392,Hippo signaling pathway - multiple species	Environmental Information Processing\Signal transduction	comp45523_c0_seq1;comp51570_c0_seq1;comp59856_c0_seq1;comp64436_c0_seq1;comp64436_c1_seq1;comp68415_c0_seq1;comp106554_c0_seq1;comp116848_c0_seq1;comp119940_c0_seq1;comp141275_c0_seq1;comp148932_c0_seq1;comp54745_c0_seq1;comp140582_c0_seq1;comp125540_c0_seq1;comp134975_c0_seq1;comp125054_c1_seq3;comp137144_c0_seq1;comp119177_c0_seq3;comp130675_c0_seq2;comp134876_c0_seq1;comp68789_c0_seq1;comp9237…	33
ko04912,GnRH signaling pathway	Organismal Systems\Endocrine system	comp88455_c0_seq3;comp94693_c0_seq1;comp119803_c0_seq1;comp131470_c0_seq3;comp53062_c0_seq2;comp131187_c0_seq19;comp110306_c0_seq1;comp118155_c0_seq2;comp125268_c1_seq1;comp143129_c0_seq1;comp131247_c0_seq6;comp114370_c0_seq1;comp130573_c0_seq8;comp131291_c0_seq1;comp122789_c0_seq11;comp108518_c0_seq1;comp93663_c0_seq1;comp110926_c0_seq1;comp121285_c0_seq3;comp116374_c0_seq9;comp131553_c0_seq1;co…	74
ko04973,Carbohydrate digestion and absorption	Organismal Systems\Digestive system	comp52081_c0_seq1;comp110171_c0_seq3;comp110245_c0_seq1;comp121604_c0_seq1;comp127995_c0_seq1;comp169092_c0_seq1;comp45772_c0_seq1;comp47574_c0_seq1;comp48550_c0_seq1;comp126818_c0_seq7;comp132315_c0_seq1;comp132731_c0_seq10;comp134314_c0_seq5;comp117171_c1_seq3;comp121757_c0_seq1;comp124835_c0_seq2;comp78875_c0_seq7;comp102019_c0_seq1;comp107556_c0_seq1;comp112206_c0_seq4;comp113972_c0_seq3;comp…	35
ko05218,Melanoma	Human Diseases\Cancers	comp125464_c0_seq3;comp128862_c0_seq4;comp129465_c1_seq1;comp129867_c1_seq13;comp103042_c0_seq1;comp115139_c0_seq4;comp98858_c0_seq1;comp125932_c0_seq2;comp135196_c0_seq10;comp127328_c0_seq4;comp125450_c0_seq1;comp121028_c0_seq2;comp131746_c5_seq2;comp133537_c0_seq10;comp126912_c1_seq10;comp133914_c1_seq2;comp122650_c0_seq2;	17
ko00250,Alanine, aspartate and glutamate metabolism	Metabolism\Amino acid metabolism	comp128218_c0_seq1;comp98132_c0_seq1;comp139152_c0_seq1;comp123534_c0_seq24;comp15129_c0_seq1;comp114537_c0_seq2;comp128942_c0_seq1;comp120141_c0_seq1;comp120141_c1_seq1;comp120141_c2_seq1;comp139419_c0_seq1;comp116880_c0_seq1;comp108332_c0_seq1;comp126848_c0_seq2;comp130029_c2_seq1;comp127578_c0_seq1;comp120282_c0_seq2;comp121860_c0_seq3;comp125128_c0_seq1;comp121569_c0_seq3;comp128209_c0_seq4;c…	42
ko00062,Fatty acid elongation	Metabolism\Lipid metabolism	comp118800_c2_seq1;comp132363_c0_seq1;comp39237_c0_seq1;comp150291_c0_seq1;comp15023_c0_seq1;comp122170_c0_seq1;comp113963_c0_seq1;comp127637_c0_seq1;comp127637_c1_seq2;comp57298_c0_seq1;comp117240_c0_seq1;comp118008_c0_seq3;comp144886_c0_seq1;comp119415_c1_seq1;comp119292_c1_seq1;comp73263_c1_seq1;comp110935_c0_seq5;comp124924_c0_seq1;comp112665_c0_seq1;comp113095_c0_seq1;comp125277_c0_seq1;comp…	30
ko00561,Glycerolipid metabolism	Metabolism\Lipid metabolism	comp134272_c0_seq1;comp50612_c0_seq1;comp106760_c0_seq1;comp113029_c0_seq1;comp113224_c0_seq1;comp128120_c0_seq1;comp129950_c1_seq1;comp132101_c0_seq4;comp135684_c1_seq4;comp129394_c0_seq1;comp130399_c0_seq1;comp56908_c0_seq1;comp118612_c0_seq1;comp119777_c2_seq1;comp120429_c0_seq2;comp123835_c0_seq2;comp127885_c0_seq1;comp126939_c0_seq1;comp129387_c0_seq14;comp132127_c0_seq3;comp132127_c1_seq1;c…	56
ko00630,Glyoxylate and dicarboxylate metabolism	Metabolism\Carbohydrate metabolism	comp72618_c0_seq1;comp123555_c0_seq1;comp163820_c0_seq1;comp103767_c0_seq1;comp112469_c0_seq1;comp114555_c0_seq1;comp125597_c0_seq1;comp128696_c0_seq3;comp119365_c0_seq1;comp135141_c0_seq1;comp113893_c0_seq2;comp125189_c3_seq2;comp95955_c0_seq2;comp11549_c0_seq1;comp119594_c1_seq4;comp128248_c0_seq1;comp150763_c0_seq1;comp133999_c0_seq20;comp104295_c0_seq1;comp121750_c0_seq13;comp120141_c0_seq1;c…	45
ko04070,Phosphatidylinositol signaling system	Environmental Information Processing\Signal transduction	comp40242_c0_seq1;comp110597_c0_seq2;comp110597_c1_seq1;comp110597_c2_seq2;comp124771_c0_seq2;comp123480_c0_seq2;comp134072_c1_seq3;comp134354_c0_seq24;comp119672_c0_seq2;comp125725_c1_seq2;comp125932_c0_seq2;comp135196_c0_seq10;comp127328_c0_seq4;comp121028_c0_seq2;comp131746_c5_seq2;comp87431_c0_seq1;comp97981_c0_seq1;comp141409_c0_seq1;comp141862_c0_seq1;comp134425_c0_seq16;comp133540_c0_seq8;…	72
ko05162,Measles	Human Diseases\Infectious diseases	comp127328_c0_seq4;comp125932_c0_seq2;comp135196_c0_seq10;comp125450_c0_seq1;comp94045_c0_seq1;comp146137_c0_seq1;comp131606_c1_seq17;comp125921_c0_seq2;comp119490_c0_seq1;comp127007_c0_seq1;comp125986_c0_seq1;comp130337_c0_seq1;comp38858_c0_seq1;comp113693_c0_seq2;comp117864_c0_seq1;comp125572_c0_seq7;comp129098_c0_seq1;comp123400_c0_seq1;comp121174_c0_seq2;comp80806_c0_seq1;comp14233_c0_seq1;co…	61
ko02024,Quorum sensing	Cellular Processes\Cellular community - prokaryotes	comp121860_c0_seq3;comp125128_c0_seq1;comp114377_c0_seq1;comp130054_c0_seq11;comp131818_c0_seq5;comp134099_c0_seq1;comp171333_c0_seq1;comp108761_c0_seq1;comp120627_c1_seq1;	9
ko00650,Butanoate metabolism	Metabolism\Carbohydrate metabolism	comp128696_c0_seq3;comp39237_c0_seq1;comp150291_c0_seq1;comp15023_c0_seq1;comp122170_c0_seq1;comp113963_c0_seq1;comp122249_c0_seq1;comp120012_c0_seq6;comp129594_c0_seq1;comp121860_c0_seq3;comp125128_c0_seq1;comp121569_c0_seq3;comp128209_c0_seq4;comp133612_c0_seq8;comp65996_c0_seq1;comp65996_c1_seq1;comp119581_c0_seq2;comp135555_c0_seq5;comp118403_c0_seq5;comp131292_c3_seq4;comp135443_c0_seq3;comp…	28
ko00073,Cutin, suberine and wax biosynthesis	Metabolism\Lipid metabolism	comp122509_c1_seq1;comp128522_c0_seq1;comp153779_c0_seq1;	3
ko03015,mRNA surveillance pathway	Genetic Information Processing\Translation	comp121438_c0_seq2;comp128270_c0_seq2;comp121293_c0_seq1;comp54063_c0_seq1;comp89072_c0_seq1;comp119313_c0_seq3;comp7362_c0_seq1;comp135621_c1_seq1;comp100731_c0_seq1;comp52235_c0_seq1;comp132564_c0_seq6;comp92330_c0_seq1;comp104324_c0_seq1;comp115049_c0_seq1;comp117008_c0_seq1;comp121783_c0_seq1;comp125339_c1_seq1;comp131647_c0_seq2;comp135544_c0_seq1;comp98436_c0_seq2;comp53716_c0_seq1;comp1270…	84
ko00410,beta-Alanine metabolism	Metabolism\Metabolism of other amino acids	comp121860_c0_seq3;comp125128_c0_seq1;comp129177_c0_seq2;comp121569_c0_seq3;comp130382_c0_seq2;comp115169_c0_seq1;comp52343_c0_seq1;comp91987_c0_seq1;comp92051_c0_seq1;comp114654_c0_seq1;comp114844_c2_seq8;comp118676_c1_seq2;comp131908_c0_seq66;comp50612_c0_seq1;comp106760_c0_seq1;comp113029_c0_seq1;comp113224_c0_seq1;comp128120_c0_seq1;comp129950_c1_seq1;comp132101_c0_seq4;comp135684_c1_seq4;com…	33
ko05223,Non-small cell lung cancer	Human Diseases\Cancers	comp11098_c0_seq1;comp118878_c1_seq11;comp126912_c1_seq10;comp133914_c1_seq2;comp129465_c1_seq1;comp129867_c1_seq13;comp119177_c0_seq3;comp125932_c0_seq2;comp135196_c0_seq10;comp127328_c0_seq4;comp127110_c0_seq14;comp125450_c0_seq1;comp131621_c0_seq10;comp128862_c0_seq4;comp128813_c0_seq3;comp110195_c0_seq1;comp103042_c0_seq1;comp115139_c0_seq4;comp98858_c0_seq1;comp126462_c1_seq4;comp129704_c0_s…	24
ko05031,Amphetamine addiction	Human Diseases\Substance dependence	comp122409_c0_seq5;comp105463_c0_seq1;comp147747_c0_seq1;comp28070_c0_seq1;comp131364_c0_seq5;comp102236_c0_seq1;comp38328_c0_seq1;comp44342_c0_seq1;comp109217_c0_seq2;comp115735_c0_seq2;comp137249_c0_seq1;comp138265_c0_seq1;comp53028_c0_seq1;comp65972_c0_seq1;comp96648_c0_seq2;comp117449_c0_seq2;comp120104_c0_seq11;comp32793_c0_seq1;comp124941_c0_seq13;comp137748_c0_seq1;comp138748_c0_seq1;comp1…	50
ko00232,Caffeine metabolism	Metabolism\Biosynthesis of other secondary metabolites	comp51833_c0_seq1;comp54574_c0_seq1;comp119158_c0_seq2;comp127725_c0_seq1;comp130235_c0_seq7;comp130524_c0_seq1;comp138545_c0_seq1;comp139508_c0_seq1;comp140652_c0_seq1;comp40795_c0_seq1;	10
ko00350,Tyrosine metabolism	Metabolism\Amino acid metabolism	comp128218_c0_seq1;comp98132_c0_seq1;comp139152_c0_seq1;comp116839_c0_seq4;comp109487_c0_seq1;comp116559_c0_seq1;comp121662_c0_seq1;comp119787_c0_seq1;comp122398_c0_seq1;comp42567_c0_seq1;comp83004_c0_seq1;comp117513_c0_seq1;comp122409_c0_seq5;comp105463_c0_seq1;comp147747_c0_seq1;comp11973_c0_seq1;comp129503_c0_seq2;comp78473_c0_seq1;comp107196_c0_seq2;comp110880_c0_seq1;comp129010_c0_seq3;comp1…	23
ko04917,Prolactin signaling pathway	Organismal Systems\Endocrine system	comp105904_c0_seq1;comp116119_c0_seq1;comp98476_c0_seq1;comp133677_c1_seq142;comp125932_c0_seq2;comp135196_c0_seq10;comp127328_c0_seq4;comp125450_c0_seq1;comp131621_c0_seq10;comp130611_c1_seq10;comp128813_c0_seq3;comp110195_c0_seq1;comp129465_c1_seq1;comp129867_c1_seq13;comp115139_c0_seq4;comp98858_c0_seq1;comp122959_c0_seq1;comp116098_c0_seq6;comp94045_c0_seq1;comp146137_c0_seq1;comp116657_c0_se…	33
ko05100,Bacterial invasion of epithelial cells	Human Diseases\Infectious diseases	comp127846_c0_seq1;comp7426_c0_seq1;comp115013_c1_seq5;comp119899_c0_seq2;comp123385_c0_seq7;comp133442_c0_seq1;comp127328_c0_seq4;comp125932_c0_seq2;comp135196_c0_seq10;comp126201_c0_seq1;comp135513_c0_seq7;comp82174_c0_seq1;comp89742_c0_seq1;comp119876_c0_seq1;comp121954_c0_seq1;comp132738_c0_seq3;comp69733_c0_seq2;comp79138_c0_seq1;comp125510_c1_seq1;comp133044_c0_seq1;comp100880_c0_seq1;comp1…	81
ko00053,Ascorbate and aldarate metabolism	Metabolism\Carbohydrate metabolism	comp126963_c1_seq1;comp106978_c0_seq1;comp114391_c0_seq1;comp117540_c0_seq4;comp118308_c0_seq12;comp119326_c0_seq1;comp122864_c0_seq1;comp124349_c0_seq2;comp125599_c0_seq11;comp127156_c0_seq1;comp129421_c0_seq3;comp130293_c0_seq4;comp131804_c0_seq1;comp132177_c0_seq2;comp132701_c0_seq3;comp132714_c0_seq1;comp183037_c0_seq1;comp36671_c0_seq1;comp107638_c0_seq2;comp120989_c0_seq1;comp50612_c0_seq1;…	30
ko04145,Phagosome	Cellular Processes\Transport and catabolism	comp121104_c0_seq1;comp42686_c0_seq1;comp47174_c0_seq1;comp49314_c0_seq2;comp49327_c0_seq2;comp51870_c0_seq1;comp64597_c0_seq2;comp65285_c0_seq1;comp79883_c0_seq1;comp80594_c0_seq1;comp80594_c1_seq1;comp83237_c0_seq1;comp85647_c0_seq2;comp94120_c0_seq1;comp99312_c0_seq2;comp107650_c0_seq1;comp113919_c0_seq7;comp116057_c1_seq2;comp119152_c0_seq1;comp121016_c0_seq5;comp130782_c2_seq8;comp136994_c0_…	168
ko00330,Arginine and proline metabolism	Metabolism\Amino acid metabolism	comp37052_c0_seq1;comp53449_c0_seq1;comp109535_c0_seq1;comp142073_c0_seq1;comp116133_c0_seq2;comp121207_c0_seq1;comp119815_c0_seq1;comp130382_c0_seq2;comp115169_c0_seq1;comp115645_c0_seq2;comp132254_c0_seq1;comp52343_c0_seq1;comp91987_c0_seq1;comp92051_c0_seq1;comp114654_c0_seq1;comp114844_c2_seq8;comp118676_c1_seq2;comp131908_c0_seq66;comp50612_c0_seq1;comp106760_c0_seq1;comp113029_c0_seq1;comp1…	63
ko00625,Chloroalkane and chloroalkene degradation	Metabolism\Xenobiotics biodegradation and metabolism	comp78473_c0_seq1;comp107196_c0_seq2;comp110880_c0_seq1;comp50612_c0_seq1;comp106760_c0_seq1;comp113029_c0_seq1;comp113224_c0_seq1;comp128120_c0_seq1;comp129950_c1_seq1;comp132101_c0_seq4;comp135684_c1_seq4;	11
ko04391,Hippo signaling pathway -fly	Environmental Information Processing\Signal transduction	comp48362_c0_seq1;comp114949_c0_seq2;comp132204_c0_seq2;comp45523_c0_seq1;comp51570_c0_seq1;comp59856_c0_seq1;comp64436_c0_seq1;comp64436_c1_seq1;comp68415_c0_seq1;comp106554_c0_seq1;comp116848_c0_seq1;comp119940_c0_seq1;comp141275_c0_seq1;comp148932_c0_seq1;comp54745_c0_seq1;comp140582_c0_seq1;comp125540_c0_seq1;comp124866_c0_seq1;comp118570_c1_seq1;comp119812_c1_seq4;comp130707_c1_seq11;comp131…	104
ko04130,SNARE interactions in vesicular transport	Genetic Information Processing\Folding, sorting and degradation	comp94723_c0_seq2;comp132220_c0_seq1;comp139836_c0_seq1;comp121104_c0_seq1;comp113895_c0_seq1;comp113593_c2_seq1;comp130643_c0_seq1;comp128324_c1_seq1;comp125635_c1_seq3;comp105757_c0_seq1;comp133478_c2_seq1;comp135081_c0_seq11;comp124620_c1_seq1;comp126576_c0_seq1;comp134994_c0_seq1;comp103787_c0_seq1;comp105760_c0_seq1;comp110021_c0_seq1;comp133674_c0_seq2;comp129708_c0_seq3;comp132735_c0_seq1;…	24
ko05416,Viral myocarditis	Human Diseases\Cardiovascular diseases	comp123570_c0_seq7;comp69733_c0_seq2;comp79138_c0_seq1;comp125510_c1_seq1;comp133044_c0_seq1;comp123770_c0_seq3;comp127593_c0_seq1;comp129874_c0_seq19;comp42686_c0_seq1;comp47174_c0_seq1;comp49314_c0_seq2;comp49327_c0_seq2;comp51870_c0_seq1;comp64597_c0_seq2;comp65285_c0_seq1;comp79883_c0_seq1;comp80594_c0_seq1;comp80594_c1_seq1;comp83237_c0_seq1;comp85647_c0_seq2;comp94120_c0_seq1;comp99312_c0_s…	55
ko04022,cGMP - PKG signaling pathway	Environmental Information Processing\Signal transduction	comp88198_c0_seq1;comp93663_c0_seq1;comp110926_c0_seq1;comp121285_c0_seq3;comp124663_c0_seq4;comp94305_c0_seq4;comp113748_c0_seq1;comp97554_c0_seq1;comp123019_c0_seq1;comp61940_c0_seq1;comp110285_c0_seq1;comp94298_c1_seq1;comp118746_c0_seq3;comp124530_c0_seq3;comp129749_c0_seq2;comp130843_c1_seq300;comp133833_c0_seq4;comp70398_c0_seq2;comp105365_c0_seq2;comp110791_c0_seq7;comp38328_c0_seq1;comp44…	115
ko00981,Insect hormone biosynthesis	Metabolism\Metabolism of terpenoids and polyketides	comp130058_c1_seq6;comp130426_c0_seq1;comp50612_c0_seq1;comp106760_c0_seq1;comp113029_c0_seq1;comp113224_c0_seq1;comp128120_c0_seq1;comp129950_c1_seq1;comp132101_c0_seq4;comp135684_c1_seq4;comp123865_c0_seq3;comp123542_c0_seq1;comp145090_c0_seq1;comp126230_c0_seq10;comp134219_c0_seq1;comp129757_c0_seq3;comp109070_c1_seq1;comp127605_c0_seq2;comp116627_c0_seq2;comp78039_c0_seq1;comp93776_c1_seq2;co…	32
ko00760,Nicotinate and nicotinamide metabolism	Metabolism\Metabolism of cofactors and vitamins	comp119684_c0_seq1;comp123271_c0_seq1;comp115377_c0_seq3;comp134093_c2_seq1;comp130116_c0_seq5;comp130310_c1_seq1;comp131543_c1_seq10;comp54192_c0_seq1;comp97149_c0_seq1;comp117624_c0_seq1;comp52188_c0_seq1;comp52188_c1_seq1;comp72551_c0_seq1;comp112824_c0_seq3;comp112932_c0_seq3;comp118272_c0_seq2;comp119373_c0_seq2;comp137749_c0_seq1;comp125971_c0_seq7;comp132853_c0_seq1;comp133808_c0_seq3;comp…	27
ko05032,Morphine addiction	Human Diseases\Substance dependence	comp131187_c0_seq19;comp110306_c0_seq1;comp118155_c0_seq2;comp125268_c1_seq1;comp143129_c0_seq1;comp131247_c0_seq6;comp114370_c0_seq1;comp130573_c0_seq8;comp131291_c0_seq1;comp48393_c0_seq1;comp50622_c0_seq1;comp121216_c0_seq6;comp125799_c0_seq1;comp158929_c0_seq1;comp64083_c0_seq1;comp73074_c0_seq1;comp104720_c0_seq1;comp119436_c0_seq1;comp123839_c1_seq3;comp130305_c0_seq4;comp131544_c0_seq10;co…	52
ko00472,D-Arginine and D-ornithine metabolism	Metabolism\Metabolism of other amino acids	comp131263_c0_seq19;	1
ko05206,MicroRNAs in cancer	Human Diseases\Cancers	comp121028_c0_seq2;comp131746_c5_seq2;comp135922_c0_seq1;comp128393_c2_seq1;comp129465_c1_seq1;comp129867_c1_seq13;comp126912_c1_seq10;comp96298_c0_seq2;comp108686_c1_seq2;comp148658_c0_seq1;comp111945_c0_seq1;comp126201_c0_seq1;comp104073_c0_seq1;comp77154_c0_seq1;comp128862_c0_seq4;comp116774_c0_seq1;comp109498_c0_seq3;comp113981_c0_seq1;comp128411_c1_seq1;comp51079_c0_seq1;comp59762_c0_seq1;co…	101
ko03010,Ribosome	Genetic Information Processing\Translation	comp119811_c0_seq3;comp114342_c0_seq2;comp53368_c0_seq1;comp118064_c0_seq1;comp121775_c0_seq1;comp115075_c0_seq1;comp98915_c0_seq2;comp121967_c0_seq5;comp90622_c0_seq1;comp95875_c0_seq1;comp119856_c0_seq2;comp39249_c0_seq1;comp111089_c0_seq1;comp114836_c0_seq1;comp110566_c0_seq2;comp36839_c0_seq1;comp39014_c0_seq1;comp83059_c0_seq1;comp148913_c0_seq1;comp39205_c0_seq1;comp51990_c0_seq2;comp57233_…	225
ko04623,Cytosolic DNA-sensing pathway	Organismal Systems\Immune system	comp130650_c0_seq2;comp109995_c0_seq1;comp109995_c1_seq1;comp118181_c0_seq1;comp129817_c0_seq1;comp111935_c0_seq1;comp135833_c0_seq1;comp124412_c0_seq1;comp115174_c0_seq1;comp98316_c0_seq1;comp167326_c0_seq1;comp110128_c1_seq1;comp119189_c0_seq1;comp117830_c0_seq2;comp119801_c0_seq1;comp112831_c0_seq1;comp123400_c0_seq1;comp125921_c0_seq2;comp130337_c0_seq1;comp129098_c0_seq1;comp111483_c0_seq1;	21
ko04062,Chemokine signaling pathway	Organismal Systems\Immune system	comp105904_c0_seq1;comp131606_c1_seq17;comp117935_c0_seq2;comp131187_c0_seq19;comp110306_c0_seq1;comp118155_c0_seq2;comp125268_c1_seq1;comp143129_c0_seq1;comp131247_c0_seq6;comp114370_c0_seq1;comp130573_c0_seq8;comp131291_c0_seq1;comp122789_c0_seq11;comp98476_c0_seq1;comp133677_c1_seq142;comp116119_c0_seq1;comp128813_c0_seq3;comp110195_c0_seq1;comp129465_c1_seq1;comp129867_c1_seq13;comp103042_c0_…	76
ko00930,Caprolactam degradation	Metabolism\Xenobiotics biodegradation and metabolism	comp36671_c0_seq1;comp107638_c0_seq2;comp120989_c0_seq1;comp127885_c0_seq1;comp15023_c0_seq1;comp122170_c0_seq1;comp113963_c0_seq1;comp39237_c0_seq1;comp150291_c0_seq1;	9
ko00944,Flavone and flavonol biosynthesis	Metabolism\Biosynthesis of other secondary metabolites	comp128182_c3_seq7;comp129435_c0_seq1;comp134273_c0_seq6;	3
ko05150,Staphylococcus aureus infection	Human Diseases\Infectious diseases	comp123470_c1_seq1;comp131192_c0_seq1;	2
ko04740,Olfactory transduction	Organismal Systems\Sensory system	comp53435_c0_seq1;comp100060_c0_seq2;comp131247_c0_seq6;comp133821_c0_seq1;comp51445_c0_seq1;comp121519_c0_seq5;comp130898_c1_seq3;comp70398_c0_seq2;comp105365_c0_seq2;comp110791_c0_seq7;comp123754_c0_seq3;comp138122_c0_seq1;comp111087_c0_seq1;comp105320_c1_seq1;comp122360_c4_seq46;comp133779_c0_seq5;comp122789_c0_seq11;comp114498_c0_seq27;comp15064_c0_seq1;comp81163_c0_seq2;comp103084_c0_seq1;co…	30
ko04918,Thyroid hormone synthesis	Organismal Systems\Endocrine system	comp135458_c1_seq3;comp53062_c0_seq2;comp131187_c0_seq19;comp110306_c0_seq1;comp118155_c0_seq2;comp125268_c1_seq1;comp143129_c0_seq1;comp131247_c0_seq6;comp114370_c0_seq1;comp130573_c0_seq8;comp131291_c0_seq1;comp122789_c0_seq11;comp93663_c0_seq1;comp110926_c0_seq1;comp121285_c0_seq3;comp116374_c0_seq9;comp131553_c0_seq1;comp129704_c0_seq3;comp111882_c0_seq2;comp132761_c0_seq1;comp124658_c0_seq1;…	63
ko05211,Renal cell carcinoma	Human Diseases\Cancers	comp113691_c0_seq1;comp61078_c0_seq1;comp115669_c0_seq1;comp119843_c2_seq2;comp131568_c3_seq1;comp53457_c0_seq1;comp126496_c1_seq1;comp119699_c0_seq5;comp109498_c0_seq3;comp113981_c0_seq1;comp128411_c1_seq1;comp119393_c0_seq10;comp127647_c2_seq1;comp133760_c0_seq1;comp125932_c0_seq2;comp135196_c0_seq10;comp127328_c0_seq4;comp125450_c0_seq1;comp126201_c0_seq1;comp122689_c0_seq5;comp86066_c0_seq1;c…	47
ko04662,B cell receptor signaling pathway	Organismal Systems\Immune system	comp123247_c0_seq4;comp69733_c0_seq2;comp79138_c0_seq1;comp125510_c1_seq1;comp133044_c0_seq1;comp94305_c0_seq4;comp113748_c0_seq1;comp128813_c0_seq3;comp110195_c0_seq1;comp129465_c1_seq1;comp129867_c1_seq13;comp115139_c0_seq4;comp98858_c0_seq1;comp135827_c0_seq1;comp119982_c0_seq1;comp130337_c0_seq1;comp123400_c0_seq1;comp129098_c0_seq1;comp100748_c0_seq1;comp123733_c0_seq1;comp126964_c0_seq1;com…	27
ko00533,Glycosaminoglycan biosynthesis - keratan sulfate	Metabolism\Glycan biosynthesis and metabolism	comp121221_c0_seq1;comp115666_c0_seq2;comp123309_c1_seq8;comp53830_c0_seq1;comp57414_c0_seq1;comp101432_c0_seq1;comp108246_c0_seq2;comp126550_c0_seq3;	8
ko00562,Inositol phosphate metabolism	Metabolism\Carbohydrate metabolism	comp121895_c0_seq1;comp128538_c0_seq5;comp131552_c0_seq45;comp133540_c0_seq8;comp130986_c1_seq6;comp118305_c0_seq2;comp133548_c2_seq4;comp134530_c0_seq2;comp40242_c0_seq1;comp110597_c0_seq2;comp110597_c1_seq1;comp110597_c2_seq2;comp124771_c0_seq2;comp123480_c0_seq2;comp134072_c1_seq3;comp134354_c0_seq24;comp119672_c0_seq2;comp125725_c1_seq2;comp125932_c0_seq2;comp135196_c0_seq10;comp121028_c0_seq…	56
ko05168,Herpes simplex infection	Human Diseases\Infectious diseases	comp122959_c0_seq1;comp135827_c0_seq1;comp130337_c0_seq1;comp129098_c0_seq1;comp123400_c0_seq1;comp122380_c1_seq3;comp119490_c0_seq1;comp113693_c0_seq2;comp127257_c1_seq1;comp117864_c0_seq1;comp125572_c0_seq7;comp114970_c0_seq1;comp125921_c0_seq2;comp116402_c0_seq1;comp123808_c0_seq2;comp130007_c0_seq1;comp102005_c0_seq3;comp106466_c0_seq2;comp106466_c1_seq1;comp115035_c0_seq1;comp113935_c0_seq1;…	82
ko00512,Mucin type O-glycan biosynthesis	Metabolism\Glycan biosynthesis and metabolism	comp61014_c0_seq2;comp114706_c0_seq1;comp122621_c0_seq1;comp125004_c0_seq3;comp125514_c0_seq5;comp126103_c0_seq2;comp127351_c0_seq1;comp128238_c0_seq1;comp131114_c0_seq8;comp131637_c0_seq1;comp132652_c0_seq1;comp133780_c1_seq5;comp134755_c0_seq4;comp135234_c0_seq2;comp13585_c0_seq1;comp111831_c0_seq5;comp116563_c0_seq1;comp116937_c0_seq1;comp118343_c0_seq5;comp119200_c1_seq16;comp119689_c0_seq1;c…	23
ko04020,Calcium signaling pathway	Environmental Information Processing\Signal transduction	comp123754_c0_seq3;comp138122_c0_seq1;comp111791_c0_seq5;comp115708_c0_seq24;comp127120_c0_seq5;comp53062_c0_seq2;comp131187_c0_seq19;comp110306_c0_seq1;comp118155_c0_seq2;comp125268_c1_seq1;comp143129_c0_seq1;comp131247_c0_seq6;comp130573_c0_seq8;comp131291_c0_seq1;comp122789_c0_seq11;comp41858_c0_seq1;comp109525_c1_seq3;comp114315_c0_seq12;comp129101_c0_seq4;comp126453_c0_seq4;comp38328_c0_seq1…	113
ko04122,Sulfur relay system	Genetic Information Processing\Folding, sorting and degradation	comp122623_c0_seq1;comp147664_c0_seq1;comp111195_c0_seq3;comp134357_c0_seq2;comp127896_c0_seq3;comp129230_c0_seq2;	6
ko05133,Pertussis	Human Diseases\Infectious diseases	comp88228_c0_seq1;comp114058_c0_seq3;comp116792_c0_seq1;comp122309_c1_seq16;comp125874_c0_seq1;comp130927_c1_seq2;comp152004_c0_seq1;comp15064_c0_seq1;comp81163_c0_seq2;comp103084_c0_seq1;comp104565_c0_seq1;comp116486_c0_seq2;comp117960_c0_seq1;comp125266_c0_seq6;comp134642_c0_seq2;comp164180_c0_seq1;comp112176_c0_seq1;comp116613_c0_seq1;comp79584_c0_seq1;comp17431_c0_seq1;comp73734_c0_seq1;comp8…	39
ko00860,Porphyrin and chlorophyll metabolism	Metabolism\Metabolism of cofactors and vitamins	comp135126_c0_seq2;comp128793_c0_seq2;comp132041_c0_seq1;comp134013_c0_seq1;comp126336_c0_seq1;comp134609_c0_seq4;comp128714_c0_seq1;comp133348_c1_seq1;comp124881_c0_seq14;comp135247_c0_seq1;comp127753_c0_seq1;comp127491_c0_seq1;comp134164_c0_seq8;comp125260_c0_seq4;comp106978_c0_seq1;comp114391_c0_seq1;comp117540_c0_seq4;comp118308_c0_seq12;comp119326_c0_seq1;comp122864_c0_seq1;comp124349_c0_seq…	35
ko00531,Glycosaminoglycan degradation	Metabolism\Glycan biosynthesis and metabolism	comp120825_c0_seq14;comp162066_c0_seq1;comp128182_c3_seq7;comp129435_c0_seq1;comp134273_c0_seq6;comp130932_c0_seq6;comp95426_c0_seq1;comp95426_c1_seq2;comp113045_c0_seq2;comp115885_c0_seq1;comp117033_c0_seq3;comp123701_c0_seq3;comp128156_c0_seq5;comp134082_c0_seq4;comp151404_c0_seq1;comp2341_c0_seq2;comp92960_c0_seq3;comp142816_c0_seq1;comp52395_c0_seq1;comp94751_c0_seq1;comp140301_c0_seq1;comp10…	42
ko00514,Other types of O-glycan biosynthesis	Metabolism\Glycan biosynthesis and metabolism	comp120647_c0_seq6;comp140657_c0_seq1;comp134302_c0_seq2;comp127650_c1_seq2;comp134095_c0_seq1;comp115666_c0_seq2;comp123309_c1_seq8;comp126005_c0_seq8;comp78842_c0_seq2;comp121903_c0_seq1;comp130488_c0_seq2;comp147823_c0_seq1;comp107954_c0_seq1;comp105351_c0_seq3;comp114996_c0_seq1;comp115018_c1_seq2;comp119650_c0_seq2;comp127554_c1_seq2;comp127554_c2_seq3;	19
ko00511,Other glycan degradation	Metabolism\Glycan biosynthesis and metabolism	comp2519_c0_seq1;comp130639_c0_seq18;comp131628_c0_seq1;comp132609_c0_seq1;comp173198_c0_seq1;comp16852_c0_seq1;comp37514_c0_seq1;comp67731_c0_seq2;comp117341_c0_seq1;comp123066_c0_seq1;comp125427_c0_seq2;comp126601_c0_seq1;comp138790_c0_seq1;comp143147_c0_seq1;comp38231_c0_seq1;comp124998_c0_seq1;comp131762_c0_seq4;comp132720_c0_seq4;comp156045_c0_seq1;comp20097_c0_seq1;comp108158_c0_seq1;comp11…	43
ko05214,Glioma	Human Diseases\Cancers	comp128862_c0_seq4;comp126462_c1_seq4;comp15064_c0_seq1;comp81163_c0_seq2;comp103084_c0_seq1;comp104565_c0_seq1;comp116486_c0_seq2;comp117960_c0_seq1;comp125266_c0_seq6;comp134642_c0_seq2;comp164180_c0_seq1;comp114498_c0_seq27;comp129704_c0_seq3;comp116119_c0_seq1;comp128813_c0_seq3;comp110195_c0_seq1;comp129465_c1_seq1;comp129867_c1_seq13;comp103042_c0_seq1;comp115139_c0_seq4;comp98858_c0_seq1;c…	31
ko00471,D-Glutamine and D-glutamate metabolism	Metabolism\Metabolism of other amino acids	comp128730_c0_seq1;comp130371_c0_seq13;comp109449_c1_seq1;	3
ko05414,Dilated cardiomyopathy (DCM)	Human Diseases\Cardiovascular diseases	comp88228_c0_seq1;comp114058_c0_seq3;comp116792_c0_seq1;comp122309_c1_seq16;comp125874_c0_seq1;comp130927_c1_seq2;comp152004_c0_seq1;comp123770_c0_seq3;comp127593_c0_seq1;comp129874_c0_seq19;comp42686_c0_seq1;comp47174_c0_seq1;comp49314_c0_seq2;comp49327_c0_seq2;comp51870_c0_seq1;comp64597_c0_seq2;comp65285_c0_seq1;comp79883_c0_seq1;comp80594_c0_seq1;comp80594_c1_seq1;comp83237_c0_seq1;comp85647_…	101
ko00040,Pentose and glucuronate interconversions	Metabolism\Carbohydrate metabolism	comp128182_c3_seq7;comp129435_c0_seq1;comp134273_c0_seq6;comp106978_c0_seq1;comp114391_c0_seq1;comp117540_c0_seq4;comp118308_c0_seq12;comp119326_c0_seq1;comp122864_c0_seq1;comp124349_c0_seq2;comp125599_c0_seq11;comp127156_c0_seq1;comp129421_c0_seq3;comp130293_c0_seq4;comp131804_c0_seq1;comp132177_c0_seq2;comp132701_c0_seq3;comp132714_c0_seq1;comp183037_c0_seq1;comp126963_c1_seq1;comp124743_c0_seq…	44
ko04724,Glutamatergic synapse	Organismal Systems\Nervous system	comp128730_c0_seq1;comp130371_c0_seq13;comp53028_c0_seq1;comp65972_c0_seq1;comp96648_c0_seq2;comp117449_c0_seq2;comp120104_c0_seq11;comp32793_c0_seq1;comp124941_c0_seq13;comp137748_c0_seq1;comp138748_c0_seq1;comp152896_c0_seq1;comp94305_c0_seq4;comp113748_c0_seq1;comp130830_c0_seq1;comp131726_c0_seq2;comp61452_c0_seq1;comp108519_c0_seq5;comp104010_c0_seq1;comp108721_c0_seq2;comp93663_c0_seq1;comp…	74
ko04114,Oocyte meiosis	Cellular Processes\Cell growth and death	comp131187_c0_seq19;comp110306_c0_seq1;comp118155_c0_seq2;comp125268_c1_seq1;comp143129_c0_seq1;comp131247_c0_seq6;comp114370_c0_seq1;comp130573_c0_seq8;comp131291_c0_seq1;comp122789_c0_seq11;comp118769_c0_seq1;comp123602_c0_seq1;comp123602_c1_seq1;comp133492_c0_seq2;comp116231_c0_seq1;comp131054_c0_seq27;comp120842_c0_seq3;comp115139_c0_seq4;comp98858_c0_seq1;comp111132_c0_seq1;comp125132_c0_seq…	86
ko01524,Platinum drug resistance	Human Diseases\Drug resistance	comp123441_c0_seq2;comp135728_c1_seq4;comp94671_c0_seq1;comp105496_c0_seq1;comp108552_c0_seq1;comp114504_c0_seq1;comp114807_c0_seq1;comp115594_c0_seq1;comp120013_c0_seq1;comp121099_c2_seq10;comp123587_c0_seq2;comp127153_c0_seq1;comp127192_c1_seq1;comp130038_c0_seq1;comp126503_c0_seq1;comp116592_c0_seq5;comp134061_c0_seq17;comp133969_c0_seq1;comp126121_c0_seq1;comp40905_c0_seq1;comp130842_c0_seq3;…	41
ko04666,Fc gamma R-mediated phagocytosis	Organismal Systems\Immune system	comp125932_c0_seq2;comp135196_c0_seq10;comp127328_c0_seq4;comp125450_c0_seq1;comp133207_c0_seq2;comp126462_c1_seq4;comp57403_c0_seq2;comp101614_c0_seq1;comp115139_c0_seq4;comp98858_c0_seq1;comp129527_c0_seq1;comp129527_c1_seq3;comp132268_c0_seq2;comp134501_c0_seq1;comp134824_c0_seq1;comp169911_c0_seq1;comp125364_c0_seq5;comp132285_c0_seq4;comp133634_c0_seq4;comp128567_c0_seq3;comp129704_c0_seq3;c…	51
ko03040,Spliceosome	Genetic Information Processing\Transcription	comp117712_c0_seq1;comp53716_c0_seq1;comp127097_c1_seq1;comp133036_c0_seq1;comp134007_c0_seq1;comp102858_c0_seq1;comp117757_c0_seq1;comp58692_c0_seq1;comp135246_c0_seq1;comp131513_c0_seq2;comp131513_c1_seq1;comp132608_c0_seq4;comp105004_c0_seq1;comp122369_c0_seq1;comp122690_c0_seq1;comp104400_c0_seq1;comp100127_c0_seq1;comp53589_c0_seq1;comp120433_c0_seq1;comp126698_c0_seq2;comp106908_c0_seq1;com…	147
ko05221,Acute myeloid leukemia	Human Diseases\Cancers	comp125932_c0_seq2;comp135196_c0_seq10;comp127328_c0_seq4;comp125450_c0_seq1;comp130337_c0_seq1;comp123400_c0_seq1;comp135719_c0_seq1;comp133207_c0_seq2;comp128813_c0_seq3;comp110195_c0_seq1;comp129465_c1_seq1;comp129867_c1_seq13;comp103042_c0_seq1;comp115139_c0_seq4;comp98858_c0_seq1;comp131606_c1_seq17;comp104073_c0_seq1;comp131075_c2_seq2;comp124993_c0_seq2;comp98289_c0_seq1;comp117123_c0_seq3;	21
ko00910,Nitrogen metabolism	Metabolism\Energy metabolism	comp109449_c1_seq1;comp82435_c0_seq1;comp97155_c0_seq2;comp100923_c0_seq1;comp114082_c0_seq1;comp122213_c0_seq1;comp122213_c1_seq1;comp127394_c0_seq2;comp143343_c0_seq1;comp154249_c0_seq1;comp6475_c0_seq1;comp133857_c1_seq2;comp71704_c0_seq1;comp105279_c0_seq1;comp108535_c0_seq3;comp110696_c0_seq1;comp114463_c0_seq1;comp118376_c0_seq1;comp128461_c0_seq1;comp133319_c0_seq1;comp107722_c0_seq1;	21
ko00565,Ether lipid metabolism	Metabolism\Lipid metabolism	comp134749_c0_seq5;comp125364_c0_seq5;comp132285_c0_seq4;comp133634_c0_seq4;comp90914_c0_seq1;comp131956_c0_seq16;comp38327_c0_seq1;comp110160_c0_seq2;comp110342_c0_seq4;comp127165_c0_seq1;comp128330_c3_seq1;comp129542_c0_seq2;comp129894_c0_seq2;comp68410_c0_seq1;comp68410_c1_seq1;comp118835_c0_seq1;comp133975_c1_seq1;comp135764_c0_seq3;comp129527_c0_seq1;comp129527_c1_seq3;comp132268_c0_seq2;com…	35
ko04742,Taste transduction	Organismal Systems\Sensory system	comp130573_c0_seq8;comp122789_c0_seq11;comp48789_c0_seq1;comp82669_c0_seq1;comp141649_c0_seq1;comp146892_c0_seq1;comp161016_c0_seq1;comp115708_c0_seq24;comp61452_c0_seq1;comp105105_c0_seq1;comp121216_c0_seq6;comp125799_c0_seq1;comp158929_c0_seq1;comp81972_c0_seq1;comp95662_c0_seq1;comp102600_c0_seq1;comp120143_c0_seq16;comp128590_c0_seq1;comp140336_c0_seq1;comp142386_c0_seq1;	20
ko04925,Aldosterone synthesis and secretion	Organismal Systems\Endocrine system	comp93663_c0_seq1;comp110926_c0_seq1;comp121285_c0_seq3;comp116374_c0_seq9;comp131553_c0_seq1;comp134353_c0_seq3;comp129704_c0_seq3;comp101614_c0_seq1;comp112007_c0_seq2;comp124658_c0_seq1;comp108518_c0_seq1;comp125091_c0_seq1;comp126135_c1_seq1;comp122699_c0_seq1;comp129797_c0_seq2;comp38045_c0_seq1;comp48552_c0_seq1;comp120134_c0_seq1;comp95885_c0_seq2;comp38328_c0_seq1;comp44342_c0_seq1;comp10…	60
ko03430,Mismatch repair	Genetic Information Processing\Replication and repair	comp122747_c0_seq1;comp132557_c2_seq3;comp129084_c1_seq4;comp40905_c0_seq1;comp130842_c0_seq3;comp133969_c0_seq1;comp126121_c0_seq1;comp127715_c0_seq7;comp115231_c1_seq1;comp125183_c0_seq4;comp110980_c0_seq3;comp121299_c0_seq1;comp120735_c0_seq1;comp129786_c0_seq1;comp98583_c1_seq1;comp123684_c0_seq6;comp98235_c0_seq1;comp116706_c0_seq1;comp114135_c0_seq1;comp119858_c0_seq1;comp125166_c0_seq1;	21
ko04614,Renin-angiotensin system	Organismal Systems\Endocrine system	comp78983_c0_seq1;comp103660_c0_seq1;comp112398_c0_seq1;comp130805_c0_seq2;comp140917_c0_seq1;comp159410_c0_seq1;comp124790_c0_seq4;comp134675_c0_seq4;comp51444_c0_seq1;comp83008_c0_seq2;comp99059_c0_seq1;comp99059_c1_seq1;comp100256_c0_seq1;comp100256_c1_seq1;comp106295_c0_seq1;comp111618_c0_seq1;comp124186_c0_seq3;comp141979_c0_seq1;comp142005_c0_seq1;comp152298_c0_seq1;comp121613_c0_seq1;comp4…	29
ko04610,Complement and coagulation cascades	Organismal Systems\Immune system	comp50937_c0_seq1;comp35901_c0_seq2;comp41816_c0_seq1;comp61274_c0_seq1;comp116883_c0_seq1;comp117312_c0_seq2;comp123324_c0_seq29;comp125593_c0_seq1;comp135589_c0_seq2;comp143622_c0_seq1;comp123470_c1_seq1;comp131192_c0_seq1;comp53918_c0_seq1;comp92744_c0_seq2;comp109997_c0_seq1;comp109997_c2_seq1;comp122100_c0_seq5;comp127264_c0_seq6;comp127264_c1_seq1;comp130606_c0_seq1;comp134743_c0_seq31;	21
ko04310,Wnt signaling pathway	Environmental Information Processing\Signal transduction	comp127314_c0_seq9;comp68150_c0_seq1;comp3993_c0_seq1;comp50827_c0_seq1;comp110996_c1_seq2;comp157687_c0_seq1;comp91391_c0_seq1;comp78008_c0_seq1;comp124647_c0_seq1;comp125498_c0_seq1;comp80666_c0_seq1;comp104535_c0_seq1;comp125060_c0_seq9;comp115872_c0_seq4;comp134547_c1_seq3;comp63691_c0_seq1;comp94409_c0_seq1;comp107920_c0_seq1;comp123869_c0_seq2;comp130659_c0_seq5;comp130686_c0_seq4;comp46712…	90
ko04924,Renin secretion	Organismal Systems\Endocrine system	comp89679_c1_seq1;comp53062_c0_seq2;comp114370_c0_seq1;comp122789_c0_seq11;comp117522_c0_seq4;comp122176_c1_seq1;comp134553_c0_seq1;comp105105_c0_seq1;comp71208_c0_seq1;comp99105_c0_seq1;comp117935_c0_seq2;comp126453_c0_seq4;comp132937_c0_seq1;comp38328_c0_seq1;comp44342_c0_seq1;comp109217_c0_seq2;comp115735_c0_seq2;comp137249_c0_seq1;comp138265_c0_seq1;comp93663_c0_seq1;comp110926_c0_seq1;comp12…	52
ko00260,Glycine, serine and threonine metabolism	Metabolism\Amino acid metabolism	comp103366_c0_seq2;comp118554_c0_seq32;comp126393_c0_seq1;comp126568_c0_seq1;comp128380_c0_seq2;comp120141_c0_seq1;comp120141_c1_seq1;comp120141_c2_seq1;comp139419_c0_seq1;comp133999_c0_seq20;comp134272_c0_seq1;comp111185_c0_seq2;comp125350_c0_seq1;comp46755_c0_seq1;comp131143_c0_seq1;comp156940_c0_seq1;comp113426_c0_seq2;comp119681_c0_seq14;comp126312_c0_seq1;comp135126_c0_seq2;comp135441_c0_seq…	55
ko02025,Biofilm formation - Pseudomonas aeruginosa	Cellular Processes\Cellular community - prokaryotes	comp2393_c0_seq1;	1
ko04660,T cell receptor signaling pathway	Organismal Systems\Immune system	comp99162_c0_seq1;comp129120_c0_seq69;comp130570_c0_seq18;comp121824_c0_seq2;comp123247_c0_seq4;comp128813_c0_seq3;comp115151_c0_seq2;comp125875_c0_seq3;comp135169_c0_seq3;comp119403_c0_seq1;comp135423_c0_seq1;comp112176_c0_seq1;comp116613_c0_seq1;comp82174_c0_seq1;comp89742_c0_seq1;comp119876_c0_seq1;comp121954_c0_seq1;comp132738_c0_seq3;comp124080_c0_seq6;comp116098_c0_seq6;comp126462_c1_seq4;c…	45
ko04152,AMPK signaling pathway	Environmental Information Processing\Signal transduction	comp117864_c0_seq1;comp125572_c0_seq7;comp114307_c0_seq2;comp98081_c0_seq1;comp82653_c0_seq1;comp129685_c0_seq4;comp107668_c0_seq1;comp88198_c0_seq1;comp129409_c0_seq1;comp93124_c0_seq1;comp117186_c0_seq1;comp126391_c0_seq6;comp133683_c0_seq1;comp171322_c0_seq1;comp119670_c0_seq22;comp41601_c0_seq1;comp124240_c0_seq3;comp103467_c0_seq2;comp132444_c3_seq6;comp105063_c0_seq1;comp125829_c0_seq15;com…	85
ko00620,Pyruvate metabolism	Metabolism\Carbohydrate metabolism	comp133404_c0_seq4;comp134114_c0_seq1;comp109156_c0_seq1;comp113995_c0_seq1;comp121813_c0_seq1;comp124583_c0_seq1;comp114733_c0_seq1;comp107557_c0_seq1;comp132667_c0_seq7;comp112009_c0_seq4;comp50612_c0_seq1;comp106760_c0_seq1;comp113029_c0_seq1;comp113224_c0_seq1;comp128120_c0_seq1;comp129950_c1_seq1;comp132101_c0_seq4;comp135684_c1_seq4;comp129394_c0_seq1;comp130399_c0_seq1;comp82031_c0_seq1;co…	39
ko00261,Monobactam biosynthesis	Metabolism\Biosynthesis of other secondary metabolites	comp126627_c0_seq2;	1
ko00010,Glycolysis / Gluconeogenesis	Metabolism\Carbohydrate metabolism	comp117934_c0_seq1;comp134591_c0_seq2;comp124475_c0_seq1;comp125829_c0_seq15;comp105063_c0_seq1;comp94084_c0_seq1;comp108284_c0_seq4;comp118559_c0_seq1;comp119897_c0_seq1;comp119897_c1_seq1;comp136998_c0_seq1;comp148544_c0_seq1;comp45583_c0_seq1;comp115429_c0_seq1;comp115646_c0_seq1;comp170480_c0_seq1;comp46251_c0_seq1;comp90932_c0_seq1;comp110416_c0_seq1;comp115481_c0_seq1;comp121598_c0_seq1;com…	65
ko05213,Endometrial cancer	Human Diseases\Cancers	comp128862_c0_seq4;comp125932_c0_seq2;comp135196_c0_seq10;comp127328_c0_seq4;comp121028_c0_seq2;comp131746_c5_seq2;comp127110_c0_seq14;comp133520_c0_seq2;comp125450_c0_seq1;comp131621_c0_seq10;comp128813_c0_seq3;comp110195_c0_seq1;comp129465_c1_seq1;comp129867_c1_seq13;comp103042_c0_seq1;comp115139_c0_seq4;comp98858_c0_seq1;comp129084_c1_seq4;comp127846_c0_seq1;comp7426_c0_seq1;comp115013_c1_seq5…	31
ko00604,Glycosphingolipid biosynthesis - ganglio series	Metabolism\Glycan biosynthesis and metabolism	comp105382_c0_seq1;comp2519_c0_seq1;comp130639_c0_seq18;comp131628_c0_seq1;comp132609_c0_seq1;comp173198_c0_seq1;comp16852_c0_seq1;comp37514_c0_seq1;comp67731_c0_seq2;comp117341_c0_seq1;comp123066_c0_seq1;comp125427_c0_seq2;comp126601_c0_seq1;comp138790_c0_seq1;comp143147_c0_seq1;	15
ko04215,Apoptosis - multiple species	Cellular Processes\Cell growth and death	comp131813_c0_seq5;comp17431_c0_seq1;comp73734_c0_seq1;comp80051_c0_seq1;comp124922_c0_seq5;comp126730_c0_seq3;comp128232_c0_seq31;comp130858_c0_seq2;comp130888_c0_seq21;comp110082_c0_seq2;comp45705_c0_seq1;comp110420_c0_seq1;comp131625_c0_seq10;comp37152_c0_seq1;comp70771_c0_seq1;comp101765_c0_seq1;comp131935_c0_seq2;comp122959_c0_seq1;comp69041_c0_seq1;comp102176_c0_seq3;comp120106_c0_seq1;comp…	29
ko05142,Chagas disease (American trypanosomiasis)	Human Diseases\Infectious diseases	comp38858_c0_seq1;comp119490_c0_seq1;comp127007_c0_seq1;comp125986_c0_seq1;comp113693_c0_seq2;comp127901_c0_seq6;comp122959_c0_seq1;comp98858_c0_seq1;comp116098_c0_seq6;comp135827_c0_seq1;comp130337_c0_seq1;comp129098_c0_seq1;comp123400_c0_seq1;comp115387_c0_seq4;comp105997_c1_seq4;comp112351_c0_seq1;comp132626_c2_seq4;comp80130_c0_seq1;comp116625_c0_seq1;comp166775_c0_seq1;comp78983_c0_seq1;comp…	42
ko05212,Pancreatic cancer	Human Diseases\Cancers	comp129465_c1_seq1;comp129867_c1_seq13;comp125932_c0_seq2;comp135196_c0_seq10;comp127328_c0_seq4;comp69733_c0_seq2;comp79138_c0_seq1;comp125510_c1_seq1;comp133044_c0_seq1;comp123400_c0_seq1;comp125450_c0_seq1;comp130337_c0_seq1;comp110082_c0_seq2;comp103042_c0_seq1;comp115139_c0_seq4;comp98858_c0_seq1;comp122959_c0_seq1;comp124594_c0_seq1;comp132518_c0_seq2;comp82174_c0_seq1;comp89742_c0_seq1;com…	33
ko01522,Endocrine resistance	Human Diseases\Drug resistance	comp128222_c0_seq1;comp121197_c0_seq1;comp135827_c0_seq1;comp116131_c0_seq1;comp53062_c0_seq2;comp98476_c0_seq1;comp133677_c1_seq142;comp131187_c0_seq19;comp110306_c0_seq1;comp118155_c0_seq2;comp125268_c1_seq1;comp143129_c0_seq1;comp131247_c0_seq6;comp114370_c0_seq1;comp130573_c0_seq8;comp131291_c0_seq1;comp122789_c0_seq11;comp128862_c0_seq4;comp116119_c0_seq1;comp128813_c0_seq3;comp110195_c0_seq…	47
ko00626,Naphthalene degradation	Metabolism\Xenobiotics biodegradation and metabolism	comp78473_c0_seq1;comp107196_c0_seq2;comp110880_c0_seq1;	3
ko05320,Autoimmune thyroid disease	Human Diseases\Immune diseases	comp135458_c1_seq3;	1
ko00280,Valine, leucine and isoleucine degradation	Metabolism\Amino acid metabolism	comp52950_c0_seq1;comp115398_c0_seq2;comp133476_c0_seq1;comp129274_c0_seq3;comp134418_c0_seq2;comp114733_c0_seq1;comp122249_c0_seq1;comp115988_c0_seq1;comp125416_c0_seq1;comp119137_c0_seq1;comp79538_c0_seq1;comp124603_c0_seq1;comp134060_c0_seq18;comp15023_c0_seq1;comp122170_c0_seq1;comp113963_c0_seq1;comp39237_c0_seq1;comp150291_c0_seq1;comp117119_c0_seq1;comp118800_c2_seq1;comp132363_c0_seq1;com…	53
ko04970,Salivary secretion	Organismal Systems\Digestive system	comp53062_c0_seq2;comp131187_c0_seq19;comp110306_c0_seq1;comp118155_c0_seq2;comp125268_c1_seq1;comp143129_c0_seq1;comp131247_c0_seq6;comp114370_c0_seq1;comp130573_c0_seq8;comp131291_c0_seq1;comp122789_c0_seq11;comp103787_c0_seq1;comp105760_c0_seq1;comp110021_c0_seq1;comp88198_c0_seq1;comp115708_c0_seq24;comp93663_c0_seq1;comp110926_c0_seq1;comp121285_c0_seq3;comp116374_c0_seq9;comp131553_c0_seq1;…	65
ko03020,RNA polymerase	Genetic Information Processing\Transcription	comp130025_c1_seq1;comp56094_c1_seq1;comp92130_c0_seq1;comp95343_c0_seq1;comp99909_c0_seq1;comp105763_c0_seq1;comp128504_c0_seq1;comp115365_c0_seq1;comp115807_c0_seq1;comp109257_c0_seq1;comp120823_c0_seq1;comp110152_c0_seq1;comp110128_c1_seq1;comp119189_c0_seq1;comp117830_c0_seq2;comp119801_c0_seq1;comp112831_c0_seq1;comp109995_c0_seq1;comp109995_c1_seq1;comp130650_c0_seq2;comp135833_c0_seq1;comp…	33
ko00903,Limonene and pinene degradation	Metabolism\Metabolism of terpenoids and polyketides	comp50612_c0_seq1;comp106760_c0_seq1;comp113029_c0_seq1;comp113224_c0_seq1;comp128120_c0_seq1;comp129950_c1_seq1;comp132101_c0_seq4;comp135684_c1_seq4;	8
ko00020,Citrate cycle (TCA cycle)	Metabolism\Carbohydrate metabolism	comp112469_c0_seq1;comp124473_c0_seq4;comp114555_c0_seq1;comp125597_c0_seq1;comp111288_c0_seq1;comp115082_c0_seq1;comp118787_c1_seq1;comp119279_c0_seq1;comp130163_c0_seq3;comp115844_c0_seq8;comp130981_c0_seq2;comp141564_c0_seq1;comp119855_c0_seq1;comp114733_c0_seq1;comp122651_c3_seq1;comp124668_c0_seq1;comp132119_c0_seq13;comp125110_c0_seq1;comp166198_c0_seq1;comp126683_c0_seq1;comp119835_c0_seq1…	35
ko00061,Fatty acid biosynthesis	Metabolism\Lipid metabolism	comp132667_c0_seq7;comp112328_c0_seq1;comp127500_c0_seq1;comp132296_c0_seq1;comp114377_c0_seq1;comp130054_c0_seq11;comp131818_c0_seq5;comp134099_c0_seq1;comp171333_c0_seq1;comp42503_c0_seq1;comp78407_c0_seq1;comp78615_c0_seq2;comp112210_c0_seq1;comp112210_c1_seq3;comp117959_c0_seq2;comp127780_c0_seq4;	16
ko05144,Malaria	Human Diseases\Infectious diseases	comp122828_c0_seq1;comp52066_c0_seq1;comp78172_c0_seq1;comp84443_c0_seq2;comp93956_c0_seq1;comp126327_c0_seq2;comp128743_c1_seq2;comp131528_c0_seq5;comp100748_c0_seq1;comp123733_c0_seq1;comp126964_c0_seq1;comp119490_c0_seq1;comp38858_c0_seq1;comp134042_c1_seq1;	14
ko01200,Carbon metabolism	Metabolism\Overview	comp117934_c0_seq1;comp134591_c0_seq2;comp132050_c0_seq4;comp124475_c0_seq1;comp125829_c0_seq15;comp94084_c0_seq1;comp108284_c0_seq4;comp118559_c0_seq1;comp119897_c0_seq1;comp119897_c1_seq1;comp136998_c0_seq1;comp148544_c0_seq1;comp45583_c0_seq1;comp115429_c0_seq1;comp115646_c0_seq1;comp170480_c0_seq1;comp46251_c0_seq1;comp90932_c0_seq1;comp110416_c0_seq1;comp115481_c0_seq1;comp121598_c0_seq1;com…	133
ko04071,Sphingolipid signaling pathway	Environmental Information Processing\Signal transduction	comp128617_c1_seq1;comp133771_c0_seq6;comp130330_c0_seq9;comp144216_c0_seq1;comp155552_c0_seq1;comp155962_c0_seq1;comp125393_c0_seq1;comp41355_c0_seq1;comp109451_c0_seq2;comp117412_c0_seq1;comp121964_c0_seq2;comp126141_c0_seq2;comp127010_c0_seq3;comp132572_c0_seq2;comp107281_c0_seq1;comp119533_c0_seq2;comp132818_c0_seq1;comp123412_c0_seq3;comp119968_c0_seq3;comp131920_c1_seq4;comp120390_c0_seq1;c…	90
ko04110,Cell cycle	Cellular Processes\Cell growth and death	comp96298_c0_seq2;comp108686_c1_seq2;comp148658_c0_seq1;comp126912_c1_seq10;comp122750_c1_seq1;comp123570_c0_seq7;comp122253_c0_seq1;comp133914_c1_seq2;comp114128_c0_seq1;comp94045_c0_seq1;comp146137_c0_seq1;comp107639_c0_seq5;comp126226_c0_seq1;comp98289_c0_seq1;comp117123_c0_seq3;comp135922_c0_seq1;comp111945_c0_seq1;comp113585_c0_seq1;comp77720_c0_seq1;comp99302_c0_seq1;comp115728_c0_seq1;comp…	95
ko04725,Cholinergic synapse	Organismal Systems\Nervous system	comp71948_c0_seq1;comp99547_c0_seq1;comp124259_c0_seq3;comp124757_c1_seq2;comp125930_c0_seq1;comp128083_c1_seq4;comp128125_c1_seq2;comp130836_c0_seq2;comp134258_c0_seq1;comp136253_c0_seq1;comp139081_c0_seq1;comp63187_c0_seq1;comp88273_c0_seq1;comp136825_c0_seq1;comp115708_c0_seq24;comp93663_c0_seq1;comp110926_c0_seq1;comp121285_c0_seq3;comp116374_c0_seq9;comp131553_c0_seq1;comp134353_c0_seq3;comp…	59
ko04142,Lysosome	Cellular Processes\Transport and catabolism	comp93473_c0_seq4;comp120710_c0_seq1;comp130740_c1_seq7;comp109972_c0_seq1;comp109828_c0_seq2;comp122835_c0_seq1;comp108226_c0_seq1;comp115623_c0_seq1;comp149981_c0_seq1;comp102996_c0_seq1;comp48331_c0_seq1;comp107350_c0_seq1;comp123201_c0_seq4;comp130886_c0_seq1;comp44002_c0_seq1;comp114340_c0_seq2;comp117231_c2_seq1;comp109939_c0_seq2;comp118964_c0_seq1;comp37921_c0_seq1;comp60174_c0_seq1;comp6…	187
ko00120,Primary bile acid biosynthesis	Metabolism\Lipid metabolism	comp122928_c0_seq7;comp125922_c1_seq4;comp128962_c0_seq2;comp130740_c0_seq1;	4
ko00524,Neomycin, kanamycin and gentamicin biosynthesis	Metabolism\Biosynthesis of other secondary metabolites	comp117934_c0_seq1;comp134591_c0_seq2;	2
ko04961,Endocrine and other factor-regulated calcium reabsorption	Organismal Systems\Excretory system	comp115575_c0_seq2;comp115853_c0_seq1;comp131883_c0_seq4;comp53062_c0_seq2;comp131291_c0_seq1;comp122789_c0_seq11;comp114156_c1_seq3;comp124132_c0_seq3;comp127748_c2_seq2;comp120942_c0_seq1;comp129352_c0_seq1;comp119584_c0_seq2;comp109185_c0_seq2;comp118167_c0_seq3;comp117171_c1_seq3;comp121757_c0_seq1;comp124835_c0_seq2;comp78875_c0_seq7;comp102019_c0_seq1;comp107556_c0_seq1;comp112206_c0_seq4;c…	28
ko04270,Vascular smooth muscle contraction	Organismal Systems\Circulatory system	comp88198_c0_seq1;comp88143_c0_seq1;comp93663_c0_seq1;comp110926_c0_seq1;comp121285_c0_seq3;comp38327_c0_seq1;comp110160_c0_seq2;comp110342_c0_seq4;comp127165_c0_seq1;comp128330_c3_seq1;comp129542_c0_seq2;comp129894_c0_seq2;comp68410_c0_seq1;comp68410_c1_seq1;comp118835_c0_seq1;comp133975_c1_seq1;comp135764_c0_seq3;comp117522_c0_seq4;comp122176_c1_seq1;comp134553_c0_seq1;comp38328_c0_seq1;comp443…	84
ko04213,Longevity regulating pathway - multiple species	Organismal Systems\Aging	comp50097_c0_seq1;comp94590_c0_seq1;comp117192_c0_seq1;comp132702_c0_seq3;comp134550_c0_seq8;comp135037_c0_seq12;comp142807_c0_seq1;comp123862_c0_seq6;comp129465_c1_seq1;comp129867_c1_seq13;comp125932_c0_seq2;comp135196_c0_seq10;comp127328_c0_seq4;comp125450_c0_seq1;comp131187_c0_seq19;comp110306_c0_seq1;comp118155_c0_seq2;comp125268_c1_seq1;comp143129_c0_seq1;comp131247_c0_seq6;comp114370_c0_seq…	84
ko04620,Toll-like receptor signaling pathway	Organismal Systems\Immune system	comp114970_c0_seq1;comp38858_c0_seq1;comp69733_c0_seq2;comp79138_c0_seq1;comp125510_c1_seq1;comp133044_c0_seq1;comp125932_c0_seq2;comp135196_c0_seq10;comp127328_c0_seq4;comp125450_c0_seq1;comp104195_c0_seq1;comp119490_c0_seq1;comp131813_c0_seq5;comp125986_c0_seq1;comp127007_c0_seq1;comp113693_c0_seq2;comp127257_c1_seq1;comp117864_c0_seq1;comp125572_c0_seq7;comp130337_c0_seq1;comp129098_c0_seq1;co…	31
ko04650,Natural killer cell mediated cytotoxicity	Organismal Systems\Immune system	comp122380_c1_seq3;comp123247_c0_seq4;comp69733_c0_seq2;comp79138_c0_seq1;comp125510_c1_seq1;comp133044_c0_seq1;comp115151_c0_seq2;comp125875_c0_seq3;comp135169_c0_seq3;comp115139_c0_seq4;comp98858_c0_seq1;comp126462_c1_seq4;comp125932_c0_seq2;comp135196_c0_seq10;comp127328_c0_seq4;comp116119_c0_seq1;comp128813_c0_seq3;comp110195_c0_seq1;comp129465_c1_seq1;comp129867_c1_seq13;comp103042_c0_seq1;c…	24
ko04727,GABAergic synapse	Organismal Systems\Nervous system	comp128730_c0_seq1;comp130371_c0_seq13;comp121860_c0_seq3;comp125128_c0_seq1;comp48393_c0_seq1;comp50622_c0_seq1;comp121569_c0_seq3;comp121216_c0_seq6;comp125799_c0_seq1;comp158929_c0_seq1;comp64083_c0_seq1;comp73074_c0_seq1;comp104720_c0_seq1;comp119436_c0_seq1;comp123839_c1_seq3;comp130305_c0_seq4;comp131544_c0_seq10;comp132055_c0_seq1;comp122789_c0_seq11;comp98476_c0_seq1;comp133677_c1_seq142;…	65
ko03070,Bacterial secretion system	Environmental Information Processing\Membrane transport	comp108761_c0_seq1;comp120627_c1_seq1;	2
ko05230,Central carbon metabolism in cancer	Human Diseases\Cancers	comp119393_c0_seq10;comp127647_c2_seq1;comp133760_c0_seq1;comp107557_c0_seq1;comp109156_c0_seq1;comp113995_c0_seq1;comp134836_c0_seq1;comp98289_c0_seq1;comp117123_c0_seq3;comp113691_c0_seq1;comp128862_c0_seq4;comp132679_c0_seq1;comp129465_c1_seq1;comp129867_c1_seq13;comp115139_c0_seq4;comp98858_c0_seq1;comp128730_c0_seq1;comp130371_c0_seq13;comp126064_c0_seq2;comp167382_c0_seq1;comp117934_c0_seq1…	31
ko04960,Aldosterone-regulated sodium reabsorption	Organismal Systems\Excretory system	comp129465_c1_seq1;comp129867_c1_seq13;comp117171_c1_seq3;comp121757_c0_seq1;comp124835_c0_seq2;comp78875_c0_seq7;comp102019_c0_seq1;comp107556_c0_seq1;comp112206_c0_seq4;comp113972_c0_seq3;comp50097_c0_seq1;comp94590_c0_seq1;comp117192_c0_seq1;comp132702_c0_seq3;comp134550_c0_seq8;comp135037_c0_seq12;comp142807_c0_seq1;comp123862_c0_seq6;comp127328_c0_seq4;comp125932_c0_seq2;comp135196_c0_seq10;…	24
ko04940,Type I diabetes mellitus	Human Diseases\Endocrine and metabolic diseases	comp121860_c0_seq3;comp125128_c0_seq1;comp66968_c0_seq1;comp76905_c0_seq1;comp81074_c0_seq1;comp92586_c0_seq1;comp78321_c0_seq2;comp117731_c0_seq1;comp154699_c0_seq1;comp122077_c0_seq2;	10
ko04150,mTOR signaling pathway	Environmental Information Processing\Signal transduction	comp102637_c0_seq1;comp131659_c0_seq3;comp121084_c0_seq1;comp56944_c0_seq1;comp128162_c0_seq1;comp154845_c0_seq1;comp118027_c0_seq1;comp39195_c0_seq1;comp105135_c0_seq1;comp99332_c0_seq1;comp83909_c0_seq1;comp109828_c0_seq2;comp127724_c0_seq1;comp123429_c0_seq2;comp132115_c0_seq10;comp97462_c0_seq1;comp134850_c0_seq2;comp126036_c0_seq1;comp126893_c0_seq2;comp53205_c0_seq1;comp121614_c0_seq6;comp1…	108
ko00720,Carbon fixation pathways in prokaryotes	Metabolism\Energy metabolism	comp93623_c0_seq2;comp107590_c0_seq4;comp107590_c1_seq1;comp135402_c0_seq1;comp107451_c0_seq3;comp128696_c0_seq3;comp111288_c0_seq1;comp115082_c0_seq1;comp114555_c0_seq1;comp125597_c0_seq1;comp124473_c0_seq4;comp119365_c0_seq1;comp125189_c3_seq2;comp59859_c0_seq1;comp115978_c0_seq1;comp149998_c0_seq1;comp133404_c0_seq4;comp134114_c0_seq1;	18
ko00513,Various types of N-glycan biosynthesis	Metabolism\Glycan biosynthesis and metabolism	comp112998_c0_seq1;comp117373_c0_seq2;comp98821_c0_seq1;comp121290_c0_seq1;comp132451_c0_seq1;comp110655_c0_seq1;comp133718_c0_seq3;comp108197_c0_seq2;comp53016_c0_seq1;comp121590_c0_seq1;comp105468_c0_seq1;comp127317_c0_seq2;comp88649_c0_seq1;comp125785_c0_seq1;comp131170_c0_seq1;comp129501_c0_seq2;comp134902_c0_seq2;comp173692_c0_seq1;comp133637_c1_seq14;comp135039_c0_seq4;comp86642_c0_seq1;com…	71
ko04212,Longevity regulating pathway - worm	Organismal Systems\Aging	comp122959_c0_seq1;comp50097_c0_seq1;comp94590_c0_seq1;comp117192_c0_seq1;comp132702_c0_seq3;comp134550_c0_seq8;comp135037_c0_seq12;comp142807_c0_seq1;comp123862_c0_seq6;comp125932_c0_seq2;comp135196_c0_seq10;comp121028_c0_seq2;comp131746_c5_seq2;comp125450_c0_seq1;comp131621_c0_seq10;comp104143_c0_seq4;comp123751_c1_seq1;comp113068_c0_seq2;comp109110_c0_seq1;comp112788_c0_seq1;comp11549_c0_seq1;…	68
ko05160,Hepatitis C	Human Diseases\Infectious diseases	comp100748_c0_seq1;comp123733_c0_seq1;comp126964_c0_seq1;comp125921_c0_seq2;comp114970_c0_seq1;comp113693_c0_seq2;comp130337_c0_seq1;comp129098_c0_seq1;comp123400_c0_seq1;comp123808_c0_seq2;comp130007_c0_seq1;comp102005_c0_seq3;comp106466_c0_seq2;comp106466_c1_seq1;comp115035_c0_seq1;comp121641_c0_seq1;comp122858_c0_seq4;comp151599_c0_seq1;comp115387_c0_seq4;comp105997_c1_seq4;comp112351_c0_seq1;…	44
ko00500,Starch and sucrose metabolism	Metabolism\Carbohydrate metabolism	comp126818_c0_seq7;comp124685_c0_seq2;comp98386_c0_seq1;comp129740_c0_seq3;comp134125_c0_seq26;comp124743_c0_seq1;comp52188_c0_seq1;comp52188_c1_seq1;comp72551_c0_seq1;comp112824_c0_seq3;comp112932_c0_seq3;comp118272_c0_seq2;comp119373_c0_seq2;comp137749_c0_seq1;comp102731_c1_seq1;comp133009_c0_seq1;comp133762_c0_seq1;comp124814_c0_seq4;comp108875_c0_seq2;comp108370_c0_seq1;comp119906_c0_seq1;com…	40
ko00627,Aminobenzoate degradation	Metabolism\Xenobiotics biodegradation and metabolism	comp112009_c0_seq4;comp15023_c0_seq1;comp122170_c0_seq1;comp113963_c0_seq1;comp44574_c0_seq1;comp55712_c0_seq1;comp70887_c0_seq1;comp97310_c0_seq1;comp105820_c0_seq2;comp108190_c0_seq1;comp110823_c0_seq4;comp114841_c0_seq1;comp118035_c0_seq1;comp119957_c0_seq2;comp125430_c0_seq7;comp128625_c0_seq2;comp129544_c0_seq1;comp136914_c0_seq1;comp138102_c0_seq1;comp143579_c0_seq1;comp144905_c0_seq1;comp1…	24
ko04144,Endocytosis	Cellular Processes\Transport and catabolism	comp122978_c1_seq1;comp127306_c1_seq7;comp107639_c0_seq5;comp128862_c0_seq4;comp100088_c0_seq1;comp116083_c0_seq12;comp130035_c0_seq13;comp130354_c0_seq4;comp130815_c0_seq1;comp133410_c0_seq3;comp134655_c0_seq29;comp132679_c0_seq1;comp124132_c0_seq3;comp113885_c0_seq1;comp134354_c0_seq24;comp129527_c0_seq1;comp129527_c1_seq3;comp132268_c0_seq2;comp134501_c0_seq1;comp134824_c0_seq1;comp169911_c0_s…	178
ko02010,ABC transporters	Environmental Information Processing\Membrane transport	comp107269_c0_seq1;comp107471_c0_seq1;comp126799_c0_seq2;comp133335_c0_seq1;comp135693_c0_seq1;comp65807_c0_seq1;comp89416_c0_seq1;comp89488_c0_seq1;comp89488_c1_seq1;comp89488_c2_seq2;comp130692_c0_seq6;comp127331_c0_seq5;comp135315_c0_seq1;comp122128_c0_seq2;comp130343_c1_seq2;comp135563_c0_seq3;comp131924_c0_seq3;comp2527_c0_seq1;comp2798_c0_seq1;comp74414_c0_seq2;comp112468_c1_seq4;comp112977…	41
ko00310,Lysine degradation	Metabolism\Amino acid metabolism	comp133416_c0_seq1;comp129394_c0_seq1;comp7736_c0_seq1;comp81390_c0_seq2;comp126120_c0_seq3;comp130351_c0_seq3;comp133909_c0_seq1;comp158740_c0_seq1;comp115844_c0_seq8;comp130981_c0_seq2;comp141564_c0_seq1;comp119855_c0_seq1;comp128748_c0_seq1;comp15023_c0_seq1;comp122170_c0_seq1;comp113963_c0_seq1;comp39237_c0_seq1;comp150291_c0_seq1;comp128696_c0_seq3;comp129730_c0_seq1;comp58467_c0_seq1;comp11…	143
ko00290,Valine, leucine and isoleucine biosynthesis	Metabolism\Amino acid metabolism	comp125677_c0_seq2;comp130031_c1_seq4;comp79362_c0_seq1;comp143632_c0_seq1;comp52950_c0_seq1;comp115398_c0_seq2;	6
ko04115,p53 signaling pathway	Cellular Processes\Cell growth and death	comp133182_c0_seq6;comp117922_c0_seq1;comp131934_c0_seq3;comp117726_c0_seq1;comp111138_c0_seq3;comp133537_c0_seq10;comp96298_c0_seq2;comp108686_c1_seq2;comp148658_c0_seq1;comp126912_c1_seq10;comp111945_c0_seq1;comp113585_c0_seq1;comp124361_c0_seq2;comp126762_c0_seq1;comp132415_c0_seq1;comp114381_c0_seq1;comp131813_c0_seq5;comp131097_c0_seq1;comp45705_c0_seq1;comp110420_c0_seq1;comp129262_c1_seq2;…	34
ko05012,Parkinson's disease	Human Diseases\Neurodegenerative diseases	comp127120_c0_seq5;comp117935_c0_seq2;comp114370_c0_seq1;comp122789_c0_seq11;comp117801_c0_seq1;comp92870_c0_seq1;comp112729_c0_seq1;comp121277_c0_seq1;comp131865_c1_seq1;comp104917_c0_seq1;comp135444_c0_seq3;comp36749_c0_seq1;comp115523_c0_seq1;comp115925_c0_seq1;comp122409_c0_seq5;comp102236_c0_seq1;comp28070_c0_seq1;comp131364_c0_seq5;comp44876_c0_seq1;comp104431_c0_seq1;comp136249_c0_seq1;com…	164
ko00750,Vitamin B6 metabolism	Metabolism\Metabolism of cofactors and vitamins	comp128103_c4_seq1;comp128231_c1_seq4;comp121298_c0_seq1;comp46755_c0_seq1;comp131143_c0_seq1;comp156940_c0_seq1;	6
ko04151,PI3K-Akt signaling pathway	Environmental Information Processing\Signal transduction	comp125464_c0_seq3;comp115461_c0_seq1;comp128862_c0_seq4;comp132679_c0_seq1;comp50097_c0_seq1;comp94590_c0_seq1;comp117192_c0_seq1;comp132702_c0_seq3;comp134550_c0_seq8;comp135037_c0_seq12;comp142807_c0_seq1;comp100088_c0_seq1;comp116083_c0_seq12;comp130035_c0_seq13;comp130354_c0_seq4;comp130815_c0_seq1;comp133410_c0_seq3;comp134655_c0_seq29;comp128813_c0_seq3;comp110195_c0_seq1;comp129465_c1_seq…	173
ko00072,Synthesis and degradation of ketone bodies	Metabolism\Lipid metabolism	comp65996_c0_seq1;comp65996_c1_seq1;comp119581_c0_seq2;comp135555_c0_seq5;comp118403_c0_seq5;comp131292_c3_seq4;comp128696_c0_seq3;comp39837_c0_seq2;comp42144_c0_seq1;comp49736_c0_seq1;comp79671_c0_seq1;comp111579_c0_seq1;comp120972_c1_seq1;comp122945_c0_seq2;	14
ko00480,Glutathione metabolism	Metabolism\Metabolism of other amino acids	comp103443_c0_seq1;comp122989_c0_seq1;comp125949_c0_seq15;comp116000_c0_seq1;comp119832_c2_seq22;comp125970_c0_seq1;comp133187_c0_seq2;comp120124_c0_seq2;comp130505_c0_seq1;comp126724_c0_seq1;comp131354_c0_seq4;comp51444_c0_seq1;comp83008_c0_seq2;comp99059_c0_seq1;comp99059_c1_seq1;comp100256_c0_seq1;comp100256_c1_seq1;comp106295_c0_seq1;comp111618_c0_seq1;comp124186_c0_seq3;comp141979_c0_seq1;co…	62
ko04745,Phototransduction - fly	Organismal Systems\Sensory system	comp93663_c0_seq1;comp110926_c0_seq1;comp121285_c0_seq3;comp116374_c0_seq9;comp131553_c0_seq1;comp124990_c0_seq1;comp129627_c1_seq5;comp100130_c0_seq1;comp129704_c0_seq3;comp15064_c0_seq1;comp81163_c0_seq2;comp103084_c0_seq1;comp104565_c0_seq1;comp116486_c0_seq2;comp117960_c0_seq1;comp125266_c0_seq6;comp134642_c0_seq2;comp164180_c0_seq1;comp59904_c1_seq1;comp66210_c2_seq2;comp115707_c0_seq1;comp1…	59
ko00140,Steroid hormone biosynthesis	Metabolism\Lipid metabolism	comp109298_c0_seq1;comp151596_c0_seq1;comp103404_c0_seq1;comp114473_c0_seq2;comp128424_c1_seq5;comp132488_c0_seq4;comp130428_c0_seq1;comp132367_c1_seq14;comp132755_c1_seq8;comp112665_c0_seq1;comp113095_c0_seq1;comp125277_c0_seq1;comp132494_c0_seq3;comp106978_c0_seq1;comp114391_c0_seq1;comp117540_c0_seq4;comp118308_c0_seq12;comp119326_c0_seq1;comp122864_c0_seq1;comp124349_c0_seq2;comp125599_c0_seq…	29
ko00790,Folate biosynthesis	Metabolism\Metabolism of cofactors and vitamins	comp104138_c0_seq2;comp44574_c0_seq1;comp55712_c0_seq1;comp70887_c0_seq1;comp97310_c0_seq1;comp105820_c0_seq2;comp108190_c0_seq1;comp110823_c0_seq4;comp114841_c0_seq1;comp118035_c0_seq1;comp119957_c0_seq2;comp125430_c0_seq7;comp128625_c0_seq2;comp129544_c0_seq1;comp136914_c0_seq1;comp138102_c0_seq1;comp143579_c0_seq1;comp144905_c0_seq1;comp149614_c0_seq1;comp166615_c0_seq1;comp173937_c0_seq1;comp…	33
ko00670,One carbon pool by folate	Metabolism\Metabolism of cofactors and vitamins	comp112798_c0_seq1;comp134162_c0_seq11;comp127814_c0_seq21;comp126568_c0_seq1;comp128380_c0_seq2;comp132703_c0_seq1;comp134224_c1_seq1;comp116186_c0_seq1;comp118252_c0_seq1;comp127777_c0_seq10;comp116793_c0_seq1;comp124032_c0_seq2;comp119267_c0_seq4;comp129649_c0_seq1;comp59859_c0_seq1;comp115978_c0_seq1;comp149998_c0_seq1;comp124140_c0_seq1;	18
ko00300,Lysine biosynthesis	Metabolism\Amino acid metabolism	comp120348_c0_seq2;comp7736_c0_seq1;comp81390_c0_seq2;comp126120_c0_seq3;comp130351_c0_seq3;comp133909_c0_seq1;comp158740_c0_seq1;comp129394_c0_seq1;	8
ko00940,Phenylpropanoid biosynthesis	Metabolism\Biosynthesis of other secondary metabolites	comp41762_c0_seq1;comp152709_c0_seq1;comp49429_c0_seq1;comp116578_c0_seq1;	4
ko00362,Benzoate degradation	Metabolism\Xenobiotics biodegradation and metabolism	comp128748_c0_seq1;comp128696_c0_seq3;	2
ko04612,Antigen processing and presentation	Organismal Systems\Immune system	comp110916_c0_seq1;comp44881_c0_seq1;comp92459_c0_seq1;comp98028_c0_seq1;comp98121_c0_seq1;comp99645_c0_seq1;comp102890_c0_seq1;comp107580_c0_seq1;comp108873_c0_seq1;comp114332_c0_seq1;comp121525_c0_seq1;comp121525_c1_seq1;comp121525_c2_seq1;comp121525_c4_seq1;comp122561_c0_seq1;comp122996_c0_seq1;comp126953_c0_seq1;comp132446_c0_seq8;comp145180_c0_seq1;comp151671_c0_seq1;comp171686_c0_seq1;comp2…	64
ko05152,Tuberculosis	Human Diseases\Infectious diseases	comp131813_c0_seq5;comp45705_c0_seq1;comp110420_c0_seq1;comp125450_c0_seq1;comp114498_c0_seq27;comp105904_c0_seq1;comp133524_c0_seq6;comp122937_c2_seq50;comp108657_c0_seq1;comp109498_c0_seq3;comp113981_c0_seq1;comp128411_c1_seq1;comp98476_c0_seq1;comp133677_c1_seq142;comp119982_c0_seq1;comp123944_c0_seq1;comp117731_c0_seq1;comp154699_c0_seq1;comp38858_c0_seq1;comp119490_c0_seq1;comp125986_c0_seq1…	83
ko00590,Arachidonic acid metabolism	Metabolism\Lipid metabolism	comp38327_c0_seq1;comp110160_c0_seq2;comp110342_c0_seq4;comp127165_c0_seq1;comp128330_c3_seq1;comp129542_c0_seq2;comp129894_c0_seq2;comp68410_c0_seq1;comp68410_c1_seq1;comp118835_c0_seq1;comp133975_c1_seq1;comp135764_c0_seq3;comp112504_c0_seq2;comp130217_c0_seq1;comp121059_c0_seq1;comp90409_c0_seq1;comp115769_c0_seq1;comp125169_c2_seq8;comp130378_c0_seq1;comp96534_c0_seq2;comp112539_c0_seq2;comp1…	33
ko00920,Sulfur metabolism	Metabolism\Energy metabolism	comp126627_c0_seq2;comp135519_c0_seq1;comp126071_c0_seq2;comp124411_c0_seq1;comp45705_c0_seq1;comp110420_c0_seq1;comp132430_c0_seq2;comp94269_c0_seq1;comp133344_c0_seq2;	9
ko02026,Biofilm formation - Escherichia coli	Cellular Processes\Cellular community - prokaryotes	comp119906_c0_seq1;	1
ko02020,Two-component system	Environmental Information Processing\Signal transduction	comp44574_c0_seq1;comp55712_c0_seq1;comp70887_c0_seq1;comp97310_c0_seq1;comp105820_c0_seq2;comp108190_c0_seq1;comp110823_c0_seq4;comp114841_c0_seq1;comp118035_c0_seq1;comp119957_c0_seq2;comp125430_c0_seq7;comp128625_c0_seq2;comp129544_c0_seq1;comp136914_c0_seq1;comp138102_c0_seq1;comp143579_c0_seq1;comp144905_c0_seq1;comp149614_c0_seq1;comp166615_c0_seq1;comp173937_c0_seq1;comp127491_c0_seq1;comp…	43
ko05131,Shigellosis	Human Diseases\Infectious diseases	comp88228_c0_seq1;comp114058_c0_seq3;comp116792_c0_seq1;comp122309_c1_seq16;comp125874_c0_seq1;comp130927_c1_seq2;comp152004_c0_seq1;comp132114_c1_seq1;comp135513_c0_seq7;comp69733_c0_seq2;comp79138_c0_seq1;comp125510_c1_seq1;comp133044_c0_seq1;comp54046_c0_seq1;comp130230_c0_seq1;comp112817_c0_seq1;comp39201_c0_seq1;comp110182_c0_seq2;comp98476_c0_seq1;comp133677_c1_seq142;comp126884_c1_seq10;co…	73
ko04320,Dorso-ventral axis formation	Organismal Systems\Development	comp128862_c0_seq4;comp128813_c0_seq3;comp110195_c0_seq1;comp129465_c1_seq1;comp129867_c1_seq13;comp103042_c0_seq1;comp115139_c0_seq4;comp98858_c0_seq1;comp121264_c0_seq31;comp72357_c0_seq1;comp75632_c0_seq1;comp90027_c0_seq3;comp94445_c0_seq1;comp95374_c0_seq3;comp105378_c1_seq2;comp114276_c0_seq1;comp116945_c0_seq2;comp118118_c0_seq1;comp118524_c1_seq1;comp123817_c0_seq1;comp125684_c0_seq8;comp…	88
ko05164,Influenza A	Human Diseases\Infectious diseases	comp51447_c0_seq1;comp67738_c0_seq1;comp95091_c0_seq1;comp95459_c0_seq1;comp97058_c0_seq1;comp112515_c1_seq2;comp114586_c0_seq5;comp117786_c0_seq1;comp118519_c0_seq1;comp119423_c0_seq2;comp120809_c1_seq3;comp129468_c0_seq3;comp132693_c0_seq7;comp138465_c0_seq1;comp143658_c0_seq1;comp146597_c0_seq1;comp162097_c0_seq1;comp131665_c0_seq2;comp44881_c0_seq1;comp92459_c0_seq1;comp98028_c0_seq1;comp9812…	121
ko04015,Rap1 signaling pathway	Environmental Information Processing\Signal transduction	comp86066_c0_seq1;comp137349_c0_seq1;comp108352_c0_seq1;comp53028_c0_seq1;comp65972_c0_seq1;comp96648_c0_seq2;comp117449_c0_seq2;comp120104_c0_seq11;comp32793_c0_seq1;comp124941_c0_seq13;comp137748_c0_seq1;comp138748_c0_seq1;comp152896_c0_seq1;comp15064_c0_seq1;comp81163_c0_seq2;comp103084_c0_seq1;comp104565_c0_seq1;comp116486_c0_seq2;comp117960_c0_seq1;comp125266_c0_seq6;comp134642_c0_seq2;comp1…	159
ko05014,Amyotrophic lateral sclerosis (ALS)	Human Diseases\Neurodegenerative diseases	comp94305_c0_seq4;comp113748_c0_seq1;comp110082_c0_seq2;comp45705_c0_seq1;comp110420_c0_seq1;comp5737_c0_seq1;comp98706_c0_seq1;comp105620_c0_seq1;comp122620_c0_seq1;comp125031_c0_seq1;comp130170_c0_seq5;comp133423_c0_seq1;comp116805_c0_seq2;comp116098_c0_seq6;comp43606_c0_seq1;comp67212_c0_seq1;comp72207_c0_seq1;comp76221_c0_seq1;comp98019_c0_seq3;comp104779_c0_seq1;comp104779_c1_seq1;comp117651…	46
ko04916,Melanogenesis	Organismal Systems\Endocrine system	comp53062_c0_seq2;comp131187_c0_seq19;comp110306_c0_seq1;comp118155_c0_seq2;comp125268_c1_seq1;comp143129_c0_seq1;comp131247_c0_seq6;comp114370_c0_seq1;comp130573_c0_seq8;comp131291_c0_seq1;comp122789_c0_seq11;comp125091_c0_seq1;comp126135_c1_seq1;comp109498_c0_seq3;comp113981_c0_seq1;comp128411_c1_seq1;comp122650_c0_seq2;comp68150_c0_seq1;comp3993_c0_seq1;comp50827_c0_seq1;comp110996_c1_seq2;com…	64
ko01521,EGFR tyrosine kinase inhibitor resistance	Human Diseases\Drug resistance	comp128862_c0_seq4;comp132679_c0_seq1;comp105904_c0_seq1;comp98476_c0_seq1;comp133677_c1_seq142;comp125932_c0_seq2;comp135196_c0_seq10;comp127328_c0_seq4;comp121028_c0_seq2;comp131746_c5_seq2;comp125450_c0_seq1;comp135719_c0_seq1;comp133207_c0_seq2;comp39227_c0_seq1;comp137059_c0_seq1;comp152833_c0_seq1;comp114845_c0_seq2;comp119540_c0_seq1;comp125752_c0_seq2;comp94045_c0_seq1;comp146137_c0_seq1;…	34
ko04550,Signaling pathways regulating pluripotency of stem cells	Cellular Processes\Cellular community - eukaryotes	comp105904_c0_seq1;comp98289_c0_seq1;comp117123_c0_seq3;comp128813_c0_seq3;comp115139_c0_seq4;comp98858_c0_seq1;comp125932_c0_seq2;comp135196_c0_seq10;comp127328_c0_seq4;comp125450_c0_seq1;comp165289_c0_seq1;comp107639_c0_seq5;comp66833_c0_seq1;comp116942_c0_seq1;comp128437_c0_seq1;comp169308_c0_seq1;comp109079_c0_seq1;comp108472_c0_seq2;comp130816_c0_seq1;comp53390_c0_seq1;comp72044_c0_seq1;comp…	73
ko04728,Dopaminergic synapse	Organismal Systems\Nervous system	comp122409_c0_seq5;comp105463_c0_seq1;comp147747_c0_seq1;comp28070_c0_seq1;comp131364_c0_seq5;comp93663_c0_seq1;comp110926_c0_seq1;comp121285_c0_seq3;comp116374_c0_seq9;comp131553_c0_seq1;comp134353_c0_seq3;comp15064_c0_seq1;comp81163_c0_seq2;comp103084_c0_seq1;comp104565_c0_seq1;comp116486_c0_seq2;comp117960_c0_seq1;comp125266_c0_seq6;comp134642_c0_seq2;comp164180_c0_seq1;comp114498_c0_seq27;com…	67
ko00281,Geraniol degradation	Metabolism\Metabolism of terpenoids and polyketides	comp118490_c0_seq2;comp120885_c1_seq3;comp125720_c0_seq2;comp135555_c0_seq5;comp39237_c0_seq1;comp150291_c0_seq1;	6
ko04964,Proximal tubule bicarbonate reclamation	Organismal Systems\Excretory system	comp115100_c0_seq2;comp132159_c0_seq1;comp117171_c1_seq3;comp121757_c0_seq1;comp124835_c0_seq2;comp78875_c0_seq7;comp102019_c0_seq1;comp107556_c0_seq1;comp112206_c0_seq4;comp113972_c0_seq3;comp128730_c0_seq1;comp130371_c0_seq13;comp109449_c1_seq1;comp130997_c0_seq1;comp72618_c0_seq1;comp123555_c0_seq1;comp163820_c0_seq1;comp99136_c0_seq1;comp125543_c1_seq3;comp128191_c1_seq1;	20
ko04214,Apoptosis - fly	Cellular Processes\Cell growth and death	comp128589_c0_seq5;comp69041_c0_seq1;comp102176_c0_seq3;comp120106_c0_seq1;comp127790_c0_seq13;comp128529_c0_seq3;comp131085_c0_seq4;comp132069_c0_seq1;comp90408_c0_seq1;comp94058_c2_seq1;comp100426_c0_seq3;comp126624_c0_seq5;comp133221_c2_seq2;comp39465_c0_seq1;comp63993_c0_seq1;comp90190_c0_seq1;comp90966_c0_seq2;comp91673_c0_seq2;comp107840_c0_seq6;comp108210_c0_seq1;comp114375_c0_seq1;comp115…	113
ko03022,Basal transcription factors	Genetic Information Processing\Transcription	comp52880_c0_seq1;comp134833_c0_seq1;comp131617_c0_seq1;comp106076_c0_seq1;comp106700_c0_seq3;comp134779_c0_seq3;comp135109_c0_seq1;comp130928_c0_seq3;comp116232_c0_seq1;comp129016_c0_seq4;comp133342_c2_seq2;comp117243_c0_seq1;comp128650_c0_seq1;comp131852_c4_seq1;comp134400_c0_seq2;comp112679_c0_seq6;comp126171_c0_seq1;comp119874_c0_seq1;comp135493_c0_seq3;comp113849_c0_seq1;comp104979_c0_seq1;c…	36
ko04950,Maturity onset diabetes of the young	Human Diseases\Endocrine and metabolic diseases	comp125492_c0_seq1;comp142387_c0_seq1;comp125287_c0_seq16;comp116855_c0_seq7;	4
ko00710,Carbon fixation in photosynthetic organisms	Metabolism\Energy metabolism	comp118439_c0_seq1;comp46251_c0_seq1;comp90932_c0_seq1;comp110416_c0_seq1;comp115481_c0_seq1;comp121598_c0_seq1;comp94084_c0_seq1;comp108284_c0_seq4;comp118559_c0_seq1;comp119897_c0_seq1;comp119897_c1_seq1;comp136998_c0_seq1;comp148544_c0_seq1;comp105063_c0_seq1;comp111871_c0_seq1;comp40818_c0_seq1;comp72000_c0_seq1;comp114492_c0_seq1;comp45583_c0_seq1;comp115429_c0_seq1;comp115646_c0_seq1;comp17…	33
ko00520,Amino sugar and nucleotide sugar metabolism	Metabolism\Carbohydrate metabolism	comp36540_c0_seq1;comp54356_c0_seq1;comp78419_c0_seq1;comp91819_c0_seq2;comp93692_c0_seq1;comp94440_c1_seq2;comp103421_c0_seq1;comp103421_c1_seq1;comp105009_c0_seq1;comp107569_c0_seq1;comp110838_c0_seq1;comp110838_c1_seq3;comp117275_c0_seq1;comp121244_c0_seq2;comp126021_c0_seq5;comp127994_c0_seq1;comp128812_c0_seq1;comp128842_c0_seq3;comp129554_c1_seq1;comp134329_c0_seq9;comp135215_c0_seq1;comp13…	85
ko05219,Bladder cancer	Human Diseases\Cancers	comp129465_c1_seq1;comp129867_c1_seq13;comp103042_c0_seq1;comp115139_c0_seq4;comp98858_c0_seq1;comp94697_c0_seq2;comp98289_c0_seq1;comp117123_c0_seq3;comp119177_c0_seq3;comp127974_c0_seq3;comp133259_c0_seq1;comp133537_c0_seq10;comp133914_c1_seq2;comp98476_c0_seq1;comp133677_c1_seq142;comp128862_c0_seq4;comp128369_c0_seq7;	17
ko05146,Amoebiasis	Human Diseases\Infectious diseases	comp123400_c0_seq1;comp109400_c0_seq5;comp124987_c0_seq5;comp125713_c0_seq3;comp129711_c0_seq1;comp151555_c0_seq1;comp82789_c0_seq1;comp110221_c0_seq1;comp133799_c0_seq1;comp163719_c0_seq1;comp12472_c0_seq1;comp54199_c0_seq1;comp66753_c0_seq2;comp76476_c0_seq1;comp104786_c0_seq2;comp133546_c0_seq6;comp138069_c0_seq1;comp155806_c0_seq1;comp164630_c0_seq1;comp169740_c0_seq1;comp88000_c0_seq1;comp13…	56
ko00400,Phenylalanine, tyrosine and tryptophan biosynthesis	Metabolism\Amino acid metabolism	comp128218_c0_seq1;comp98132_c0_seq1;comp139152_c0_seq1;comp116839_c0_seq4;comp50343_c0_seq1;	5
ko01220,Degradation of aromatic compounds	Metabolism\Overview	comp36671_c0_seq1;comp107638_c0_seq2;comp120989_c0_seq1;comp127885_c0_seq1;comp78473_c0_seq1;comp107196_c0_seq2;comp110880_c0_seq1;	7
ko04931,Insulin resistance	Human Diseases\Endocrine and metabolic diseases	comp111132_c0_seq1;comp113935_c0_seq1;comp124459_c0_seq1;comp133904_c1_seq1;comp130597_c0_seq1;comp132374_c1_seq1;comp50097_c0_seq1;comp94590_c0_seq1;comp117192_c0_seq1;comp132702_c0_seq3;comp134550_c0_seq8;comp135037_c0_seq12;comp142807_c0_seq1;comp123862_c0_seq6;comp109430_c1_seq1;comp122380_c1_seq3;comp118854_c0_seq7;comp120086_c0_seq1;comp132380_c0_seq4;comp135074_c0_seq20;comp125932_c0_seq2;…	73
ko04024,cAMP signaling pathway	Environmental Information Processing\Signal transduction	comp127120_c0_seq5;comp135458_c1_seq3;comp94298_c1_seq1;comp118746_c0_seq3;comp124530_c0_seq3;comp129749_c0_seq2;comp130843_c1_seq300;comp133833_c0_seq4;comp53062_c0_seq2;comp81972_c0_seq1;comp95662_c0_seq1;comp102600_c0_seq1;comp120143_c0_seq16;comp128590_c0_seq1;comp140336_c0_seq1;comp142386_c0_seq1;comp127502_c0_seq3;comp130547_c0_seq3;comp117935_c0_seq2;comp131187_c0_seq19;comp110306_c0_seq1;…	158
ko05169,Epstein-Barr virus infection	Human Diseases\Infectious diseases	comp56094_c1_seq1;comp92130_c0_seq1;comp95343_c0_seq1;comp99909_c0_seq1;comp105763_c0_seq1;comp128504_c0_seq1;comp130025_c1_seq1;comp115365_c0_seq1;comp115807_c0_seq1;comp109257_c0_seq1;comp120823_c0_seq1;comp110152_c0_seq1;comp110128_c1_seq1;comp119189_c0_seq1;comp117830_c0_seq2;comp119801_c0_seq1;comp112831_c0_seq1;comp130650_c0_seq2;comp109995_c0_seq1;comp109995_c1_seq1;comp111935_c0_seq1;comp…	138
ko00240,Pyrimidine metabolism	Metabolism\Nucleotide metabolism	comp126422_c0_seq2;comp124560_c0_seq3;comp129959_c0_seq1;comp117448_c0_seq3;comp39206_c0_seq1;comp50829_c0_seq1;comp96962_c0_seq1;comp124696_c0_seq7;comp131173_c0_seq2;comp131257_c0_seq7;comp151454_c0_seq1;comp125566_c0_seq1;comp133059_c0_seq3;comp87170_c0_seq2;comp119764_c0_seq4;comp133253_c0_seq7;comp10318_c0_seq1;comp31633_c0_seq1;comp60553_c0_seq1;comp128940_c1_seq2;comp147521_c0_seq1;comp130…	98
ko00440,Phosphonate and phosphinate metabolism	Metabolism\Metabolism of other amino acids	comp45693_c0_seq1;comp109628_c0_seq1;comp90914_c0_seq1;comp131956_c0_seq16;comp120095_c0_seq8;	5
ko04624,Toll and Imd signaling pathway	Organismal Systems\Immune system	comp122926_c0_seq3;comp105373_c0_seq3;comp120904_c0_seq1;comp125703_c0_seq4;comp104736_c0_seq1;comp111177_c0_seq1;comp121718_c0_seq1;comp80103_c0_seq1;comp91344_c0_seq1;comp129102_c0_seq1;comp112610_c0_seq2;comp124087_c0_seq4;comp130495_c0_seq1;comp132263_c0_seq3;comp119490_c0_seq1;comp125986_c0_seq1;comp127007_c0_seq1;comp129098_c0_seq1;comp130574_c1_seq4;comp127778_c0_seq1;comp50670_c0_seq1;com…	87
ko04933,AGE-RAGE signaling pathway in diabetic complications	Human Diseases\Endocrine and metabolic diseases	comp122978_c1_seq1;comp107639_c0_seq5;comp126226_c0_seq1;comp135922_c0_seq1;comp109400_c0_seq5;comp124987_c0_seq5;comp125713_c0_seq3;comp129711_c0_seq1;comp151555_c0_seq1;comp116374_c0_seq9;comp131553_c0_seq1;comp126462_c1_seq4;comp45711_c0_seq1;comp125178_c1_seq5;comp138973_c0_seq1;comp129704_c0_seq3;comp57403_c0_seq2;comp101614_c0_seq1;comp98858_c0_seq1;comp135827_c0_seq1;comp115461_c0_seq1;com…	47
ko04750,Inflammatory mediator regulation of TRP channels	Organismal Systems\Sensory system	comp93663_c0_seq1;comp110926_c0_seq1;comp121285_c0_seq3;comp68410_c0_seq1;comp68410_c1_seq1;comp118835_c0_seq1;comp133975_c1_seq1;comp135764_c0_seq3;comp116374_c0_seq9;comp131553_c0_seq1;comp134353_c0_seq3;comp101614_c0_seq1;comp113935_c0_seq1;comp124459_c0_seq1;comp133904_c1_seq1;comp116994_c1_seq1;comp15064_c0_seq1;comp81163_c0_seq2;comp103084_c0_seq1;comp104565_c0_seq1;comp116486_c0_seq2;comp1…	49
ko03050,Proteasome	Genetic Information Processing\Folding, sorting and degradation	comp113306_c0_seq1;comp112308_c0_seq1;comp106559_c0_seq1;comp128916_c0_seq1;comp96146_c0_seq1;comp108052_c0_seq1;comp124200_c1_seq1;comp89771_c0_seq1;comp133052_c0_seq3;comp114520_c0_seq1;comp113668_c0_seq1;comp126115_c0_seq1;comp128200_c0_seq1;comp100679_c0_seq1;comp169793_c0_seq1;comp79691_c0_seq1;comp123901_c0_seq1;comp124033_c1_seq1;comp118331_c0_seq1;comp113324_c0_seq1;comp128136_c0_seq1;com…	40
ko00600,Sphingolipid metabolism	Metabolism\Lipid metabolism	comp128617_c1_seq1;comp133771_c0_seq6;comp134432_c0_seq1;comp130330_c0_seq9;comp144216_c0_seq1;comp155552_c0_seq1;comp155962_c0_seq1;comp119968_c0_seq3;comp131920_c1_seq4;comp120390_c0_seq1;comp69023_c0_seq1;comp125393_c0_seq1;comp107281_c0_seq1;comp119533_c0_seq2;comp41355_c0_seq1;comp109451_c0_seq2;comp117412_c0_seq1;comp121964_c0_seq2;comp126141_c0_seq2;comp127010_c0_seq3;comp132572_c0_seq2;co…	46
ko04113,Meiosis - yeast	Cellular Processes\Cell growth and death	comp2393_c0_seq1;comp122789_c0_seq11;comp130756_c0_seq1;comp127087_c0_seq3;comp125546_c0_seq1;comp131283_c0_seq1;comp126552_c0_seq1;comp129529_c0_seq1;comp127074_c0_seq1;comp133158_c0_seq1;comp115378_c0_seq1;comp126771_c0_seq1;comp134003_c2_seq1;comp133758_c1_seq2;comp123127_c0_seq1;comp111899_c0_seq2;comp131424_c0_seq14;comp120919_c0_seq3;comp130400_c2_seq10;comp113935_c0_seq1;comp124459_c0_seq1…	50
ko04260,Cardiac muscle contraction	Organismal Systems\Circulatory system	comp38328_c0_seq1;comp44342_c0_seq1;comp109217_c0_seq2;comp115735_c0_seq2;comp137249_c0_seq1;comp138265_c0_seq1;comp48649_c0_seq1;comp49866_c0_seq1;comp105193_c0_seq1;comp116931_c1_seq3;comp37869_c0_seq1;comp47854_c0_seq1;comp52471_c0_seq1;comp67196_c0_seq1;comp67651_c0_seq1;comp79068_c0_seq1;comp107395_c0_seq2;comp108349_c0_seq1;comp108349_c1_seq1;comp108349_c2_seq1;comp121186_c0_seq4;comp128303…	98
ko05132,Salmonella infection	Human Diseases\Infectious diseases	comp38858_c0_seq1;comp119490_c0_seq1;comp69733_c0_seq2;comp79138_c0_seq1;comp125510_c1_seq1;comp133044_c0_seq1;comp82174_c0_seq1;comp89742_c0_seq1;comp119876_c0_seq1;comp121954_c0_seq1;comp132738_c0_seq3;comp116098_c0_seq6;comp98858_c0_seq1;comp122959_c0_seq1;comp135827_c0_seq1;comp123400_c0_seq1;comp100880_c0_seq1;comp125822_c0_seq7;comp134769_c0_seq1;comp54046_c0_seq1;comp130230_c0_seq1;comp112…	74
ko05030,Cocaine addiction	Human Diseases\Substance dependence	comp122409_c0_seq5;comp105463_c0_seq1;comp147747_c0_seq1;comp28070_c0_seq1;comp131364_c0_seq5;comp102236_c0_seq1;comp53062_c0_seq2;comp79237_c0_seq3;comp107303_c0_seq2;comp140297_c0_seq1;comp117935_c0_seq2;comp114370_c0_seq1;comp122789_c0_seq11;comp124658_c0_seq1;comp108518_c0_seq1;comp125091_c0_seq1;comp126135_c1_seq1;comp135827_c0_seq1;comp123400_c0_seq1;comp121828_c0_seq1;comp103939_c0_seq1;co…	31
ko04910,Insulin signaling pathway	Organismal Systems\Endocrine system	comp50097_c0_seq1;comp94590_c0_seq1;comp117192_c0_seq1;comp132702_c0_seq3;comp134550_c0_seq8;comp135037_c0_seq12;comp142807_c0_seq1;comp123862_c0_seq6;comp127328_c0_seq4;comp125932_c0_seq2;comp135196_c0_seq10;comp127110_c0_seq14;comp125450_c0_seq1;comp94045_c0_seq1;comp146137_c0_seq1;comp124814_c0_seq4;comp113935_c0_seq1;comp124459_c0_seq1;comp133904_c1_seq1;comp130597_c0_seq1;comp132374_c1_seq1;…	95
ko00220,Arginine biosynthesis	Metabolism\Amino acid metabolism	comp108332_c0_seq1;comp126848_c0_seq2;comp130029_c2_seq1;comp128694_c0_seq8;comp128694_c1_seq1;comp43606_c0_seq1;comp67212_c0_seq1;comp72207_c0_seq1;comp76221_c0_seq1;comp98019_c0_seq3;comp104779_c0_seq1;comp104779_c1_seq1;comp117651_c0_seq1;comp123927_c1_seq1;comp130147_c0_seq16;comp128730_c0_seq1;comp130371_c0_seq13;comp82435_c0_seq1;comp97155_c0_seq2;comp100923_c0_seq1;comp114082_c0_seq1;comp1…	34
ko04720,Long-term potentiation	Organismal Systems\Nervous system	comp131187_c0_seq19;comp130573_c0_seq8;comp122789_c0_seq11;comp113935_c0_seq1;comp124459_c0_seq1;comp133904_c1_seq1;comp114498_c0_seq27;comp86066_c0_seq1;comp137349_c0_seq1;comp94305_c0_seq4;comp113748_c0_seq1;comp53028_c0_seq1;comp65972_c0_seq1;comp96648_c0_seq2;comp117449_c0_seq2;comp120104_c0_seq11;comp32793_c0_seq1;comp124941_c0_seq13;comp137748_c0_seq1;comp138748_c0_seq1;comp152896_c0_seq1;c…	49
ko00982,Drug metabolism - cytochrome P450	Metabolism\Xenobiotics biodegradation and metabolism	comp59231_c0_seq1;comp130413_c0_seq13;comp94671_c0_seq1;comp105496_c0_seq1;comp108552_c0_seq1;comp114504_c0_seq1;comp114807_c0_seq1;comp115594_c0_seq1;comp120013_c0_seq1;comp121099_c2_seq10;comp123587_c0_seq2;comp127153_c0_seq1;comp127192_c1_seq1;comp130038_c0_seq1;comp127285_c0_seq1;comp96534_c0_seq2;comp112539_c0_seq2;comp134277_c0_seq1;comp78473_c0_seq1;comp107196_c0_seq2;comp110880_c0_seq1;co…	37
ko00401,Novobiocin biosynthesis	Metabolism\Biosynthesis of other secondary metabolites	comp116839_c0_seq4;	1
ko00521,Streptomycin biosynthesis	Metabolism\Biosynthesis of other secondary metabolites	comp117934_c0_seq1;comp134591_c0_seq2;comp131365_c0_seq1;comp158676_c0_seq1;comp142534_c0_seq1;comp124615_c0_seq1;comp114775_c0_seq1;	7
ko05222,Small cell lung cancer	Human Diseases\Cancers	comp11098_c0_seq1;comp118878_c1_seq11;comp45705_c0_seq1;comp110420_c0_seq1;comp98289_c0_seq1;comp117123_c0_seq3;comp95751_c0_seq1;comp126912_c1_seq10;comp97992_c0_seq1;comp125019_c0_seq1;comp131925_c0_seq1;comp113585_c0_seq1;comp111945_c0_seq1;comp133914_c1_seq2;comp109400_c0_seq5;comp124987_c0_seq5;comp125713_c0_seq3;comp129711_c0_seq1;comp151555_c0_seq1;comp82789_c0_seq1;comp110221_c0_seq1;comp…	60
ko03013,RNA transport	Genetic Information Processing\Translation	comp132733_c0_seq1;comp126930_c0_seq13;comp117003_c0_seq1;comp130026_c1_seq6;comp121343_c0_seq1;comp78196_c0_seq2;comp102265_c0_seq1;comp126446_c0_seq1;comp127411_c0_seq2;comp122017_c0_seq7;comp129863_c0_seq1;comp121344_c0_seq1;comp39469_c0_seq1;comp86563_c0_seq2;comp106118_c0_seq5;comp131548_c0_seq4;comp155744_c0_seq1;comp123163_c0_seq1;comp128935_c0_seq6;comp29911_c0_seq2;comp39215_c0_seq1;comp…	169
ko00563,Glycosylphosphatidylinositol(GPI)-anchor biosynthesis	Metabolism\Glycan biosynthesis and metabolism	comp121610_c0_seq2;comp121187_c0_seq6;comp118891_c0_seq2;comp124380_c0_seq3;comp125583_c1_seq1;comp122156_c0_seq7;comp127026_c0_seq1;comp133582_c1_seq3;comp123334_c0_seq1;comp118677_c0_seq8;comp121162_c0_seq3;comp127754_c0_seq6;comp120091_c0_seq1;comp119671_c0_seq2;comp124142_c0_seq1;comp126420_c1_seq4;comp127406_c0_seq2;comp134529_c0_seq4;comp132711_c0_seq2;comp135174_c0_seq1;comp118150_c0_seq2;	21
ko05110,Vibrio cholerae infection	Human Diseases\Infectious diseases	comp121084_c0_seq1;comp56944_c0_seq1;comp128162_c0_seq1;comp154845_c0_seq1;comp118027_c0_seq1;comp39195_c0_seq1;comp105135_c0_seq1;comp99332_c0_seq1;comp83909_c0_seq1;comp107750_c0_seq1;comp129155_c0_seq2;comp93473_c0_seq4;comp120710_c0_seq1;comp130740_c1_seq7;comp109972_c0_seq1;comp109828_c0_seq2;comp122835_c0_seq1;comp108226_c0_seq1;comp115623_c0_seq1;comp149981_c0_seq1;comp102996_c0_seq1;comp1…	69
ko03320,PPAR signaling pathway	Organismal Systems\Endocrine system	comp117020_c0_seq8;comp125628_c0_seq2;comp114330_c0_seq3;comp99532_c0_seq1;comp115634_c0_seq7;comp11098_c0_seq1;comp118878_c1_seq11;comp112506_c0_seq1;comp39212_c0_seq1;comp98975_c0_seq1;comp114377_c0_seq1;comp130054_c0_seq11;comp131818_c0_seq5;comp134099_c0_seq1;comp171333_c0_seq1;comp42503_c0_seq1;comp78407_c0_seq1;comp78615_c0_seq2;comp112210_c0_seq1;comp112210_c1_seq3;comp117959_c0_seq2;comp1…	48
ko00190,Oxidative phosphorylation	Metabolism\Energy metabolism	comp44876_c0_seq1;comp104431_c0_seq1;comp136249_c0_seq1;comp149678_c0_seq1;comp58459_c0_seq1;comp74147_c0_seq1;comp91591_c0_seq1;comp94449_c0_seq1;comp96729_c0_seq1;comp135807_c0_seq1;comp136873_c0_seq1;comp137307_c0_seq1;comp45057_c0_seq1;comp51286_c0_seq1;comp52740_c0_seq1;comp97881_c0_seq1;comp103610_c0_seq2;comp148362_c0_seq1;comp133662_c0_seq1;comp81095_c0_seq1;comp39192_c0_seq1;comp109245_c…	153
ko00100,Steroid biosynthesis	Metabolism\Lipid metabolism	comp2702_c0_seq1;comp109132_c0_seq1;comp130011_c0_seq1;comp131086_c0_seq5;comp127292_c1_seq1;comp119017_c0_seq1;comp112549_c0_seq1;comp118152_c0_seq1;comp120758_c0_seq1;comp122129_c0_seq1;comp123883_c0_seq1;comp114565_c0_seq1;comp166054_c0_seq1;	13
ko03460,Fanconi anemia pathway	Genetic Information Processing\Replication and repair	comp131934_c0_seq3;comp129216_c0_seq1;comp132617_c2_seq1;comp116936_c0_seq4;comp115383_c0_seq1;comp93363_c0_seq1;comp128465_c0_seq1;comp125609_c0_seq2;comp135302_c0_seq1;comp109176_c0_seq2;comp146275_c0_seq1;comp119609_c0_seq1;comp134090_c0_seq1;comp135522_c0_seq3;comp129518_c0_seq1;comp134863_c1_seq2;comp129558_c0_seq1;comp131030_c2_seq1;comp133933_c0_seq3;comp128449_c0_seq1;comp126478_c0_seq8;c…	42
ko04621,NOD-like receptor signaling pathway	Organismal Systems\Immune system	comp130337_c0_seq1;comp129098_c0_seq1;comp123400_c0_seq1;comp117864_c0_seq1;comp125572_c0_seq7;comp127257_c1_seq1;comp98858_c0_seq1;comp122959_c0_seq1;comp116098_c0_seq6;comp135827_c0_seq1;comp131428_c0_seq2;comp124252_c0_seq1;comp92530_c0_seq1;comp100593_c0_seq1;comp116261_c0_seq1;comp119631_c0_seq1;comp125948_c0_seq1;comp38256_c0_seq1;comp123874_c0_seq1;comp118879_c0_seq1;comp134651_c0_seq1;com…	63
ko04330,Notch signaling pathway	Environmental Information Processing\Signal transduction	comp123591_c0_seq1;comp154957_c0_seq1;comp125239_c0_seq4;comp44186_c0_seq1;comp80065_c0_seq1;comp103389_c0_seq3;comp121416_c0_seq18;comp135339_c0_seq1;comp120298_c0_seq4;comp117153_c0_seq2;comp116408_c0_seq1;comp123155_c0_seq17;comp129490_c0_seq1;comp41409_c0_seq1;comp128215_c0_seq13;comp133977_c0_seq6;comp134063_c2_seq1;comp102184_c0_seq1;comp134407_c0_seq1;comp108062_c0_seq1;comp111215_c0_seq3;…	32
ko04930,Type II diabetes mellitus	Human Diseases\Endocrine and metabolic diseases	comp50097_c0_seq1;comp94590_c0_seq1;comp117192_c0_seq1;comp132702_c0_seq3;comp134550_c0_seq8;comp135037_c0_seq12;comp142807_c0_seq1;comp123862_c0_seq6;comp127328_c0_seq4;comp125932_c0_seq2;comp135196_c0_seq10;comp98858_c0_seq1;comp135719_c0_seq1;comp116657_c0_seq1;comp120158_c0_seq6;comp122959_c0_seq1;comp57403_c0_seq2;comp101614_c0_seq1;comp117934_c0_seq1;comp134591_c0_seq2;comp107557_c0_seq1;co…	28
ko04210,Apoptosis	Cellular Processes\Cell growth and death	comp131813_c0_seq5;comp17431_c0_seq1;comp73734_c0_seq1;comp80051_c0_seq1;comp124922_c0_seq5;comp126730_c0_seq3;comp128232_c0_seq31;comp130858_c0_seq2;comp130888_c0_seq21;comp37152_c0_seq1;comp70771_c0_seq1;comp131625_c0_seq10;comp45705_c0_seq1;comp110420_c0_seq1;comp13694_c0_seq1;comp25525_c0_seq1;comp39114_c0_seq1;comp39718_c0_seq1;comp67459_c0_seq1;comp71739_c0_seq1;comp76428_c0_seq1;comp85989_…	126
ko04710,Circadian rhythm	Organismal Systems\Environmental adaptation	comp125540_c0_seq1;comp128480_c0_seq1;comp129050_c1_seq4;comp116325_c0_seq1;comp38187_c0_seq1;comp142969_c0_seq1;comp53457_c0_seq1;comp115728_c0_seq1;comp77720_c0_seq1;comp99302_c0_seq1;comp127778_c0_seq1;comp93124_c0_seq1;comp117186_c0_seq1;comp126391_c0_seq6;comp133683_c0_seq1;comp171322_c0_seq1;comp119670_c0_seq22;comp41601_c0_seq1;comp124240_c0_seq3;	19
ko01523,Antifolate resistance	Human Diseases\Drug resistance	comp126269_c0_seq1;comp112874_c0_seq1;comp120405_c0_seq1;comp119267_c0_seq4;comp112798_c0_seq1;comp126568_c0_seq1;comp128380_c0_seq2;comp59859_c0_seq1;comp115978_c0_seq1;comp149998_c0_seq1;comp132703_c0_seq1;comp134224_c1_seq1;comp116186_c0_seq1;comp130337_c0_seq1;comp123400_c0_seq1;comp2527_c0_seq1;comp2798_c0_seq1;comp74414_c0_seq2;comp112468_c1_seq4;comp112977_c0_seq1;comp127652_c0_seq3;comp12…	33
ko04911,Insulin secretion	Organismal Systems\Endocrine system	comp119393_c0_seq10;comp127647_c2_seq1;comp133760_c0_seq1;comp117171_c1_seq3;comp121757_c0_seq1;comp124835_c0_seq2;comp78875_c0_seq7;comp102019_c0_seq1;comp107556_c0_seq1;comp112206_c0_seq4;comp113972_c0_seq3;comp38328_c0_seq1;comp44342_c0_seq1;comp109217_c0_seq2;comp115735_c0_seq2;comp137249_c0_seq1;comp138265_c0_seq1;comp114498_c0_seq27;comp117522_c0_seq4;comp122176_c1_seq1;comp134553_c0_seq1;c…	74
ko04512,ECM-receptor interaction	Environmental Information Processing\Signaling molecules and interaction	comp121485_c0_seq1;comp109400_c0_seq5;comp124987_c0_seq5;comp125713_c0_seq3;comp129711_c0_seq1;comp151555_c0_seq1;comp116011_c0_seq1;comp82789_c0_seq1;comp110221_c0_seq1;comp133799_c0_seq1;comp163719_c0_seq1;comp12472_c0_seq1;comp54199_c0_seq1;comp66753_c0_seq2;comp76476_c0_seq1;comp104786_c0_seq2;comp133546_c0_seq6;comp138069_c0_seq1;comp155806_c0_seq1;comp164630_c0_seq1;comp169740_c0_seq1;comp8…	70
ko01210,2-Oxocarboxylic acid metabolism	Metabolism\Overview	comp112469_c0_seq1;comp114555_c0_seq1;comp125597_c0_seq1;comp111288_c0_seq1;comp115082_c0_seq1;comp118787_c1_seq1;comp119279_c0_seq1;comp130163_c0_seq3;comp128218_c0_seq1;comp98132_c0_seq1;comp139152_c0_seq1;comp128942_c0_seq1;comp90923_c0_seq2;comp109159_c0_seq1;comp122630_c0_seq1;comp7736_c0_seq1;comp81390_c0_seq2;comp126120_c0_seq3;comp130351_c0_seq3;comp133909_c0_seq1;comp158740_c0_seq1;comp5…	23
ko05321,Inflammatiory bowel disease (IBD)	Human Diseases\Immune diseases	comp38858_c0_seq1;comp123400_c0_seq1;comp135827_c0_seq1;comp107639_c0_seq5;	4
ko00380,Tryptophan metabolism	Metabolism\Amino acid metabolism	comp119743_c0_seq3;comp41035_c0_seq1;comp110213_c0_seq1;comp124171_c0_seq1;comp49571_c0_seq1;comp95110_c0_seq1;comp115844_c0_seq8;comp130981_c0_seq2;comp141564_c0_seq1;comp128748_c0_seq1;comp15023_c0_seq1;comp122170_c0_seq1;comp113963_c0_seq1;comp39237_c0_seq1;comp150291_c0_seq1;comp128696_c0_seq3;comp129973_c1_seq1;comp7736_c0_seq1;comp81390_c0_seq2;comp126120_c0_seq3;comp130351_c0_seq3;comp1339…	39
ko04977,Vitamin digestion and absorption	Organismal Systems\Digestive system	comp23360_c0_seq1;comp51307_c0_seq1;comp73485_c0_seq2;comp76544_c0_seq1;comp77706_c0_seq1;comp94222_c0_seq1;comp107789_c0_seq1;comp115340_c0_seq2;comp115455_c0_seq1;comp116507_c0_seq1;comp116834_c0_seq2;comp123473_c0_seq3;comp130366_c0_seq2;comp133481_c0_seq2;comp2527_c0_seq1;comp2798_c0_seq1;comp74414_c0_seq2;comp112468_c1_seq4;comp112977_c0_seq1;comp127652_c0_seq3;comp127652_c1_seq2;comp129234_…	42
ko04360,Axon guidance	Organismal Systems\Development	comp38982_c0_seq1;comp64456_c1_seq1;comp107533_c0_seq2;comp126462_c1_seq4;comp124990_c0_seq1;comp129627_c1_seq5;comp94305_c0_seq4;comp113748_c0_seq1;comp51726_c0_seq1;comp127569_c0_seq2;comp98476_c0_seq1;comp133677_c1_seq142;comp69733_c0_seq2;comp79138_c0_seq1;comp125510_c1_seq1;comp133044_c0_seq1;comp82174_c0_seq1;comp89742_c0_seq1;comp119876_c0_seq1;comp121954_c0_seq1;comp132738_c0_seq3;comp130…	118
ko04919,Thyroid hormone signaling pathway	Organismal Systems\Endocrine system	comp122789_c0_seq11;comp129465_c1_seq1;comp129867_c1_seq13;comp115139_c0_seq4;comp98858_c0_seq1;comp116131_c0_seq1;comp127614_c0_seq2;comp122253_c0_seq1;comp130271_c0_seq1;comp11098_c0_seq1;comp118878_c1_seq11;comp130706_c0_seq3;comp116624_c0_seq63;comp109498_c0_seq3;comp113981_c0_seq1;comp128411_c1_seq1;comp135731_c1_seq2;comp127421_c0_seq1;comp127421_c2_seq13;comp134800_c0_seq2;comp130148_c0_se…	107
ko04978,Mineral absorption	Organismal Systems\Digestive system	comp114156_c1_seq3;comp67590_c0_seq1;comp112840_c0_seq1;comp116882_c0_seq2;comp122493_c0_seq1;comp115100_c0_seq2;comp132159_c0_seq1;comp132315_c0_seq1;comp132731_c0_seq10;comp134314_c0_seq5;comp117171_c1_seq3;comp121757_c0_seq1;comp124835_c0_seq2;comp78875_c0_seq7;comp102019_c0_seq1;comp107556_c0_seq1;comp112206_c0_seq4;comp113972_c0_seq3;comp125260_c0_seq4;comp135278_c0_seq5;comp39440_c0_seq1;co…	33
ko05204,Chemical carcinogenesis	Human Diseases\Cancers	comp112504_c0_seq2;comp130217_c0_seq1;comp106646_c0_seq1;comp119699_c0_seq5;comp94671_c0_seq1;comp105496_c0_seq1;comp108552_c0_seq1;comp114504_c0_seq1;comp114807_c0_seq1;comp115594_c0_seq1;comp120013_c0_seq1;comp121099_c2_seq10;comp123587_c0_seq2;comp127153_c0_seq1;comp127192_c1_seq1;comp130038_c0_seq1;comp127285_c0_seq1;comp96534_c0_seq2;comp112539_c0_seq2;comp134277_c0_seq1;comp115769_c0_seq1;c…	41
ko04064,NF-kappa B signaling pathway	Environmental Information Processing\Signal transduction	comp126462_c1_seq4;comp119982_c0_seq1;comp119490_c0_seq1;comp127007_c0_seq1;comp125986_c0_seq1;comp113693_c0_seq2;comp101765_c0_seq1;comp38858_c0_seq1;comp117864_c0_seq1;comp125572_c0_seq7;comp127257_c1_seq1;comp130337_c0_seq1;comp112619_c0_seq3;comp133182_c0_seq6;comp129098_c0_seq1;comp123400_c0_seq1;comp110082_c0_seq2;comp112504_c0_seq2;comp130217_c0_seq1;comp121174_c0_seq2;comp80806_c0_seq1;	21
ko04922,Glucagon signaling pathway	Organismal Systems\Endocrine system	comp125450_c0_seq1;comp53062_c0_seq2;comp110306_c0_seq1;comp118155_c0_seq2;comp125268_c1_seq1;comp143129_c0_seq1;comp122789_c0_seq11;comp124658_c0_seq1;comp108518_c0_seq1;comp125091_c0_seq1;comp126135_c1_seq1;comp113068_c0_seq2;comp125974_c0_seq2;comp116042_c0_seq10;comp116042_c1_seq2;comp109498_c0_seq3;comp113981_c0_seq1;comp128411_c1_seq1;comp93663_c0_seq1;comp110926_c0_seq1;comp121285_c0_seq3;…	70
ko05166,HTLV-I infection	Human Diseases\Infectious diseases	comp119393_c0_seq10;comp127647_c2_seq1;comp133760_c0_seq1;comp42333_c0_seq1;comp51858_c0_seq1;comp65601_c0_seq1;comp93709_c0_seq1;comp93709_c1_seq1;comp110396_c0_seq1;comp132196_c0_seq4;comp133039_c2_seq2;comp137678_c0_seq1;comp148014_c0_seq1;comp98289_c0_seq1;comp117123_c0_seq3;comp79107_c0_seq1;comp79107_c1_seq1;comp125291_c0_seq3;comp131011_c2_seq1;comp131253_c1_seq1;comp142465_c0_seq1;comp146…	161
ko05224,Breast cancer	Human Diseases\Cancers	comp135827_c0_seq1;comp98289_c0_seq1;comp117123_c0_seq3;comp68150_c0_seq1;comp3993_c0_seq1;comp50827_c0_seq1;comp110996_c1_seq2;comp157687_c0_seq1;comp125464_c0_seq3;comp128862_c0_seq4;comp116119_c0_seq1;comp128813_c0_seq3;comp110195_c0_seq1;comp129465_c1_seq1;comp129867_c1_seq13;comp103042_c0_seq1;comp115139_c0_seq4;comp98858_c0_seq1;comp125932_c0_seq2;comp135196_c0_seq10;comp127328_c0_seq4;comp…	62
ko03008,Ribosome biogenesis in eukaryotes	Genetic Information Processing\Translation	comp80806_c0_seq1;comp121174_c0_seq2;comp121518_c1_seq1;comp130239_c0_seq8;comp108031_c0_seq1;comp101270_c0_seq1;comp128373_c0_seq3;comp128295_c1_seq1;comp129329_c0_seq1;comp131873_c0_seq1;comp119398_c0_seq1;comp131339_c0_seq1;comp124055_c0_seq1;comp113012_c0_seq1;comp135011_c0_seq4;comp116079_c0_seq1;comp112629_c0_seq1;comp108687_c0_seq1;comp129087_c0_seq1;comp125762_c0_seq1;comp121845_c0_seq1;c…	84
ko05231,Choline metabolism in cancer	Human Diseases\Cancers	comp128862_c0_seq4;comp128813_c0_seq3;comp110195_c0_seq1;comp129465_c1_seq1;comp129867_c1_seq13;comp115139_c0_seq4;comp98858_c0_seq1;comp122959_c0_seq1;comp68410_c0_seq1;comp68410_c1_seq1;comp118835_c0_seq1;comp125932_c0_seq2;comp135196_c0_seq10;comp127328_c0_seq4;comp127110_c0_seq14;comp125450_c0_seq1;comp134860_c0_seq4;comp135328_c0_seq1;comp135719_c0_seq1;comp133207_c0_seq2;comp134354_c0_seq24…	100
ko00785,Lipoic acid metabolism	Metabolism\Metabolism of cofactors and vitamins	comp134531_c0_seq5;comp137853_c0_seq1;comp131880_c1_seq36;comp123350_c0_seq3;	4
ko05220,Chronic myeloid leukemia	Human Diseases\Cancers	comp123570_c0_seq7;comp126201_c0_seq1;comp115659_c0_seq2;comp124689_c0_seq2;comp125932_c0_seq2;comp135196_c0_seq10;comp127328_c0_seq4;comp125450_c0_seq1;comp110082_c0_seq2;comp130337_c0_seq1;comp129098_c0_seq1;comp123400_c0_seq1;comp133537_c0_seq10;comp135922_c0_seq1;comp128813_c0_seq3;comp122380_c1_seq3;comp110195_c0_seq1;comp129465_c1_seq1;comp129867_c1_seq13;comp103042_c0_seq1;comp115139_c0_se…	40
ko04658,Th1 and Th2 cell differentiation	Organismal Systems\Immune system	comp123591_c0_seq1;comp154957_c0_seq1;comp111215_c0_seq3;comp120298_c0_seq4;comp123400_c0_seq1;comp105904_c0_seq1;comp126462_c1_seq4;comp94305_c0_seq4;comp113748_c0_seq1;comp130337_c0_seq1;comp129098_c0_seq1;comp98858_c0_seq1;comp116098_c0_seq6;comp122959_c0_seq1;comp135827_c0_seq1;comp131606_c1_seq17;comp125239_c0_seq4;comp44186_c0_seq1;comp80065_c0_seq1;comp103389_c0_seq3;comp121416_c0_seq18;co…	22
ko00311,Penicillin and cephalosporin biosynthesis	Metabolism\Biosynthesis of other secondary metabolites	comp131263_c0_seq19;	1
ko00460,Cyanoamino acid metabolism	Metabolism\Metabolism of other amino acids	comp103443_c0_seq1;comp122989_c0_seq1;comp125949_c0_seq15;comp126568_c0_seq1;comp128380_c0_seq2;	5
ko04920,Adipocytokine signaling pathway	Organismal Systems\Endocrine system	comp135719_c0_seq1;comp122959_c0_seq1;comp130337_c0_seq1;comp129098_c0_seq1;comp123400_c0_seq1;comp123862_c0_seq6;comp125450_c0_seq1;comp114377_c0_seq1;comp130054_c0_seq11;comp131818_c0_seq5;comp134099_c0_seq1;comp171333_c0_seq1;comp42503_c0_seq1;comp78407_c0_seq1;comp78615_c0_seq2;comp112210_c0_seq1;comp112210_c1_seq3;comp117959_c0_seq2;comp127780_c0_seq4;comp105904_c0_seq1;comp93124_c0_seq1;com…	44
