# Supplementary material
Source: MDPI journal article supplement (https://www.mdpi.com/2077-1312/10/6/737)
Supplement: s1 [file s1 › Table S4.xlsx]

## Sheet: The analysis of DEGs
id	baseMean	baseMean_Sample_testis	baseMean_Sample_ovary	foldChange	log2FoldChange	pval	padj	up_down	fpkm_Sample_testis	fpkm_Sample_ovary	length	NR.id.and.Des	NR.e.value	swiss.id	swiss.e.value	swiss.Des	KOG.id	KOG.e.value	KOG.Des	kegg.id	kegg.term	kegg_hits_numbers	KO_ENTRY	KO_name	KO_Definition	GO.id	GO.term
comp100006_c0_seq1	2117.43	4229.21	5.65685	0.00133757	-9.54617	0.00254458	0.410115	Down	131.253	0.0983668	1451
comp100010_c0_seq1	1297.54	2595.08	0	0	#NAME?	0.000731609	0.33299	Down	82.1755	0	1422	gi|954185902|gb|KRW98778.1|hypothetical protein PPERSA_03913 [Pseudocohnilembus persalinus]	3e-18
comp100130_c0_seq1	961.312	1907.07	15.5563	0.00815721	-6.93771	0.0152813	0.995178	Down	24.8337	0.100799	3459	gi|768438684|ref|XP_011560938.1|PREDICTED: transient-receptor-potential-like protein [Plutella xylostella]	3e-85	sp|P48994|TRPL_DROME	1e-67	Transient-receptor-potential-like protein OS=Drosophila melanogaster GN=trpl PE=1 SV=2	KOG3609	2e-68	Receptor-activated Ca2+-permeable cation channels (STRPC family)	ko04745	Phototransduction - fly	1	K13803	TRPL	transient-receptor-potential-like protein	GO:0034703;GO:0005829;GO:0030425;GO:0016027;GO:0016021;GO:0005887;GO:0005622;GO:0005886;GO:0016028;GO:0035997;GO:0005262;GO:0005516;GO:0005261;GO:0042802;GO:0015075;GO:0010461;GO:0046982;GO:0015279;GO:0007589;GO:0070588;GO:0006816;GO:0019722;GO:0006812;GO:0071454;GO:0051480;GO:0050908;GO:0006811;GO:0006828;GO:0007603;GO:0009416;GO:0007605	cation channel complex|cytosol|dendrite|inaD signaling complex|integral component of membrane|integral component of plasma membrane|intracellular|plasma membrane|rhabdomere|rhabdomere microvillus membrane|calcium channel activity|calmodulin binding|cation channel activity|identical protein binding|ion transmembrane transporter activity|light-activated ion channel activity|protein heterodimerizati…
comp100192_c0_seq2	78.4889	0	156.978	Inf	Inf	0.048707	1	Up	0	8.56791	424
comp100234_c1_seq1	219.203	2.82843	435.578	154	7.26679	0.0362542	1	Up	0.209915	15.3533	655
comp100250_c0_seq1	181.726	0	363.453	Inf	Inf	0.0135842	0.931045	Up	0	17.4868	480
comp100282_c0_seq1	2523.31	5045.21	1.41421	0.000280308	-11.8007	0.000861508	0.33299	Down	266.369	0.0508754	853
comp100757_c0_seq1	121.622	0	243.245	Inf	Inf	0.0268729	1	Up	0	9.78518	574
comp100912_c0_seq1	1203.5	1.41421	2405.58	1701	10.7322	0.00122936	0.34072	Up	0.0560306	59.1321	938
comp100979_c0_seq1	1983.08	3942.12	24.0416	0.00609865	-7.35729	0.0106548	0.81998	Down	273.112	0.87131	650
comp101413_c0_seq1	103.945	0	207.889	Inf	Inf	0.0338251	1	Up	0	12.3867	388
comp101672_c0_seq1	720.895	1441.79	0	0	#NAME?	0.00167903	0.370286	Down	75.8655	0	856
comp101778_c0_seq1	6367.85	6.36396	12729.3	2000.22	10.9659	0.00249329	0.410115	Up	0.438426	433.45	677
comp101885_c0_seq1	13549.6	7.07107	27092.1	3831.4	11.9037	0.00703665	0.660157	Up	0.27114	512.772	1218
comp101947_c1_seq1	3651.85	2.12132	7301.58	3442	11.749	0.000797282	0.33299	Up	0.101841	196.165	858
comp102076_c0_seq2	153.796	0.707107	306.884	434	8.76155	0.0319799	1	Up	0.0604725	10.2011	694
comp102132_c0_seq1	1478.91	3.53553	2954.29	835.6	9.70667	0.00204753	0.383236	Up	0.267418	126.576	538
comp102270_c0_seq1	1852.62	3681.2	24.0416	0.00653093	-7.2585	0.0113325	0.844692	Down	114.568	0.377464	1447	gi|884463624|gb|AKQ22256.1|CTLDcp1 [Macrobrachium nipponense]	0
comp102385_c0_seq2	85.5599	0	171.12	Inf	Inf	0.04386	1	Up	0	4.6176	851
comp102405_c1_seq1	451.488	10.6066	892.369	84.1333	6.39461	0.0301671	1	Up	0.812226	36.0316	571
comp102632_c0_seq1	1049.35	2098.69	0	0	#NAME?	0.000958476	0.33299	Down	291.757	0	324
comp102788_c0_seq1	247.134	4.94975	489.318	98.8571	6.62727	0.0437827	1	Up	0.562891	29.7306	379
comp102873_c0_seq1	566.746	3.53553	1129.96	319.6	8.32012	0.007765	0.690265	Up	0.134999	23.1234	1126
comp102904_c0_seq1	429.921	0	859.842	Inf	Inf	0.00216468	0.394932	Up	0	43.456	456
comp102961_c0_seq1	1481.39	2962.78	0	0	#NAME?	0.000630214	0.33299	Down	194.498	0	686	gi|999978468|gb|KXJ17642.1|Agrin [Exaiptasia pallida]	6e-06
comp103038_c0_seq1	283.55	0	567.1	Inf	Inf	0.00532983	0.566652	Up	0	24.494	534
comp103134_c0_seq1	424.971	5.65685	844.285	149.25	7.22159	0.0190116	1	Up	0.629035	45.2864	430
comp103232_c0_seq1	157.685	0	315.37	Inf	Inf	0.0176774	1	Up	0	5.50991	1320
comp103247_c0_seq1	427.446	852.064	2.82843	0.0033195	-8.23482	0.0125726	0.897417	Down	58.5733	0.0945199	655
comp103301_c0_seq1	155.21	310.42	0	0	#NAME?	0.030255	1	Down	25.1438	0	556
comp103316_c0_seq1	6517.76	9.19239	13026.3	1417.08	10.4687	0.00343767	0.470057	Up	0.432152	310.544	967
comp103325_c0_seq1	119.501	0	239.002	Inf	Inf	0.0275935	1	Up	0	17.1179	322
comp103387_c0_seq1	926.663	1853.33	0	0	#NAME?	0.00114114	0.34072	Down	158.403	0	527
comp103648_c0_seq1	1197.13	4.24264	2390.02	563.333	9.13785	0.00308606	0.445609	Up	0.288376	84.2268	654
comp103728_c0_seq2	98.9949	0	197.99	Inf	Inf	0.0362117	1	Up	0	4.31423	1059
comp103828_c0_seq1	1172.74	2.12132	2343.35	1104.67	10.1094	0.0017305	0.374428	Up	0.172498	89.0136	607
comp103845_c0_seq1	3671.3	2.82843	7339.77	2595	11.3415	0.0010004	0.33299	Up	0.347861	494.757	342
comp103846_c0_seq1	389.616	1.41421	777.817	550	9.10329	0.00770601	0.689685	Up	0.0705916	23.296	769
comp103847_c0_seq1	4049.95	6.36396	8093.54	1271.78	10.3126	0.0020228	0.383236	Up	0.482118	300.952	620
comp104043_c0_seq1	390.323	2.82843	777.817	275	8.10329	0.012544	0.896219	Up	0.212326	29.2531	613
comp104073_c0_seq1	28414	56813.9	14.1421	0.00024892	-11.972	0.0384397	1	Down	1988.03	0.250106	1287	gi|1005446363|ref|XP_015760475.1|PREDICTED: probable serine/threonine-protein kinase DDB_G0271682 [Acropora digitifera]	9e-08	sp|Q8SQW2|CTK1_ENCCU	5e-09	Probable CTD kinase subunit alpha homolog OS=Encephalitozoon cuniculi (strain GB-M1) GN=CTK1 PE=3 SV=1	KOG0600	1e-09	Cdc2-related protein kinase	ko04630;ko05206;ko05221;ko04933	Jak-STAT signaling pathway|MicroRNAs in cancer|Acute myeloid leukemia|AGE-RAGE signaling pathway in diabetic complications	4	K04702	PIM1	proto-oncogene serine/threonine-protein kinase Pim-1	GO:0005730;GO:0005524;GO:0008353;GO:0006397;GO:0006351	nucleolus|ATP binding|RNA polymerase II carboxy-terminal domain kinase activity|mRNA processing|transcription, DNA-templated
comp104108_c0_seq1	2195.57	0	4391.13	Inf	Inf	0.000215022	0.33299	Up	0	290.087	349
comp104131_c0_seq1	289.207	0	578.413	Inf	Inf	0.00510418	0.554323	Up	0	29.9173	446
comp104274_c0_seq1	474.115	948.23	0	0	#NAME?	0.00350202	0.472395	Down	69.6536	0	613
comp104279_c0_seq2	87.6812	0	175.362	Inf	Inf	0.0425268	1	Up	0	6.14394	657
comp104323_c0_seq2	544.472	0	1088.94	Inf	Inf	0.0013476	0.342918	Up	0	42.8364	586
comp104402_c0_seq1	314.663	7.07107	622.254	88	6.45943	0.0384642	1	Up	0.959375	41.4638	346
comp104421_c0_seq2	168.999	0	337.997	Inf	Inf	0.0156011	1	Up	0	8.78513	888
comp104500_c0_seq2	138.593	0	277.186	Inf	Inf	0.0219375	1	Up	0	11.1999	570
comp104538_c0_seq1	280.368	560.736	0	0	#NAME?	0.0100084	0.788242	Down	14.3445	0	1760
comp104581_c0_seq1	2173.65	0	4347.29	Inf	Inf	0.000216309	0.33299	Up	0	135.418	740
comp104643_c0_seq1	284.257	4.24264	564.271	133	7.05528	0.030598	1	Up	0.11756	8.65777	1504	gi|815795186|ref|XP_012218240.1|PREDICTED: lysosome-associated membrane glycoprotein 1 [Linepithema humile]	3e-17	sp|P14562|LAMP1_RAT	1e-08	Lysosome-associated membrane glycoprotein 1 OS=Rattus norvegicus GN=Lamp1 PE=1 SV=1	KOG4818	2e-07	Lysosomal-associated membrane protein	ko04140;ko04142;ko04145;ko05152	Autophagy - animal|Lysosome|Phagosome|Tuberculosis	4	K06528	LAMP1_2, CD107	lysosomal-associated membrane protein 1/2	GO:0097208;GO:0044194;GO:0031410;GO:0030425;GO:0010008;GO:0009897;GO:0070062;GO:0016021;GO:0005770;GO:0042470;GO:0005771;GO:0043025;GO:0048471;GO:0061474;GO:0042383;GO:0008021;GO:0005773;GO:0048102;GO:0006914;GO:0072594;GO:0090160;GO:0008626;GO:0043323;GO:0050821;GO:1902513	alveolar lamellar body|cytolytic granule|cytoplasmic vesicle|dendrite|endosome membrane|external side of plasma membrane|extracellular exosome|integral component of membrane|late endosome|melanosome|multivesicular body|neuronal cell body|perinuclear region of cytoplasm|phagolysosome membrane|sarcolemma|synaptic vesicle|vacuole|autophagic cell death|autophagy|establishment of protein localization …
comp104647_c0_seq1	17428.4	34846.9	9.89949	0.000284085	-11.7814	0.013508	0.931045	Down	1578.8	0.244967	994
comp104648_c0_seq1	135.765	0	271.529	Inf	Inf	0.0226713	1	Up	0	17.1079	365
comp104689_c0_seq2	421.082	842.164	0	0	#NAME?	0.00440587	0.523484	Down	41.9875	0	903
comp104720_c0_seq1	141.068	0.707107	281.428	398	8.63662	0.0365696	1	Up	0.0099108	2.08604	3117	gi|510854797|gb|EPB70715.1|Cation transporter family protein [Ancylostoma ceylanicum]	2e-22	sp|P41849|LGC50_CAEEL	7e-14	Ligand-gated ion channel 50 OS=Caenorhabditis elegans GN=lgc-50 PE=3 SV=3	KOG3644	2e-20	Ligand-gated ion channel	ko04080;ko05032;ko05033;ko04723;ko04726;ko04727	Neuroactive ligand-receptor interaction|Morphine addiction|Nicotine addiction|Retrograde endocannabinoid signaling|Serotonergic synapse|GABAergic synapse	6	K05181	GABRB	gamma-aminobutyric acid receptor subunit beta	GO:0030054;GO:0005887;GO:0043005;GO:0045211;GO:0045202;GO:0005254;GO:0005237;GO:1902476;GO:0007214;GO:0050877;GO:0042391;GO:0042493;GO:0007268	cell junction|integral component of plasma membrane|neuron projection|postsynaptic membrane|synapse|chloride channel activity|inhibitory extracellular ligand-gated ion channel activity|chloride transmembrane transport|gamma-aminobutyric acid signaling pathway|neurological system process|regulation of membrane potential|response to drug|synaptic transmission
comp104722_c0_seq6	90.5097	0	181.019	Inf	Inf	0.0408274	1	Up	0	5.76239	725
comp104872_c0_seq1	16256.7	32507.8	5.65685	0.000174015	-12.4885	0.0090151	0.7485	Down	2201.49	0.178312	665
comp104876_c0_seq1	554.725	3.53553	1105.92	312.8	8.2891	0.00804808	0.701238	Up	0.33947	59.1293	431
comp104906_c0_seq1	200.818	401.637	0	0	#NAME?	0.019258	1	Down	19.8456	0	912
comp104919_c0_seq1	650.892	1298.96	2.82843	0.00217746	-8.84314	0.00617405	0.611788	Down	27.7637	0.0289795	2107	gi|1022764381|gb|KZS09820.1|Uncharacterized protein APZ42_025850 [Daphnia magna]	1e-71	sp|Q9FR44|PEAM1_ARATH	2e-67	Phosphoethanolamine N-methyltransferase 1 OS=Arabidopsis thaliana GN=NMT1 PE=1 SV=1	KOG1269	4e-70	SAM-dependent methyltransferases	ko00564	Glycerophospholipid metabolism	1	K05929	E2.1.1.103, NMT	phosphoethanolamine N-methyltransferase	GO:0005737;GO:0005829;GO:0008168;GO:0000234;GO:0042425;GO:0032259;GO:0006656;GO:0009555;GO:0009860;GO:0010183;GO:0048528;GO:0009826	cytoplasm|cytosol|methyltransferase activity|phosphoethanolamine N-methyltransferase activity|choline biosynthetic process|methylation|phosphatidylcholine biosynthetic process|pollen development|pollen tube growth|pollen tube guidance|post-embryonic root development|unidimensional cell growth
comp104964_c0_seq1	620.133	0	1240.27	Inf	Inf	0.00105941	0.334829	Up	0	72.7576	393
comp104965_c0_seq1	558.261	6.36396	1110.16	174.444	7.44662	0.0134021	0.927585	Up	0.487326	44.0359	581
comp105002_c0_seq1	1149.05	2298.1	0	0	#NAME?	0.000850161	0.33299	Down	305.302	0	339
comp105024_c0_seq1	7373.71	1.41421	14746	10427	13.348	0.00101547	0.33299	Up	0.0335311	236.231	1439
comp105119_c0_seq1	208.95	2.12132	415.779	196	7.61471	0.0328295	1	Up	0.158343	15.7895	608
comp105162_c0_seq1	150.967	301.935	0	0	#NAME?	0.0316056	1	Down	2.12095	0	6414	gi|1004403236|gb|EEZ99352.2|toll-6 [Tribolium castaneum]	0	sp|Q9DBB9|CPN2_MOUSE	5e-25	Carboxypeptidase N subunit 2 OS=Mus musculus GN=Cpn2 PE=1 SV=2	KOG4641	0	FOG: Toll/interleukin receptor and related proteins containing LRR and TIR repeats							GO:0072562;GO:0070062	blood microparticle|extracellular exosome
comp105209_c0_seq1	457.498	0	914.996	Inf	Inf	0.00190356	0.378845	Up	0	29.8684	706
comp105209_c1_seq1	651.952	0	1303.9	Inf	Inf	0.000970039	0.33299	Up	0	65.7421	457	gi|594551820|gb|AHM10345.1|tetraspanins-like protein [Penaeus monodon]	9e-35	sp|P08962|CD63_HUMAN	8e-16	CD63 antigen OS=Homo sapiens GN=CD63 PE=1 SV=2	KOG3882	2e-16	Tetraspanin family integral membrane protein	ko04142;ko05205	Lysosome|Proteoglycans in cancer	2	K06497	CD63, MLA1, TSPAN30	CD63 antigen	GO:0009986;GO:0031904;GO:0010008;GO:0070062;GO:0005615;GO:0005887;GO:0031226;GO:0031902;GO:0005765;GO:0042470;GO:0097487;GO:0005886;GO:0031088;GO:0007596;GO:0016477;GO:0007160;GO:0034613;GO:0035646;GO:0048757;GO:0030168;GO:0002576;GO:2001046;GO:0002092;GO:0015031;GO:2000680;GO:1900746	cell surface|endosome lumen|endosome membrane|extracellular exosome|extracellular space|integral component of plasma membrane|intrinsic component of plasma membrane|late endosome membrane|lysosomal membrane|melanosome|multivesicular body, internal vesicle|plasma membrane|platelet dense granule membrane|blood coagulation|cell migration|cell-matrix adhesion|cellular protein localization|endosome to…
comp105224_c0_seq1	95.4594	0	190.919	Inf	Inf	0.0380515	1	Up	0	6.46268	681
comp105298_c0_seq1	119.855	239.709	0	0	#NAME?	0.0442679	1	Down	25.3244	0	426
comp105321_c0_seq1	101.116	0	202.233	Inf	Inf	0.0351626	1	Up	0	13.1714	354
comp105412_c0_seq1	18356.5	5.65685	36707.3	6489	12.6638	0.0104762	0.811172	Up	0.483953	1627.34	520
comp105499_c0_seq1	83.4386	0	166.877	Inf	Inf	0.0452464	1	Up	0	7.11551	541
comp105620_c0_seq1	2958.89	5912.12	5.65685	0.000956823	-10.0295	0.00210806	0.388806	Down	158.761	0.0802528	1677	gi|347665761|gb|AEP17493.1|copper/zinc superoxide dismutase [Eriocheir sinensis]	5e-42	sp|P80566|SODC_CHICK	1e-33	Superoxide dismutase [Cu-Zn] OS=Gallus gallus GN=SOD1 PE=1 SV=3	KOG0441	4e-32	Cu2+/Zn2+ superoxide dismutase SOD1	ko04146;ko05014;ko05016;ko05020;ko04213	Peroxisome|Amyotrophic lateral sclerosis (ALS)|Huntington's disease|Prion diseases|Longevity regulating pathway - multiple species	5	K04565	SOD1	superoxide dismutase, Cu-Zn family	GO:0005737;GO:0005634;GO:0046872;GO:0004784	cytoplasm|nucleus|metal ion binding|superoxide dismutase activity
comp105683_c1_seq1	499.571	999.142	0	0	#NAME?	0.00317267	0.449535	Down	75.7597	0	594
comp105693_c0_seq1	190.212	0	380.423	Inf	Inf	0.0124098	0.890951	Up	0	19.8149	442
comp105695_c0_seq1	4087.43	8150.82	24.0416	0.0029496	-8.40527	0.00722622	0.666395	Down	586.388	0.887963	626	gi|146432667|gb|ABQ41234.1|male reproductive-related protein [Macrobrachium rosenbergii]	4e-47
comp105708_c0_seq1	476.236	0.707107	951.766	1346	10.3945	0.00350227	0.472395	Up	0.0249767	12.9901	1688
comp105799_c0_seq1	6809.44	13597.7	21.2132	0.00156006	-9.32418	0.00735838	0.676115	Down	250.046	0.195101	2449
comp105847_c0_seq1	416.132	832.265	0	0	#NAME?	0.00450953	0.530063	Down	119.031	0	315
comp105885_c0_seq3	546.947	1091.07	2.82843	0.00259235	-8.59152	0.00818693	0.706668	Down	10.6949	0.0155648	4595	gi|646713263|gb|KDR17682.1|Cytoplasmic dynein 2 light intermediate chain 1 [Zootermopsis nevadensis]	5e-95	sp|Q32KV4|DC2L1_BOVIN	1e-76	Cytoplasmic dynein 2 light intermediate chain 1 OS=Bos taurus GN=DYNC2LI1 PE=2 SV=1	KOG3929	1e-76	Uncharacterized conserved protein	ko04962	Vasopressin-regulated water reabsorption	1	K10417	DYNC2LI	dynein light intermediate chain 2, cytosolic	GO:0045177;GO:0005930;GO:0036064;GO:0030286;GO:0030990;GO:0005874;GO:0031512;GO:0072372;GO:0045504;GO:0003774;GO:0042384;GO:0007368	apical part of cell|axoneme|ciliary basal body|dynein complex|intraciliary transport particle|microtubule|motile primary cilium|primary cilium|dynein heavy chain binding|motor activity|cilium assembly|determination of left/right symmetry
comp105931_c0_seq6	203.647	0	407.294	Inf	Inf	0.0107972	0.82481	Up	0	15.2137	618
comp105989_c0_seq1	172.534	0	345.068	Inf	Inf	0.0150084	0.991024	Up	0	21.5862	368
comp106024_c0_seq1	2536.75	5073.49	0	0	#NAME?	0.000415995	0.33299	Down	231.502	0	987
comp106037_c0_seq1	323.501	2.12132	644.881	304	8.24793	0.0145118	0.967052	Up	0.13878	20.1525	737
comp106051_c0_seq1	18588.1	13.435	37162.7	2766.11	11.4336	0.0169478	1	Up	0.344485	492.349	1740	gi|443700841|gb|ELT99607.1|hypothetical protein CAPTEDRAFT_167148 [Capitella teleta]	4e-25	sp|Q9W6I9|THA_ONCMY	5e-18	Thyroid hormone receptor alpha (Fragment) OS=Oncorhynchus mykiss GN=thra PE=3 SV=1	KOG3575	5e-16	FOG: Hormone receptors							GO:0005634;GO:0003677;GO:0046872;GO:0003707;GO:0070324;GO:0004887;GO:0030522;GO:0006351	nucleus|DNA binding|metal ion binding|steroid hormone receptor activity|thyroid hormone binding|thyroid hormone receptor activity|intracellular receptor signaling pathway|transcription, DNA-templated
comp106057_c0_seq1	7054.45	14104.7	4.24264	0.000300797	-11.6989	0.00224294	0.399969	Down	725.12	0.0941055	876
comp106253_c0_seq1	6068.74	12134.7	2.82843	0.000233087	-12.0668	0.0014885	0.356031	Down	331.002	0.034021	1651
comp106290_c0_seq2	734.684	0	1469.37	Inf	Inf	0.000790624	0.33299	Up	0	105.147	322
comp106316_c0_seq1	7195.87	37.4767	14354.3	383.019	8.58127	0.0120265	0.872997	Up	0.818141	161.018	2055
comp106335_c0_seq1	113.137	0	226.274	Inf	Inf	0.0299282	1	Up	0	5.82966	897
comp106474_c0_seq1	14177.8	28350	5.65685	0.000199536	-12.2911	0.00708321	0.661287	Down	2160.29	0.236731	591
comp106479_c0_seq3	77.7817	0	155.563	Inf	Inf	0.0492292	1	Up	0	3.31512	1082
comp106503_c0_seq2	19084.1	5.65685	38162.6	6746.25	12.7199	0.0112098	0.838841	Up	0.326013	1127.89	780
comp106584_c0_seq1	7485.79	14967.3	4.24264	0.00028346	-11.7846	0.00239769	0.406158	Down	1101.41	0.134647	612
comp106585_c0_seq4	363.453	0	726.906	Inf	Inf	0.00309468	0.445609	Up	0	22.4491	747
comp106636_c0_seq1	105.359	0	210.718	Inf	Inf	0.0331818	1	Up	0	8.47396	574
comp106696_c0_seq3	131.522	0	263.044	Inf	Inf	0.0238329	1	Up	0	10.8206	561
comp106743_c0_seq1	3321.63	61.5183	6581.75	106.989	6.74131	0.0192857	1	Up	4.53233	248.347	611
comp106766_c0_seq1	1227.89	34.6482	2421.13	69.8776	6.12676	0.0251534	1	Up	0.906598	32.3815	1724
comp106773_c0_seq1	6883.68	13761.7	5.65685	0.000411057	-11.2484	0.00266255	0.418739	Down	865.582	0.187312	716
comp106785_c0_seq1	220.264	440.528	0	0	#NAME?	0.0161267	1	Down	21.0665	0	942	gi|954569501|ref|XP_014608880.1|PREDICTED: pro-resilin-like [Polistes canadensis]	6e-12	sp|Q9V7U0|RESIL_DROME	4e-06	Pro-resilin OS=Drosophila melanogaster GN=resilin PE=1 SV=1										GO:0031012;GO:0005576;GO:0032992;GO:0008061;GO:0030023;GO:0008010;GO:0042302;GO:0040003	extracellular matrix|extracellular region|protein-carbohydrate complex|chitin binding|extracellular matrix constituent conferring elasticity|structural constituent of chitin-based larval cuticle|structural constituent of cuticle|chitin-based cuticle development
comp106791_c0_seq1	1292.59	1.41421	2583.77	1827	10.8353	0.00112715	0.34072	Up	0.0684164	71.1715	837
comp106805_c0_seq1	98.9949	0	197.99	Inf	Inf	0.0362117	1	Up	0	5.76633	792
comp106847_c0_seq1	451.134	0	902.268	Inf	Inf	0.0019591	0.378845	Up	0	30.9521	672
comp106869_c1_seq2	77.7817	0	155.563	Inf	Inf	0.0492292	1	Up	0	2.74154	1313
comp106877_c0_seq1	13758.2	27507.9	8.48528	0.000308467	-11.6626	0.00846356	0.720867	Down	288.905	0.0431596	4288	gi|146432661|gb|ABQ41231.1|male reproductive-related protein [Macrobrachium rosenbergii]	1e-39	sp|Q9BXM0|PRAX_HUMAN	9e-08	Periaxin OS=Homo sapiens GN=PRX PE=1 SV=2
comp106889_c0_seq1	4367.09	0	8734.18	Inf	Inf	0.000209853	0.33299	Up	0	538.368	374
comp107036_c0_seq1	655.488	0	1310.98	Inf	Inf	0.000960925	0.33299	Up	0	71.0938	425
comp107043_c0_seq1	106.773	0	213.546	Inf	Inf	0.032555	1	Up	0	3.69172	1334
comp107073_c0_seq1	135.411	270.822	0	0	#NAME?	0.0372331	1	Down	8.54396	0	1426	gi|662204931|ref|XP_008475859.1|PREDICTED: proteoglycan 4-like [Diaphorina citri]	3e-14	sp|Q9BXM0|PRAX_HUMAN	6e-15	Periaxin OS=Homo sapiens GN=PRX PE=1 SV=2
comp107078_c0_seq1	96.1665	0	192.333	Inf	Inf	0.0376743	1	Up	0	11.8142	376
comp107085_c0_seq1	2327.8	1.41421	4654.18	3291	11.6843	0.000663531	0.33299	Up	0.0662548	105.496	1017
comp107224_c0_seq3	120.915	0	241.831	Inf	Inf	0.0271101	1	Up	0	5.62435	994
comp107228_c0_seq4	1567.66	0	3135.31	Inf	Inf	0.000281989	0.33299	Up	0	104.304	693
comp107232_c0_seq1	84.8528	0	169.706	Inf	Inf	0.044316	1	Up	0	6.79194	576
comp107267_c0_seq1	352.139	0	704.278	Inf	Inf	0.00331466	0.462734	Up	0	25.8913	627
comp107280_c0_seq1	128.693	0	257.387	Inf	Inf	0.0246515	1	Up	0	8.38977	709
comp107310_c1_seq1	3321.28	38.1838	6604.38	172.963	7.43432	0.0118942	0.869454	Up	0.975434	86.2064	1766	gi|919089570|ref|XP_013381808.1|PREDICTED: uncharacterized protein LOC106152671 [Lingula anatina]	5e-21
comp107429_c0_seq1	6701.25	13396.8	5.65685	0.000422253	-11.2096	0.00259421	0.411405	Down	1358.83	0.323416	444
comp107448_c0_seq1	311.834	0	623.668	Inf	Inf	0.00432595	0.517143	Up	0	39.2899	366
comp107452_c0_seq1	77.7817	0	155.563	Inf	Inf	0.0492292	1	Up	0	6.3583	562
comp107495_c0_seq1	729.734	22.6274	1436.84	63.5	5.98868	0.0311147	1	Up	1.19301	38.4606	861
comp107555_c0_seq2	1849.44	3694.63	4.24264	0.00114833	-9.76625	0.00223677	0.399897	Down	84.25	0.0530395	1975
comp107584_c0_seq1	328.451	6.36396	650.538	102.222	6.67557	0.0327736	1	Up	0.565027	31.1115	482
comp107591_c0_seq1	238.295	2.82843	473.762	167.5	7.38802	0.0312701	1	Up	0.396594	31.9306	342
comp107660_c0_seq1	3905	7802.92	7.07107	0.000906208	-10.1079	0.00241083	0.406158	Down	445.378	0.226183	789
comp107672_c0_seq4	1714.38	3424.52	4.24264	0.0012389	-9.65672	0.00239731	0.406158	Down	316.687	0.210497	487
comp107696_c0_seq1	199.404	397.394	1.41421	0.00355872	-8.13443	0.0349864	1	Down	13.1493	0.0224027	1361	gi|743692758|gb|AJC52502.1|estrogen sulfotransferase [Scylla olivacea]	3e-56	sp|O75897|ST1C4_HUMAN	1e-32	Sulfotransferase 1C4 OS=Homo sapiens GN=SULT1C4 PE=1 SV=2	KOG1584	3e-33	Sulfotransferase
comp107709_c0_seq2	325.623	651.245	0	0	#NAME?	0.00738309	0.677564	Down	91.3497	0	321	gi|926629188|ref|XP_013780231.1|PREDICTED: BCL-6 corepressor-like protein 1 [Limulus polyphemus]	2e-09
comp107710_c0_seq1	106.773	0	213.546	Inf	Inf	0.032555	1	Up	0	7.67844	643
comp107717_c0_seq2	1697.41	21.9203	3372.9	153.871	7.26558	0.0109328	0.827092	Up	1.3175	103.138	754
comp107739_c0_seq1	2413	6.36396	4819.64	757.333	9.56478	0.00234072	0.406158	Up	0.316707	122.763	905
comp107756_c0_seq1	236.881	0	473.762	Inf	Inf	0.0078534	0.690625	Up	0	33.7296	324
comp107768_c0_seq1	866.206	1709.78	22.6274	0.0132341	-6.2396	0.0253955	1	Down	46.0242	0.309	1673	gi|957760907|gb|ALQ28570.1|neuroparsin 1 [Scylla paramamosain]	4e-15
comp107790_c0_seq1	16809.7	6.36396	33613	5281.78	12.3668	0.0095903	0.769783	Up	0.0812371	217.657	3560	gi|815804145|ref|XP_012222781.1|PREDICTED: peroxidase [Linepithema humile]	3e-111	sp|Q9VEG6|PERC_DROME	7e-88	Prostaglandin = Drosophila melanogaster GN=Pxt PE=2 SV=3	KOG2408	3e-106	Peroxidase/oxygenase							GO:0005615;GO:0005875;GO:0020037;GO:0046872;GO:0004601;GO:0004666;GO:0007304;GO:0007306;GO:0042744;GO:0042743;GO:0030707;GO:0001516;GO:0006979	extracellular space|microtubule associated complex|heme binding|metal ion binding|peroxidase activity|prostaglandin-endoperoxide synthase activity|chorion-containing eggshell formation|eggshell chorion assembly|hydrogen peroxide catabolic process|hydrogen peroxide metabolic process|ovarian follicle cell development|prostaglandin biosynthetic process|response to oxidative stress
comp107833_c0_seq1	149.2	0	298.399	Inf	Inf	0.0194367	1	Up	0	19.2039	358
comp107874_c0_seq1	232.638	1.41421	463.862	328	8.35755	0.0211645	1	Up	0.076853	11.4836	930	gi|961073127|ref|XP_014784835.1|PREDICTED: uncharacterized protein LOC106879674 [Octopus bimaculoides]	3e-46
comp107949_c0_seq1	782.06	0	1564.12	Inf	Inf	0.000712931	0.33299	Up	0	67.4022	535
comp108163_c0_seq1	391.03	782.06	0	0	#NAME?	0.0051012	0.554323	Down	21.8982	0	1608
comp108211_c0_seq1	933.735	4.94975	1862.52	376.286	8.55568	0.00492688	0.547995	Up	0.195201	39.1419	1097
comp108300_c0_seq1	5492.81	4.24264	10981.4	2588.33	11.3378	0.0016	0.365346	Up	0.213632	297.126	852
comp108380_c0_seq2	241.831	0	483.661	Inf	Inf	0.00751633	0.683549	Up	0	4.03704	2758	gi|926639221|ref|XP_013785663.1|PREDICTED: uncharacterized protein LOC106469698 [Limulus polyphemus]	1e-77	sp|Q14973|NTCP_HUMAN	1e-26	Sodium/bile acid cotransporter OS=Homo sapiens GN=SLC10A1 PE=2 SV=1	KOG2718	4e-38	Na+-bile acid cotransporter							GO:0016323;GO:0005887;GO:0005886;GO:0008508;GO:0015721;GO:0008206;GO:0044281;GO:0006810	basolateral plasma membrane|integral component of plasma membrane|plasma membrane|bile acid:sodium symporter activity|bile acid and bile salt transport|bile acid metabolic process|small molecule metabolic process|transport
comp108405_c0_seq3	159.806	0	319.612	Inf	Inf	0.0172663	1	Up	0	12.8386	573
comp108468_c0_seq2	1129.25	38.1838	2220.32	58.1481	5.86166	0.030743	1	Up	1.0132	30.4255	1682	gi|51102831|gb|AAT96010.1|transposase [Drosophila willistoni]	9e-56	sp|Q7M3K2|PELET_DROME	4e-55	Transposable element P transposase OS=Drosophila melanogaster GN=T PE=1 SV=2										GO:0046872;GO:0003693;GO:0016740;GO:0004803;GO:0015074;GO:0006313	metal ion binding|P-element binding|transferase activity|transposase activity|DNA integration|transposition, DNA-mediated
comp108502_c0_seq1	15965.4	31923.7	7.07107	0.000221499	-12.1404	0.00980002	0.777885	Down	1007.48	0.119946	1427
comp108508_c0_seq1	16949	33879.6	18.3848	0.00054265	-10.8477	0.0181411	1	Down	1142.88	0.318749	1335
comp108543_c0_seq3	101.116	0	202.233	Inf	Inf	0.0351626	1	Up	0	9.69831	480
comp108551_c0_seq1	83.4386	0	166.877	Inf	Inf	0.0452464	1	Up	0	4.48904	854	gi|196123668|gb|ACG70181.1|cathepsin D-like protein [Homarus americanus]	4e-88	sp|Q03168|ASPP_AEDAE	1e-69	Lysosomal aspartic protease OS=Aedes aegypti GN=AAEL006169 PE=1 SV=2	KOG1339	2e-67	Aspartyl protease	ko04210;ko04140;ko04142;ko04071;ko05152	Apoptosis|Autophagy - animal|Lysosome|Sphingolipid signaling pathway|Tuberculosis	5	K01379	CTSD	cathepsin D	GO:0005764;GO:0004190	lysosome|aspartic-type endopeptidase activity
comp108569_c0_seq2	353.553	0	707.107	Inf	Inf	0.00328588	0.461264	Up	0	9.3412	1744
comp108714_c0_seq1	112.43	0	224.86	Inf	Inf	0.030205	1	Up	0	7.02949	737
comp108762_c0_seq2	452.548	0	905.097	Inf	Inf	0.00194653	0.378845	Up	0	27.5077	758
comp108780_c0_seq1	85.5599	0	171.12	Inf	Inf	0.04386	1	Up	0	12.7198	310
comp108904_c0_seq1	11840.9	23667.6	14.1421	0.000597532	-10.7087	0.00949664	0.767701	Down	737.62	0.232475	1445
comp108970_c0_seq2	17777.7	35548.4	7.07107	0.000198914	-12.2956	0.0117354	0.86034	Down	1602.5	0.156325	999	gi|572269612|ref|XP_006612821.1|PREDICTED: sporulation-specific protein 15-like [Apis dorsata]	7e-09
comp109046_c0_seq1	213.9	424.971	2.82843	0.00665557	-7.23122	0.0434171	1	Down	25.2492	0.0863916	758
comp109058_c0_seq1	89.0955	0	178.191	Inf	Inf	0.0416663	1	Up	0	3.4592	1191
comp109070_c0_seq1	335.522	7.77817	663.266	85.2727	6.41401	0.0373714	1	Up	0.15534	6.93708	2206	gi|260835488|ref|XP_002612740.1|hypothetical protein BRAFLDRAFT_97280 [Branchiostoma floridae]	1e-08
comp109070_c1_seq1	10921.6	164.756	21678.5	131.579	7.03979	0.0488598	1	Up	3.90472	263.308	1898	gi|734567993|gb|AJA06113.1|cytochrome P450 CYP302a1 [Portunus trituberculatus]	4e-156	sp|Q9NGX9|CP302_DROME	5e-110	Cytochrome P450 302a1, mitochondrial OS=Drosophila melanogaster GN=dib PE=2 SV=2	KOG0159	6e-98	Cytochrome P450 CYP11/CYP12/CYP24/CYP27 subfamilies	ko00981	Insect hormone biosynthesis	1	K10721	DIB	CYP302A1	GO:0031966;GO:0005739;GO:0042767;GO:0009055;GO:0020037;GO:0005506;GO:0016705;GO:0007417;GO:0008362;GO:0007391;GO:0006697;GO:0008258;GO:0007494	mitochondrial membrane|mitochondrion|ecdysteroid 22-hydroxylase activity|electron carrier activity|heme binding|iron ion binding|oxidoreductase activity, acting on paired donors, with incorporation or reduction of molecular oxygen|central nervous system development|chitin-based embryonic cuticle biosynthetic process|dorsal closure|ecdysone biosynthetic process|head involution|midgut development
comp109085_c0_seq1	111.016	222.032	1.35679	0.00432566	-7.21796	0.0491365	1	Down	39.3099	0.00345316	1074	gi|337733630|gb|AEI72264.1|crustacean female sex hormonoe, partial [Carcinus maenas]	7e-10
comp109149_c0_seq1	100.409	0	200.818	Inf	Inf	0.0355078	1	Up	0	12.1505	380
comp109189_c0_seq1	142.128	284.257	0	0	#NAME?	0.0346598	1	Down	35.6016	0	360
comp109189_c1_seq1	296.985	593.97	0	0	#NAME?	0.00890566	0.743416	Down	56.7651	0	471
comp109190_c2_seq3	2789.54	0	5579.07	Inf	Inf	0.000195215	0.33299	Up	0	287.091	448
comp109192_c0_seq1	17620	9.19239	35230.9	3832.62	11.9041	0.0126837	0.902935	Up	0.634029	1265.06	642
comp109211_c0_seq1	7947.17	15892.9	1.41421	8.89838e-05	-13.4561	0.00142605	0.346476	Down	473.371	0.0255909	1512
comp109214_c0_seq2	1239.91	53.033	2426.79	45.76	5.51602	0.0390578	1	Up	2.31594	54.532	1026	gi|238476875|gb|ACR43431.1|crustin type I [Macrobrachium rosenbergii]	3e-75
comp109225_c0_seq1	299.106	4.24264	593.97	140	7.12928	0.0279432	1	Up	0.186546	12.597	1087
comp109246_c0_seq1	263.751	0	527.502	Inf	Inf	0.00623981	0.615889	Up	0	20.218	602
comp109246_c1_seq1	537.755	2.12132	1073.39	506	8.98299	0.0056215	0.582944	Up	0.119438	31.1367	795
comp109257_c1_seq1	254.912	509.824	0	0	#NAME?	0.0121122	0.875267	Down	62.7384	0	366
comp109312_c0_seq1	1967.52	3921.61	13.435	0.000894737	-8.1893	0.0057328	0.590447	Down	98.7913	0.648835	915	gi|597502293|sp|G4V4G0.1|SIBD2_CUPSARecName: Full=Single insulin-like growth factor-binding domain protein-2; Short=SIBD-2; Flags: Precursor	8e-07	sp|G4V4G0|SIBD2_CUPSA	2e-06	Single insulin-like growth factor-binding domain protein-2 OS=Cupiennius salei PE=1 SV=1										GO:0005576;GO:0045087;GO:0001558	extracellular region|innate immune response|regulation of cell growth
comp109329_c0_seq1	17543.7	2.12132	35085.2	16539.3	14.0136	0.00593764	0.604969	Up	0.034218	330.799	2445	gi|443693726|gb|ELT95020.1|hypothetical protein CAPTEDRAFT_183922 [Capitella teleta]	3e-44	sp|Q8BTK5|SMYD4_MOUSE	7e-32	SET and MYND domain-containing protein 4 OS=Mus musculus GN=Smyd4 PE=2 SV=2	KOG2084	1e-33	Predicted histone tail methylase containing SET domain							GO:0046872;GO:0008168	metal ion binding|methyltransferase activity
comp109434_c0_seq1	322.441	0	644.881	Inf	Inf	0.00401945	0.505155	Up	0	19.2748	771
comp109463_c0_seq1	4111.47	31.8198	8191.12	257.422	8.00799	0.00927121	0.758139	Up	2.03013	266.335	709
comp109506_c0_seq1	7190.22	33.234	14347.2	431.702	8.75389	0.0108613	0.82481	Up	1.30368	288.611	1146
comp109543_c0_seq1	509.824	1.41421	1018.23	720	9.49185	0.004625	0.53772	Up	0.139255	50.0683	469
comp109549_c0_seq1	199.404	0	398.808	Inf	Inf	0.0112759	0.841464	Up	0	25.9033	355
comp109688_c0_seq1	4395.38	1.41421	8789.34	6215	12.6015	0.000624031	0.33299	Up	0.0363257	144.429	1403
comp109729_c0_seq1	79.196	0	158.392	Inf	Inf	0.0481921	1	Up	0	3.4971	1040
comp109740_c0_seq2	1050.76	0	2101.52	Inf	Inf	0.000456239	0.33299	Up	0	83.6775	579
comp109755_c0_seq11	235.467	469.519	1.41421	0.00301205	-8.37504	0.0259783	1	Down	11.2454	0.022196	1880
comp109844_c0_seq2	79.196	0	158.392	Inf	Inf	0.0481921	1	Up	0	8.90492	409
comp109928_c0_seq2	1163.19	0	2326.38	Inf	Inf	0.000398025	0.33299	Up	0	88.1842	608
comp110021_c0_seq1	1597	38.8909	3155.11	81.1273	6.34212	0.0213185	1	Up	2.28744	95.0947	765	gi|242006654|ref|XP_002424163.1|Vesicle-associated membrane protein, putative [Pediculus humanus corporis]	3e-17	sp|Q60WU2|SYB1_CAEBR	1e-20	Synaptobrevin-1 OS=Caenorhabditis briggsae GN=snb-1 PE=3 SV=1	KOG0860	5e-21	Synaptobrevin/VAMP-like protein	ko04130;ko04970;ko04911;ko04962;ko04721	SNARE interactions in vesicular transport|Salivary secretion|Insulin secretion|Vasopressin-regulated water reabsorption|Synaptic vesicle cycle	5	K13504	VAMP2	vesicle-associated membrane protein 2	GO:0030054;GO:0016021;GO:0043005;GO:0005886;GO:0030672;GO:0016192	cell junction|integral component of membrane|neuron projection|plasma membrane|synaptic vesicle membrane|vesicle-mediated transport
comp110024_c0_seq1	178.191	356.382	0	0	#NAME?	0.0239829	1	Down	11.4363	0	1404
comp110081_c0_seq3	89.0955	0	178.191	Inf	Inf	0.0416663	1	Up	0	7.49289	549
comp110100_c0_seq3	86.9741	0	173.948	Inf	Inf	0.0429655	1	Up	0	9.10814	441
comp110118_c0_seq1	9772.22	0	19544.4	Inf	Inf	0.000665283	0.33299	Up	0	1496.9	301
comp110133_c0_seq1	138.239	0.707107	275.772	390	8.60733	0.0376983	1	Up	0.0349104	5.18674	1224
comp110185_c0_seq2	121.622	0	243.245	Inf	Inf	0.0268729	1	Up	0	7.3842	758
comp110231_c0_seq1	9630.79	19250.3	11.3137	0.000587717	-10.7326	0.00641035	0.625393	Down	725.476	0.209187	1195	gi|118395911|ref|XP_001030300.1|Serine/Threonine kinase domain protein [Tetrahymena thermophila SB210]	9e-12	sp|Q10056|SHK2_SCHPO	9e-12	Serine/threonine-protein kinase shk2 OS=Schizosaccharomyces pombe (strain 972 / ATCC 24843) GN=shk2 PE=3 SV=1	KOG0578	2e-12	p21-activated serine/threonine protein kinase	ko04010	MAPK signaling pathway	1	K04423	MAP3K12, MUK	mitogen-activated protein kinase kinase kinase 12	GO:0005737;GO:0005739;GO:0005524;GO:0004674;GO:0048365;GO:0030036;GO:0032147;GO:0016477;GO:0000165;GO:0042981;GO:0043408;GO:0007346;GO:0007266;GO:0023014;GO:0031098	cytoplasm|mitochondrion|ATP binding|protein serine/threonine kinase activity|Rac GTPase binding|actin cytoskeleton organization|activation of protein kinase activity|cell migration|MAPK cascade|regulation of apoptotic process|regulation of MAPK cascade|regulation of mitotic cell cycle|Rho protein signal transduction|signal transduction by protein phosphorylation|stress-activated protein kinase si…
comp110276_c0_seq1	3559.22	2.12132	7116.32	3354.67	11.712	0.00079653	0.33299	Up	0.27894	488.212	336
comp110290_c0_seq1	1546.09	12.0208	3080.16	256.235	8.00133	0.00643667	0.627119	Up	1.24458	159.575	445
comp110296_c0_seq1	469.872	0.707107	939.038	1328	10.375	0.00359459	0.479993	Up	0.0814752	43.5835	497
comp110309_c0_seq2	298.046	596.091	0	0	#NAME?	0.00884134	0.742202	Down	14.7641	0	1819	gi|952536988|gb|KRT83977.1|hypothetical protein AMK59_2236, partial [Oryctes borbonicus]	2e-11
comp110311_c0_seq4	1687.16	1.41421	3372.9	2385	11.2198	0.000848185	0.33299	Up	0.187934	228.683	340
comp110378_c0_seq1	22543.6	7.77817	45079.5	5795.64	12.5008	0.0177729	1	Up	0.142596	408.175	2546	gi|939668019|ref|XP_014281064.1|PREDICTED: serine proteinase stubble isoform X2 [Halyomorpha halys]	1e-20	sp|P33587|PROC_MOUSE	4e-12	Vitamin K-dependent protein C OS=Mus musculus GN=Proc PE=1 SV=2	KOG3627	2e-21	Trypsin							GO:0005615;GO:0005509;GO:0008233;GO:0004252;GO:0007596;GO:0043066;GO:0030195	extracellular space|calcium ion binding|peptidase activity|serine-type endopeptidase activity|blood coagulation|negative regulation of apoptotic process|negative regulation of blood coagulation
comp110421_c0_seq1	4985.81	28.2843	9943.34	351.55	8.45759	0.00822627	0.706668	Up	2.05584	371.509	617
comp110435_c0_seq1	1128.54	0	2257.08	Inf	Inf	0.000414125	0.33299	Up	0	66.6317	781
comp110440_c0_seq1	806.809	0	1613.62	Inf	Inf	0.000677817	0.33299	Up	0	56.0214	664
comp110487_c0_seq1	162.281	324.562	0	0	#NAME?	0.0281485	1	Down	11.9454	0	1223	gi|558633449|gb|AHA83583.1|C-type lectin 2 [Marsupenaeus japonicus]	4e-29
comp110502_c0_seq1	80.6102	0	161.22	Inf	Inf	0.0471834	1	Up	0	5.84733	635
comp110534_c0_seq1	356.028	4.94975	707.107	142.857	7.15843	0.0231466	1	Up	0.157599	11.4718	1421
comp110568_c0_seq1	889.54	12.7279	1766.35	138.778	7.11663	0.0132734	0.921595	Up	0.377594	27.0254	1507
comp110599_c0_seq1	86.9741	0	173.948	Inf	Inf	0.0429655	1	Up	0	10.1087	397
comp110601_c1_seq1	132.229	0	264.458	Inf	Inf	0.0236339	1	Up	0	15.8767	384
comp110628_c0_seq1	342.593	10.6066	674.58	63.6	5.99095	0.0470699	1	Up	0.696629	21.994	707
comp110632_c0_seq2	10986.3	5.65685	21967	3883.25	11.923	0.00452478	0.530955	Up	0.117466	238.19	2126
comp110696_c0_seq1	2252.49	12.0208	4492.96	373.765	8.54599	0.00459536	0.535095	Up	0.446496	86.3728	1199	gi|409892959|gb|AFV46145.1|glycosyl-phosphatidylinositol-linked carbonic anhydrase [Portunus trituberculatus]	9e-49	sp|Q8UWA5|CAH2_TRIHK	2e-41	Carbonic anhydrase 2 OS=Tribolodon hakonensis GN=ca2 PE=2 SV=3	KOG0382	1e-36	Carbonic anhydrase	ko00910	Nitrogen metabolism	1	K01672	CA	carbonic anhydrase	GO:0005737;GO:0005886;GO:0004089;GO:0008270;GO:0006730	cytoplasm|plasma membrane|carbonate dehydratase activity|zinc ion binding|one-carbon metabolic process
comp110726_c0_seq1	3848.43	3.53553	7693.32	2176	11.0875	0.00120629	0.34072	Up	0.210593	217.36	816
comp110739_c0_seq1	4467.85	0.707107	8935	12636	13.6253	0.000421609	0.33299	Up	0.0478816	275.014	749
comp110746_c0_seq2	177.13	352.846	1.41421	0.00400802	-7.9629	0.0427453	1	Down	9.06103	0.0269398	1753	gi|954190257|gb|KRX03048.1|hypothetical protein PPERSA_08123 [Pseudocohnilembus persalinus]	7e-06
comp110766_c0_seq1	438.76	2.12132	875.398	412.667	8.68883	0.0081265	0.704024	Up	0.166198	41.618	485
comp110803_c0_seq4	166.17	0	332.34	Inf	Inf	0.0160941	1	Up	0	13.8498	553
comp110835_c0_seq1	434.871	0	869.741	Inf	Inf	0.00211368	0.388896	Up	0	37.5265	534
comp110867_c0_seq1	112.784	225.567	0	0	#NAME?	0.0481019	1	Down	12.7121	0	798
comp110903_c0_seq1	2041.77	0.707107	4082.83	5774	12.4954	0.000468947	0.33299	Up	0.065152	134.443	700
comp110935_c0_seq5	3754.03	41.0122	7467.05	182.069	7.50834	0.0121819	0.878627	Up	0.930418	86.1937	1997	gi|125487484|gb|ABN42642.1|elongation of very long chain fatty acids-like protein [Marsupenaeus japonicus]	6e-101	sp|Q1HRV8|ELVL1_AEDAE	2e-83	Elongation of very long chain fatty acids protein AAEL008004 OS=Aedes aegypti GN=AAEL008004 PE=2 SV=2	KOG3071	3e-67	Fatty acyl-CoA elongase/Polyunsaturated fatty acid specific elongation enzyme	ko00062	Fatty acid elongation	1	K10250	ELOVL7	elongation of very long chain fatty acids protein 7	GO:0030176;GO:0016740;GO:0006633	integral component of endoplasmic reticulum membrane|transferase activity|fatty acid biosynthetic process
comp110948_c0_seq1	976.514	0	1953.03	Inf	Inf	0.000506221	0.33299	Up	0	120.998	372
comp110952_c0_seq1	164.402	328.805	0	0	#NAME?	0.0275488	1	Down	17.9424	0	826
comp110963_c0_seq1	4259.96	3.53553	8516.39	2408.8	11.2341	0.00122591	0.34072	Up	0.261856	316.634	620
comp111033_c0_seq1	989.949	22.6274	1957.27	86.5	6.43463	0.0208559	1	Up	0.497062	21.8817	2062	gi|998493645|ref|XP_015515770.1|PREDICTED: muscle segmentation homeobox-like [Neodiprion lecontei]	1e-32	sp|P15857|HM17_APIME	6e-37	Homeobox protein H17 (Fragment) OS=Apis mellifera PE=3 SV=1	KOG0492	6e-37	Transcription factor MSH, contains HOX domain	ko05166	HTLV-I infection	1	K09341	MSX	homeobox protein MSX	GO:0005634;GO:0043565;GO:0007275;GO:0006355	nucleus|sequence-specific DNA binding|multicellular organismal development|regulation of transcription, DNA-templated
comp111042_c0_seq4	1847.32	2.12132	3692.51	1740.67	10.7654	0.00106542	0.334829	Up	0.102609	82.7196	1029
comp111043_c0_seq1	8376.74	2.12132	16751.4	7896.67	12.947	0.00157102	0.364188	Up	0.070527	304.299	1269
comp111059_c0_seq1	378.656	757.311	0	0	#NAME?	0.00543981	0.574074	Down	79.5118	0	429
comp111061_c0_seq1	95.4594	0	190.919	Inf	Inf	0.0380515	1	Up	0	9.32656	473
comp111093_c0_seq1	84.8528	0	169.706	Inf	Inf	0.044316	1	Up	0	8.07666	484
comp111136_c0_seq1	393.151	0	786.303	Inf	Inf	0.00261403	0.412787	Up	0	32.8336	552
comp111181_c0_seq2	772.868	0	1545.74	Inf	Inf	0.000726877	0.33299	Up	0	52.0858	684
comp111194_c0_seq1	4708.27	9413.71	2.82843	0.000300458	-11.7005	0.0012582	0.34072	Down	552.718	0.102323	767
comp111197_c0_seq5	133.29	266.579	0	0	#NAME?	0.0380975	1	Down	10.755	0	1117
comp111207_c0_seq1	495.328	16.2635	974.393	59.913	5.9048	0.039003	1	Up	1.26365	39.3555	571
comp111212_c0_seq1	3457.4	6913.38	1.41421	0.000204562	-12.2552	0.000792911	0.33299	Down	609.286	0.0847883	511
comp111236_c0_seq2	2203.34	1.41421	4405.28	3115	11.605	0.000685869	0.33299	Up	0.037476	64.8391	1566
comp111281_c0_seq6	136.472	0	272.943	Inf	Inf	0.0224849	1	Up	0	9.68336	651
comp111304_c0_seq1	648.417	1285.52	11.3137	0.00880088	-6.82814	0.0194103	1	Down	40.914	0.186664	1415
comp111306_c0_seq1	96.8736	0	193.747	Inf	Inf	0.0373017	1	Up	0	7.82791	570
comp111342_c0_seq1	197.283	0	394.566	Inf	Inf	0.0115256	0.850635	Up	0	16.1841	563
comp111343_c0_seq1	25961.4	51907.3	15.5563	0.000299695	-11.7042	0.0334195	1	Down	1518.92	0.2317	1539	gi|123421283|ref|XP_001305955.1|viral A-type inclusion protein [Trichomonas vaginalis G3]	7e-10
comp111355_c0_seq1	194.454	388.909	0	0	#NAME?	0.0204582	1	Down	23.594	0	742
comp111364_c0_seq1	202.94	0	405.879	Inf	Inf	0.0108752	0.82481	Up	0	10.3646	904	gi|918287616|gb|KOF67384.1|hypothetical protein OCBIM_22009709mg [Octopus bimaculoides]	3e-06
comp111396_c0_seq1	224.86	0	449.72	Inf	Inf	0.00877079	0.739556	Up	0	21.9324	472
comp111400_c0_seq1	85.5599	0	171.12	Inf	Inf	0.04386	1	Up	0	2.5995	1515	gi|341882233|gb|EGT38168.1|CBN-LAT-2 protein [Caenorhabditis brenneri]	1e-50	sp|G5ECX0|LPLT2_CAEEL	4e-46	Latrophilin-like protein LAT-2 OS=Caenorhabditis elegans GN=lat-2 PE=2 SV=1	KOG4193	9e-47	G protein-coupled receptors							GO:0016021;GO:0005886;GO:0030246;GO:0004175;GO:0004930;GO:0007166;GO:0097264	integral component of membrane|plasma membrane|carbohydrate binding|endopeptidase activity|G-protein coupled receptor activity|cell surface receptor signaling pathway|self proteolysis
comp111423_c0_seq1	293.096	583.363	2.82843	0.00484848	-7.68825	0.0249708	1	Down	25.7405	0.0778474	1021
comp111438_c0_seq1	140.714	0	281.428	Inf	Inf	0.0214069	1	Up	0	16.6602	389
comp111459_c0_seq2	17073.8	8.48528	34139.1	4023.33	11.9742	0.0115357	0.850635	Up	0.372306	748.824	1051
comp111462_c0_seq2	2485.83	45.9619	4925.71	107.169	6.74375	0.0171127	1	Up	1.13447	62.6286	1813
comp111485_c0_seq1	127.986	0	255.973	Inf	Inf	0.024862	1	Up	0	2.80054	2111	gi|478733532|gb|AGJ51191.1|olfactory ionotropic receptor IR4 [Panulirus argus]	7e-118	sp|P26591|GLRK_LYMST	2e-17	Glutamate receptor OS=Lymnaea stagnalis PE=2 SV=1	KOG1052	1e-16	Glutamate-gated kainate-type ion channel receptor subunit GluR5 and related subunits							GO:0030054;GO:0016021;GO:0045211;GO:0005234;GO:0004970	cell junction|integral component of membrane|postsynaptic membrane|extracellular-glutamate-gated ion channel activity|ionotropic glutamate receptor activity
comp111488_c1_seq1	216.021	432.042	0	0	#NAME?	0.0167466	1	Down	24.8593	0	783
comp111496_c0_seq1	318.905	632.153	5.65685	0.00894855	-6.80413	0.0342373	1	Down	11.4793	0.0531953	2481
comp111519_c0_seq4	99.7021	0	199.404	Inf	Inf	0.0358575	1	Up	0	3.9365	1167
comp111558_c0_seq1	241.123	0	482.247	Inf	Inf	0.00756316	0.68415	Up	0	27.6387	402
comp111575_c0_seq1	318.905	2.82843	634.982	224.5	7.81057	0.0183069	1	Up	0.165692	19.2231	762
comp111585_c0_seq1	6000.15	11996.1	4.24264	0.000353669	-11.4653	0.00192142	0.378845	Down	302.99	0.0639837	1783	gi|645021959|ref|XP_008206905.1|PREDICTED: probable serine/threonine-protein kinase DDB_G0281745 [Nasonia vitripennis]	3e-09	sp|Q96S53|TESK2_HUMAN	5e-11	Dual specificity testis-specific protein kinase 2 OS=Homo sapiens GN=TESK2 PE=1 SV=1										GO:0005737;GO:0005654;GO:0005634;GO:0005524;GO:0046872;GO:0004672;GO:0004674;GO:0004712;GO:0004713;GO:0030036;GO:0048041;GO:0006468;GO:0007283	cytoplasm|nucleoplasm|nucleus|ATP binding|metal ion binding|protein kinase activity|protein serine/threonine kinase activity|protein serine/threonine/tyrosine kinase activity|protein tyrosine kinase activity|actin cytoskeleton organization|focal adhesion assembly|protein phosphorylation|spermatogenesis
comp111617_c0_seq2	7579.83	15130	29.6985	0.00196289	-8.9928	0.0104155	0.808316	Down	603.523	0.601622	1129
comp111694_c0_seq1	96.8736	0	193.747	Inf	Inf	0.0373017	1	Up	0	5.89525	758
comp111699_c0_seq2	832.618	0.707107	1664.53	2354	11.2009	0.00133348	0.342918	Up	0.0741998	61.0964	628
comp111722_c0_seq2	213.9	427.8	0	0	#NAME?	0.0170691	1	Down	40.534	0	475
comp111746_c0_seq1	348.604	0	697.207	Inf	Inf	0.00338834	0.467128	Up	0	32.0008	502
comp111751_c0_seq1	734.684	0	1469.37	Inf	Inf	0.000790624	0.33299	Up	0	13.8325	2448
comp111782_c0_seq1	745.291	7.07107	1483.51	209.8	7.71287	0.00952737	0.767701	Up	0.832757	91.6644	373
comp111789_c0_seq1	118.794	0	237.588	Inf	Inf	0.0278398	1	Up	0	6.19225	887
comp111817_c0_seq1	106.773	0	213.546	Inf	Inf	0.032555	1	Up	0	9.71882	508
comp111845_c0_seq1	955.301	12.7279	1897.87	149.111	7.22024	0.0120767	0.873534	Up	0.263176	20.3146	2153	gi|828211189|ref|XP_012558570.1|PREDICTED: zinc finger protein OZF-like isoform X2 [Hydra vulgaris]	3e-76	sp|O94892|ZN432_HUMAN	8e-68	Zinc finger protein 432 OS=Homo sapiens GN=ZNF432 PE=1 SV=1	KOG1721	2e-68	FOG: Zn-finger							GO:0005634;GO:0003677;GO:0046872;GO:0003700;GO:0006355;GO:0006351	nucleus|DNA binding|metal ion binding|transcription factor activity, sequence-specific DNA binding|regulation of transcription, DNA-templated|transcription, DNA-templated
comp111864_c0_seq1	1295.42	31.1127	2559.73	82.2727	6.36234	0.0211109	1	Up	2.66218	111.575	529
comp111975_c0_seq1	596.091	1185.11	7.07107	0.00596659	-7.38888	0.0144768	0.966023	Down	42.2206	0.132753	1264	gi|524878661|ref|XP_005096013.1|PREDICTED: meiotic recombination protein REC114-like [Aplysia californica]	2e-06
comp111985_c1_seq1	1733.83	1.41421	3466.24	2451	11.2592	0.000826995	0.33299	Up	0.056094	93.2307	857
comp111996_c0_seq2	271.883	2.12132	541.644	255.333	7.99624	0.0202376	1	Up	0.291151	40.3162	310
comp112001_c0_seq4	468.812	18.3848	919.239	50	5.64386	0.047587	1	Up	0.944648	24.657	860
comp112070_c0_seq1	6565.49	1.41421	13129.6	9284	13.1805	0.000870559	0.33299	Up	0.163368	717.217	422
comp112074_c0_seq2	2147.48	0	4294.97	Inf	Inf	0.000217914	0.33299	Up	0	131.82	751
comp112143_c0_seq1	123.037	0	246.073	Inf	Inf	0.0264071	1	Up	0	6.7625	841
comp112148_c0_seq2	358.15	709.228	7.07107	0.00997009	-6.64818	0.0332815	1	Down	18.7926	0.0980304	1700
comp112158_c0_seq2	678.823	0	1357.65	Inf	Inf	0.00090438	0.33299	Up	0	42.7069	733
comp112219_c0_seq3	5773.17	3.53553	11542.8	3264.8	11.6728	0.0014385	0.348044	Up	0.187172	319.443	833
comp112224_c0_seq1	1218.34	60.8112	2375.88	39.0698	5.28798	0.0460725	1	Up	1.46149	29.3002	1869
comp112309_c0_seq1	236.881	473.762	0	0	#NAME?	0.0139925	0.950269	Down	17.1962	0	1240	gi|1022776870|gb|KZS20518.1|Uncharacterized protein APZ42_012775, partial [Daphnia magna]	2e-15
comp112352_c0_seq1	1609.38	3177.74	41.0122	0.0129061	-6.2758	0.0226341	1	Down	219.151	1.47068	653	gi|317412179|sp|P0CJ14.1|VP302_LYCMCRecName: Full=Venom protein 302; Flags: Precursor	7e-12	sp|P0CJ14|VP302_LYCMC	3e-11	Venom protein 302 OS=Lychas mucronatus PE=2 SV=1										GO:0005576;GO:0001558	extracellular region|regulation of cell growth
comp112366_c0_seq3	197.99	0	395.98	Inf	Inf	0.0114416	0.848648	Up	0	4.2663	2136
comp112404_c0_seq2	206.475	0	412.95	Inf	Inf	0.0104928	0.811626	Up	0	12.0774	788
comp112410_c0_seq1	22857.9	11.3137	45704.6	4039.75	11.9801	0.0218383	1	Up	0.529773	1109.06	950
comp112412_c1_seq1	7464.57	14922.1	7.07107	0.000473866	-11.0432	0.00339042	0.467128	Down	626.292	0.160696	1073
comp112433_c0_seq1	87.6812	0	175.362	Inf	Inf	0.0425268	1	Up	0	8.11303	500
comp112435_c0_seq1	479.065	12.0208	946.109	78.7059	6.2984	0.0308524	1	Up	0.770358	31.7735	686
comp112443_c1_seq1	1197.84	1.41421	2394.26	1693	10.7254	0.0012366	0.34072	Up	0.0742009	62.9428	877	gi|641650899|ref|XP_008189920.1|PREDICTED: uncharacterized protein LOC103311885 [Acyrthosiphon pisum]	1e-10
comp112486_c0_seq1	2132.63	2.82843	4262.44	1507	10.5575	0.00121	0.34072	Up	0.281801	213.133	461
comp112491_c0_seq1	111.016	0	222.032	Inf	Inf	0.0307696	1	Up	0	4.37438	1173	gi|308469594|ref|XP_003097034.1|hypothetical protein CRE_21981 [Caenorhabditis remanei]	2e-06
comp112506_c0_seq1	1373.91	2718.12	29.6985	0.0109261	-6.51608	0.0191504	1	Down	22.9387	0.127712	5337	gi|1006592251|gb|AMQ48727.1|delta-9 desaturase [Macrobrachium nipponense]	0	sp|O44390|ACO11_TRINI	1e-105	Acyl-CoA Delta(11) desaturase OS=Trichoplusia ni GN=D11DS PE=1 SV=2	KOG1600	2e-117	Fatty acid desaturase	ko04152;ko01040;ko01212;ko04212;ko03320	AMPK signaling pathway|Biosynthesis of unsaturated fatty acids|Fatty acid metabolism|Longevity regulating pathway - worm|PPAR signaling pathway	5	K00507	SCD, desC	stearoyl-CoA desaturase (Delta-9 desaturase)	GO:0005789;GO:0016021;GO:0017105;GO:0046872;GO:0006633	endoplasmic reticulum membrane|integral component of membrane|acyl-CoA delta11-desaturase activity|metal ion binding|fatty acid biosynthetic process
comp112536_c0_seq1	877.873	14.8492	1740.9	117.238	6.8733	0.0157966	1	Up	1.84989	110.216	364
comp112537_c0_seq1	357.089	8.48528	705.693	83.1667	6.37793	0.0362669	1	Up	0.320468	14.0538	1157
comp112549_c0_seq1	454.316	891.662	16.9706	0.0190325	-5.71539	0.0478877	1	Down	19.9923	0.192889	2008	gi|646711660|gb|KDR16751.1|7-dehydrocholesterol reductase [Zootermopsis nevadensis]	6e-133	sp|Q9LDU6|ST7R_ARATH	4e-88	7-dehydrocholesterol reductase OS=Arabidopsis thaliana GN=DWF5 PE=1 SV=1	KOG1435	9e-89	Sterol reductase/lamin B receptor	ko00100	Steroid biosynthesis	1	K00213	DHCR7	7-dehydrocholesterol reductase	GO:0005789;GO:0005794;GO:0016021;GO:0005886;GO:0047598;GO:0009918;GO:0016132;GO:0006695	endoplasmic reticulum membrane|Golgi apparatus|integral component of membrane|plasma membrane|7-dehydrocholesterol reductase activity|sterol delta7 reductase activity|brassinosteroid biosynthetic process|cholesterol biosynthetic process
comp112552_c0_seq1	134.35	0	268.701	Inf	Inf	0.0230501	1	Up	0	13.4642	459
comp112574_c1_seq1	5446.49	12.0208	10881	905.176	9.82206	0.00386336	0.497212	Up	0.728447	336.68	745
comp112639_c0_seq1	164.756	0	329.512	Inf	Inf	0.0163469	1	Up	0	5.92297	1282
comp112662_c0_seq1	2674.28	8.48528	5340.07	629.333	9.29768	0.00292041	0.432821	Up	0.147061	45.5247	2704	gi|675367337|gb|KFM60239.1|Endothelial transcription factor GATA-2, partial [Stegodyphus mimosarum]	3e-66	sp|P23825|GATA3_CHICK	8e-62	GATA-binding factor 3 OS=Gallus gallus GN=GATA3 PE=2 SV=1	KOG1601	5e-60	GATA-4/5/6 transcription factors							GO:0000790;GO:0005730;GO:0005654;GO:0005634;GO:0005667;GO:0003682;GO:0000987;GO:0070888;GO:0001158;GO:0000979;GO:0000977;GO:0001085;GO:0003713;GO:0044212;GO:0001077;GO:0001228;GO:0001078;GO:0008270;GO:0048646;GO:0003180;GO:0042491;GO:0007411;GO:0061290;GO:0003215;GO:0048468;GO:0045165;GO:0001709;GO:0048469;GO:0071773;GO:0035457;GO:0071353;GO:0071356;GO:0048589;GO:0048565;GO:0043583;GO:0035162;GO:…	nuclear chromatin|nucleolus|nucleoplasm|nucleus|transcription factor complex|chromatin binding|core promoter proximal region sequence-specific DNA binding|E-box binding|enhancer sequence-specific DNA binding|RNA polymerase II core promoter sequence-specific DNA binding|RNA polymerase II regulatory region sequence-specific DNA binding|RNA polymerase II transcription factor binding|transcription co…
comp112683_c0_seq3	22807.7	7.07107	45608.4	6450	12.6551	0.017399	1	Up	0.534287	1682.26	625
comp112689_c0_seq1	1475.38	2950.76	0	0	#NAME?	0.000632954	0.33299	Down	28.8187	0	4611	gi|939245574|ref|XP_014242166.1|PREDICTED: vigilin [Cimex lectularius]	1e-12
comp112787_c0_seq1	21275.4	7.07107	42543.8	6016.6	12.5547	0.015201	0.995178	Up	0.228258	721.141	1360
comp112834_c0_seq1	16644.9	3.53553	33286.3	9414.8	13.2007	0.00688718	0.653785	Up	0.187088	869.026	883
comp112849_c2_seq2	2561.14	11.3137	5110.97	451.75	8.81938	0.00397282	0.503006	Up	1.34468	315.019	374
comp112857_c0_seq1	615.536	1212.69	18.3848	0.0151603	-6.04355	0.0330223	1	Down	27.4755	0.217324	1988	gi|1022756411|gb|KZS03206.1|Uncharacterized protein APZ42_034059 [Daphnia magna]	1e-29
comp112859_c0_seq2	876.105	1750.8	1.41421	0.000807754	-10.2738	0.00256838	0.410115	Down	35.3954	0.0124769	2228	gi|699242664|ref|XP_004226120.2|PREDICTED: LOW QUALITY PROTEIN: dynein regulatory complex protein 1-like [Ciona intestinalis]	3e-27	sp|F1QRC1|DRC1_DANRE	5e-25	Dynein regulatory complex protein 1 OS=Danio rerio GN=drc1 PE=2 SV=1										GO:0005930;GO:0005856;GO:0070286;GO:0071973;GO:0060285	axoneme|cytoskeleton|axonemal dynein complex assembly|bacterial-type flagellum-dependent cell motility|cilium-dependent cell motility
comp112885_c0_seq1	1070.91	6.36396	2135.46	335.556	8.39041	0.00521882	0.561942	Up	0.335065	56.5986	870
comp112890_c0_seq1	93.3381	0	186.676	Inf	Inf	0.0392116	1	Up	0	6.14926	702
comp112897_c0_seq1	701.45	0	1402.9	Inf	Inf	0.000854956	0.33299	Up	0	31.7871	1017
comp112956_c0_seq1	193.04	0	386.08	Inf	Inf	0.0120463	0.872997	Up	0	7.63347	1166
comp112981_c0_seq1	502.399	3.53553	1001.26	283.2	8.14568	0.00952993	0.767701	Up	0.238809	38.3498	602
comp112985_c0_seq1	634.982	1.41421	1268.55	897	9.80896	0.00315108	0.447616	Up	0.11118	55.7799	524
comp113033_c0_seq2	299.813	0	599.627	Inf	Inf	0.00471627	0.541981	Up	0	16.8277	822
comp113079_c0_seq6	576.646	6.36396	1146.93	180.222	7.49363	0.0127285	0.90344	Up	0.319321	29.9197	884
comp113109_c0_seq2	400.93	0	801.859	Inf	Inf	0.00250733	0.410115	Up	0	16.4497	1123
comp113118_c0_seq2	2074.65	2.82843	4146.47	1466	10.5177	0.00123437	0.34072	Up	0.123372	100.506	951
comp113139_c0_seq1	639.225	0	1278.45	Inf	Inf	0.00100414	0.33299	Up	0	33.0055	893	gi|307204262|gb|EFN83058.1|Transposable element Tc3 transposase, partial [Harpegnathos saltator]	7e-12
comp113154_c0_seq1	1893.28	0.707107	3785.85	5354	12.3864	0.000496653	0.33299	Up	0.0135737	32.0737	2721	gi|443692615|gb|ELT94190.1|hypothetical protein CAPTEDRAFT_75194, partial [Capitella teleta]	3e-25	sp|Q3USF0|B3GN6_MOUSE	2e-15	UDP-GlcNAc:betaGal beta-1,3-N-acetylglucosaminyltransferase 6 OS=Mus musculus GN=B3gnt6 PE=2 SV=2	KOG2287	5e-21	Galactosyltransferases	ko00601	Glycosphingolipid biosynthesis - lacto and neolacto series	1	K07819	B3GALT1	beta-1,3-galactosyltransferase 1	GO:0000139;GO:0016021;GO:0047224;GO:0008378;GO:0006486	Golgi membrane|integral component of membrane|acetylgalactosaminyl-O-glycosyl-glycoprotein beta-1,3-N-acetylglucosaminyltransferase activity|galactosyltransferase activity|protein glycosylation
comp113170_c0_seq1	1460.88	2921.77	0	0	#NAME?	0.0006397	0.33299	Down	110.839	0	1187
comp113187_c0_seq1	7377.95	14751.7	4.24264	0.000287604	-11.7636	0.00235788	0.406158	Down	493.202	0.0758536	1347
comp113195_c0_seq1	91.2168	0	182.434	Inf	Inf	0.0404158	1	Up	0	3.57587	1180	gi|998508533|ref|XP_015514645.1|PREDICTED: organic cation transporter protein-like isoform X2 [Neodiprion lecontei]	3e-15	sp|Q8CFZ5|S22AC_MOUSE	1e-15	Solute carrier family 22 member 12 OS=Mus musculus GN=Slc22a12 PE=1 SV=1	KOG0255	8e-13	Synaptic vesicle transporter SVOP and related transporters (major facilitator superfamily)	ko05231	Choline metabolism in cancer	1	K08202	SLC22A4_5, OCTN	MFS transporter, OCT family, solute carrier family 22 (organic cation transporter), member 4/5	GO:0016324;GO:0031526;GO:0070062;GO:0016021;GO:0005887;GO:0005886;GO:0005452;GO:0030165;GO:0015347;GO:0015143;GO:0098656;GO:1903825;GO:0042493;GO:0043252;GO:0046415;GO:0015747	apical plasma membrane|brush border membrane|extracellular exosome|integral component of membrane|integral component of plasma membrane|plasma membrane|inorganic anion exchanger activity|PDZ domain binding|sodium-independent organic anion transmembrane transporter activity|urate transmembrane transporter activity|anion transmembrane transport|organic acid transmembrane transport|response to drug|…
comp113196_c0_seq1	258.801	0	517.602	Inf	Inf	0.00650062	0.630952	Up	0	7.41682	1610	gi|985423054|ref|XP_015377005.1|PREDICTED: putative nuclease HARBI1 [Diuraphis noxia]	2e-53				KOG4585	1e-20	Predicted transposase
comp113218_c0_seq1	4320.42	0	8640.84	Inf	Inf	0.000208578	0.33299	Up	0	373.032	534
comp113226_c0_seq1	286.025	572.049	0	0	#NAME?	0.00961197	0.769783	Down	22.328	0	1154
comp113233_c0_seq2	592.555	0	1185.11	Inf	Inf	0.00115009	0.34072	Up	0	40.2909	678
comp113291_c0_seq1	335.169	0	670.337	Inf	Inf	0.00369224	0.480905	Up	0	20.1254	768
comp113311_c0_seq1	3425.23	2.82843	6847.62	2421	11.2414	0.00100179	0.33299	Up	0.0368385	41.831	3774	gi|557153712|emb|CDI79193.1|hypothetical protein EPH_0049300 [Eimeria praecox]	3e-12
comp113317_c0_seq2	416.486	2.82843	830.143	293.5	8.19722	0.0111281	0.83602	Up	0.151343	23.2826	822
comp113321_c0_seq1	89.0955	0	178.191	Inf	Inf	0.0416663	1	Up	0	5.90573	696
comp113335_c1_seq1	3814.84	7628.27	1.41421	0.000185391	-12.3971	0.000795826	0.33299	Down	483.849	0.0516385	710
comp113337_c0_seq3	85.5599	0	171.12	Inf	Inf	0.04386	1	Up	0	6.11689	646
comp113352_c0_seq2	228.749	457.498	0	0	#NAME?	0.0149815	0.990114	Down	16.5995	0	1241
comp113371_c0_seq1	1627.05	0	3254.11	Inf	Inf	0.000271867	0.33299	Up	0	62.555	1199
comp113374_c0_seq1	560.736	1.41421	1120.06	792	9.62936	0.00389786	0.499111	Up	0.052815	17.7118	1457	gi|749729692|gb|KII74573.1|hypothetical protein RF11_16183 [Thelohanellus kitauei]	4e-11
comp113388_c0_seq1	85.5599	0	171.12	Inf	Inf	0.04386	1	Up	0	11.4026	345
comp113414_c0_seq1	642.053	1282.69	1.41421	0.00110254	-9.82496	0.00414854	0.505589	Down	30.3268	0.0192222	1905
comp113432_c0_seq1	258.094	0	516.188	Inf	Inf	0.0065391	0.633438	Up	0	18.5167	643
comp113433_c0_seq1	340.825	0	681.651	Inf	Inf	0.00355946	0.476716	Up	0	16.8077	934	gi|1022773208|gb|KZS17320.1|Uncharacterized protein APZ42_016906 [Daphnia magna]	2e-32	sp|P51910|APOD_MOUSE	3e-26	Apolipoprotein D OS=Mus musculus GN=Apod PE=1 SV=1	KOG4824	9e-24	Apolipoprotein D/Lipocalin							GO:0022626;GO:0030425;GO:0005783;GO:0070062;GO:0005615;GO:0005622;GO:0043025;GO:0048471;GO:0015485;GO:0005215;GO:0007568;GO:0007420;GO:0006006;GO:0006629;GO:1900016;GO:0051895;GO:0060588;GO:0071638;GO:0010642;GO:0042308;GO:0048662;GO:2000098;GO:2000405;GO:0014012;GO:0048678;GO:0042493;GO:0000302;GO:0042246	cytosolic ribosome|dendrite|endoplasmic reticulum|extracellular exosome|extracellular space|intracellular|neuronal cell body|perinuclear region of cytoplasm|cholesterol binding|transporter activity|aging|brain development|glucose metabolic process|lipid metabolic process|negative regulation of cytokine production involved in inflammatory response|negative regulation of focal adhesion assembly|neg…
comp113437_c0_seq2	104.652	0	209.304	Inf	Inf	0.0335014	1	Up	0	2.79096	1733
comp113450_c0_seq1	7753.07	2.12132	15504	7308.67	12.8354	0.00139745	0.345759	Up	0.117586	391.473	913
comp113453_c0_seq1	438.406	1.41421	875.398	619	9.2738	0.00613487	0.610299	Up	0.0572402	24.1232	836
comp113465_c0_seq1	279.307	558.614	0	0	#NAME?	0.0100854	0.792239	Down	61.8108	0	407	gi|294948864|ref|XP_002785933.1|hypothetical protein Pmar_PMAR023656 [Perkinsus marinus ATCC 50983]	4e-07
comp113502_c0_seq1	299.46	2.12132	596.798	281.333	8.13614	0.0168349	1	Up	0.173525	21.9725	626
comp113535_c0_seq6	258.801	1.41421	516.188	365	8.51175	0.0172674	1	Up	0.0930285	19.7847	601
comp113638_c0_seq1	174.655	1.41421	347.897	246	7.94251	0.0356199	1	Up	0.127237	14.2657	563	gi|964134779|ref|XP_014764122.1|uncharacterized protein Dana_GF27937 [Drosophila ananassae]	6e-13
comp113672_c0_seq1	674.58	0	1349.16	Inf	Inf	0.000914217	0.33299	Up	0	22.5319	1381
comp113754_c0_seq7	145.664	0	291.328	Inf	Inf	0.0202296	1	Up	0	9.94827	674	gi|918278389|gb|KOF62983.1|hypothetical protein OCBIM_22021001mg [Octopus bimaculoides]	9e-06
comp113754_c1_seq1	506.288	0	1012.58	Inf	Inf	0.00155231	0.364188	Up	0	36.0927	647
comp113782_c0_seq1	545.886	0	1091.77	Inf	Inf	0.00134093	0.342918	Up	0	39.6251	635
comp113792_c0_seq1	162.635	0	325.269	Inf	Inf	0.0167343	1	Up	0	19.443	386
comp113805_c0_seq2	1954.09	2.12132	3906.06	1841.33	10.8465	0.00101712	0.33299	Up	0.122997	123.501	729
comp113809_c0_seq1	1907.07	11.3137	3802.82	336.125	8.39285	0.00494202	0.547995	Up	0.881432	152.986	573
comp113869_c0_seq1	319.612	0	639.225	Inf	Inf	0.00409798	0.505589	Up	0	10.0166	1471
comp113878_c0_seq1	1982.37	3964.75	0	0	#NAME?	0.000482361	0.33299	Down	159.568	0	1119	gi|557190745|emb|CDJ47022.1|hypothetical protein, conserved [Eimeria brunetti]	2e-06
comp113879_c0_seq1	1058.19	3.53553	2112.84	597.6	9.22304	0.00305674	0.443046	Up	0.197312	66.6373	731
comp113908_c0_seq1	4966.36	9929.9	2.82843	0.000284839	-11.7776	0.00129003	0.34072	Down	244.759	0.0391471	1827	gi|645026325|ref|XP_008212053.1|PREDICTED: innexin inx1 [Nasonia vitripennis]	1e-07
comp113934_c0_seq4	138.239	276.479	0	0	#NAME?	0.0361204	1	Down	5.77897	0	2157
comp113993_c0_seq1	1189.71	2372.34	7.07107	0.00298063	-8.39017	0.00553685	0.579293	Down	73.1249	0.108695	1461
comp114004_c1_seq1	285.671	1.41421	569.928	403	8.65464	0.014236	0.95702	Up	0.108692	26.6632	493
comp114034_c0_seq1	10042	4.94975	20079	4056.57	11.986	0.00364292	0.480273	Up	0.154192	322.571	1435
comp114047_c0_seq1	879.641	1.41421	1757.87	1243	10.2796	0.00188451	0.378845	Up	0.0524278	38.4148	1055
comp114062_c0_seq1	691.55	1.41421	1381.69	977	9.93221	0.00273914	0.42032	Up	0.0429927	18.4946	1722	gi|1022771490|gb|KZS15808.1|putative Complement C1q tumor necrosis factor-related protein 2 [Daphnia magna]	9e-28	sp|Q6UW01|CBLN3_HUMAN	3e-07	Cerebellin-3 OS=Homo sapiens GN=CBLN3 PE=1 SV=1										GO:0030054;GO:0005783;GO:0005615;GO:0005794;GO:0045202	cell junction|endoplasmic reticulum|extracellular space|Golgi apparatus|synapse
comp114084_c0_seq1	4383	7.77817	8758.22	1126	10.137	0.00244695	0.406158	Up	0.230938	137.901	1464
comp114093_c0_seq1	1313.1	2624.78	1.41421	0.000538793	-10.858	0.00150835	0.357309	Down	143.119	0.0340181	826
comp114093_c2_seq1	1673.72	3347.44	0	0	#NAME?	0.000557377	0.33299	Down	258.586	0	583
comp114131_c0_seq1	77.7817	0	155.563	Inf	Inf	0.0492292	1	Up	0	3.58334	1002
comp114133_c2_seq2	144.25	1.41421	287.085	203	7.66534	0.0480569	1	Up	0.111983	12.5672	526
comp114137_c0_seq1	4726.3	9452.6	0	0	#NAME?	0.000430839	0.33299	Down	501.397	0	849
comp114150_c0_seq1	98.9949	0	197.99	Inf	Inf	0.0362117	1	Up	0	13.9255	327
comp114220_c0_seq2	13564.1	27112.6	15.5563	0.000573768	-10.7672	0.01193	0.871095	Down	160.701	0.0478659	7598	gi|675234674|emb|CDU20460.1|conserved Plasmodium protein, unknown function [Plasmodium yoelii]	3e-06
comp114241_c0_seq1	247.487	0	494.975	Inf	Inf	0.00715532	0.663083	Up	0	12.068	946
comp114247_c0_seq1	111.723	0	223.446	Inf	Inf	0.0304854	1	Up	0	11.9314	432
comp114262_c0_seq1	89.0955	0	178.191	Inf	Inf	0.0416663	1	Up	0	11.271	364
comp114266_c0_seq3	1162.48	0	2324.97	Inf	Inf	0.000398339	0.33299	Up	0	75.0516	714
comp114281_c0_seq2	5453.91	2.82843	10905	3855.5	11.9127	0.00115998	0.34072	Up	0.249694	444.15	566
comp114283_c0_seq1	1604.07	3205.32	2.82843	0.000882418	-10.1463	0.00187629	0.378845	Down	136.943	0.0669026	1054
comp114326_c0_seq2	572.049	1141.27	2.82843	0.00247831	-8.65642	0.00759737	0.685609	Down	113.465	0.157817	453	gi|939278070|ref|XP_014259565.1|PREDICTED: tubulin glycylase 3A-like [Cimex lectularius]	6e-07	sp|A4Q9E5|TTLL3_MOUSE	2e-06	Tubulin monoglycylase TTLL3 OS=Mus musculus GN=Ttll3 PE=1 SV=1	KOG2157	3e-07	Predicted tubulin-tyrosine ligase							GO:0005930;GO:0005929;GO:0005874;GO:0015630;GO:0005524;GO:0070735;GO:0070736;GO:0035082;GO:0042384;GO:0018094	axoneme|cilium|microtubule|microtubule cytoskeleton|ATP binding|protein-glycine ligase activity|protein-glycine ligase activity, initiating|axoneme assembly|cilium assembly|protein polyglycylation
comp114338_c0_seq1	2344.77	118.794	4570.74	38.4762	5.26589	0.0485616	1	Up	8.35478	164.125	642
comp114345_c0_seq1	3304.66	0.707107	6608.62	9346	13.1901	0.000391693	0.33299	Up	0.0461814	152.502	999
comp114355_c0_seq1	1156.12	1.41421	2310.82	1634	10.6742	0.00129319	0.34072	Up	0.0458126	39.3704	1353	gi|117330|sp|P80007.1|CRA2_HOMGARecName: Full=Crustacyanin-A2 subunit	1e-25	sp|P80007|CRA2_HOMGA	2e-30	Crustacyanin-A2 subunit OS=Homarus gammarus PE=1 SV=1	KOG4824	8e-21	Apolipoprotein D/Lipocalin
comp114373_c0_seq2	336.229	2.12132	670.337	316	8.30378	0.0134723	0.930952	Up	0.0675141	9.9149	1559
comp114400_c0_seq5	159.453	0.707107	318.198	450	8.81378	0.0301603	1	Up	0.01881	3.38073	2170
comp114409_c0_seq1	188.09	0	376.181	Inf	Inf	0.0126914	0.902935	Up	0	18.7172	464
comp114440_c0_seq5	162.281	323.148	1.41421	0.00437637	-7.83605	0.049084	1	Down	14.1845	0.0465359	1027
comp114447_c0_seq1	154.149	1.41421	306.884	217	7.76155	0.0435271	1	Up	0.0822737	9.91583	715
comp114452_c0_seq1	4848.28	4.94975	9691.61	1958	10.9352	0.00169629	0.371634	Up	0.120648	123.234	1813	gi|158289397|ref|XP_311138.3|AGAP000023-PA [Anopheles gambiae str. PEST]	9e-114
comp114474_c0_seq2	86.9741	0	173.948	Inf	Inf	0.0429655	1	Up	0	8.27615	484
comp114557_c0_seq1	1560.23	2.12132	3118.34	1470	10.5216	0.00124873	0.34072	Up	0.157174	112.345	640
comp114565_c0_seq1	2563.97	46.669	5081.27	108.879	6.76658	0.0170025	1	Up	1.1692	64.7211	1810	gi|1022757815|gb|KZS04408.1|Sterol O-acyltransferase 1 [Daphnia magna]	3e-133	sp|Q61263|SOAT1_MOUSE	1e-126	Sterol O-acyltransferase 1 OS=Mus musculus GN=Soat1 PE=1 SV=2	KOG0380	2e-126	Sterol O-acyltransferase/Diacylglycerol O-acyltransferase	ko00100	Steroid biosynthesis	1	K00637	SOAT	sterol O-acyltransferase	GO:0005783;GO:0005789;GO:0016021;GO:0016020;GO:0015485;GO:0034736;GO:0000062;GO:0004772;GO:0033344;GO:0034435;GO:0042632;GO:0008203;GO:0010878;GO:0010742;GO:0042986;GO:0034379	endoplasmic reticulum|endoplasmic reticulum membrane|integral component of membrane|membrane|cholesterol binding|cholesterol O-acyltransferase activity|fatty-acyl-CoA binding|sterol O-acyltransferase activity|cholesterol efflux|cholesterol esterification|cholesterol homeostasis|cholesterol metabolic process|cholesterol storage|macrophage derived foam cell differentiation|positive regulation of am…
comp114573_c0_seq1	188.444	2.12132	374.767	176.667	7.46489	0.0393279	1	Up	0.0663641	5.55882	1553	gi|752884698|ref|XP_011260102.1|PREDICTED: uncharacterized protein LOC105253650 [Camponotus floridanus]	1e-27
comp114579_c0_seq1	171.12	0	342.24	Inf	Inf	0.0152424	0.995178	Up	0	12.3375	640
comp114596_c0_seq2	143.543	0	287.085	Inf	Inf	0.0207241	1	Up	0	13.5335	489
comp114608_c0_seq1	3219.1	6359.01	79.196	0.0124541	-6.32723	0.0254734	1	Down	83.1036	0.532817	3446	gi|340374990|ref|XP_003386020.1|PREDICTED: zinc finger MYM-type protein 1-like [Amphimedon queenslandica]	7e-95	sp|Q5SVZ6|ZMYM1_HUMAN	5e-67	Zinc finger MYM-type protein 1 OS=Homo sapiens GN=ZMYM1 PE=2 SV=1										GO:0005634;GO:0003676;GO:0008270	nucleus|nucleic acid binding|zinc ion binding
comp114648_c0_seq1	267.993	0	535.987	Inf	Inf	0.00602758	0.6076	Up	0	29.2669	422
comp114660_c0_seq2	209.657	2.12132	417.193	196.667	7.61961	0.0326319	1	Up	0.188385	17.829	540
comp114682_c0_seq2	2371.99	13.435	4730.54	352.105	8.45986	0.00495927	0.547995	Up	0.395619	71.7454	1520	gi|805756612|ref|XP_012144193.1|PREDICTED: apolipoprotein D-like isoform X1 [Megachile rotundata]	2e-12	sp|P51910|APOD_MOUSE	2e-13	Apolipoprotein D OS=Mus musculus GN=Apod PE=1 SV=1	KOG4824	3e-09	Apolipoprotein D/Lipocalin							GO:0022626;GO:0030425;GO:0005783;GO:0070062;GO:0005615;GO:0005622;GO:0043025;GO:0048471;GO:0015485;GO:0005215;GO:0007568;GO:0007420;GO:0006006;GO:0006629;GO:1900016;GO:0051895;GO:0060588;GO:0071638;GO:0010642;GO:0042308;GO:0048662;GO:2000098;GO:2000405;GO:0014012;GO:0048678;GO:0042493;GO:0000302;GO:0042246	cytosolic ribosome|dendrite|endoplasmic reticulum|extracellular exosome|extracellular space|intracellular|neuronal cell body|perinuclear region of cytoplasm|cholesterol binding|transporter activity|aging|brain development|glucose metabolic process|lipid metabolic process|negative regulation of cytokine production involved in inflammatory response|negative regulation of focal adhesion assembly|neg…
comp114683_c0_seq1	228.395	1.41421	455.377	322	8.33092	0.021915	1	Up	0.133476	23.5156	446
comp114693_c1_seq1	3775.95	2.82843	7549.07	2669	11.3821	0.00100193	0.33299	Up	0.0667865	101.3	1718	gi|1022765196|gb|KZS10461.1|putative Protein ACP24A4 [Daphnia magna]	6e-21	sp|O43278|SPIT1_HUMAN	2e-12	Kunitz-type protease inhibitor 1 OS=Homo sapiens GN=SPINT1 PE=1 SV=2	KOG4295	3e-13	Serine proteinase inhibitor (KU family)
comp114714_c0_seq1	4431.08	4.94975	8857.22	1789.43	10.8053	0.00164519	0.36897	Up	0.227592	223.411	914
comp114747_c0_seq1	283.196	0.707107	565.685	800	9.64386	0.0100544	0.790629	Up	0.0291094	11.6141	1123	gi|209489490|gb|ACI49248.1|hypothetical protein Csp3_JD06.014 [Caenorhabditis angaria]	2e-54	sp|Q96AY3|FKB10_HUMAN	2e-46	Peptidyl-prolyl cis-trans isomerase FKBP10 OS=Homo sapiens GN=FKBP10 PE=1 SV=1	KOG0549	1e-47	FKBP-type peptidyl-prolyl cis-trans isomerase
comp114751_c0_seq1	196.576	0	393.151	Inf	Inf	0.0116104	0.852821	Up	0	22.0256	411
comp114781_c1_seq1	3644.43	1.41421	7287.44	5153	12.3312	0.000595113	0.33299	Up	0.0680793	201.425	834
comp114794_c0_seq1	132.936	0	265.872	Inf	Inf	0.0234372	1	Up	0	13.8625	443
comp114806_c0_seq2	3143.09	8.48528	6277.69	739.833	9.53106	0.0027318	0.420164	Up	0.193417	72.1119	2007
comp114807_c0_seq1	126.572	253.144	0	0	#NAME?	0.0410212	1	Down	13.0858	0	871	gi|478859730|gb|AGJ70295.1|glutathione S-transferases [Macrobrachium nipponense]	1e-56	sp|O35660|GSTM6_MOUSE	2e-59	Glutathione S-transferase Mu 6 OS=Mus musculus GN=Gstm6 PE=1 SV=4	KOG1695	5e-57	Glutathione S-transferase	ko05204;ko05418;ko01524;ko00480;ko00980;ko00982	Chemical carcinogenesis|Fluid shear stress and atherosclerosis|Platinum drug resistance|Glutathione metabolism|Metabolism of xenobiotics by cytochrome P450|Drug metabolism - cytochrome P450	6	K00799	GST, gst	glutathione S-transferase	GO:0005737;GO:0004364	cytoplasm|glutathione transferase activity
comp114821_c0_seq1	233.345	0	466.69	Inf	Inf	0.00810811	0.704024	Up	0	30.3411	355
comp114822_c0_seq1	1001.97	5.65685	1998.28	353.25	8.46455	0.00508217	0.554315	Up	0.614091	106.155	434
comp114848_c0_seq1	2133.34	9.89949	4256.78	430	8.74819	0.00393564	0.50224	Up	0.438933	96.4981	1017	gi|126697426|gb|ABO26670.1|phosphoserine aminotransferase 1 isoform 1 [Haliotis discus discus]	1e-06	sp|Q99K85|SERC_MOUSE	5e-07	Phosphoserine aminotransferase OS=Mus musculus GN=Psat1 PE=1 SV=1	KOG2790	1e-07	Phosphoserine aminotransferase							GO:0005737;GO:0070062;GO:0004648;GO:0006564	cytoplasm|extracellular exosome|O-phospho-L-serine:2-oxoglutarate aminotransferase activity|L-serine biosynthetic process
comp114887_c0_seq1	13177.3	26348.9	5.65685	0.00021469	-12.1855	0.00628145	0.618267	Down	685.898	0.081183	1730	gi|1005419371|ref|XP_015752273.1|PREDICTED: putative serine/threonine-protein kinase A [Acropora digitifera]	4e-06
comp114904_c1_seq1	3136.02	6270.62	1.41421	0.00022553	-12.1144	0.000801526	0.33299	Down	195.439	0.0241613	1445
comp114919_c0_seq1	4524.78	9048.14	1.41421	0.000156299	-12.6434	0.000831975	0.33299	Down	277.568	0.0209619	1468	gi|871237452|ref|XP_012938852.1|PREDICTED: dnaJ homolog subfamily C member 7-like [Aplysia californica]	1e-18	sp|P47265|DNAJ_MYCGE	4e-13	Chaperone protein DnaJ OS=Mycoplasma genitalium (strain ATCC 33530 / G-37 / NCTC 10195) GN=dnaJ PE=3 SV=1	KOG0714	7e-13	Molecular chaperone (DnaJ superfamily)							GO:0005737;GO:0005524;GO:0008270;GO:0006260;GO:0006457;GO:0009408	cytoplasm|ATP binding|zinc ion binding|DNA replication|protein folding|response to heat
comp114933_c0_seq1	911.814	1823.63	0	0	#NAME?	0.00116828	0.34072	Down	73.6432	0	1115	gi|1005419371|ref|XP_015752273.1|PREDICTED: putative serine/threonine-protein kinase A [Acropora digitifera]	3e-08				KOG0594	5e-06	Protein kinase PCTAIRE and related kinases
comp114964_c0_seq1	3698.88	1.41421	7396.34	5230	12.3526	0.000596049	0.33299	Up	0.0447093	152.228	1120
comp114965_c1_seq1	362.039	1.41421	722.663	511	8.99718	0.00890073	0.743416	Up	0.0866516	23.9472	695
comp114976_c0_seq1	442.649	0	885.298	Inf	Inf	0.00203736	0.383236	Up	0	26.661	766
comp114989_c0_seq1	246.427	4.94975	487.904	98.5714	6.6231	0.0439941	1	Up	0.171205	8.73654	1289
comp115013_c1_seq5	136.118	272.236	0	0	#NAME?	0.0369507	1	Down	3.27402	0	3740	gi|646720703|gb|KDR22325.1|Catenin alpha [Zootermopsis nevadensis]	0	sp|P35220|CTNA_DROME	0	Catenin alpha OS=Drosophila melanogaster GN=alpha-Cat PE=1 SV=2	KOG3681	0	Alpha-catenin	ko04520;ko04390;ko05200;ko05213;ko05412;ko05100;ko04670	Adherens junction|Hippo signaling pathway|Pathways in cancer|Endometrial cancer|Arrhythmogenic right ventricular cardiomyopathy (ARVC)|Bacterial invasion of epithelial cells|Leukocyte transendothelial migration	7	K05691	CTNNA	catenin alpha	GO:0015629;GO:0005912;GO:0016342;GO:0005913;GO:0005737;GO:0005886;GO:0005914;GO:0005915;GO:0003779;GO:0008092;GO:0005198;GO:0034332;GO:0007155;GO:0007016;GO:0060429;GO:0007163;GO:0007293;GO:0060323;GO:0030720	actin cytoskeleton|adherens junction|catenin complex|cell-cell adherens junction|cytoplasm|plasma membrane|spot adherens junction|zonula adherens|actin binding|cytoskeletal protein binding|structural molecule activity|adherens junction organization|cell adhesion|cytoskeletal anchoring at plasma membrane|epithelium development|establishment or maintenance of cell polarity|germarium-derived egg cha…
comp115036_c0_seq2	135.765	0	271.529	Inf	Inf	0.0226713	1	Up	0	20.4244	307
comp115044_c0_seq2	2685.95	4.94975	5366.94	1084.29	10.0825	0.00174497	0.374719	Up	0.0771867	45.315	2730
comp115046_c0_seq1	1171.32	0.707107	2341.94	3312	11.6935	0.000823737	0.33299	Up	0.0654546	78.9198	684
comp115100_c0_seq2	2700.79	125.158	5276.43	42.1582	5.39774	0.0457618	1	Up	1.30545	28.1404	4322	gi|758375886|gb|AJO70195.1|sodium-hydrogen exchanger 3 [Cherax cainii]	0	sp|M5A7P9|SL9A3_TRISC	5e-169	Sodium/hydrogen exchanger 3 OS=Triakis scyllium GN=slc9a3 PE=1 SV=1	KOG1966	0	Sodium/hydrogen exchanger protein	ko04974;ko04976;ko04978;ko04964	Protein digestion and absorption|Bile secretion|Mineral absorption|Proximal tubule bicarbonate reclamation	4	K12040	SLC9A3, NHE3	solute carrier family 9 (sodium/hydrogen exchanger), member 3	GO:0016324;GO:0016021;GO:0015385;GO:0006885	apical plasma membrane|integral component of membrane|sodium:proton antiporter activity|regulation of pH
comp115111_c0_seq1	178.191	0	356.382	Inf	Inf	0.0141125	0.951994	Up	0	17.2285	476
comp115138_c0_seq1	363.453	721.249	5.65685	0.00784314	-6.99435	0.027336	1	Down	35.4851	0.146439	915
comp115176_c0_seq1	123.744	0	247.487	Inf	Inf	0.0261784	1	Up	0	8.25722	691
comp115200_c0_seq1	7536.34	1.41421	15071.3	10657	13.3795	0.00104764	0.334829	Up	0.0493373	350.95	990
comp115211_c0_seq1	3489.22	6965.71	12.7279	0.00182723	-9.09613	0.00410966	0.505589	Down	230.144	0.210503	1363	gi|957849556|ref|XP_014675320.1|PREDICTED: uncharacterized protein LOC106815379 [Priapulus caudatus]	4e-14
comp115211_c1_seq1	5696.45	11392.9	0	0	#NAME?	0.000500724	0.33299	Down	753.438	0	681
comp115217_c0_seq1	1368.25	0	2736.5	Inf	Inf	0.000326387	0.33299	Up	0	85.9413	734
comp115229_c0_seq4	428.507	857.013	0	0	#NAME?	0.00425748	0.51445	Down	64.8764	0	595
comp115243_c0_seq1	82.0244	0	164.049	Inf	Inf	0.0462019	1	Up	0	5.40743	698
comp115248_c0_seq3	87.6812	0	175.362	Inf	Inf	0.0425268	1	Up	0	11.3103	357
comp115265_c0_seq2	78.4889	0	156.978	Inf	Inf	0.048707	1	Up	0	2.4443	1479	gi|391346283|ref|XP_003747407.1|PREDICTED: uncharacterized protein LOC100904485 [Metaseiulus occidentalis]	6e-29
comp115275_c0_seq1	111.723	0	223.446	Inf	Inf	0.0304854	1	Up	0	15.7423	328
comp115283_c0_seq2	79.9031	0	159.806	Inf	Inf	0.0476843	1	Up	0	10.51	351
comp115299_c0_seq1	1953.03	4.24264	3901.82	919.667	9.84497	0.00185802	0.378845	Up	0.132462	62.1686	1447	gi|410934559|gb|AFV93996.1|membrane-anchored androgenic gland specific factor [Cherax quadricarinatus]	3e-17
comp115313_c0_seq1	80.6102	0	161.22	Inf	Inf	0.0471834	1	Up	0	4.60614	810
comp115364_c2_seq2	837.214	1674.43	0	0	#NAME?	0.00132691	0.342918	Down	66.1945	0	1139	gi|156356433|ref|XP_001623928.1|predicted protein [Nematostella vectensis]	3e-08
comp115374_c0_seq1	531.037	0	1062.07	Inf	Inf	0.00141398	0.345759	Up	0	70.3602	348
comp115442_c0_seq2	14167.6	2.82843	28332.4	10017	13.2902	0.00447376	0.527416	Up	0.0593412	308.079	2120
comp115487_c0_seq2	536.694	1.41421	1071.97	758	9.56605	0.00421388	0.511086	Up	0.0610893	28.3685	871
comp115536_c0_seq1	78.4889	0	156.978	Inf	Inf	0.048707	1	Up	0	7.24465	500
comp115544_c0_seq1	204.354	0	408.708	Inf	Inf	0.01072	0.822492	Up	0	5.65728	1668
comp115563_c0_seq2	162.281	324.562	0	0	#NAME?	0.0281485	1	Down	10.4184	0	1403
comp115573_c0_seq1	408.708	0	817.415	Inf	Inf	0.00240735	0.406158	Up	0	31.8963	591
comp115584_c1_seq4	113.137	0	226.274	Inf	Inf	0.0299282	1	Up	0	11.4929	453
comp115595_c0_seq1	7263.4	12.7279	14514.1	1140.33	10.1552	0.00492581	0.547995	Up	0.988823	583.923	573
comp115610_c0_seq1	283.55	0	567.1	Inf	Inf	0.00532983	0.566652	Up	0	14.711	888
comp115638_c0_seq1	120.208	0	240.416	Inf	Inf	0.0273503	1	Up	0	5.12129	1081
comp115680_c0_seq1	15273.2	4.94975	30541.4	6170.29	12.5911	0.00702238	0.659634	Up	0.094603	306.918	2294
comp115697_c0_seq1	79.9031	0	159.806	Inf	Inf	0.0476843	1	Up	0	6.92081	534
comp115774_c0_seq1	250.669	3.53553	497.803	140.8	7.1375	0.0334105	1	Up	0.318876	24.236	473
comp115779_c0_seq2	129.401	258.801	0	0	#NAME?	0.0397539	1	Down	10.2779	0	1133
comp115817_c0_seq1	469.519	927.724	11.3137	0.0121951	-6.35755	0.0316708	1	Down	17.6501	0.115717	2368	gi|321455629|gb|EFX66757.1|hypothetical protein DAPPUDRAFT_262658 [Daphnia pulex]	6e-10
comp115848_c0_seq1	301.227	1.41421	601.041	425	8.73132	0.0128193	0.907331	Up	0.0764865	15.9193	871
comp115857_c0_seq2	117.38	0	234.759	Inf	Inf	0.0283418	1	Up	0	8.65496	626
comp115861_c0_seq1	251.73	0	503.46	Inf	Inf	0.00689975	0.653785	Up	0	21.4998	540
comp115870_c1_seq3	1747.61	4.94975	3490.28	705.143	9.46177	0.00236587	0.406158	Up	0.178836	64.2591	1252
comp115915_c0_seq2	301.935	5.65685	598.212	105.75	6.72451	0.0344457	1	Up	0.0718791	4.08561	3377
comp115923_c0_seq2	541.644	1.41421	1081.87	765	9.57932	0.00414513	0.505589	Up	0.0570398	29.5325	845
comp115931_c0_seq1	118.794	0	237.588	Inf	Inf	0.0278398	1	Up	0	4.06417	1350
comp115941_c0_seq1	283.55	0	567.1	Inf	Inf	0.00532983	0.566652	Up	0	20.4522	639
comp115952_c0_seq1	96.8736	0	193.747	Inf	Inf	0.0373017	1	Up	0	6.39024	697
comp116046_c1_seq1	110.309	0	220.617	Inf	Inf	0.0310575	1	Up	0	12.919	393
comp116052_c0_seq1	232.638	0	465.276	Inf	Inf	0.00816051	0.705358	Up	0	8.29891	1291
comp116067_c0_seq1	274.711	0.707107	548.715	776	9.59991	0.0107017	0.822492	Up	0.0915765	25.6198	494
comp116091_c0_seq1	147.785	0	295.571	Inf	Inf	0.0197493	1	Up	0	9.34188	731
comp116123_c0_seq1	1167.79	10.6066	2324.97	219.2	7.7761	0.007783	0.690265	Up	0.159842	18.2375	2938	gi|919072114|ref|XP_013417343.1|PREDICTED: uncharacterized protein LOC106178626 [Lingula anatina]	1e-30
comp116151_c0_seq1	138.239	276.479	0	0	#NAME?	0.0361204	1	Down	12.2349	0	1017
comp116160_c0_seq1	10841	21677.8	4.24264	0.000195714	-12.319	0.00403832	0.505249	Down	593.837	0.0585642	1644
comp116169_c0_seq1	30063.7	9.19239	60118.2	6540	12.6751	0.0354219	1	Up	0.25183	849.724	1631
comp116174_c0_seq1	456.791	0	913.582	Inf	Inf	0.00190961	0.378845	Up	0	29.9614	703
comp116193_c1_seq2	84.8528	0	169.706	Inf	Inf	0.044316	1	Up	0	6.21045	630
comp116197_c0_seq2	644.528	3.53553	1285.52	363.6	8.50621	0.00630595	0.618267	Up	0.0805381	16.417	1805	gi|831210930|gb|AKM12288.1|fushi tarazu [Litopenaeus vannamei]	2e-62	sp|Q9IA11|HXD5_HETFR	8e-31	Homeobox protein Hox-D5 OS=Heterodontus francisci GN=HOXD5 PE=3 SV=1	KOG0489	3e-31	Transcription factor zerknullt and related HOX domain proteins							GO:0005634;GO:0043565;GO:0003700;GO:0007275;GO:0006351	nucleus|sequence-specific DNA binding|transcription factor activity, sequence-specific DNA binding|multicellular organismal development|transcription, DNA-templated
comp116202_c0_seq1	2917.52	0	5835.05	Inf	Inf	0.000193645	0.33299	Up	0	136.425	986	gi|594551820|gb|AHM10345.1|tetraspanins-like protein [Penaeus monodon]	3e-24	sp|P41731|CD63_MOUSE	1e-10	CD63 antigen OS=Mus musculus GN=Cd63 PE=1 SV=2	KOG3882	3e-07	Tetraspanin family integral membrane protein	ko04142;ko05205	Lysosome|Proteoglycans in cancer	2	K06497	CD63, MLA1, TSPAN30	CD63 antigen	GO:0009986;GO:0031904;GO:0010008;GO:0070062;GO:0005615;GO:0005887;GO:0031226;GO:0005770;GO:0031902;GO:0005765;GO:0005764;GO:0042470;GO:0097487;GO:0007155;GO:0016477;GO:0007160;GO:0034613;GO:0035646;GO:0050931;GO:0048757;GO:0043473;GO:0045807;GO:2001046;GO:0002092;GO:0015031;GO:2000680;GO:1900746	cell surface|endosome lumen|endosome membrane|extracellular exosome|extracellular space|integral component of plasma membrane|intrinsic component of plasma membrane|late endosome|late endosome membrane|lysosomal membrane|lysosome|melanosome|multivesicular body, internal vesicle|cell adhesion|cell migration|cell-matrix adhesion|cellular protein localization|endosome to melanosome transport|pigment…
comp116207_c0_seq1	16605.7	14.1421	33197.2	2347.4	11.1968	0.0147482	0.978963	Up	0.343407	416.374	1838	gi|926620148|ref|XP_013775354.1|PREDICTED: uncharacterized protein LOC106460216 [Limulus polyphemus]	2e-09
comp116250_c0_seq1	103.238	0	206.475	Inf	Inf	0.0341531	1	Up	0	8.24242	576
comp116261_c0_seq1	10605.9	1.41421	21210.4	14998	13.8725	0.00187459	0.378845	Up	0.047138	375.821	1301	gi|187474601|gb|ACD11889.1|hypothetical protein [Isometrus maculatus]	1e-32	sp|P60517|GBRAP_RAT	9e-39	Gamma-aminobutyric acid receptor-associated protein OS=Rattus norvegicus GN=Gabarap PE=1 SV=1	KOG1654	2e-39	Microtubule-associated anchor protein involved in autophagy and membrane trafficking	ko04138;ko04139;ko04140;ko04068;ko04371;ko04212;ko04621;ko04727	Autophagy - yeast|Mitophagy - yeast|Autophagy - animal|FoxO signaling pathway|Apelin signaling pathway|Longevity regulating pathway - worm|NOD-like receptor signaling pathway|GABAergic synapse	8	K08341	GABARAP, ATG8, LC3	GABA(A) receptor-associated protein	GO:0015629;GO:0005776;GO:0000421;GO:0005930;GO:0044297;GO:0031410;GO:0005829;GO:0019898;GO:0000139;GO:0005764;GO:0005874;GO:0005875;GO:0048471;GO:0005886;GO:0000407;GO:0005790;GO:0050811;GO:0008017;GO:0000045;GO:0008625;GO:0061025;GO:0000226;GO:0000422;GO:0044804;GO:0015031	actin cytoskeleton|autophagosome|autophagosome membrane|axoneme|cell body|cytoplasmic vesicle|cytosol|extrinsic component of membrane|Golgi membrane|lysosome|microtubule|microtubule associated complex|perinuclear region of cytoplasm|plasma membrane|pre-autophagosomal structure|smooth endoplasmic reticulum|GABA receptor binding|microtubule binding|autophagosome assembly|extrinsic apoptotic signali…
comp116283_c0_seq1	91.9239	0	183.848	Inf	Inf	0.0400094	1	Up	0	2.68593	1579
comp116304_c0_seq1	1062.78	0	2125.56	Inf	Inf	0.000449121	0.33299	Up	0	115.572	424
comp116308_c0_seq6	82.0244	0	164.049	Inf	Inf	0.0462019	1	Up	0	5.00257	753
comp116330_c0_seq3	13211.6	26338.3	84.8528	0.00322165	-8.27798	0.0346883	1	Down	389.03	0.644355	3049	gi|145529626|ref|XP_001450596.1|hypothetical protein [Paramecium tetraurelia strain d4-2]	2e-06
comp116376_c0_seq3	83.4386	0	166.877	Inf	Inf	0.0452464	1	Up	0	9.16552	420
comp116379_c0_seq1	3646.55	0	7293.1	Inf	Inf	0.000195327	0.33299	Up	0	191.251	879
comp116404_c0_seq1	18844.4	37676.1	12.7279	0.000337825	-11.5314	0.0173565	1	Down	463.212	0.0814411	3663	gi|154413468|ref|XP_001579764.1|viral A-type inclusion protein [Trichomonas vaginalis G3]	3e-38
comp116433_c0_seq1	224.86	0	449.72	Inf	Inf	0.00877079	0.739556	Up	0	8.86201	1171
comp116449_c0_seq3	193.394	385.373	1.41421	0.00366972	-8.09011	0.0368908	1	Down	9.04767	0.0177714	1917	gi|954579981|ref|XP_014614553.1|PREDICTED: prohormone-3 [Polistes canadensis]	3e-41	sp|P85828|PROH3_APIME	2e-38	Prohormone-3 OS=Apis mellifera PE=1 SV=1										GO:0016021	integral component of membrane
comp116474_c0_seq1	11395.7	22787.2	4.24264	0.000186185	-12.391	0.00433204	0.517143	Down	567.29	0.0555649	1809
comp116483_c0_seq1	118.087	0	236.174	Inf	Inf	0.0280892	1	Up	0	4.3766	1243
comp116508_c0_seq1	248.194	0	496.389	Inf	Inf	0.00711184	0.662293	Up	0	24.3978	469
comp116508_c1_seq1	80.6102	0	161.22	Inf	Inf	0.0471834	1	Up	0	9.01463	412
comp116510_c0_seq4	661.852	0	1323.7	Inf	Inf	0.000944896	0.33299	Up	0	29.7707	1025
comp116521_c0_seq1	178.191	0	356.382	Inf	Inf	0.0141125	0.951994	Up	0	26.1236	315
comp116560_c0_seq1	1807.72	70.0036	3545.43	50.6465	5.66239	0.0351915	1	Up	0.829465	21.598	3784
comp116582_c0_seq2	2064.04	15.5563	4112.53	264.364	8.04638	0.00640163	0.625347	Up	1.00126	134.093	707
comp116586_c0_seq2	270.115	1.41421	538.815	381	8.57365	0.0158894	1	Up	0.0599819	10.9934	1131
comp116599_c0_seq1	4680.34	26.8701	9333.81	347.368	8.44032	0.00780397	0.690265	Up	1.74956	315.048	683
comp116602_c0_seq1	1128.9	0.707107	2257.08	3192	11.6402	0.000863934	0.33299	Up	0.031463	34.3848	1513
comp116608_c0_seq1	12904.3	6.36396	25802.3	4054.44	11.9853	0.00611234	0.610299	Up	0.225603	466.531	1275
comp116622_c0_seq1	2900.55	5801.1	0	0	#NAME?	0.000398067	0.33299	Down	593.744	0	440
comp116638_c0_seq1	4518.41	9035.41	1.41421	0.000156519	-12.6414	0.000831491	0.33299	Down	400.893	0.0325663	1015
comp116674_c0_seq1	5408.31	10.6066	10806	1018.8	9.99266	0.00344773	0.470057	Up	0.588615	314.542	792
comp116677_c0_seq1	3942.12	1.41421	7882.83	5574	12.4445	0.00060256	0.33299	Up	0.0625059	198.614	915
comp116682_c0_seq1	4542.45	26.8701	9058.04	337.105	8.39706	0.00780189	0.690265	Up	0.824787	140.808	1483	gi|306478627|gb|ADM89629.1|ficolin-like protein 2 [Pacifastacus leniusculus]	4e-75	sp|Q9U8W7|TL5B_TACTR	1e-44	Techylectin-5B OS=Tachypleus tridentatus PE=1 SV=1	KOG2579	1e-42	Ficolin and related extracellular proteins							GO:0005576;GO:0030246;GO:0046872;GO:0016337	extracellular region|carbohydrate binding|metal ion binding|single organismal cell-cell adhesion
comp116704_c1_seq2	2183.55	5.65685	4361.43	771	9.59059	0.0022346	0.399897	Up	0.387353	159.587	630
comp116717_c0_seq2	534.219	14.8492	1053.59	70.9524	6.14878	0.0319126	1	Up	1.03767	37.0871	655
comp116726_c0_seq1	17358.4	34702.7	14.1421	0.000407523	-11.2608	0.016246	1	Down	1541.25	0.308066	1014
comp116733_c0_seq2	1703.77	4.94975	3402.6	687.429	9.42507	0.00242318	0.406158	Up	0.398763	131.611	596
comp116736_c0_seq1	489.318	0	978.636	Inf	Inf	0.0016612	0.369283	Up	0	33.9583	664
comp116776_c0_seq1	115.258	0	230.517	Inf	Inf	0.0291194	1	Up	0	12.5282	425
comp116785_c0_seq1	1673.72	0	3347.44	Inf	Inf	0.000264685	0.33299	Up	0	89.4284	863
comp116790_c0_seq1	8496.6	181.019	16812.2	92.875	6.53722	0.0475332	1	Up	10.8499	516.067	751
comp116807_c0_seq1	693.672	0	1387.34	Inf	Inf	0.00087139	0.33299	Up	0	79.5169	402
comp116812_c0_seq2	2556.54	13.435	5099.65	379.579	8.56826	0.00472595	0.541981	Up	1.16611	224.762	523
comp116817_c0_seq4	866.559	3.53553	1729.58	489.2	8.93428	0.00402504	0.505155	Up	0.188352	48.0448	830
comp116817_c1_seq1	972.272	1.41421	1943.13	1374	10.4242	0.0016314	0.36784	Up	0.213234	129.817	345
comp116818_c0_seq1	10401.5	11.3137	20791.8	1837.75	10.8437	0.00676773	0.646937	Up	0.282903	258.11	1857	gi|951526476|ref|XP_014467453.1|PREDICTED: jmjC domain-containing histone demethylation protein 1-like [Dinoponera quadriceps]	2e-38	sp|Q8NHM5|KDM2B_HUMAN	3e-34	Lysine-specific demethylase 2B OS=Homo sapiens GN=KDM2B PE=1 SV=1	KOG1947	1e-37	Leucine rich repeat proteins, some proteins contain F-box							GO:0005730;GO:0005654;GO:0005634;GO:0003677;GO:0032452;GO:0051864;GO:0019843;GO:0008270;GO:0006325;GO:0048596;GO:0030900;GO:0021592;GO:0030902;GO:0016577;GO:0035518;GO:0021993;GO:0021670;GO:0030901;GO:0021555;GO:2000178;GO:0043524;GO:0000122;GO:0007283;GO:0021678;GO:0006351	nucleolus|nucleoplasm|nucleus|DNA binding|histone demethylase activity|histone demethylase activity (H3-K36 specific)|rRNA binding|zinc ion binding|chromatin organization|embryonic camera-type eye morphogenesis|forebrain development|fourth ventricle development|hindbrain development|histone demethylation|histone H2A monoubiquitination|initiation of neural tube closure|lateral ventricle developmen…
comp116825_c0_seq2	878.227	0	1756.45	Inf	Inf	0.000593156	0.33299	Up	0	34.9654	1158
comp116843_c0_seq1	22240.3	44467.8	12.7279	0.000286228	-11.7705	0.0226638	1	Down	1584.33	0.224019	1264
comp116852_c0_seq1	219.203	0	438.406	Inf	Inf	0.00925628	0.75778	Up	0	25.18	401
comp116856_c0_seq2	565.685	0	1131.37	Inf	Inf	0.00125342	0.34072	Up	0	46.4198	562
comp116880_c0_seq1	5246.03	22.6274	10469.4	462.688	8.85389	0.00675107	0.646159	Up	0.555719	132.252	1825	gi|907724450|ref|XP_013113491.1|PREDICTED: alanine--glyoxylate aminotransferase 2, mitochondrial isoform X2 [Stomoxys calcitrans]	0	sp|Q17QF0|AGT2_BOVIN	0	Alanine--glyoxylate aminotransferase 2, mitochondrial OS=Bos taurus GN=AGXT2 PE=2 SV=1	KOG1404	0	Alanine-glyoxylate aminotransferase AGT2	ko00250;ko00260;ko00270;ko00280	Alanine, aspartate and glutamate metabolism|Glycine, serine and threonine metabolism|Cysteine and methionine metabolism|Valine, leucine and isoleucine degradation	4	K00827	AGXT2	alanine-glyoxylate transaminase / (R)-3-amino-2-methylpropionate-pyruvate transaminase	GO:0005739;GO:0047305;GO:0008453;GO:0042802;GO:0030170;GO:0009436;GO:0019481;GO:0045429	mitochondrion|(R)-3-amino-2-methylpropionate-pyruvate transaminase activity|alanine-glyoxylate transaminase activity|identical protein binding|pyridoxal phosphate binding|glyoxylate catabolic process|L-alanine catabolic process, by transamination|positive regulation of nitric oxide biosynthetic process
comp116887_c0_seq1	4852.87	8.48528	9697.26	1142.83	10.1584	0.00271168	0.420164	Up	0.294496	172.495	1296
comp116899_c0_seq1	3212.03	12.0208	6412.04	533.412	9.05911	0.00380167	0.491777	Up	0.401176	107.264	1378
comp116914_c0_seq1	108.187	0	216.375	Inf	Inf	0.0319443	1	Up	0	9.65982	517
comp116920_c0_seq1	96.8736	0	193.747	Inf	Inf	0.0373017	1	Up	0	3.47729	1287
comp116938_c0_seq1	4225.67	173.948	8277.39	47.5854	5.57245	0.0485075	1	Up	7.41413	180.527	1057
comp116949_c0_seq1	8975.31	17945	5.65685	0.000315234	-11.6313	0.00365939	0.480273	Down	505.092	0.0734128	1600	gi|72000503|ref|NP_001024128.1|EEA1 (Early Endosome Antigen, Rab effector) homolog [Caenorhabditis elegans]	1e-06
comp116957_c0_seq1	941.866	1883.73	0	0	#NAME?	0.00111465	0.34072	Down	74.8726	0	1133
comp117025_c0_seq1	651.952	9.89949	1294.01	130.714	7.03027	0.0160395	1	Up	0.571725	37.5971	793
comp117030_c0_seq1	999.849	1.41421	1998.28	1413	10.4645	0.00156897	0.364188	Up	0.0724797	57.5198	801
comp117031_c0_seq1	181.726	363.453	0	0	#NAME?	0.023157	1	Down	45.1779	0	362
comp117050_c0_seq1	101.116	0	202.233	Inf	Inf	0.0351626	1	Up	0	11.6558	401
comp117053_c0_seq1	545.179	1.41421	1088.94	770	9.58871	0.00409725	0.505589	Up	0.082683	41.7777	601
comp117053_c2_seq3	913.228	2.12132	1824.34	860	9.74819	0.00242341	0.406158	Up	0.185861	70.4193	597
comp117062_c0_seq1	115.966	0	231.931	Inf	Inf	0.0288568	1	Up	0	7.84584	682
comp117114_c0_seq1	438.406	1.41421	875.398	619	9.2738	0.00613487	0.610299	Up	0.0648507	20.2103	998	gi|987905713|ref|XP_015440456.1|PREDICTED: zinc finger protein 135-like [Dufourea novaeangliae]	4e-15	sp|P18729|ZG57_XENLA	1e-12	Gastrula zinc finger protein XlCGF57.1 (Fragment) OS=Xenopus laevis PE=3 SV=1	KOG1721	4e-13	FOG: Zn-finger							GO:0005634;GO:0003677;GO:0046872;GO:0006355;GO:0006351	nucleus|DNA binding|metal ion binding|regulation of transcription, DNA-templated|transcription, DNA-templated
comp117145_c0_seq1	671.044	1.41421	1340.67	948	9.88874	0.0028768	0.430707	Up	0.0511461	33.0194	936
comp117165_c0_seq1	416.132	10.6066	821.658	77.4667	6.2755	0.0343816	1	Up	0.466347	18.1945	1041
comp117170_c0_seq1	189.505	0	379.009	Inf	Inf	0.0125028	0.895808	Up	0	15.4494	565
comp117170_c1_seq3	131.522	0	263.044	Inf	Inf	0.0238329	1	Up	0	10.5476	575
comp117174_c0_seq1	847.114	0	1694.23	Inf	Inf	0.000627327	0.33299	Up	0	37.4598	1043	gi|1009550534|ref|XP_015910855.1|PREDICTED: piggyBac transposable element-derived protein 3-like [Parasteatoda tepidariorum]	6e-22	sp|Q8N328|PGBD3_HUMAN	1e-07	PiggyBac transposable element-derived protein 3 OS=Homo sapiens GN=PGBD3 PE=2 SV=3
comp117210_c0_seq1	123.744	0	247.487	Inf	Inf	0.0261784	1	Up	0	4.50493	1270
comp117231_c1_seq3	503.46	7.07107	999.849	141.4	7.14364	0.0174426	1	Up	0.55108	38.977	591
comp117237_c0_seq5	80.6102	0	161.22	Inf	Inf	0.0471834	1	Up	0	4.25096	874
comp117238_c2_seq3	2288.2	0	4576.4	Inf	Inf	0.000210122	0.33299	Up	0	230.352	458
comp117241_c0_seq1	144.25	0	288.5	Inf	Inf	0.0205577	1	Up	0	8.8171	754
comp117276_c0_seq2	1458.41	3.53553	2913.28	824	9.6865	0.00207851	0.386175	Up	0.317129	132.23	508
comp117305_c0_seq1	366.281	9.89949	722.663	73	6.18982	0.0397645	1	Up	0.804787	30.7334	542
comp117312_c0_seq2	21879.7	6.36396	43752.9	6875.11	12.7472	0.0152333	0.995178	Up	0.2314	780.675	1292	gi|330434836|gb|AEC22817.1|hypothetical protein [Macrobrachium nipponense]	6e-86	sp|F1NBL0|MUC6_CHICK	1e-12	Mucin-6 (Fragment) OS=Gallus gallus GN=MUC6 PE=1 SV=1	KOG1216	3e-11	von Willebrand factor and related coagulation proteins	ko04510;ko04151;ko04512;ko04610;ko04611	Focal adhesion|PI3K-Akt signaling pathway|ECM-receptor interaction|Complement and coagulation cascades|Platelet activation	5	K03900	VWF	von Willebrand factor	GO:0005576;GO:0030277	extracellular region|maintenance of gastrointestinal epithelium
comp117324_c0_seq1	1117.23	0	2234.46	Inf	Inf	0.000419708	0.33299	Up	0	79.8625	645
comp117338_c1_seq1	98.9949	0	197.99	Inf	Inf	0.0362117	1	Up	0	2.21767	2061
comp117342_c0_seq1	79.9031	0	159.806	Inf	Inf	0.0476843	1	Up	0	6.95139	529
comp117378_c0_seq2	127.986	0	255.973	Inf	Inf	0.024862	1	Up	0	8.41975	700
comp117380_c0_seq1	98.2878	0	196.576	Inf	Inf	0.0365704	1	Up	0	6.15897	737	gi|156397165|ref|XP_001637762.1|predicted protein [Nematostella vectensis]	3e-08
comp117382_c0_seq2	310.42	0	620.84	Inf	Inf	0.00436938	0.519964	Up	0	13.0712	1096
comp117385_c0_seq4	117.38	0	234.759	Inf	Inf	0.0283418	1	Up	0	5.79666	932
comp117400_c1_seq1	547.654	1078.34	16.9706	0.0157377	-5.98963	0.0362347	1	Down	34.3754	0.285184	1413	gi|936626702|gb|ALH22586.1|fibrinogen-related protein isoform 1 [Litopenaeus vannamei]	5e-45	sp|Q9U8W7|TL5B_TACTR	4e-40	Techylectin-5B OS=Tachypleus tridentatus PE=1 SV=1	KOG2579	7e-36	Ficolin and related extracellular proteins							GO:0005576;GO:0030246;GO:0046872;GO:0016337	extracellular region|carbohydrate binding|metal ion binding|single organismal cell-cell adhesion
comp117409_c0_seq1	217.789	434.164	1.41421	0.00325733	-8.26209	0.0299208	1	Down	15.771	0.0242625	1240
comp117447_c0_seq10	535.28	1070.56	0	0	#NAME?	0.00279253	0.42372	Down	56.1802	0	858
comp117451_c0_seq1	1296.83	60.8112	2532.86	41.6512	5.38028	0.0429396	1	Up	1.25771	26.7677	2181	gi|61162132|dbj|BAD91055.1|Af2-cadherin [Artemia franciscana]	2e-39	sp|O15943|CADN_DROME	2e-39	Neural-cadherin OS=Drosophila melanogaster GN=CadN PE=1 SV=2	KOG3594	4e-40	FOG: Cadherin repeats							GO:0030424;GO:0005911;GO:0030425;GO:0016021;GO:0005887;GO:0005886;GO:0008013;GO:0045296;GO:0005509;GO:0050839;GO:0042803;GO:0004872;GO:0048675;GO:0048846;GO:0007411;GO:0007412;GO:0007413;GO:0016339;GO:0044331;GO:0007156;GO:0050774;GO:0016318;GO:0045467;GO:0045463;GO:0048841;GO:0048814;GO:0031290	axon|cell-cell junction|dendrite|integral component of membrane|integral component of plasma membrane|plasma membrane|beta-catenin binding|cadherin binding|calcium ion binding|cell adhesion molecule binding|protein homodimerization activity|receptor activity|axon extension|axon extension involved in axon guidance|axon guidance|axon target recognition|axonal fasciculation|calcium-dependent cell-ce…
comp117457_c0_seq1	1407.14	0	2814.28	Inf	Inf	0.00031621	0.33299	Up	0	88.9761	729
comp117484_c0_seq1	2798.02	5573.42	22.6274	0.00405988	-7.94435	0.00780256	0.690265	Down	216.55	0.450143	1159
comp117489_c0_seq1	249.962	0.707107	499.217	706	9.46352	0.0129588	0.911117	Up	0.0727626	17.6996	651
comp117499_c0_seq3	126.219	0.707107	251.73	356	8.47573	0.0430427	1	Up	0.0505681	8.4884	685
comp117536_c0_seq1	924.542	1846.26	2.82843	0.00153198	-9.35039	0.00365667	0.480273	Down	61.5356	0.0490237	1351	gi|646699719|gb|KDR10217.1|Myosin regulatory light chain 2 [Zootermopsis nevadensis]	2e-51	sp|Q1HPS0|MLR_BOMMO	1e-56	Myosin regulatory light chain 2 OS=Bombyx mori PE=1 SV=1	KOG0031	2e-55	Myosin regulatory light chain, EF-Hand protein superfamily	ko04810;ko04510;ko04530;ko04611;ko04670	Regulation of actin cytoskeleton|Focal adhesion|Tight junction|Platelet activation|Leukocyte transendothelial migration	5	K12757	MYL12	myosin regulatory light chain 12	GO:0016459;GO:0005509	myosin complex|calcium ion binding
comp117559_c0_seq3	110.662	221.324	0	0	#NAME?	0.0493473	1	Down	22.3165	0	447
comp117581_c0_seq1	112.43	0	224.86	Inf	Inf	0.030205	1	Up	0	5.41324	957	gi|999965581|gb|KXJ04759.1|hypothetical protein AC249_AIPGENE8583, partial [Exaiptasia pallida]	4e-16
comp117595_c0_seq1	181.019	0	362.039	Inf	Inf	0.013688	0.935619	Up	0	9.55823	872
comp117600_c0_seq2	84.8528	0	169.706	Inf	Inf	0.044316	1	Up	0	2.54561	1540
comp117611_c0_seq3	108.187	0	216.375	Inf	Inf	0.0319443	1	Up	0	7.61955	654
comp117618_c0_seq1	1302.14	0.707107	2603.57	3682	11.8463	0.000723077	0.33299	Up	0.0505333	68.4515	877
comp117650_c0_seq2	96.8736	0	193.747	Inf	Inf	0.0373017	1	Up	0	5.98215	749
comp117652_c0_seq2	660.791	20.5061	1301.08	63.4483	5.98751	0.0322815	1	Up	2.45085	79.5503	377
comp117673_c0_seq1	957.776	2.12132	1913.43	902	9.81698	0.00226531	0.401214	Up	0.116553	48.5304	909
comp117674_c2_seq1	3185.52	6369.62	1.41421	0.000222025	-12.137	0.000799387	0.33299	Down	254.308	0.0335872	1128
comp117691_c0_seq1	10110.6	3.53553	20217.6	5718.4	12.4814	0.00295139	0.434292	Up	0.231238	623.936	747
comp117699_c0_seq1	958.837	7.07107	1910.6	270.2	8.07788	0.00668611	0.642441	Up	0.311294	44.0946	999
comp117742_c1_seq1	147.078	1.41421	292.742	207	7.69349	0.0467064	1	Up	0.101363	14.1206	477
comp117774_c0_seq2	82.0244	0	164.049	Inf	Inf	0.0462019	1	Up	0	5.64314	673
comp117789_c0_seq2	274.711	2.12132	547.301	258	8.01123	0.0198451	1	Up	0.196023	27.1667	464
comp117797_c0_seq1	567.807	18.3848	1117.23	60.7692	5.92527	0.0358906	1	Up	0.957836	29.6159	870
comp117799_c0_seq1	516.895	1032.38	1.41421	0.00136986	-9.51175	0.00598675	0.605567	Down	55.3342	0.0353016	840
comp117808_c1_seq1	23135.5	46258.2	12.7279	0.000275149	-11.8275	0.0243824	1	Down	1044.22	0.149998	1995	gi|123472754|ref|XP_001319569.1|viral A-type inclusion protein [Trichomonas vaginalis G3]	4e-19
comp117820_c0_seq1	127.986	0	255.973	Inf	Inf	0.024862	1	Up	0	6.28579	937
comp117829_c0_seq1	1610.44	7.77817	3213.09	413.091	8.69032	0.00397473	0.503006	Up	0.145123	30.2069	2452	gi|972174770|ref|XP_015183955.1|PREDICTED: furin-like protease 1, isoform 1-CRR isoform X1 [Polistes dominula]	0	sp|P30430|FUR1C_DROME	0	Furin-like protease 1, isoform 1-CRR OS=Drosophila melanogaster GN=Fur1 PE=2 SV=2	KOG3525	0	Subtilisin-like proprotein convertase	ko05164	Influenza A	1	K01349	FURIN, PCSK3	furin	GO:0000139;GO:0016021;GO:0005886;GO:0004252;GO:0097688;GO:0001941;GO:0097090;GO:0016485;GO:0008039	Golgi membrane|integral component of membrane|plasma membrane|serine-type endopeptidase activity|glutamate receptor clustering|postsynaptic membrane organization|presynaptic membrane organization|protein processing|synaptic target recognition
comp117841_c1_seq1	173.241	0	346.482	Inf	Inf	0.0148929	0.985115	Up	0	14.7671	540
comp117845_c0_seq5	89.0955	0	178.191	Inf	Inf	0.0416663	1	Up	0	6.42077	640
comp117849_c0_seq1	1105.56	21.9203	2189.2	99.871	6.64199	0.0175975	1	Up	1.48043	76.5616	659
comp117864_c0_seq1	5302.59	10605.2	0	0	#NAME?	0.000468447	0.33299	Down	299.256	0	1596	gi|829102832|ref|XP_001008382.2|Serine/Threonine kinase domain protein [Tetrahymena thermophila SB210]	8e-10	sp|B4IT27|DCLK_DROYA	3e-09	Serine/threonine-protein kinase GE16371 OS=Drosophila yakuba GN=GE16371 PE=3 SV=2	KOG0587	3e-09	Traf2- and Nck-interacting kinase and related germinal center kinase (GCK) family protein kinases	ko04214;ko04520;ko04140;ko04010;ko04013;ko04064;ko04152;ko04310;ko04668;ko05418;ko05140;ko05145;ko05162;ko05168;ko05169;ko04380;ko04620;ko04621;ko04622;ko04624;ko04657;ko04660	Apoptosis - fly|Adherens junction|Autophagy - animal|MAPK signaling pathway|MAPK signaling pathway - fly|NF-kappa B signaling pathway|AMPK signaling pathway|Wnt signaling pathway|TNF signaling pathway|Fluid shear stress and atherosclerosis|Leishmaniasis|Toxoplasmosis|Measles|Herpes simplex infection|Epstein-Barr virus infection|Osteoclast differentiation|Toll-like receptor signaling pathway|NOD-l…	22	K04427	MAP3K7, TAK1	mitogen-activated protein kinase kinase kinase 7	GO:0005622;GO:0005524;GO:0004674;GO:0035556;GO:0006468	intracellular|ATP binding|protein serine/threonine kinase activity|intracellular signal transduction|protein phosphorylation
comp117865_c0_seq3	111.016	222.032	0	0	#NAME?	0.0491365	1	Down	3.58334	0	2791	gi|999979286|gb|KXJ18460.1|hypothetical protein AC249_AIPGENE27992 [Exaiptasia pallida]	4e-80
comp117881_c0_seq1	351.432	0	702.864	Inf	Inf	0.0033292	0.463059	Up	0	31.8234	509
comp117889_c0_seq1	297.692	0	595.384	Inf	Inf	0.0047904	0.544425	Up	0	20.3097	676
comp117905_c0_seq1	98.9949	0	197.99	Inf	Inf	0.0362117	1	Up	0	5.87486	777
comp117912_c0_seq1	159.806	0	319.612	Inf	Inf	0.0172663	1	Up	0	8.26465	891
comp117916_c0_seq4	847.821	1.41421	1694.23	1198	10.2264	0.00199076	0.381079	Up	0.130951	87.1793	448
comp117942_c0_seq1	247.487	0	494.975	Inf	Inf	0.00715532	0.663083	Up	0	10.8731	1049
comp117961_c0_seq2	79.9031	0	159.806	Inf	Inf	0.0476843	1	Up	0	3.47723	1063	gi|585714216|ref|XP_006825228.1|PREDICTED: fibrous sheath CABYR-binding protein-like isoform X2 [Saccoglossus kowalevskii]	5e-09
comp117969_c0_seq2	128.693	0	257.387	Inf	Inf	0.0246515	1	Up	0	2.20853	2691
comp117970_c0_seq1	645.588	16.9706	1274.21	75.0833	6.23042	0.0276162	1	Up	0.379799	14.7625	1989	gi|1022775409|gb|KZS19268.1|Disrupted in renal carcinoma protein 2 [Daphnia magna]	5e-67	sp|Q6GNV7|DIRC2_XENLA	4e-34	Disrupted in renal carcinoma protein 2 homolog OS=Xenopus laevis GN=dirc2 PE=2 SV=1	KOG2563	3e-32	Permease of the major facilitator superfamily							GO:0016021;GO:0005765;GO:0055085	integral component of membrane|lysosomal membrane|transmembrane transport
comp117978_c0_seq1	170.413	0	340.825	Inf	Inf	0.0153609	0.999502	Up	0	13.359	588
comp117980_c0_seq2	630.032	4.24264	1255.82	296	8.20945	0.00766797	0.688867	Up	0.342543	50.7132	571
comp117992_c0_seq2	229.81	0	459.619	Inf	Inf	0.00837512	0.716555	Up	0	11.9291	889
comp117994_c0_seq2	139.3	0	278.6	Inf	Inf	0.0217588	1	Up	0	6.02349	1065
comp118012_c0_seq1	304.763	609.526	0	0	#NAME?	0.0084493	0.720462	Down	14.4596	0	1898
comp118025_c0_seq2	113.137	0	226.274	Inf	Inf	0.0299282	1	Up	0	9.42312	552
comp118029_c0_seq1	239.002	0	478.004	Inf	Inf	0.00770623	0.689685	Up	0	4.6361	2379
comp118031_c0_seq4	153.442	0	306.884	Inf	Inf	0.0185331	1	Up	0	5.93719	1192
comp118041_c0_seq2	107.48	0	214.96	Inf	Inf	0.0322477	1	Up	0	6.73291	734
comp118066_c0_seq1	78.4889	0	156.978	Inf	Inf	0.048707	1	Up	0	3.41542	1056	gi|762156687|ref|XP_011416479.1|PREDICTED: uncharacterized protein LOC105320299 [Crassostrea gigas]	4e-23
comp118084_c0_seq2	285.671	0	571.342	Inf	Inf	0.00524359	0.56301	Up	0	22.6419	581
comp118093_c0_seq1	203.647	407.294	0	0	#NAME?	0.0187541	1	Down	14.9179	0	1229
comp118098_c0_seq4	1108.04	1.41421	2214.66	1566	10.6129	0.00136617	0.342918	Up	0.119413	83.151	614
comp118102_c0_seq2	7730.8	5.65685	15455.9	2732.25	11.4159	0.00277435	0.423152	Up	0.213949	311.735	1143
comp118126_c0_seq1	286.378	0	572.756	Inf	Inf	0.00521528	0.561942	Up	0	23.0772	572
comp118138_c0_seq1	2124.15	9.89949	4238.4	428.143	8.74195	0.0039488	0.50224	Up	0.36501	81.8926	1193
comp118141_c1_seq14	109.602	219.203	0	0	#NAME?	0.0499874	1	Down	6.08022	0	1624	gi|1022758271|gb|KZS04797.1|Apolipoprotein d [Daphnia magna]	5e-20	sp|P05090|APOD_HUMAN	6e-10	Apolipoprotein D OS=Homo sapiens GN=APOD PE=1 SV=1	KOG4824	4e-11	Apolipoprotein D/Lipocalin							GO:0022626;GO:0030425;GO:0005783;GO:0070062;GO:0005576;GO:0005615;GO:0043025;GO:0048471;GO:0015485;GO:0005319;GO:0007568;GO:0001525;GO:0007420;GO:0006006;GO:0006629;GO:0006869;GO:1900016;GO:0051895;GO:0060588;GO:0071638;GO:0010642;GO:0042308;GO:0048662;GO:2000098;GO:2000405;GO:0014012;GO:0048678;GO:0042493;GO:0000302;GO:0042246	cytosolic ribosome|dendrite|endoplasmic reticulum|extracellular exosome|extracellular region|extracellular space|neuronal cell body|perinuclear region of cytoplasm|cholesterol binding|lipid transporter activity|aging|angiogenesis|brain development|glucose metabolic process|lipid metabolic process|lipid transport|negative regulation of cytokine production involved in inflammatory response|negative…
comp118157_c0_seq9	948.23	19.799	1876.66	94.7857	6.5666	0.0191818	1	Up	0.889359	43.0084	1006
comp118160_c0_seq1	313.248	0	626.497	Inf	Inf	0.00428314	0.515364	Up	0	24.5204	589	gi|926614833|ref|XP_013772474.1|PREDICTED: uncharacterized protein LOC106457582 [Limulus polyphemus]	3e-07
comp118161_c0_seq1	417.547	9.19239	825.901	89.8462	6.48938	0.0300561	1	Up	0.763184	36.3375	524
comp118162_c0_seq1	181.726	0	363.453	Inf	Inf	0.0135842	0.931045	Up	0	6.95299	1206
comp118169_c0_seq1	5070.66	10134.3	7.07107	0.000697739	-10.485	0.00253584	0.410115	Down	259.012	0.0944211	1762	gi|7498700|pir||T15983hypothetical protein F09C12.2 - Caenorhabditis elegans	6e-14	sp|P57075|UBS3A_HUMAN	2e-09	Ubiquitin-associated and SH3 domain-containing protein A OS=Homo sapiens GN=UBASH3A PE=1 SV=1	KOG3734	3e-15	Predicted phosphoglycerate mutase							GO:0005829;GO:0070062;GO:0005634;GO:0050860;GO:0001817	cytosol|extracellular exosome|nucleus|negative regulation of T cell receptor signaling pathway|regulation of cytokine production
comp118240_c0_seq1	255.973	0	511.945	Inf	Inf	0.0066564	0.641961	Up	0	7.96941	1482
comp118248_c1_seq1	152.735	1.41421	304.056	215	7.74819	0.0441418	1	Up	0.154801	16.9355	414
comp118265_c0_seq2	260.922	0	521.845	Inf	Inf	0.00638705	0.624727	Up	0	6.46687	1861
comp118294_c0_seq3	266.579	0	533.159	Inf	Inf	0.0060972	0.610299	Up	0	18.4331	666
comp118297_c0_seq4	313.248	1.41421	625.082	442	8.7879	0.0118615	0.867901	Up	0.0999645	19.9883	721
comp118300_c0_seq1	428.507	0	857.013	Inf	Inf	0.00217961	0.395271	Up	0	51.0432	387
comp118311_c0_seq11	196.576	2.82843	390.323	138	7.10852	0.0437617	1	Up	0.066025	4.5918	1963
comp118360_c0_seq1	311.834	0	623.668	Inf	Inf	0.00432595	0.517143	Up	0	36.4592	394
comp118361_c0_seq3	185.969	0	371.938	Inf	Inf	0.0129809	0.911117	Up	0	10.9789	780
comp118377_c0_seq1	2400.27	4687.41	113.137	0.0241364	-5.37265	0.0453623	1	Down	226.487	2.78907	932
comp118411_c0_seq3	113.137	0	226.274	Inf	Inf	0.0299282	1	Up	0	10.339	503
comp118438_c0_seq1	514.42	1026.01	2.82843	0.00275672	-8.50283	0.00908464	0.753209	Down	26.8445	0.036675	1721	gi|961110840|ref|XP_014778848.1|PREDICTED: uncharacterized protein LOC106875275 [Octopus bimaculoides]	1e-06
comp118442_c0_seq1	793.02	1580.38	5.65685	0.00357942	-8.12606	0.00782198	0.690265	Down	39.6945	0.0645697	1793
comp118470_c0_seq1	464.216	924.189	4.24264	0.00459067	-7.76708	0.0144455	0.966023	Down	20.9108	0.0486313	1990	gi|340374226|ref|XP_003385639.1|PREDICTED: meiosis 1 arrest protein-like [Amphimedon queenslandica]	1e-08
comp118499_c1_seq2	193.747	2.82843	384.666	136	7.08746	0.0448427	1	Up	0.201752	15.2393	582
comp118501_c0_seq1	7157.69	0.707107	14314.7	20244	14.3052	0.000680662	0.33299	Up	0.0287656	247.933	1331
comp118541_c0_seq1	334.462	1.41421	667.509	472	8.88264	0.0104133	0.808316	Up	0.0567054	13.0405	1180	gi|926610241|ref|XP_013787722.1|PREDICTED: ATP-dependent RNA helicase glh-2-like [Limulus polyphemus]	6e-30
comp118545_c0_seq1	503.46	0	1006.92	Inf	Inf	0.0015696	0.364188	Up	0	18.3833	1262	gi|646715690|gb|KDR19194.1|hypothetical protein L798_06248 [Zootermopsis nevadensis]	3e-18	sp|Q61627|GRID1_MOUSE	1e-13	Glutamate receptor ionotropic, delta-1 OS=Mus musculus GN=Grid1 PE=1 SV=2	KOG1052	1e-13	Glutamate-gated kainate-type ion channel receptor subunit GluR5 and related subunits							GO:0030054;GO:0030425;GO:0070062;GO:0008328;GO:0005886;GO:0045211;GO:0005234;GO:0004970;GO:0034220;GO:0035235;GO:0035176;GO:0035249	cell junction|dendrite|extracellular exosome|ionotropic glutamate receptor complex|plasma membrane|postsynaptic membrane|extracellular-glutamate-gated ion channel activity|ionotropic glutamate receptor activity|ion transmembrane transport|ionotropic glutamate receptor signaling pathway|social behavior|synaptic transmission, glutamatergic
comp118556_c0_seq1	32792.4	6.36396	65578.5	10304.7	13.331	0.0378766	1	Up	0.297418	1586.33	953
comp118558_c0_seq1	219.91	0	439.82	Inf	Inf	0.00919356	0.755866	Up	0	23.0659	439
comp118591_c0_seq1	457.852	2.12132	913.582	430.667	8.75043	0.00751039	0.683549	Up	0.220825	54.9779	383
comp118596_c0_seq1	147.785	0	295.571	Inf	Inf	0.0197493	1	Up	0	14.2096	479
comp118603_c0_seq1	443.002	17.6777	868.327	49.12	5.61824	0.0499255	1	Up	0.5894	14.9507	1339
comp118609_c0_seq1	8073.39	16139.7	7.07107	0.000438116	-11.1564	0.0036996	0.481037	Down	467.12	0.114341	1556
comp118623_c0_seq1	127.279	0	254.558	Inf	Inf	0.025075	1	Up	0	4.12051	1425
comp118624_c0_seq2	263.751	0	527.502	Inf	Inf	0.00623981	0.615889	Up	0	16.5313	736
comp118631_c0_seq4	3045.86	6087.48	4.24264	0.000696945	-10.4867	0.00165503	0.369283	Down	80.8951	0.0302693	3389	gi|291239561|ref|XP_002739691.1|PREDICTED: protein SpAN-like [Saccoglossus kowalevskii]	1e-57	sp|P98068|SPAN_STRPU	2e-60	Protein SpAN OS=Strongylocentrotus purpuratus GN=SPAN PE=2 SV=1	KOG3714	7e-42	Meprin A metalloprotease							GO:0004222;GO:0008270;GO:0007275	metalloendopeptidase activity|zinc ion binding|multicellular organismal development
comp118652_c0_seq3	268.701	0	537.401	Inf	Inf	0.00599318	0.605567	Up	0	9.45984	1309
comp118653_c0_seq1	10032.8	20016.1	49.4975	0.00247289	-8.65959	0.0193912	1	Down	259.026	0.324491	3480	gi|321463594|gb|EFX74609.1|hypothetical protein DAPPUDRAFT_56940 [Daphnia pulex]	2e-106	sp|Q9WV75|SPON2_RAT	1e-54	Spondin-2 OS=Rattus norvegicus GN=Spon2 PE=1 SV=1	KOG3539	3e-52	Spondins, extracellular matrix proteins							GO:0031012;GO:0005578;GO:0046872;GO:0005102;GO:0007155;GO:0045087	extracellular matrix|proteinaceous extracellular matrix|metal ion binding|receptor binding|cell adhesion|innate immune response
comp118661_c0_seq4	1552.45	2.12132	3102.78	1462.67	10.5144	0.00125513	0.34072	Up	0.0549767	44.733	1599	gi|270012880|gb|EFA09328.1|hypothetical protein TcasGA2_TC001654 [Tribolium castaneum]	1e-24
comp118678_c0_seq2	8827.87	38.8909	17616.9	452.982	8.82331	0.0143019	0.959326	Up	1.74611	406.511	999
comp118690_c0_seq2	298.753	6.36396	591.141	92.8889	6.53743	0.0385534	1	Up	0.608635	27.8191	490
comp118695_c0_seq1	1563.06	51.6188	3074.5	59.5616	5.89631	0.0294632	1	Up	2.13725	64.8471	1093
comp118716_c0_seq6	561.796	0.707107	1122.89	1588	10.633	0.00256984	0.410115	Up	0.0235631	18.8883	1371
comp118723_c1_seq12	221.678	0.707107	442.649	626	9.29002	0.0164488	1	Up	0.0231286	7.53609	1353
comp118725_c0_seq8	285.671	0	571.342	Inf	Inf	0.00524359	0.56301	Up	0	7.4949	1757
comp118732_c0_seq1	3222.29	9.89949	6434.67	650	9.3443	0.00314442	0.447616	Up	0.252093	86.4911	1715	gi|71396852|ref|XP_802427.1|trans-sialidase [Trypanosoma cruzi strain CL Brener]	6e-10
comp118799_c0_seq2	305.117	3.53553	606.698	171.6	7.42291	0.0234578	1	Up	0.266507	24.0022	583
comp118810_c0_seq1	334.108	9.19239	659.024	71.6923	6.16375	0.0433639	1	Up	0.264189	9.91073	1534	gi|641650899|ref|XP_008189920.1|PREDICTED: uncharacterized protein LOC103311885 [Acyrthosiphon pisum]	3e-28
comp118811_c0_seq1	167.584	0	335.169	Inf	Inf	0.0158455	1	Up	0	8.24895	936
comp118857_c0_seq1	386.787	4.24264	769.332	181.333	7.5025	0.0176004	1	Up	0.300921	26.7689	662
comp118874_c0_seq2	113.137	0	226.274	Inf	Inf	0.0299282	1	Up	0	6.66889	784
comp118895_c0_seq1	3589.98	1.41421	7178.55	5076	12.3095	0.000594379	0.33299	Up	0.0421768	125.072	1323
comp118897_c0_seq1	99.7021	0	199.404	Inf	Inf	0.0358575	1	Up	0	4.85706	945
comp118909_c0_seq7	563.564	0	1127.13	Inf	Inf	0.0012623	0.34072	Up	0	49.2277	528
comp118928_c0_seq3	166.877	0	333.754	Inf	Inf	0.0159693	1	Up	0	14.6847	525
comp118941_c1_seq2	230.517	1.41421	459.619	325	8.3443	0.0215349	1	Up	0.0409908	6.08237	1742	gi|260835413|ref|XP_002612703.1|even-skipped homeobox a protein [Branchiostoma floridae]	2e-20	sp|P06602|EVE_DROME	2e-21	Segmentation protein even-skipped OS=Drosophila melanogaster GN=eve PE=1 SV=3	KOG0844	6e-22	Transcription factor EVX1, contains HOX domain							GO:0005634;GO:0000980;GO:0003705;GO:0003700;GO:0007512;GO:0008595;GO:0007350;GO:0045165;GO:0001709;GO:0007417;GO:0007376;GO:0007377;GO:0007507;GO:0003007;GO:0008045;GO:0007517;GO:0009997;GO:0000122;GO:0007366;GO:0045944;GO:0035289;GO:0050770;GO:1901739;GO:0006351;GO:0035290	nucleus|RNA polymerase II distal enhancer sequence-specific DNA binding|transcription factor activity, RNA polymerase II distal enhancer sequence-specific binding|transcription factor activity, sequence-specific DNA binding|adult heart development|anterior/posterior axis specification, embryo|blastoderm segmentation|cell fate commitment|cell fate determination|central nervous system development|c…
comp118944_c0_seq1	573.817	10.6066	1137.03	107.2	6.74416	0.0207369	1	Up	1.32585	72.6197	361
comp118959_c0_seq1	348.25	695.086	1.41421	0.00203459	-8.94105	0.0124377	0.891985	Down	19.3389	0.0281731	1619	gi|828212285|ref|XP_012558941.1|PREDICTED: uncharacterized protein LOC105845578 [Hydra vulgaris]	6e-13	sp|Q7Z2Y8|GVIN1_HUMAN	3e-13	Interferon-induced very large GTPase 1 OS=Homo sapiens GN=GVINP1 PE=2 SV=2										GO:0005829;GO:0005634;GO:0005525	cytosol|nucleus|GTP binding
comp118975_c0_seq1	13440	2.82843	26877.1	9502.5	13.2141	0.00405321	0.505345	Up	0.118629	603.297	1027
comp118982_c0_seq2	852.771	0	1705.54	Inf	Inf	0.000620827	0.33299	Up	0	55.287	711
comp119002_c0_seq1	873.984	1.41421	1746.55	1235	10.2703	0.00190257	0.378845	Up	0.0562966	45.7144	881
comp119008_c0_seq1	78.4889	0	156.978	Inf	Inf	0.048707	1	Up	0	2.55367	1419
comp119009_c0_seq5	4006.47	4.24264	8008.69	1887.67	10.8824	0.00141396	0.345759	Up	0.4041	386.226	478
comp119041_c0_seq1	190.565	379.716	1.41421	0.00372439	-8.06878	0.0378334	1	Down	12.8831	0.0314139	1327
comp119042_c0_seq1	2509.52	14.1421	5004.9	353.9	8.4672	0.00503447	0.550233	Up	0.57369	101.822	1133
comp119056_c0_seq2	89.0955	0	178.191	Inf	Inf	0.0416663	1	Up	0	2.37831	1728
comp119060_c0_seq1	3769.94	2.12132	7537.76	3553.33	11.795	0.000799362	0.33299	Up	0.086224	181.184	959
comp119062_c0_seq1	3222.64	6422.65	22.6274	0.00352307	-8.14895	0.00728477	0.670977	Down	196.9	0.360483	1469	gi|195042687|ref|XP_001991480.1|GH12680 [Drosophila grimshawi]	4e-21	sp|Q9VZ49|ENDOU_DROME	2e-21	Poly(U)-specific endoribonuclease homolog OS=Drosophila melanogaster GN=CG2145 PE=1 SV=1	KOG2849	5e-22	Placental protein 11							GO:0005576;GO:0004521;GO:0046872;GO:0003723;GO:0090502	extracellular region|endoribonuclease activity|metal ion binding|RNA binding|RNA phosphodiester bond hydrolysis, endonucleolytic
comp119066_c0_seq2	88.3883	0	176.777	Inf	Inf	0.0420938	1	Up	0	6.56628	620
comp119082_c0_seq1	1056.77	0.707107	2112.84	2988	11.545	0.000943433	0.33299	Up	0.0172081	22.5134	2163	gi|675369318|gb|KFM62220.1|Zinc finger protein 91, partial [Stegodyphus mimosarum]	1e-15	sp|A0PJY2|FEZF1_HUMAN	1e-11	Fez family zinc finger protein 1 OS=Homo sapiens GN=FEZF1 PE=1 SV=1	KOG1721	4e-11	FOG: Zn-finger							GO:0005634;GO:0046872;GO:0000978;GO:0000977;GO:0001227;GO:0007411;GO:0021797;GO:0008285;GO:0045892;GO:0001764;GO:0021772;GO:0045666;GO:0045893;GO:0006357;GO:0006351	nucleus|metal ion binding|RNA polymerase II core promoter proximal region sequence-specific DNA binding|RNA polymerase II regulatory region sequence-specific DNA binding|transcriptional repressor activity, RNA polymerase II transcription regulatory region sequence-specific binding|axon guidance|forebrain anterior/posterior pattern specification|negative regulation of cell proliferation|negative r…
comp119089_c0_seq2	123.744	0	247.487	Inf	Inf	0.0261784	1	Up	0	5.65483	1008
comp119103_c0_seq1	190.919	381.838	0	0	#NAME?	0.0211666	1	Down	9.47815	0	1815	gi|260812870|ref|XP_002601143.1|hypothetical protein BRAFLDRAFT_279031 [Branchiostoma floridae]	8e-56	sp|Q3SWY9|RAB28_BOVIN	2e-69	Ras-related protein Rab-28 OS=Bos taurus GN=RAB28 PE=2 SV=1	KOG0078	2e-68	GTP-binding protein SEC4, small G protein superfamily, and related Ras family GTP-binding proteins							GO:0036064;GO:0035253;GO:0005737;GO:0005886;GO:0019003;GO:0005525;GO:0007264;GO:1901998	ciliary basal body|ciliary rootlet|cytoplasm|plasma membrane|GDP binding|GTP binding|small GTPase mediated signal transduction|toxin transport
comp119110_c0_seq1	9248.6	152.028	18345.2	120.67	6.91492	0.0427656	1	Up	4.34222	268.505	1575	gi|237825144|gb|ACR20475.1|mannose-binding protein [Procambarus clarkii]	3e-39				KOG4297	2e-23	C-type lectin
comp119155_c0_seq2	106.773	0	213.546	Inf	Inf	0.032555	1	Up	0	8.28453	594
comp119164_c0_seq3	147.078	294.156	0	0	#NAME?	0.032907	1	Down	5.92021	0	2236
comp119199_c0_seq1	892.722	1785.44	0	0	#NAME?	0.00120515	0.34072	Down	81.6999	0	984
comp119219_c0_seq2	653.367	1.41421	1305.32	923	9.85019	0.00300573	0.43901	Up	0.0439059	24.6669	1220
comp119231_c0_seq1	3628.52	3.53553	7253.5	2051.6	11.0025	0.00120401	0.34072	Up	0.232852	264.989	631
comp119236_c0_seq1	23333.8	46657.7	9.89949	0.000212173	-12.2025	0.0221209	1	Down	1542.74	0.175715	1362
comp119237_c0_seq1	86.267	0	172.534	Inf	Inf	0.0434098	1	Up	0	12.4467	320
comp119241_c0_seq1	972.625	1943.84	1.41421	0.000727537	-10.4247	0.00221437	0.39931	Down	29.9114	0.0130741	2927
comp119244_c0_seq2	388.909	0	777.817	Inf	Inf	0.00267527	0.419001	Up	0	32.8236	546
comp119262_c0_seq1	373.352	2.82843	743.876	263	8.03892	0.0136247	0.932138	Up	0.103999	15.4663	1108
comp119271_c0_seq1	388.909	0	777.817	Inf	Inf	0.00267527	0.419001	Up	0	20.7055	866
comp119298_c0_seq2	679.883	1349.87	9.89949	0.00733368	-7.09125	0.0160288	1	Down	34.9223	0.138793	1741	gi|260783662|ref|XP_002586892.1|hypothetical protein BRAFLDRAFT_116066 [Branchiostoma floridae]	4e-91	sp|Q8TEA1|NSUN6_HUMAN	8e-104	Putative methyltransferase NSUN6 OS=Homo sapiens GN=NSUN6 PE=1 SV=1	KOG1122	2e-104	tRNA and rRNA cytosine-C5-methylase (nucleolar protein NOL1/NOP2)							GO:0008168;GO:0003723	methyltransferase activity|RNA binding
comp119356_c0_seq2	250.316	0	500.632	Inf	Inf	0.00698354	0.658433	Up	0	8.77896	1315
comp119368_c0_seq1	334.108	668.216	0	0	#NAME?	0.00700632	0.658956	Down	40.3001	0	747
comp119371_c0_seq1	203.647	0	407.294	Inf	Inf	0.0107972	0.82481	Up	0	4.50984	2079	gi|871232913|ref|XP_012938029.1|PREDICTED: protein-lysine N-methyltransferase EEF2KMT-like [Aplysia californica]	5e-10	sp|Q1JPJ9|EF2KT_BOVIN	2e-10	Protein-lysine N-methyltransferase EEF2KMT OS=Bos taurus GN=EEF2KMT PE=2 SV=2	KOG2497	3e-08	Predicted methyltransferase							GO:0005737;GO:0016279;GO:0018023	cytoplasm|protein-lysine N-methyltransferase activity|peptidyl-lysine trimethylation
comp119381_c1_seq1	28509.5	57002	16.9706	0.000297719	-11.7138	0.0416365	1	Down	1071.4	0.163647	2396	gi|154418773|ref|XP_001582404.1|viral A-type inclusion protein [Trichomonas vaginalis G3]	6e-10
comp119386_c0_seq1	1137.38	7.77817	2266.98	291.455	8.18713	0.0058892	0.602258	Up	0.646108	95.6898	546
comp119387_c0_seq1	3712.66	2.12132	7423.21	3499.33	11.7729	0.000798201	0.33299	Up	0.0717774	140.034	1222	gi|1009546070|ref|XP_015908997.1|PREDICTED: anaphase-promoting complex subunit 10-like [Parasteatoda tepidariorum]	3e-44	sp|Q9V831|APC10_DROME	7e-47	Anaphase-promoting complex subunit 10 OS=Drosophila melanogaster GN=APC10 PE=2 SV=2	KOG3437	2e-47	Anaphase-promoting complex (APC), subunit 10	ko04110;ko04111;ko04113;ko04114;ko04120;ko05166;ko04914	Cell cycle|Cell cycle - yeast|Meiosis - yeast|Oocyte meiosis|Ubiquitin mediated proteolysis|HTLV-I infection|Progesterone-mediated oocyte maturation	7	K03357	APC10, DOC1	anaphase-promoting complex subunit 10	GO:0005680;GO:0090302;GO:0031145;GO:0051301;GO:0007113;GO:0007067;GO:0022008;GO:0045842	anaphase-promoting complex|APC-Cdc20 complex activity|anaphase-promoting complex-dependent proteasomal ubiquitin-dependent protein catabolic process|cell division|endomitotic cell cycle|mitotic nuclear division|neurogenesis|positive regulation of mitotic metaphase/anaphase transition
comp119394_c0_seq15	473.054	0	946.109	Inf	Inf	0.00177821	0.377652	Up	0	23.2784	937
comp119404_c0_seq2	696.5	0	1393	Inf	Inf	0.000865349	0.33299	Up	0	49.0352	655
comp119407_c0_seq1	82.7315	0	165.463	Inf	Inf	0.0457209	1	Up	0	2.98213	1282
comp119417_c1_seq1	5018.34	10033.8	2.82843	0.000281889	-11.7926	0.00129714	0.34072	Down	460.16	0.0653718	982
comp119423_c0_seq2	16137.6	19.799	32255.4	1629.14	10.6699	0.0172163	1	Up	0.636895	539.991	1377	gi|939243966|ref|XP_014241309.1|PREDICTED: proclotting enzyme-like [Cimex lectularius]	2e-37	sp|Q90WD8|OVCH2_BUFJA	1e-41	Ovochymase-2 OS=Bufo japonicus GN=OVCH2 PE=1 SV=1	KOG3627	4e-44	Trypsin	ko04080;ko05164;ko04972;ko04974	Neuroactive ligand-receptor interaction|Influenza A|Pancreatic secretion|Protein digestion and absorption	4	K01312	PRSS1_2_3	trypsin	GO:0005576;GO:0046872;GO:0004252	extracellular region|metal ion binding|serine-type endopeptidase activity
comp119426_c0_seq1	21741.1	43462.3	19.799	0.000455544	-11.1001	0.0269896	1	Down	784.805	0.179046	2494
comp119431_c0_seq1	4691.65	32.5269	9350.78	287.478	8.16731	0.00935317	0.762374	Up	0.962808	142.089	1517
comp119458_c0_seq2	503.106	0.707107	1005.51	1422	10.4737	0.00315322	0.447616	Up	0.0480717	23.4328	989
comp119462_c0_seq4	217.789	1.41421	434.164	307	8.26209	0.0239695	1	Up	0.0893097	17.8119	562
comp119491_c0_seq1	370.524	0	741.048	Inf	Inf	0.00296842	0.434398	Up	0	17.4925	976
comp119499_c0_seq1	1173.44	0.707107	2346.18	3318	11.6961	0.000821838	0.33299	Up	0.0382065	48.6322	1112
comp119508_c0_seq1	1883.03	0	3766.05	Inf	Inf	0.000239121	0.33299	Up	0	68.5096	1267
comp119509_c0_seq1	4541.75	9082.08	1.41421	0.000155715	-12.6488	0.000833281	0.33299	Down	241.726	0.0190834	1692
comp119512_c0_seq1	451.841	2.82843	900.854	318.5	8.31515	0.00959141	0.769783	Up	0.0723698	10.9458	1897	gi|954594090|gb|KRZ71345.1|PiggyBac transposable element-derived protein 3 [Trichinella papuae]	5e-33	sp|Q8N328|PGBD3_HUMAN	3e-07	PiggyBac transposable element-derived protein 3 OS=Homo sapiens GN=PGBD3 PE=2 SV=3
comp119530_c0_seq1	468.105	934.795	1.41421	0.00151286	-9.36851	0.00715197	0.663083	Down	14.3995	0.0130377	2924	gi|762147401|ref|XP_011457011.1|PREDICTED: sugar phosphate exchanger 2-like [Crassostrea gigas]	7e-95	sp|Q9SA71|GLPT3_ARATH	7e-24	Putative glycerol-3-phosphate transporter 3 OS=Arabidopsis thaliana GN=At1g30560 PE=3 SV=1	KOG2533	2e-24	Permease of the major facilitator superfamily							GO:0016021;GO:0015315;GO:0006820;GO:0008643;GO:0055062;GO:0035435;GO:0055085	integral component of membrane|organophosphate:inorganic phosphate antiporter activity|anion transport|carbohydrate transport|phosphate ion homeostasis|phosphate ion transmembrane transport|transmembrane transport
comp119580_c0_seq3	1267.14	0	2534.27	Inf	Inf	0.000357382	0.33299	Up	0	43.3011	1349
comp119588_c0_seq3	995.606	2.82843	1988.38	703	9.45738	0.00272665	0.420164	Up	0.177334	58.4069	785	gi|871258718|ref|XP_005106962.2|PREDICTED: uncharacterized protein LOC101853965 [Aplysia californica]	2e-06
comp119603_c0_seq1	16218.6	54.4472	32382.7	594.753	9.21615	0.0317066	1	Up	1.13381	344.165	2169	gi|194763985|ref|XP_001964112.1|uncharacterized protein Dana_GF21384 [Drosophila ananassae]	9e-25	sp|P47980|TIS1_DROME	6e-25	Protein TIS11 OS=Drosophila melanogaster GN=Tis11 PE=2 SV=2	KOG1677	1e-25	CCCH-type Zn-finger protein	ko05166	HTLV-I infection	1	K15308	TTP	tristetraprolin	GO:0005829;GO:0005634;GO:0003677;GO:0046872;GO:0035925;GO:0003730;GO:0061158;GO:0010629;GO:1900153;GO:0016246	cytosol|nucleus|DNA binding|metal ion binding|mRNA 3'-UTR AU-rich region binding|mRNA 3'-UTR binding|3'-UTR-mediated mRNA destabilization|negative regulation of gene expression|positive regulation of nuclear-transcribed mRNA catabolic process, deadenylation-dependent decay|RNA interference
comp119621_c0_seq1	1991.21	0	3982.43	Inf	Inf	0.000229232	0.33299	Up	0	171.266	536
comp119628_c0_seq1	320.319	0	640.639	Inf	Inf	0.00407814	0.505589	Up	0	20.6919	714
comp119631_c0_seq1	21425	19.0919	42830.9	2243.41	11.1315	0.0252763	1	Up	0.400939	459.234	2150	gi|347968358|ref|XP_312238.3|AGAP002685-PA [Anopheles gambiae str. PEST]	1e-28	sp|P60517|GBRAP_RAT	5e-30	Gamma-aminobutyric acid receptor-associated protein OS=Rattus norvegicus GN=Gabarap PE=1 SV=1	KOG1654	8e-34	Microtubule-associated anchor protein involved in autophagy and membrane trafficking	ko04138;ko04139;ko04140;ko04068;ko04371;ko04212;ko04621;ko04727	Autophagy - yeast|Mitophagy - yeast|Autophagy - animal|FoxO signaling pathway|Apelin signaling pathway|Longevity regulating pathway - worm|NOD-like receptor signaling pathway|GABAergic synapse	8	K08341	GABARAP, ATG8, LC3	GABA(A) receptor-associated protein	GO:0015629;GO:0005776;GO:0000421;GO:0005930;GO:0044297;GO:0031410;GO:0005829;GO:0019898;GO:0000139;GO:0005764;GO:0005874;GO:0005875;GO:0048471;GO:0005886;GO:0000407;GO:0005790;GO:0050811;GO:0008017;GO:0000045;GO:0008625;GO:0061025;GO:0000226;GO:0000422;GO:0044804;GO:0015031	actin cytoskeleton|autophagosome|autophagosome membrane|axoneme|cell body|cytoplasmic vesicle|cytosol|extrinsic component of membrane|Golgi membrane|lysosome|microtubule|microtubule associated complex|perinuclear region of cytoplasm|plasma membrane|pre-autophagosomal structure|smooth endoplasmic reticulum|GABA receptor binding|microtubule binding|autophagosome assembly|extrinsic apoptotic signali…
comp119653_c0_seq3	135.765	271.529	0	0	#NAME?	0.0370915	1	Down	5.67446	0	2155
comp119662_c0_seq1	1020.36	52.3259	1988.38	38	5.24793	0.0483568	1	Up	1.39015	26.8872	1705
comp119668_c0_seq13	136.472	0	272.943	Inf	Inf	0.0224849	1	Up	0	6.33765	992
comp119694_c0_seq3	196.929	0.707107	393.151	556	9.11894	0.0207011	1	Up	0.0426396	9.05189	1002
comp119738_c0_seq1	8277.75	9.19239	16546.3	1800	10.8138	0.00435304	0.518833	Up	0.228901	204.418	1866
comp119739_c0_seq1	18799.8	2.82843	37596.9	13292.5	13.6983	0.00776073	0.690265	Up	0.0955758	666.195	1301
comp119742_c0_seq1	309.006	0	618.011	Inf	Inf	0.00441346	0.523564	Up	0	12.4274	1147
comp119755_c0_seq1	17226.2	34435.4	16.9706	0.000492823	-10.9866	0.0177545	1	Down	757.225	0.185874	2048	gi|260800345|ref|XP_002595094.1|hypothetical protein BRAFLDRAFT_90204 [Branchiostoma floridae]	1e-06
comp119769_c0_seq1	10166.8	7.07107	20326.5	2874.6	11.4891	0.00472886	0.541981	Up	0.249177	373.967	1253
comp119779_c1_seq2	2866.61	53.7401	5679.48	105.684	6.72362	0.0182677	1	Up	5.04251	273.901	478
comp119786_c0_seq1	8865.7	7.07107	17724.3	2506.6	11.2915	0.00390705	0.499444	Up	0.28816	368.44	1109
comp119791_c0_seq1	2411.94	4.24264	4819.64	1136	10.1497	0.00160115	0.365346	Up	0.125153	68.8396	1614
comp119796_c0_seq1	2757.72	22.6274	5492.81	242.75	7.92333	0.00767895	0.68887	Up	2.43643	304.346	416
comp119796_c1_seq2	3311.73	30.4056	6593.06	216.837	7.76047	0.0094639	0.767701	Up	1.36499	150.939	1007
comp119798_c0_seq1	1020	2040	0	0	#NAME?	0.000996371	0.33299	Down	162.895	0	564
comp119805_c0_seq1	3550.74	0.707107	7100.77	10042	13.2938	0.000392984	0.33299	Up	0.0126707	78.7392	2079	gi|321471483|gb|EFX82456.1|hypothetical protein DAPPUDRAFT_101510 [Daphnia pulex]	3e-68	sp|Q7LL04|YQK1_SCHPO	1e-31	UPF0676 protein C1494.01 OS=Schizosaccharomyces pombe (strain 972 / ATCC 24843) GN=SPCC1494.01 PE=3 SV=2	KOG0143	2e-39	Iron/ascorbate family oxidoreductases							GO:0005737;GO:0005829;GO:0005634;GO:0016491	cytoplasm|cytosol|nucleus|oxidoreductase activity
comp119809_c0_seq3	449.366	898.733	0	0	#NAME?	0.00388151	0.498596	Down	78.4469	0	516
comp119814_c1_seq1	4130.92	8134.56	127.279	0.0156467	-5.99799	0.0361568	1	Down	332.42	2.65617	1102	gi|857974660|emb|CEO99342.1|hypothetical protein PBRA_001248 [Plasmodiophora brassicae]	9e-08	sp|P0DKT1|TU92_POLAB	8e-06	Turripeptide Pal9.2 OS=Polystira albida PE=2 SV=1										GO:0005576;GO:0004867	extracellular region|serine-type endopeptidase inhibitor activity
comp119820_c0_seq3	429.214	0	858.428	Inf	Inf	0.00217212	0.394932	Up	0	59.2799	334
comp119829_c0_seq2	817.769	0.707107	1634.83	2312	11.1749	0.00137116	0.343033	Up	0.0592358	48.7544	773
comp119839_c0_seq1	1661.35	3.53553	3319.16	938.8	9.87467	0.00181834	0.378675	Up	0.410052	208.498	367
comp119839_c1_seq1	5961.26	16.2635	11906.3	732.087	9.51587	0.00527125	0.565179	Up	0.336321	124.926	2197	gi|557196769|emb|CDI85849.1|hypothetical protein EPH_0017270 [Eimeria praecox]	3e-06
comp119842_c0_seq1	2069.7	26.8701	4112.53	153.053	7.25788	0.0112781	0.841464	Up	2.35982	182.673	519
comp119843_c2_seq2	17766.8	38.1838	35495.3	929.593	9.86045	0.0285795	1	Up	2.26473	1072.44	763	gi|1005948721|ref|XP_015782678.1|PREDICTED: transcription elongation factor B polypeptide 1 [Tetranychus urticae]	4e-38	sp|P83941|ELOC_RAT	3e-46	Transcription elongation factor B polypeptide 1 OS=Rattus norvegicus GN=Tceb1 PE=1 SV=1	KOG3473	3e-47	RNA polymerase II transcription elongation factor Elongin/SIII, subunit elongin C	ko04066;ko04120;ko05200;ko05211	HIF-1 signaling pathway|Ubiquitin mediated proteolysis|Pathways in cancer|Renal cell carcinoma	4	K03872	TCEB1	transcription elongation factor B, polypeptide 1	GO:0070449;GO:0030891;GO:0032403;GO:0032968;GO:0042787;GO:0006351	elongin complex|VCB complex|protein complex binding|positive regulation of transcription elongation from RNA polymerase II promoter|protein ubiquitination involved in ubiquitin-dependent protein catabolic process|transcription, DNA-templated
comp119844_c0_seq1	6514.93	0.707107	13029.1	18426	14.1695	0.000596855	0.33299	Up	0.0160782	149.438	2010
comp119849_c0_seq3	1886.21	0.707107	3771.71	5334	12.381	0.000498156	0.33299	Up	0.0786551	151.489	574
comp119852_c0_seq5	597.505	7.07107	1187.94	168	7.39232	0.0132761	0.921595	Up	0.258402	21.5816	1269	gi|72014208|ref|XP_784087.1|PREDICTED: U5 small nuclear ribonucleoprotein 40 kDa protein [Strongylocentrotus purpuratus]	8e-14	sp|Q2HJH6|SNR40_BOVIN	2e-14	U5 small nuclear ribonucleoprotein 40 kDa protein OS=Bos taurus GN=SNRNP40 PE=2 SV=1	KOG0265	5e-15	U5 snRNP-specific protein-like factor and related proteins	ko03040	Spliceosome	1	K12857	SNRNP40, PRP8BP	Prp8 binding protein	GO:0071013;GO:0071011;GO:0005682;GO:0044822;GO:0006397;GO:0008380	catalytic step 2 spliceosome|precatalytic spliceosome|U5 snRNP|poly(A) RNA binding|mRNA processing|RNA splicing
comp119854_c0_seq1	903.682	1791.81	15.5563	0.00868193	-6.84777	0.0165665	1	Down	73.3452	0.313034	1100	gi|763431301|gb|AJQ21497.1|C-type lectin 6 [Mytilus galloprovincialis]	3e-19	sp|Q91ZW7|C209E_MOUSE	1e-17	CD209 antigen-like protein E OS=Mus musculus GN=Cd209e PE=2 SV=1	KOG4297	2e-17	C-type lectin	ko04145;ko05152	Phagosome|Tuberculosis	2	K06560	MRC, CD206, CD280	mannose receptor, C type
comp119860_c0_seq2	432.042	0	864.084	Inf	Inf	0.00214258	0.392309	Up	0	46.7795	426
comp119869_c0_seq1	6799.54	14.1421	13584.9	960.6	9.90779	0.00509091	0.554323	Up	0.274634	133.095	2353
comp119870_c2_seq4	357.089	714.178	0	0	#NAME?	0.00612154	0.610299	Down	48.2334	0	667
comp119871_c0_seq2	193.04	0	386.08	Inf	Inf	0.0120463	0.872997	Up	0	28.5212	312
comp119876_c0_seq1	7595.39	2.12132	15188.7	7160	12.8057	0.001358	0.342918	Up	0.0544321	198.387	1765	gi|313235815|emb|CBY19799.1|unnamed protein product [Oikopleura dioica]	2e-51	sp|Q03206|RAC1_CAEEL	9e-63	Ras-related protein ced-10 OS=Caenorhabditis elegans GN=ced-10 PE=1 SV=2	KOG0393	2e-63	Ras-related small GTPase, Rho type	ko04810;ko04510;ko04520;ko04530;ko04144;ko04010;ko04011;ko04014;ko04015;ko04370;ko05200;ko05203;ko05205;ko05211;ko05212;ko04932;ko04933;ko05100;ko05120;ko05130;ko05131;ko05132;ko04360;ko04912;ko04062;ko04660;ko04666;ko04670;ko04722	Regulation of actin cytoskeleton|Focal adhesion|Adherens junction|Tight junction|Endocytosis|MAPK signaling pathway|MAPK signaling pathway - yeast|Ras signaling pathway|Rap1 signaling pathway|VEGF signaling pathway|Pathways in cancer|Viral carcinogenesis|Proteoglycans in cancer|Renal cell carcinoma|Pancreatic cancer|Non-alcoholic fatty liver disease (NAFLD)|AGE-RAGE signaling pathway in diabetic …	29	K04393	CDC42	cell division control protein 42	GO:0009898;GO:0031410;GO:0005829;GO:0016021;GO:0043025;GO:0005886;GO:0005525;GO:0003924;GO:0006915;GO:0048846;GO:0031103;GO:0010171;GO:0016477;GO:0097628;GO:0033563;GO:0010172;GO:0043652;GO:0007369;GO:0008045;GO:0002119;GO:0045138;GO:0001764;GO:0048812;GO:0030334;GO:0050764;GO:0007264	cytoplasmic side of plasma membrane|cytoplasmic vesicle|cytosol|integral component of membrane|neuronal cell body|plasma membrane|GTP binding|GTPase activity|apoptotic process|axon extension involved in axon guidance|axon regeneration|body morphogenesis|cell migration|distal tip cell migration|dorsal/ventral axon guidance|embryonic body morphogenesis|engulfment of apoptotic cell|gastrulation|moto…
comp119880_c0_seq1	1032.73	2.12132	2063.34	972.667	9.9258	0.0020424	0.383236	Up	0.104507	49.1475	968
comp119881_c0_seq1	3391.64	3.53553	6779.74	1917.6	10.9051	0.00120906	0.34072	Up	0.193188	198.823	786
comp119886_c0_seq2	3941.77	6.36396	7877.17	1237.78	10.2735	0.00202007	0.383236	Up	0.120423	73.9673	2455
comp119889_c0_seq1	2126.27	0	4252.54	Inf	Inf	0.000219272	0.33299	Up	0	71.5678	1370
comp119901_c0_seq1	936.563	36.0624	1837.06	50.9412	5.67076	0.0363464	1	Up	2.25456	59.3129	714
comp119922_c0_seq1	260.922	520.431	1.41421	0.00271739	-8.52356	0.0215156	1	Down	15.6916	0.0228159	1494
comp119948_c0_seq1	350.018	0	700.036	Inf	Inf	0.00335858	0.465492	Up	0	29.9113	540
comp119951_c0_seq2	79.9031	0	159.806	Inf	Inf	0.0476843	1	Up	0	4.36116	841
comp119962_c0_seq1	386.787	770.746	2.82843	0.00366972	-8.09011	0.0150531	0.991385	Down	14.8278	0.0328034	2341	gi|1008429997|ref|XP_015840930.1|PREDICTED: uncharacterized protein LOC103315060 isoform X1 [Tribolium castaneum]	2e-10
comp119976_c0_seq1	303.349	1.41421	605.283	428	8.74147	0.0126422	0.901529	Up	0.037583	9.69586	1438	gi|919057016|ref|XP_013410330.1|PREDICTED: uncharacterized protein LOC106173677 [Lingula anatina]	4e-16
comp119981_c0_seq1	212.486	0.707107	424.264	600	9.22882	0.0178762	1	Up	0.0232695	5.18595	1889
comp119983_c0_seq2	516.895	1032.38	1.41421	0.00136986	-9.51175	0.00598675	0.605567	Down	22.2342	0.0162898	2091	gi|321472288|gb|EFX83258.1|hypothetical protein DAPPUDRAFT_48062, partial [Daphnia pulex]	4e-152	sp|Q29GB8|NAAT1_DROPS	1e-118	Sodium-dependent nutrient amino acid transporter 1 OS=Drosophila pseudoobscura pseudoobscura GN=NAAT1 PE=3 SV=1	KOG3660	1e-118	Sodium-neurotransmitter symporter							GO:0005887;GO:0042943;GO:0005328;GO:0015175;GO:0005283;GO:0003333;GO:0042940;GO:0015804;GO:1903825;GO:0006814	integral component of plasma membrane|D-amino acid transmembrane transporter activity|neurotransmitter:sodium symporter activity|neutral amino acid transmembrane transporter activity|sodium:amino acid symporter activity|amino acid transmembrane transport|D-amino acid transport|neutral amino acid transport|organic acid transmembrane transport|sodium ion transport
comp119992_c0_seq2	402.344	7.07107	797.616	112.8	6.81762	0.0253393	1	Up	0.158197	8.94724	2055	gi|123449118|ref|XP_001313281.1|ankyrin repeat protein [Trichomonas vaginalis G3]	2e-35	sp|Q7T163|KDIS_DANRE	5e-28	Kinase D-interacting substrate of 220 kDa OS=Danio rerio GN=kidins220 PE=2 SV=2	KOG0504	2e-29	FOG: Ankyrin repeat	ko04722	Neurotrophin signaling pathway	1	K12460	KIDINS220, ARMS	ankyrin repeat-rich membrane spanning protein	GO:0016021;GO:0005770;GO:0007399	integral component of membrane|late endosome|nervous system development
comp119994_c0_seq3	1373.2	18.3848	2728.02	148.385	7.2132	0.0113643	0.845397	Up	0.182859	14.0279	4484	gi|1022762940|gb|KZS08600.1|Kon-tiki [Daphnia magna]	6e-171	sp|Q6UVK1|CSPG4_HUMAN	5e-77	Chondroitin sulfate proteoglycan 4 OS=Homo sapiens GN=CSPG4 PE=1 SV=2	KOG3597	1e-112	Proteoglycan							GO:0016324;GO:0009986;GO:0070062;GO:0005576;GO:0005925;GO:0005796;GO:0005887;GO:0031258;GO:0043202;GO:0019901;GO:0004871;GO:0000187;GO:0001525;GO:0005975;GO:0016477;GO:0008283;GO:0030206;GO:0030207;GO:0030204;GO:0030208;GO:0008347;GO:0030203;GO:0035556;GO:0050731;GO:0044281;GO:0048771;GO:0007169	apical plasma membrane|cell surface|extracellular exosome|extracellular region|focal adhesion|Golgi lumen|integral component of plasma membrane|lamellipodium membrane|lysosomal lumen|protein kinase binding|signal transducer activity|activation of MAPK activity|angiogenesis|carbohydrate metabolic process|cell migration|cell proliferation|chondroitin sulfate biosynthetic process|chondroitin sulfate…
comp120010_c0_seq1	135.765	0	271.529	Inf	Inf	0.0226713	1	Up	0	6.61534	944
comp120033_c0_seq1	113.844	0	227.688	Inf	Inf	0.029655	1	Up	0	7.38279	709
comp120047_c0_seq1	298.399	2.82843	593.97	210	7.71425	0.0207323	1	Up	0.0933473	9.29092	1474
comp120048_c0_seq1	498.157	6.36396	989.949	155.556	7.28129	0.0161326	1	Up	0.421423	35.3284	646
comp120049_c1_seq1	838.629	1674.43	2.82843	0.00168919	-9.20945	0.00420198	0.51046	Down	85.5086	0.0815193	882
comp120052_c0_seq1	289.56	0.707107	578.413	818	9.67596	0.00960498	0.769783	Up	0.0179375	5.33933	2499
comp120058_c1_seq1	119.501	0	239.002	Inf	Inf	0.0275935	1	Up	0	6.69475	825
comp120093_c0_seq2	433.456	0	866.913	Inf	Inf	0.00212805	0.390592	Up	0	39.1766	510
comp120128_c0_seq2	136.118	272.236	0	0	#NAME?	0.0369507	1	Down	5.44167	0	2252
comp120136_c0_seq2	3241.38	2.82843	6479.93	2291	11.1618	0.00100801	0.33299	Up	0.215697	272.563	548
comp120163_c0_seq3	297.692	4.24264	591.141	139.333	7.1224	0.0281811	1	Up	0.169212	12.8318	1062
comp120171_c0_seq3	184.201	0.707107	367.696	520	9.02237	0.0234537	1	Up	0.0388228	7.90995	1073
comp120172_c1_seq1	90.5097	0	181.019	Inf	Inf	0.0408274	1	Up	0	4.99741	834
comp120193_c0_seq1	226.628	453.255	0	0	#NAME?	0.0152565	0.995178	Down	18.4691	0	1105
comp120195_c2_seq3	682.358	0	1364.72	Inf	Inf	0.000896325	0.33299	Up	0	21.5704	1458
comp120199_c0_seq2	183.141	0	366.281	Inf	Inf	0.0133794	0.927585	Up	0	5.90652	1427	gi|961107607|ref|XP_014777721.1|PREDICTED: uncharacterized protein LOC106874491 [Octopus bimaculoides]	2e-36
comp120201_c0_seq2	101.823	0	203.647	Inf	Inf	0.0348217	1	Up	0	4.15992	1132
comp120241_c0_seq2	500.632	1.41421	999.849	707	9.46557	0.00478203	0.54429	Up	0.0612639	22.517	1024
comp120286_c0_seq3	87.6812	0	175.362	Inf	Inf	0.0425268	1	Up	0	12.0969	335
comp120289_c1_seq1	1253.7	22.6274	2484.77	109.812	6.7789	0.0156681	1	Up	0.639971	36.0293	1590
comp120376_c0_seq1	747.765	30.4056	1465.13	48.186	5.59054	0.0406872	1	Up	1.03962	25.5507	1322
comp120387_c0_seq4	216.375	0	432.749	Inf	Inf	0.00951316	0.767701	Up	0	10.3834	960
comp120390_c0_seq1	175.362	349.311	1.41421	0.00404858	-7.94837	0.0434479	1	Down	7.73948	0.0167959	2033	gi|919038443|ref|XP_013402699.1|PREDICTED: neutral ceramidase-like [Lingula anatina]	8e-100	sp|Q9VA70|NCASE_DROME	2e-100	Neutral ceramidase OS=Drosophila melanogaster GN=CDase PE=1 SV=1	KOG2232	4e-101	Ceramidases	ko04071;ko00600	Sphingolipid signaling pathway|Sphingolipid metabolism	2	K12349	ASAH2	neutral ceramidase	GO:0005737;GO:0005576;GO:0017040;GO:0046514;GO:0035187;GO:0042759;GO:0045494;GO:0006665;GO:0046512;GO:0007268;GO:0016079;GO:0031629	cytoplasm|extracellular region|ceramidase activity|ceramide catabolic process|hatching behavior|long-chain fatty acid biosynthetic process|photoreceptor cell maintenance|sphingolipid metabolic process|sphingosine biosynthetic process|synaptic transmission|synaptic vesicle exocytosis|synaptic vesicle fusion to presynaptic membrane
comp120414_c0_seq1	83.4386	0	166.877	Inf	Inf	0.0452464	1	Up	0	3.02255	1278
comp120415_c0_seq1	289.914	2.82843	576.999	204	7.67243	0.0218771	1	Up	0.243571	24.5923	541
comp120461_c0_seq1	173.948	0	347.897	Inf	Inf	0.0147784	0.979253	Up	0	10.1942	786
comp120511_c0_seq1	234.759	0	469.519	Inf	Inf	0.00800478	0.698267	Up	0	9.93252	1091
comp120526_c0_seq6	89.0955	0	178.191	Inf	Inf	0.0416663	1	Up	0	4.5104	913
comp120550_c0_seq1	233.345	4.24264	462.448	109	6.76818	0.0430841	1	Up	0.0968026	5.06319	2105
comp120571_c0_seq1	662.913	1323	2.82843	0.00213789	-8.86959	0.00599943	0.605567	Down	34.7022	0.0310277	1717
comp120580_c1_seq2	571.696	13.435	1129.96	84.1053	6.39412	0.0261827	1	Up	0.996614	42.7081	610
comp120606_c1_seq1	393.505	10.6066	776.403	73.2	6.19377	0.0376244	1	Up	1.37928	51.4617	348
comp120617_c0_seq1	1569.07	0	3138.14	Inf	Inf	0.000281734	0.33299	Up	0	69.24	1045
comp120623_c0_seq8	111.369	222.739	0	0	#NAME?	0.048927	1	Down	4.40996	0	2276	gi|939245016|ref|XP_014241866.1|PREDICTED: peroxidase-like [Cimex lectularius]	0	sp|Q9VEG6|PERC_DROME	4e-105	Chorion peroxidase OS=Drosophila melanogaster GN=Pxt PE=2 SV=3	KOG2408	0	Peroxidase/oxygenase							GO:0005615;GO:0005875;GO:0020037;GO:0046872;GO:0004601;GO:0004666;GO:0007304;GO:0007306;GO:0042744;GO:0042743;GO:0030707;GO:0001516;GO:0006979	extracellular space|microtubule associated complex|heme binding|metal ion binding|peroxidase activity|prostaglandin-endoperoxide synthase activity|chorion-containing eggshell formation|eggshell chorion assembly|hydrogen peroxide catabolic process|hydrogen peroxide metabolic process|ovarian follicle cell development|prostaglandin biosynthetic process|response to oxidative stress
comp120633_c0_seq2	106.773	0	213.546	Inf	Inf	0.032555	1	Up	0	9.70804	508
comp120633_c1_seq1	89.0955	0	178.191	Inf	Inf	0.0416663	1	Up	0	6.52852	630
comp120653_c0_seq2	354.614	702.157	7.07107	0.0100705	-6.63372	0.033842	1	Down	9.06572	0.0458501	3488
comp120687_c0_seq3	82.7315	0	165.463	Inf	Inf	0.0457209	1	Up	0	3.11836	1218
comp120718_c0_seq2	2916.46	50.2046	5782.72	115.183	6.84779	0.0168488	1	Up	0.928287	55.0863	2420	gi|1004401098|gb|EFA01513.2|Monocarboxylate transporter 6-like Protein [Tribolium castaneum]	9e-29	sp|Q90632|MOT3_CHICK	2e-17	Monocarboxylate transporter 3 OS=Gallus gallus GN=SLC16A3 PE=2 SV=2	KOG2504	8e-15	Monocarboxylate transporter							GO:0005887;GO:0015129;GO:0015293	integral component of plasma membrane|lactate transmembrane transporter activity|symporter activity
comp120722_c0_seq1	13340.6	62.9325	26618.3	422.966	8.7244	0.0283469	1	Up	1.37115	295.858	2074	gi|321470470|gb|EFX81446.1|hypothetical protein DAPPUDRAFT_303441 [Daphnia pulex]	4e-52	sp|Q9VBV3|TAKT_DROME	3e-17	Protein takeout OS=Drosophila melanogaster GN=to PE=2 SV=1										GO:0005576;GO:0005615;GO:0008343;GO:0042595;GO:0007623;GO:0007631;GO:0008049;GO:0007617;GO:0042594;GO:0007622	extracellular region|extracellular space|adult feeding behavior|behavioral response to starvation|circadian rhythm|feeding behavior|male courtship behavior|mating behavior|response to starvation|rhythmic behavior
comp120744_c1_seq2	648.417	0	1296.83	Inf	Inf	0.000979305	0.33299	Up	0	13.5211	2210
comp120746_c0_seq1	98.2878	0	196.576	Inf	Inf	0.0365704	1	Up	0	3.14069	1440
comp120768_c0_seq1	7893.08	15779.1	7.07107	0.000448129	-11.1238	0.00360292	0.479993	Down	419.482	0.103684	1694
comp120791_c0_seq2	170.766	0.707107	340.825	482	8.91289	0.0268557	1	Up	0.0266768	5.83879	1348	gi|749729166|gb|KII74199.1|hypothetical protein RF11_00573 [Thelohanellus kitauei]	6e-34
comp120818_c0_seq1	163.695	327.39	0	0	#NAME?	0.0277471	1	Down	5.02282	0	2933	gi|972193120|ref|XP_015178355.1|PREDICTED: titin-like isoform X5 [Polistes dominula]	4e-10
comp120831_c0_seq1	1157.18	2311.53	2.82843	0.00122362	-9.67463	0.00271551	0.420164	Down	79.113	0.0438019	1316	gi|146432663|gb|ABQ41232.1|male reproductive-related protein [Macrobrachium rosenbergii]	1e-41
comp120839_c0_seq1	7633.57	3.53553	15263.6	4317.2	12.0759	0.0019351	0.378845	Up	0.192364	395.818	889
comp120846_c1_seq2	2873.68	1.41421	5745.95	4063	11.9883	0.000607929	0.33299	Up	0.0696265	191.14	693
comp120848_c0_seq1	197.99	0	395.98	Inf	Inf	0.0114416	0.848648	Up	0	8.78801	1039
comp120858_c0_seq4	264.811	0.707107	528.916	748	9.54689	0.0115334	0.850635	Up	0.054457	15.5688	783
comp120861_c0_seq1	3000.25	0	6000.51	Inf	Inf	0.000192983	0.33299	Up	0	75.1731	1840	gi|571547452|ref|XP_006558419.1|PREDICTED: soluble guanylate cyclase 89Da-like isoform X2 [Apis mellifera]	9e-45	sp|Q8K1T0|TMPS3_MOUSE	7e-40	Transmembrane protease serine 3 OS=Mus musculus GN=Tmprss3 PE=1 SV=2	KOG3627	8e-43	Trypsin	ko00230	Purine metabolism	1	K01769	E4.6.1.2	guanylate cyclase, other	GO:0005783;GO:0005789;GO:0016021;GO:0043025;GO:0005044;GO:0004252;GO:0017080;GO:0006883;GO:0007605	endoplasmic reticulum|endoplasmic reticulum membrane|integral component of membrane|neuronal cell body|scavenger receptor activity|serine-type endopeptidase activity|sodium channel regulator activity|cellular sodium ion homeostasis|sensory perception of sound
comp120868_c0_seq1	5955.25	4.24264	11906.3	2806.33	11.4545	0.00170196	0.371803	Up	0.128497	176.849	1552
comp120888_c0_seq1	772.868	0	1545.74	Inf	Inf	0.000726877	0.33299	Up	0	31.7666	1122	gi|194747641|ref|XP_001956260.1|uncharacterized protein Dana_GF25120 [Drosophila ananassae]	6e-15	sp|P52746|ZN142_HUMAN	1e-09	Zinc finger protein 142 OS=Homo sapiens GN=ZNF142 PE=2 SV=4	KOG1721	3e-11	FOG: Zn-finger							GO:0005634;GO:0003677;GO:0046872;GO:0006355;GO:0006351	nucleus|DNA binding|metal ion binding|regulation of transcription, DNA-templated|transcription, DNA-templated
comp120891_c0_seq1	406.586	5.65685	807.516	142.75	7.15735	0.0205182	1	Up	0.127669	9.81938	1897
comp120894_c0_seq3	5896.21	0.707107	11791.7	16676	14.0255	0.000528639	0.33299	Up	0.0393174	251.231	1082
comp120926_c0_seq1	90.5097	0	181.019	Inf	Inf	0.0408274	1	Up	0	3.02397	1375
comp120927_c0_seq1	939.745	5.65685	1873.83	331.25	8.37178	0.00554044	0.579293	Up	0.278521	50.1566	861
comp120931_c0_seq1	5162.23	3.53553	10320.9	2919.2	11.5114	0.0013287	0.342918	Up	0.111071	154.395	1541
comp120950_c0_seq5	477.297	19.799	934.795	47.2143	5.56115	0.0497145	1	Up	0.880264	21.1734	1018
comp120969_c0_seq1	2899.84	28.2843	5771.41	204.05	7.67278	0.0093785	0.763618	Up	0.91183	95.2414	1397
comp120978_c0_seq7	164.049	0	328.098	Inf	Inf	0.016475	1	Up	0	8.46038	893
comp120979_c0_seq8	110.309	0	220.617	Inf	Inf	0.0310575	1	Up	0	9.95446	511
comp120991_c0_seq2	1897.17	1.41421	3792.92	2682	11.3891	0.000764994	0.33299	Up	0.0598415	101.563	861
comp121005_c0_seq1	706.753	6.36396	1407.14	221.111	7.78863	0.00932355	0.760778	Up	0.319841	35.2099	921
comp121010_c1_seq2	2824.89	0	5649.78	Inf	Inf	0.000194711	0.33299	Up	0	163.399	797
comp121011_c1_seq4	115.612	231.224	0	0	#NAME?	0.046512	1	Down	4.08584	0	2547
comp121015_c0_seq7	106.066	0	212.132	Inf	Inf	0.0328664	1	Up	0	4.64872	1050
comp121016_c0_seq5	886.005	1764.94	7.07107	0.00400641	-7.96347	0.00811792	0.704024	Down	60.2631	0.117626	1319	gi|3907620|gb|AAC78681.1|actin 1 [Penaeus monodon]	7e-178	sp|P49871|ACT_MANSE	0	Actin, muscle OS=Manduca sexta PE=2 SV=1	KOG0676	0	Actin and related proteins	ko04210;ko04810;ko04510;ko04520;ko04530;ko04145;ko04015;ko04390;ko04391;ko05205;ko05410;ko05412;ko05414;ko05416;ko05418;ko05100;ko05110;ko05130;ko05131;ko05132;ko05164;ko04919;ko04921;ko04611;ko04670;ko04745	Apoptosis|Regulation of actin cytoskeleton|Focal adhesion|Adherens junction|Tight junction|Phagosome|Rap1 signaling pathway|Hippo signaling pathway|Hippo signaling pathway -fly|Proteoglycans in cancer|Hypertrophic cardiomyopathy (HCM)|Arrhythmogenic right ventricular cardiomyopathy (ARVC)|Dilated cardiomyopathy (DCM)|Viral myocarditis|Fluid shear stress and atherosclerosis|Bacterial invasion of e…	26	K05692	ACTB_G1	actin beta/gamma 1	GO:0005737;GO:0005856;GO:0005524	cytoplasm|cytoskeleton|ATP binding
comp121018_c0_seq2	335.876	0	671.751	Inf	Inf	0.00367524	0.480341	Up	0	40.4284	383
comp121024_c0_seq2	299.813	0	599.627	Inf	Inf	0.00471627	0.541981	Up	0	4.99929	2768	gi|969485102|ref|XP_002138468.2|uncharacterized protein Dpse_GA24375, isoform AJ [Drosophila pseudoobscura pseudoobscura]	2e-10	sp|Q9R1Z8|VINEX_MOUSE	2e-08	Vinexin OS=Mus musculus GN=Sorbs3 PE=1 SV=1	KOG4225	7e-12	Sorbin and SH3 domain-containing protein							GO:0005737;GO:0005856;GO:0005925;GO:0005634;GO:0008134;GO:0017166;GO:0031589;GO:0000122;GO:0043410;GO:0051496	cytoplasm|cytoskeleton|focal adhesion|nucleus|transcription factor binding|vinculin binding|cell-substrate adhesion|negative regulation of transcription from RNA polymerase II promoter|positive regulation of MAPK cascade|positive regulation of stress fiber assembly
comp121028_c0_seq2	669.63	21.2132	1318.05	62.1333	5.9573	0.0327894	1	Up	0.406629	12.904	2355	gi|1009526660|ref|XP_015913162.1|PREDICTED: phosphatidylinositol 3,4,5-trisphosphate 3-phosphatase TPTE2-like [Parasteatoda tepidariorum]	3e-124	sp|Q6XPS3|TPTE2_HUMAN	3e-108	Phosphatidylinositol 3,4,5-trisphosphate 3-phosphatase TPTE2 OS=Homo sapiens GN=TPTE2 PE=1 SV=2	KOG2283	6e-102	Clathrin coat dissociation kinase GAK/PTEN/Auxilin and related tyrosine phosphatases	ko04115;ko04510;ko04140;ko04068;ko04070;ko04071;ko04150;ko04151;ko05200;ko05206;ko05213;ko05214;ko05215;ko05218;ko05222;ko05224;ko05230;ko01521;ko04931;ko05161;ko00562;ko04212	p53 signaling pathway|Focal adhesion|Autophagy - animal|FoxO signaling pathway|Phosphatidylinositol signaling system|Sphingolipid signaling pathway|mTOR signaling pathway|PI3K-Akt signaling pathway|Pathways in cancer|MicroRNAs in cancer|Endometrial cancer|Glioma|Prostate cancer|Melanoma|Small cell lung cancer|Breast cancer|Central carbon metabolism in cancer|EGFR tyrosine kinase inhibitor resista…	22	K01110	PTEN	phosphatidylinositol-3,4,5-trisphosphate 3-phosphatase and dual-specificity protein phosphatase PTEN	GO:0005789;GO:0000139;GO:0016021;GO:0016314;GO:0004725;GO:0008138;GO:0006661;GO:0006644;GO:0044281	endoplasmic reticulum membrane|Golgi membrane|integral component of membrane|phosphatidylinositol-3,4,5-trisphosphate 3-phosphatase activity|protein tyrosine phosphatase activity|protein tyrosine/serine/threonine phosphatase activity|phosphatidylinositol biosynthetic process|phospholipid metabolic process|small molecule metabolic process
comp121038_c0_seq7	123.744	0	247.487	Inf	Inf	0.0261784	1	Up	0	10.3725	550
comp121081_c0_seq4	336.583	1.41421	671.751	475	8.89178	0.0102834	0.803632	Up	0.084479	22.696	683
comp121133_c0_seq1	82.0244	0	164.049	Inf	Inf	0.0462019	1	Up	0	2.52318	1497	gi|321464454|gb|EFX75462.1|hypothetical protein DAPPUDRAFT_323345 [Daphnia pulex]	5e-08
comp121151_c0_seq1	844.639	14.8492	1674.43	112.762	6.81714	0.0166365	1	Up	0.536783	30.6236	1261
comp121152_c0_seq2	617.304	15.5563	1219.05	78.3636	6.29211	0.0270062	1	Up	0.784667	30.8255	912
comp121154_c0_seq2	20133.1	26.163	40240	1538.05	10.5869	0.0271926	1	Up	0.82786	656.041	1414
comp121180_c0_seq1	236.881	0	473.762	Inf	Inf	0.0078534	0.690625	Up	0	9.4623	1155
comp121182_c0_seq1	1104.5	15.5563	2193.45	141	7.13955	0.0123365	0.887247	Up	0.746712	54.615	926	gi|260829251|ref|XP_002609575.1|hypothetical protein BRAFLDRAFT_101933 [Branchiostoma floridae]	1e-25	sp|P05090|APOD_HUMAN	1e-32	Apolipoprotein D OS=Homo sapiens GN=APOD PE=1 SV=1	KOG4824	3e-33	Apolipoprotein D/Lipocalin							GO:0022626;GO:0030425;GO:0005783;GO:0070062;GO:0005576;GO:0005615;GO:0043025;GO:0048471;GO:0015485;GO:0005319;GO:0007568;GO:0001525;GO:0007420;GO:0006006;GO:0006629;GO:0006869;GO:1900016;GO:0051895;GO:0060588;GO:0071638;GO:0010642;GO:0042308;GO:0048662;GO:2000098;GO:2000405;GO:0014012;GO:0048678;GO:0042493;GO:0000302;GO:0042246	cytosolic ribosome|dendrite|endoplasmic reticulum|extracellular exosome|extracellular region|extracellular space|neuronal cell body|perinuclear region of cytoplasm|cholesterol binding|lipid transporter activity|aging|angiogenesis|brain development|glucose metabolic process|lipid metabolic process|lipid transport|negative regulation of cytokine production involved in inflammatory response|negative…
comp121200_c0_seq4	5482.55	37.4767	10927.6	291.585	8.18777	0.0108295	0.82481	Up	0.732566	109.002	2311	gi|514696768|ref|XP_004995954.1|NEK protein kinase [Salpingoeca rosetta]	7e-47	sp|Q9Z1J2|NEK4_MOUSE	6e-47	Serine/threonine-protein kinase Nek4 OS=Mus musculus GN=Nek4 PE=1 SV=1	KOG0589	1e-48	Serine/threonine protein kinase							GO:0005929;GO:0005737;GO:0005524;GO:0030145;GO:0004674;GO:0032147;GO:0051301;GO:0006974;GO:0000278;GO:0007067;GO:0045893;GO:0006468;GO:0042981;GO:2000772;GO:0007346;GO:1900062;GO:2001020;GO:0023014;GO:0031098	cilium|cytoplasm|ATP binding|manganese ion binding|protein serine/threonine kinase activity|activation of protein kinase activity|cell division|cellular response to DNA damage stimulus|mitotic cell cycle|mitotic nuclear division|positive regulation of transcription, DNA-templated|protein phosphorylation|regulation of apoptotic process|regulation of cellular senescence|regulation of mitotic cell c…
comp121230_c0_seq3	85.5599	0	171.12	Inf	Inf	0.04386	1	Up	0	2.178	1818
comp121239_c0_seq1	1067.38	2.12132	2132.63	1005.33	9.97346	0.00195423	0.378845	Up	0.0884081	44.5774	1103
comp121248_c0_seq1	3658.57	7290.27	26.8701	0.00368574	-8.08383	0.0082309	0.706668	Down	141.156	0.259498	2326	gi|494879550|gb|AGL39540.1|serine proteinase inhibitor [Litopenaeus vannamei]	1e-103	sp|P30740|ILEU_HUMAN	7e-47	Leukocyte elastase inhibitor OS=Homo sapiens GN=SERPINB1 PE=1 SV=1	KOG2392	2e-47	Serpin	ko05146	Amoebiasis	1	K13963	SERPINB	serpin B	GO:0005737;GO:0070062;GO:0005615;GO:0016020;GO:0004867;GO:0010951	cytoplasm|extracellular exosome|extracellular space|membrane|serine-type endopeptidase inhibitor activity|negative regulation of endopeptidase activity
comp121251_c0_seq2	88.3883	0	176.777	Inf	Inf	0.0420938	1	Up	0	7.34571	553
comp121253_c0_seq6	459.619	0	919.239	Inf	Inf	0.00188563	0.378845	Up	0	37.6995	562
comp121267_c0_seq1	3192.59	14.1421	6371.03	450.5	8.81538	0.00446941	0.527416	Up	0.700633	161.216	911
comp121268_c0_seq3	4062.68	7.77817	8117.59	1043.64	10.0274	0.00242773	0.406158	Up	0.181282	95.132	1967	gi|936600538|ref|XP_014213906.1|PREDICTED: epoxide hydrolase 4-like isoform X2 [Copidosoma floridanum]	7e-56	sp|Q8IUS5|EPHX4_HUMAN	3e-42	Epoxide hydrolase 4 OS=Homo sapiens GN=EPHX4 PE=2 SV=2	KOG4178	3e-36	Soluble epoxide hydrolase							GO:0016021;GO:0004301;GO:0044255	integral component of membrane|epoxide hydrolase activity|cellular lipid metabolic process
comp121269_c0_seq1	887.419	1.41421	1773.42	1254	10.2923	0.00186024	0.378845	Up	0.0434404	36.4368	1122
comp121287_c0_seq1	32385.8	12.0208	64759.7	5387.29	12.3953	0.0462884	1	Up	0.202441	554.155	2694	gi|224922687|dbj|BAH28836.1|elongation factor 1-alpha [Marsupenaeus japonicus]	0	sp|Q92005|EF1A_DANRE	0	Elongation factor 1-alpha OS=Danio rerio GN=eef1a PE=2 SV=1	KOG0052	0	Translation elongation factor EF-1 alpha/Tu	ko03013;ko05134	RNA transport|Legionellosis	2	K03231	EEF1A	elongation factor 1-alpha	GO:0005737;GO:0005622;GO:0005525;GO:0003924;GO:0003746;GO:0006414	cytoplasm|intracellular|GTP binding|GTPase activity|translation elongation factor activity|translational elongation
comp121309_c0_seq3	1489.87	1.41421	2978.33	2106	11.0403	0.000960746	0.33299	Up	0.0335839	45.5249	1508
comp121334_c0_seq1	80.6102	0	161.22	Inf	Inf	0.0471834	1	Up	0	10.3331	360
comp121352_c1_seq2	220.617	0	441.235	Inf	Inf	0.00913144	0.753209	Up	0	9.50137	1072
comp121396_c2_seq2	167.231	2.12132	332.34	156.667	7.29155	0.0478378	1	Up	0.108393	9.29338	824
comp121397_c1_seq2	4494.72	6.36396	8983.08	1411.56	10.4631	0.00205585	0.383847	Up	0.190166	132.829	1559
comp121404_c0_seq3	118.44	0.707107	236.174	334	8.3837	0.0470722	1	Up	0.0554264	7.57619	718
comp121407_c0_seq2	189.151	0.707107	377.595	534	9.0607	0.022332	1	Up	0.0191104	4.6593	1869	gi|585710448|ref|XP_006824549.1|PREDICTED: ammonium transporter Rh type B-like [Saccoglossus kowalevskii]	3e-39	sp|Q6DCG4|RHBGB_XENLA	3e-26	Ammonium transporter Rh type B-B OS=Xenopus laevis GN=rhbg-b PE=2 SV=1	KOG3796	4e-28	Ammonium transporter RHBG							GO:0016323;GO:0030659;GO:0016021;GO:0008519	basolateral plasma membrane|cytoplasmic vesicle membrane|integral component of membrane|ammonium transmembrane transporter activity
comp121411_c0_seq1	130.815	0	261.63	Inf	Inf	0.0240341	1	Up	0	4.60149	1308
comp121429_c0_seq1	82.0244	0	164.049	Inf	Inf	0.0462019	1	Up	0	3.54714	1068
comp121430_c0_seq1	83.4386	0	166.877	Inf	Inf	0.0452464	1	Up	0	4.60494	836
comp121431_c0_seq3	354.614	2.12132	707.107	333.333	8.38082	0.0121613	0.877973	Up	0.072404	13.0516	1250	gi|675371015|gb|KFM63917.1|hypothetical protein X975_11963, partial [Stegodyphus mimosarum]	8e-27
comp121460_c0_seq1	485.075	2.82843	967.322	342	8.41785	0.00844449	0.720462	Up	0.0973343	16.5257	1350	gi|1022778198|gb|KZS21692.1|Methyltransferase 7A-like protein [Daphnia magna]	3e-33	sp|Q9H8H3|MET7A_HUMAN	3e-34	Methyltransferase-like protein 7A OS=Homo sapiens GN=METTL7A PE=1 SV=1	KOG4300	7e-35	Predicted methyltransferase							GO:0005783;GO:0070062;GO:0005811;GO:0016020;GO:0008757;GO:0032259	endoplasmic reticulum|extracellular exosome|lipid particle|membrane|S-adenosylmethionine-dependent methyltransferase activity|methylation
comp121463_c0_seq1	2489.72	0	4979.45	Inf	Inf	0.000202072	0.33299	Up	0	76.9838	1491
comp121471_c0_seq3	145.664	0	291.328	Inf	Inf	0.0202296	1	Up	0	12.0515	558
comp121477_c1_seq3	247.134	0.707107	493.561	698	9.44708	0.0132574	0.921595	Up	0.0417037	10.0429	1132
comp121491_c1_seq1	2663.67	5327.34	0	0	#NAME?	0.000408154	0.33299	Down	85.1649	0	2817
comp121499_c1_seq1	115.258	0	230.517	Inf	Inf	0.0291194	1	Up	0	5.2368	1016
comp121500_c0_seq1	398.101	7.07107	789.131	111.6	6.80219	0.0257976	1	Up	0.400608	21.9084	830
comp121505_c0_seq1	683.772	1357.65	9.89949	0.00729167	-7.09954	0.0158965	1	Down	31.4154	0.115726	1946	gi|1005947294|ref|XP_015781958.1|PREDICTED: protein SpAN-like [Tetranychus urticae]	4e-31	sp|P98068|SPAN_STRPU	1e-22	Protein SpAN OS=Strongylocentrotus purpuratus GN=SPAN PE=2 SV=1	KOG3714	4e-17	Meprin A metalloprotease							GO:0004222;GO:0008270;GO:0007275	metalloendopeptidase activity|zinc ion binding|multicellular organismal development
comp121507_c0_seq2	151.321	0	302.642	Inf	Inf	0.0189786	1	Up	0	9.49864	734
comp121511_c0_seq1	293.449	0	586.899	Inf	Inf	0.00494374	0.547995	Up	0	6.56205	2063
comp121530_c0_seq1	115.966	0	231.931	Inf	Inf	0.0288568	1	Up	0	7.88412	680
comp121545_c0_seq1	20937.1	41861.4	12.7279	0.000304049	-11.6834	0.0204548	1	Down	869.17	0.131381	2169	gi|817053571|ref|XP_012262720.1|PREDICTED: vigilin [Athalia rosae]	1e-09				KOG2208	2e-07	Vigilin
comp121549_c0_seq1	95.4594	0	190.919	Inf	Inf	0.0380515	1	Up	0	3.69931	1188
comp121557_c0_seq1	17174.9	34342.8	7.07107	0.000205897	-12.2458	0.0110862	0.834537	Down	854.486	0.0966244	1810	gi|829198023|ref|XP_001027011.2|Serine/Threonine kinase domain protein [Tetrahymena thermophila SB210]	5e-06	sp|Q55GV3|PAKC_DICDI	5e-07	Serine/threonine-protein kinase pakC OS=Dictyostelium discoideum GN=pakC PE=1 SV=2	KOG0665	5e-07	Jun-N-terminal kinase (JNK)							GO:0005737;GO:0016020;GO:0005524;GO:0046872;GO:0004674;GO:0048365;GO:0030036;GO:0032147;GO:0016477;GO:0006935;GO:0007163;GO:0000281;GO:0031273;GO:0042981;GO:0043408;GO:0007346;GO:0007266;GO:0023014;GO:0031098	cytoplasm|membrane|ATP binding|metal ion binding|protein serine/threonine kinase activity|Rac GTPase binding|actin cytoskeleton organization|activation of protein kinase activity|cell migration|chemotaxis|establishment or maintenance of cell polarity|mitotic cytokinesis|negative regulation of pseudopodium assembly|regulation of apoptotic process|regulation of MAPK cascade|regulation of mitotic ce…
comp121584_c0_seq1	89.8026	0	179.605	Inf	Inf	0.0412442	1	Up	0	4.06542	1015
comp121603_c0_seq4	233.345	0	466.69	Inf	Inf	0.00810811	0.704024	Up	0	7.91346	1360
comp121636_c0_seq1	381.131	2.82843	759.433	268.5	8.06878	0.0131117	0.917743	Up	0.234675	32.6336	536
comp121636_c1_seq2	248.194	5.65685	490.732	86.75	6.43879	0.0480551	1	Up	0.542898	24.6115	460
comp121660_c0_seq1	355.321	9.19239	701.45	76.3077	6.25376	0.0391839	1	Up	0.249568	9.71512	1664	gi|478486836|gb|AGJ03550.1|cathepsin L [Palaemon carinicauda]	3e-140	sp|P25782|CYSP2_HOMAM	4e-121	Digestive cysteine proteinase 2 OS=Homarus americanus GN=LCP2 PE=2 SV=1	KOG1543	8e-99	Cysteine proteinase Cathepsin L	ko04210;ko04140;ko04142;ko04145;ko05205;ko05418;ko05323;ko04612	Apoptosis|Autophagy - animal|Lysosome|Phagosome|Proteoglycans in cancer|Fluid shear stress and atherosclerosis|Rheumatoid arthritis|Antigen processing and presentation	8	K01365	CTSL	cathepsin L	GO:0008234	cysteine-type peptidase activity
comp121664_c0_seq6	1415.98	0.707107	2831.26	4004	11.9672	0.000656799	0.33299	Up	0.0301583	56.0847	1164
comp121670_c0_seq3	1427.65	0	2855.3	Inf	Inf	0.000311178	0.33299	Up	0	175.024	376
comp121700_c0_seq1	4964.95	9929.9	0	0	#NAME?	0.000445037	0.33299	Down	255.833	0	1748	gi|646704087|gb|KDR12442.1|Ribosome-binding protein 1 [Zootermopsis nevadensis]	3e-06
comp121712_c0_seq1	177.484	0	354.968	Inf	Inf	0.014221	0.95702	Up	0	11.2401	727
comp121716_c0_seq2	108.187	0	216.375	Inf	Inf	0.0319443	1	Up	0	5.29416	942
comp121729_c0_seq2	607.051	1212.69	1.41421	0.00116618	-9.74399	0.00454575	0.531523	Down	83.2423	0.042358	656
comp121732_c0_seq2	1268.2	4.94975	2531.44	511.429	8.99839	0.00332651	0.463059	Up	0.480615	123.389	473
comp121737_c0_seq5	1436.13	0	2872.27	Inf	Inf	0.000309159	0.33299	Up	0	40.9813	1616
comp121742_c1_seq1	12561.8	16.9706	25106.5	1479.42	10.5308	0.0111151	0.83588	Up	0.491361	378.535	1529	gi|158830131|gb|ABW81469.1|tetraspanins-like protein CD63 [Fenneropenaeus chinensis]	4e-59	sp|P28648|CD63_RAT	8e-24	CD63 antigen OS=Rattus norvegicus GN=Cd63 PE=1 SV=2	KOG3882	2e-23	Tetraspanin family integral membrane protein	ko04142;ko05205	Lysosome|Proteoglycans in cancer	2	K06497	CD63, MLA1, TSPAN30	CD63 antigen	GO:0005737;GO:0012505;GO:0016021;GO:0005887;GO:0031226;GO:0031902;GO:0005765;GO:0005764;GO:0042470;GO:0097487;GO:0005886;GO:0043234;GO:0030658;GO:0032403;GO:0016477;GO:0007166;GO:0007160;GO:0035646;GO:0030855;GO:0010633;GO:0048757;GO:0045785;GO:0045807;GO:2001046;GO:0002092;GO:0015031;GO:1900746	cytoplasm|endomembrane system|integral component of membrane|integral component of plasma membrane|intrinsic component of plasma membrane|late endosome membrane|lysosomal membrane|lysosome|melanosome|multivesicular body, internal vesicle|plasma membrane|protein complex|transport vesicle membrane|protein complex binding|cell migration|cell surface receptor signaling pathway|cell-matrix adhesion|en…
comp121743_c0_seq1	27260	54507.3	12.7279	0.000233508	-12.0642	0.0338889	1	Down	1497.7	0.177138	1639
comp121751_c0_seq1	140.007	0	280.014	Inf	Inf	0.0215819	1	Up	0	6.57773	983
comp121769_c0_seq1	1173.8	2347.59	0	0	#NAME?	0.00082734	0.33299	Down	47.4991	0	2226	gi|154418773|ref|XP_001582404.1|viral A-type inclusion protein [Trichomonas vaginalis G3]	2e-16
comp121770_c0_seq16	100.409	0	200.818	Inf	Inf	0.0355078	1	Up	0	4.63277	999
comp121777_c0_seq2	129.401	0	258.801	Inf	Inf	0.0244433	1	Up	0	9.60561	621
comp121795_c0_seq2	367.696	8.48528	726.906	85.6667	6.42066	0.0345431	1	Up	0.153684	6.66851	2513
comp121801_c0_seq2	78.4889	0	156.978	Inf	Inf	0.048707	1	Up	0	2.94737	1232
comp121819_c0_seq3	1695.29	3.53553	3387.04	958	9.90388	0.00178336	0.377652	Up	0.127777	58.7121	1330
comp121834_c0_seq1	491.086	13.435	968.736	72.1053	6.17203	0.0329633	1	Up	0.184195	6.93912	3220	gi|999967495|gb|KXJ06669.1|Retrovirus-related Pol polyprotein from transposon 17.6 [Exaiptasia pallida]	6e-127	sp|P04323|POL3_DROME	2e-86	Retrovirus-related Pol polyprotein from transposon 17.6 OS=Drosophila melanogaster GN=pol PE=3 SV=1	KOG0017	4e-89	FOG: Transposon-encoded proteins with TYA, reverse transcriptase, integrase domains in various combinations							GO:0004190;GO:0004519;GO:0003676;GO:0003964;GO:0015074	aspartic-type endopeptidase activity|endonuclease activity|nucleic acid binding|RNA-directed DNA polymerase activity|DNA integration
comp121856_c0_seq1	25047.5	50082.3	12.7279	0.00025414	-11.9421	0.0285151	1	Down	2061.65	0.263738	1094
comp121867_c0_seq1	1334.66	3.53553	2665.79	754	9.55842	0.00229484	0.404554	Up	0.0966903	35.962	1709
comp121882_c0_seq1	352.846	4.24264	701.45	165.333	7.36923	0.0207561	1	Up	0.233954	18.5734	870
comp121885_c1_seq8	341.533	683.065	0	0	#NAME?	0.00670007	0.642902	Down	14.4162	0	2133
comp121898_c0_seq4	510.885	1018.94	2.82843	0.00277585	-8.49285	0.00919276	0.755866	Down	18.8696	0.0289499	2432	gi|1168684|sp|P42674.1|BP10_PARLIRecName: Full=Blastula protease 10; Flags: Precursor	1e-32	sp|P42674|BP10_PARLI	8e-34	Blastula protease 10 OS=Paracentrotus lividus GN=BP10 PE=2 SV=1	KOG3714	2e-25	Meprin A metalloprotease							GO:0005938;GO:0005615;GO:0048471;GO:0004222;GO:0008270	cell cortex|extracellular space|perinuclear region of cytoplasm|metalloendopeptidase activity|zinc ion binding
comp121905_c0_seq1	126.572	0	253.144	Inf	Inf	0.0252905	1	Up	0	7.04407	830	gi|780114307|ref|XP_011676983.1|PREDICTED: uncharacterized protein LOC105444432 [Strongylocentrotus purpuratus]	1e-08
comp121915_c0_seq1	456.791	1.41421	912.168	645	9.33316	0.00567418	0.586802	Up	0.0585194	25.3534	829
comp121926_c0_seq1	941.159	0	1882.32	Inf	Inf	0.000534325	0.33299	Up	0	54.2244	800
comp121937_c0_seq1	306.531	3.53553	609.526	172.4	7.42962	0.0232602	1	Up	0.114288	9.562	1468
comp121938_c0_seq1	505.581	994.192	16.9706	0.0170697	-5.87242	0.0407872	1	Down	17.7578	0.153605	2521
comp121944_c1_seq3	473.054	0	946.109	Inf	Inf	0.00177821	0.377652	Up	0	14.7294	1481
comp121953_c0_seq1	586.899	1.41421	1172.38	829	9.69523	0.00359984	0.479993	Up	0.0847901	41.7232	648
comp121990_c0_seq2	1211.63	13.435	2409.82	179.368	7.48678	0.00948057	0.767701	Up	0.681731	61.2313	907			sp|Q22544|YAE7_CAEEL	2e-06	Uncharacterized protein T18D3.7 OS=Caenorhabditis elegans GN=T18D3.7 PE=3 SV=2										GO:0003700	transcription factor activity, sequence-specific DNA binding
comp122010_c0_seq1	111.723	0	223.446	Inf	Inf	0.0304854	1	Up	0	16.1342	319
comp122019_c0_seq1	1512.85	3025.71	0	0	#NAME?	0.000616388	0.33299	Down	64.1563	0	2124	gi|685828850|emb|CEF63772.1|Kinesin-like protein KIF21B [Strongyloides ratti]	2e-09
comp122027_c1_seq1	723.37	4.24264	1442.5	340	8.40939	0.00619337	0.612901	Up	0.159001	25.6471	1296
comp122033_c1_seq4	1155.41	8.48528	2302.34	271.333	8.08392	0.00629818	0.618267	Up	1.00426	138.256	384
comp122038_c0_seq2	10148.4	20294	2.82843	0.000139373	-12.8088	0.00293481	0.432821	Down	484.849	0.0421221	1885	gi|123487986|ref|XP_001325066.1|hypothetical protein [Trichomonas vaginalis G3]	1e-07
comp122079_c0_seq1	145.664	0	291.328	Inf	Inf	0.0202296	1	Up	0	10.7618	623
comp122081_c1_seq5	1721.81	0	3443.61	Inf	Inf	0.000257917	0.33299	Up	0	34.1897	2322	gi|646722569|gb|KDR23527.1|SET and MYND domain-containing protein 4 [Zootermopsis nevadensis]	6e-52	sp|Q5F3V0|SMYD4_CHICK	3e-20	SET and MYND domain-containing protein 4 OS=Gallus gallus GN=SMYD4 PE=2 SV=1	KOG2084	2e-26	Predicted histone tail methylase containing SET domain							GO:0046872;GO:0008168	metal ion binding|methyltransferase activity
comp122084_c0_seq6	104.652	0	209.304	Inf	Inf	0.0335014	1	Up	0	6.58175	732
comp122084_c1_seq1	295.571	0	591.141	Inf	Inf	0.0048662	0.547815	Up	0	41.9339	325
comp122105_c1_seq1	142.482	284.964	0	0	#NAME?	0.0345308	1	Down	12.51	0	1026
comp122133_c0_seq1	329.158	2.12132	656.195	309.333	8.27302	0.0140352	0.950269	Up	0.0751395	11.6911	1293
comp122135_c0_seq1	526.087	5.65685	1046.52	185	7.53138	0.013262	0.921595	Up	0.163445	15.5672	1550
comp122144_c0_seq1	1792.16	20.5061	3563.82	173.793	7.44123	0.00967226	0.770982	Up	0.568987	50.6867	1621
comp122153_c0_seq1	164.756	1.41421	328.098	232	7.85798	0.0392164	1	Up	0.0500884	4.76779	1585
comp122154_c0_seq1	2370.93	1.41421	4740.44	3352	11.7108	0.000656822	0.33299	Up	0.0356323	60.1071	1818
comp122163_c0_seq1	128.34	256.68	0	0	#NAME?	0.0402227	1	Down	5.14138	0	2249	gi|196008615|ref|XP_002114173.1|hypothetical protein TRIADDRAFT_58362 [Trichoplax adhaerens]	2e-81	sp|P08659|LUCI_PHOPY	1e-75	Luciferin 4-monooxygenase OS=Photinus pyralis PE=1 SV=1	KOG1176	2e-71	Acyl-CoA synthetase
comp122176_c1_seq1	1926.51	3844.54	8.48528	0.0022071	-8.82363	0.00394432	0.50224	Down	73.6499	0.0898557	2351	gi|684389714|ref|XP_009169463.1|hypothetical protein T265_13931 [Opisthorchis viverrini]	3e-10	sp|A8MYU2|KCNU1_HUMAN	2e-08	Potassium channel subfamily U member 1 OS=Homo sapiens GN=KCNU1 PE=1 SV=2	KOG1420	2e-08	Ca2+-activated K+ channel Slowpoke, alpha subunit	ko04022;ko04270;ko04970;ko04972;ko04911;ko04924	cGMP - PKG signaling pathway|Vascular smooth muscle contraction|Salivary secretion|Pancreatic secretion|Insulin secretion|Renin secretion	6	K04936	KCNMA1	potassium large conductance calcium-activated channel subfamily M alpha member 1	GO:0005886;GO:0008076;GO:0060072;GO:0005267;GO:0005249;GO:0032504;GO:0007338;GO:0035036	plasma membrane|voltage-gated potassium channel complex|large conductance calcium-activated potassium channel activity|potassium channel activity|voltage-gated potassium channel activity|multicellular organism reproduction|single fertilization|sperm-egg recognition
comp122193_c0_seq1	1644.02	1.41421	3286.63	2324	11.1824	0.000869405	0.33299	Up	0.0603557	68.8831	1100
comp122208_c0_seq1	8905.66	0.707107	17810.6	25188	14.6204	0.000982928	0.33299	Up	0.0192499	187.646	2188
comp122215_c0_seq1	154.856	0	309.713	Inf	Inf	0.0182428	1	Up	0	8.59706	830
comp122216_c0_seq1	248.902	0	497.803	Inf	Inf	0.00706873	0.661287	Up	0	10.552	1089
comp122219_c0_seq4	1825.4	4.94975	3645.84	736.571	9.52468	0.00227387	0.401792	Up	0.174928	70.9782	1184
comp122225_c2_seq1	193.747	0	387.495	Inf	Inf	0.0119575	0.87156	Up	0	18.7462	476
comp122234_c0_seq3	6833.13	53.033	13613.2	256.693	8.0039	0.0157807	1	Up	1.19411	156.125	2010	gi|341874535|gb|EGT30470.1|hypothetical protein CAEBREN_22499 [Caenorhabditis brenneri]	1e-07	sp|D3ZQG6|TRIM2_RAT	1e-05	Tripartite motif-containing protein 2 OS=Rattus norvegicus GN=Trim2 PE=1 SV=2	KOG2177	2e-07	Predicted E3 ubiquitin ligase							GO:0005737;GO:0016874;GO:0004842;GO:0008270;GO:0043523	cytoplasm|ligase activity|ubiquitin-protein transferase activity|zinc ion binding|regulation of neuron apoptotic process
comp122237_c0_seq1	277.186	0	554.372	Inf	Inf	0.00560088	0.582944	Up	0	15.2106	841
comp122242_c0_seq8	125.865	0	251.73	Inf	Inf	0.0255085	1	Up	0	8.21025	705
comp122251_c0_seq1	329.512	0	659.024	Inf	Inf	0.00383258	0.494932	Up	0	19.1511	794
comp122265_c0_seq1	4334.21	62.9325	8605.49	136.742	7.09531	0.0178198	1	Up	1.82066	127.413	1557	gi|1022760815|gb|KZS06865.1|Synaptic vesicle membrane protein VAT-1 [Daphnia magna]	6e-78	sp|Q8JFV8|VAT1_DANRE	9e-77	Synaptic vesicle membrane protein VAT-1 homolog OS=Danio rerio GN=vat1 PE=2 SV=1	KOG1197	7e-73	Predicted quinone oxidoreductase							GO:0048037;GO:0016491;GO:0008270	cofactor binding|oxidoreductase activity|zinc ion binding
comp122294_c0_seq2	168.999	0	337.997	Inf	Inf	0.0156011	1	Up	0	23.0301	338
comp122355_c1_seq1	201.172	402.344	0	0	#NAME?	0.019194	1	Down	14.2649	0	1270
comp122364_c0_seq1	1434.37	0.707107	2868.03	4056	11.9858	0.000647526	0.33299	Up	0.0332583	46.0467	1436
comp122367_c0_seq1	2073.94	21.2132	4126.68	194.533	7.60387	0.00879368	0.740662	Up	1.29373	128.193	742
comp122372_c0_seq2	1270.32	2.12132	2538.51	1196.67	10.2248	0.0015689	0.364188	Up	0.0833774	50.4856	1159
comp122381_c0_seq1	278.954	553.665	4.24264	0.00766284	-7.02791	0.0352798	1	Down	15.0616	0.0552773	1656
comp122403_c0_seq1	2266.63	4529.02	4.24264	0.000936768	-10.06	0.00190971	0.378845	Down	156.177	0.0772248	1306
comp122413_c0_seq1	153.442	0	306.884	Inf	Inf	0.0185331	1	Up	0	5.18093	1368
comp122468_c0_seq2	1265.72	0	2531.44	Inf	Inf	0.000357868	0.33299	Up	0	45.1344	1293
comp122479_c2_seq3	20739.4	41466.2	12.7279	0.000306947	-11.6697	0.0201437	1	Down	1152.73	0.18425	1620	gi|260791480|ref|XP_002590757.1|hypothetical protein BRAFLDRAFT_78173 [Branchiostoma floridae]	1e-10
comp122504_c0_seq1	1163.9	2289.61	38.1838	0.016677	-5.906	0.0300684	1	Down	55.6111	0.474419	1854	gi|1022771355|gb|KZS15693.1|Alpha-ketoglutarate-dependent hypophosphite dioxygenase [Daphnia magna]	2e-85	sp|P57093|PAHX_RAT	3e-19	Phytanoyl-CoA dioxygenase, peroxisomal OS=Rattus norvegicus GN=Phyh PE=1 SV=2	KOG3290	4e-19	Peroxisomal phytanoyl-CoA hydroxylase							GO:0005739;GO:0005782;GO:0005777;GO:0048037;GO:0031418;GO:0046872;GO:0048244;GO:0001561;GO:0006720;GO:0097089	mitochondrion|peroxisomal matrix|peroxisome|cofactor binding|L-ascorbic acid binding|metal ion binding|phytanoyl-CoA dioxygenase activity|fatty acid alpha-oxidation|isoprenoid metabolic process|methyl-branched fatty acid metabolic process
comp122509_c0_seq1	3193.65	7.77817	6379.52	820.182	9.6798	0.00250208	0.410115	Up	0.115063	49.9933	2942
comp122509_c1_seq1	934.795	7.07107	1862.52	263.4	8.04111	0.00691894	0.654786	Up	0.0826146	10.6794	4019	gi|242017448|ref|XP_002429200.1|male sterility domain-containing protein, putative [Pediculus humanus corporis]	8e-108	sp|A1ZAI5|FACR1_DROME	3e-115	Putative fatty acyl-CoA reductase CG5065 OS=Drosophila melanogaster GN=CG5065 PE=3 SV=1	KOG1221	8e-116	Acyl-CoA reductase	ko04146;ko00073;ko04212	Peroxisome|Cutin, suberine and wax biosynthesis|Longevity regulating pathway - worm	3	K13356	FAR	alcohol-forming fatty acyl-CoA reductase	GO:0016021;GO:0005778;GO:0005777;GO:0080019;GO:0050062;GO:0008611;GO:0035336;GO:0010025	integral component of membrane|peroxisomal membrane|peroxisome|fatty-acyl-CoA reductase (alcohol-forming) activity|long-chain-fatty-acyl-CoA reductase activity|ether lipid biosynthetic process|long-chain fatty-acyl-CoA metabolic process|wax biosynthetic process
comp122511_c0_seq1	1520.99	14.1421	3027.83	214.1	7.74214	0.0077415	0.690265	Up	0.807588	87.9068	794
comp122521_c0_seq1	4509.57	3.53553	9015.61	2550	11.3163	0.00124672	0.34072	Up	0.254983	344.116	604
comp122523_c0_seq1	153.442	0	306.884	Inf	Inf	0.0185331	1	Up	0	7.77638	910
comp122529_c0_seq6	95.4594	0	190.919	Inf	Inf	0.0380515	1	Up	0	5.64871	778
comp122584_c1_seq1	262.337	0	524.673	Inf	Inf	0.00631284	0.618267	Up	0	36.8444	328
comp122584_c3_seq1	3191.17	1.41421	6380.93	4512	12.1396	0.000595949	0.33299	Up	0.0846483	235.759	624
comp122589_c0_seq1	1021.42	3.53553	2039.3	576.8	9.17193	0.0032035	0.451371	Up	0.148319	44.0873	1066
comp122592_c1_seq7	350.725	4.24264	697.207	164.333	7.36048	0.0209828	1	Up	0.455226	35.8626	448
comp122603_c0_seq2	1166.02	25.4558	2306.58	90.6111	6.50162	0.0193064	1	Up	0.388922	18.1926	2923	gi|1009556516|ref|XP_015913491.1|PREDICTED: uncharacterized protein LOC107443976 [Parasteatoda tepidariorum]	1e-64
comp122637_c0_seq1	10347.1	0	20694.2	Inf	Inf	0.000748887	0.33299	Up	0	317.196	1504
comp122643_c0_seq8	468.812	12.7279	924.896	72.6667	6.18322	0.0336638	1	Up	0.282627	10.6164	2007
comp122645_c0_seq1	15379.2	2.12132	30756.3	14498.7	13.8236	0.00454709	0.531523	Up	0.0862914	627.462	1130
comp122658_c0_seq6	645.942	2.12132	1289.76	608	9.24793	0.00412667	0.505589	Up	0.093364	32.9011	904
comp122660_c1_seq3	3685.09	2.12132	7368.05	3473.33	11.7621	0.000797743	0.33299	Up	0.0511684	94.5732	1796
comp122666_c0_seq3	19535.6	4.94975	39066.2	7892.57	12.9463	0.0109299	0.827092	Up	0.122299	504.251	1786
comp122688_c0_seq7	3413.2	1.41421	6824.99	4826	12.2366	0.000593486	0.33299	Up	0.0893026	190.946	824
comp122701_c0_seq1	10155.5	130.108	20180.8	155.109	7.27714	0.0397214	1	Up	2.73539	216.982	2144
comp122721_c0_seq2	336.583	0	673.166	Inf	Inf	0.00365836	0.480273	Up	0	19.1521	811
comp122737_c0_seq2	663.973	1.41421	1326.53	938	9.87344	0.00292717	0.432821	Up	0.0578838	31.9687	957
comp122759_c0_seq1	216.375	0	432.749	Inf	Inf	0.00951316	0.767701	Up	0	16.0623	621	gi|83282363|ref|XP_729737.1|hypothetical protein [Plasmodium yoelii yoelii 17XNL]	2e-08
comp122765_c0_seq5	86.267	0	172.534	Inf	Inf	0.0434098	1	Up	0	3.09059	1283
comp122767_c0_seq2	408.354	9.19239	807.516	87.8462	6.45691	0.0311719	1	Up	0.224376	10.4589	1781
comp122775_c0_seq2	318.905	0	637.81	Inf	Inf	0.00411797	0.505589	Up	0	18.1413	811
comp122777_c0_seq1	3088.64	41.0122	6136.27	149.621	7.22517	0.0132527	0.921595	Up	1.67894	128.373	1102
comp122803_c0_seq1	4040.05	7.77817	8072.33	1037.82	10.0193	0.0024272	0.406158	Up	0.0895124	48.2387	3858
comp122809_c0_seq1	171.473	0.707107	342.24	484	8.91886	0.0266629	1	Up	0.0220739	5.43977	1448	gi|732664732|gb|AIZ77505.1|legumain-protease-precursor [Platynereis dumerilii]	7e-94	sp|Q9R0J8|LGMN_RAT	1e-103	Legumain OS=Rattus norvegicus GN=Lgmn PE=1 SV=1	KOG1348	3e-102	Asparaginyl peptidases	ko04142;ko04612	Lysosome|Antigen processing and presentation	2	K01369	LGMN	legumain	GO:0043202;GO:0005764;GO:0004197;GO:1901185;GO:0006508;GO:0051603;GO:0032801;GO:0003014;GO:0006624	lysosomal lumen|lysosome|cysteine-type endopeptidase activity|negative regulation of ERBB signaling pathway|proteolysis|proteolysis involved in cellular protein catabolic process|receptor catabolic process|renal system process|vacuolar protein processing
comp122818_c0_seq1	16403.5	2.82843	32804.1	11598	13.5016	0.00597687	0.605567	Up	0.0995279	547.602	1381
comp122832_c0_seq1	244.659	1.41421	487.904	345	8.43045	0.0192349	1	Up	0.0560449	10.4266	1078
comp122837_c0_seq1	80.6102	0	161.22	Inf	Inf	0.0471834	1	Up	0	2.99187	1237
comp122850_c0_seq1	615.536	4.94975	1226.12	247.714	7.95253	0.00913012	0.753209	Up	0.170758	22.2721	1269
comp122854_c0_seq1	1789.69	0	3579.37	Inf	Inf	0.000249329	0.33299	Up	0	75.9192	1087
comp122855_c1_seq1	2538.87	21.9203	5055.81	230.645	7.84953	0.00781848	0.690265	Up	0.463047	54.9978	2119
comp122863_c1_seq1	997.728	0	1995.46	Inf	Inf	0.000490789	0.33299	Up	0	44.0202	1045
comp122871_c0_seq2	151.321	1.41421	301.227	213	7.73471	0.0447667	1	Up	0.102284	11.0269	631
comp122873_c0_seq3	286.378	0	572.756	Inf	Inf	0.00521528	0.561942	Up	0	12.5617	1051
comp122874_c0_seq1	77.0746	0	154.149	Inf	Inf	0.0497587	1	Up	0	4.23154	843
comp122911_c0_seq3	1119.7	51.6188	2187.79	42.3836	5.40543	0.0426994	1	Up	0.773075	16.8758	2989	gi|1022772651|gb|KZS16808.1|Uncharacterized protein APZ42_017385 [Daphnia magna]	3e-37	sp|Q5ZLK5|P4HA2_CHICK	3e-23	Prolyl 4-hydroxylase subunit alpha-2 OS=Gallus gallus GN=P4HA2 PE=2 SV=1	KOG1591	2e-20	Prolyl 4-hydroxylase alpha subunit	ko00330	Arginine and proline metabolism	1	K00472	P4HA	prolyl 4-hydroxylase	GO:0005788;GO:0005506;GO:0031418;GO:0016702;GO:0004656	endoplasmic reticulum lumen|iron ion binding|L-ascorbic acid binding|oxidoreductase activity, acting on single donors with incorporation of molecular oxygen, incorporation of two atoms of oxygen|procollagen-proline 4-dioxygenase activity
comp122915_c0_seq1	702.157	0	1404.31	Inf	Inf	0.000853489	0.33299	Up	0	47.4492	682
comp122922_c0_seq1	3795.75	7585.84	5.65685	0.000745712	-10.3891	0.00200706	0.383232	Down	318.68	0.133093	1072	gi|262401375|gb|ACY66590.1|hypothetical protein [Scylla paramamosain]	6e-12
comp122942_c0_seq1	1188.29	2335.57	41.0122	0.0175598	-5.83158	0.0316173	1	Down	48.693	0.430284	2160	gi|761916940|ref|XP_011407445.1|PREDICTED: RING finger protein nhl-1-like [Amphimedon queenslandica]	1e-14	sp|Q86XT4|TRI50_HUMAN	2e-15	E3 ubiquitin-protein ligase TRIM50 OS=Homo sapiens GN=TRIM50 PE=1 SV=1	KOG2177	4e-16	Predicted E3 ubiquitin ligase							GO:0005737;GO:0016874;GO:0008270	cytoplasm|ligase activity|zinc ion binding
comp122970_c0_seq1	265.519	3.53553	527.502	149.2	7.2211	0.0301703	1	Up	0.0683973	5.17934	2349
comp122995_c0_seq1	266.579	0	533.159	Inf	Inf	0.0060972	0.610299	Up	0	22.6907	542
comp123005_c0_seq2	241.123	4.24264	478.004	112.667	6.81592	0.0407507	1	Up	0.321775	17.5634	628
comp123020_c0_seq1	441.235	2.82843	879.641	311	8.28077	0.0100137	0.788242	Up	0.139183	21.6694	936
comp123024_c0_seq7	845.7	21.2132	1670.19	78.7333	6.2989	0.0239056	1	Up	0.419267	16.7551	2297
comp123029_c0_seq1	214.96	0	429.921	Inf	Inf	0.00964529	0.770982	Up	0	11.0977	894
comp123030_c0_seq4	415.072	827.315	2.82843	0.0034188	-8.19229	0.0132525	0.921595	Down	21.1408	0.0290701	1763	gi|126143295|gb|ABN80093.1|5' nucleotidase [Glossina morsitans morsitans]	5e-15
comp123066_c0_seq1	16677.5	70.0036	33284.9	475.475	8.89322	0.0379507	1	Up	1.02506	250.184	3067	gi|646713331|gb|KDR17734.1|Beta-hexosaminidase subunit beta [Zootermopsis nevadensis]	1e-132	sp|Q0V8R6|HEXA_BOVIN	6e-138	Beta-hexosaminidase subunit alpha OS=Bos taurus GN=HEXA PE=2 SV=1	KOG2499	8e-134	Beta-N-acetylhexosaminidase	ko04142;ko00520;ko00511;ko00513;ko00531;ko00603;ko00604	Lysosome|Amino sugar and nucleotide sugar metabolism|Other glycan degradation|Various types of N-glycan biosynthesis|Glycosaminoglycan degradation|Glycosphingolipid biosynthesis - globo and isoglobo series|Glycosphingolipid biosynthesis - ganglio series	7	K12373	HEXA_B	hexosaminidase	GO:0005764;GO:0004563;GO:0007628;GO:0005975;GO:0048667;GO:0006689;GO:0030203;GO:0019915;GO:0007040;GO:0042552;GO:0050885;GO:0050884;GO:0007605;GO:0019953;GO:0001501;GO:0060395	lysosome|beta-N-acetylhexosaminidase activity|adult walking behavior|carbohydrate metabolic process|cell morphogenesis involved in neuron differentiation|ganglioside catabolic process|glycosaminoglycan metabolic process|lipid storage|lysosome organization|myelination|neuromuscular process controlling balance|neuromuscular process controlling posture|sensory perception of sound|sexual reproduction…
comp123069_c0_seq2	408.708	14.1421	803.273	56.8	5.82782	0.0459504	1	Up	0.601321	17.2599	1073
comp123084_c0_seq2	1233.55	3.53553	2463.56	696.8	9.4446	0.00251856	0.410115	Up	0.165212	59.7857	950
comp123086_c0_seq1	662.913	1325.83	0	0	#NAME?	0.00192644	0.378845	Down	26.6775	0	2238	gi|934151419|gb|KPM02240.1|calcium/calmodulin-dependent 3',5'-cyclic nucleotide phosphodiesterase 1C-like protein [Sarcoptes scabiei]	2e-87	sp|Q01063|PDE4D_MOUSE	8e-110	cAMP-specific 3',5'-cyclic phosphodiesterase 4D OS=Mus musculus GN=Pde4d PE=1 SV=2	KOG3689	1e-112	Cyclic nucleotide phosphodiesterase	ko04024;ko05032;ko00230	cAMP signaling pathway|Morphine addiction|Purine metabolism	3	K13293	PDE4	cAMP-specific phosphodiesterase 4	GO:0016324;GO:0034704;GO:0005813;GO:0005829;GO:0005794;GO:0030016;GO:0004115;GO:0051117;GO:0030552;GO:0008144;GO:0044325;GO:0046872;GO:0071875;GO:0007568;GO:0006198;GO:0043623;GO:0071320;GO:0071872;GO:0071222;GO:0061028;GO:0050900;GO:0030324;GO:0007613;GO:0035264;GO:0045822;GO:0033137;GO:1901898;GO:0030593;GO:0032729;GO:0032743;GO:0032754;GO:0014911;GO:0048661;GO:0030814;GO:0086004;GO:1901844;GO:…	apical plasma membrane|calcium channel complex|centrosome|cytosol|Golgi apparatus|myofibril|3',5'-cyclic-AMP phosphodiesterase activity|ATPase binding|cAMP binding|drug binding|ion channel binding|metal ion binding|adrenergic receptor signaling pathway|aging|cAMP catabolic process|cellular protein complex assembly|cellular response to cAMP|cellular response to epinephrine stimulus|cellular respon…
comp123130_c0_seq2	252.437	0	504.874	Inf	Inf	0.00685836	0.653011	Up	0	6.98637	1664	gi|478733534|gb|AGJ51192.1|olfactory ionotropic receptor IR7 [Panulirus argus]	6e-68	sp|Q9ULK0|GRID1_HUMAN	7e-19	Glutamate receptor ionotropic, delta-1 OS=Homo sapiens GN=GRID1 PE=2 SV=2	KOG1052	2e-19	Glutamate-gated kainate-type ion channel receptor subunit GluR5 and related subunits							GO:0030054;GO:0030425;GO:0070062;GO:0008328;GO:0005886;GO:0045211;GO:0005234;GO:0004970;GO:0034220;GO:0035235;GO:0035176;GO:0035249	cell junction|dendrite|extracellular exosome|ionotropic glutamate receptor complex|plasma membrane|postsynaptic membrane|extracellular-glutamate-gated ion channel activity|ionotropic glutamate receptor activity|ion transmembrane transport|ionotropic glutamate receptor signaling pathway|social behavior|synaptic transmission, glutamatergic
comp123153_c0_seq1	930.199	2.12132	1858.28	876	9.77479	0.0023606	0.406158	Up	0.0969153	43.6341	982
comp123160_c0_seq2	551.543	11.3137	1091.77	96.5	6.59246	0.0234279	1	Up	0.494564	24.0204	1048
comp123181_c0_seq1	127.279	0	254.558	Inf	Inf	0.025075	1	Up	0	2.85934	2053
comp123196_c0_seq1	173.948	0	347.897	Inf	Inf	0.0147784	0.979253	Up	0	6.06516	1322
comp123201_c0_seq4	173.241	346.482	0	0	#NAME?	0.0251983	1	Down	8.2855	0	1883	gi|310693525|gb|ADP05100.1|truncated cathepsin A [Eriocheir sinensis]	4e-95	sp|Q3MI05|PPGB_BOVIN	9e-79	Lysosomal protective protein OS=Bos taurus GN=CTSA PE=2 SV=1	KOG1282	4e-78	Serine carboxypeptidases (lysosomal cathepsin A)	ko04142;ko04614	Lysosome|Renin-angiotensin system	2	K13289	CTSA, CPY	cathepsin A (carboxypeptidase C)	GO:0005764;GO:0005739;GO:0004185	lysosome|mitochondrion|serine-type carboxypeptidase activity
comp123203_c0_seq2	1181.58	9.89949	2353.25	237.714	7.89308	0.007155	0.663083	Up	0.378303	44.5421	1218
comp123204_c0_seq1	236.174	0	472.347	Inf	Inf	0.00790338	0.693412	Up	0	12.5313	868
comp123211_c0_seq1	404.819	0.707107	808.93	1144	10.1599	0.00482611	0.546028	Up	0.0310455	15.918	1171
comp123212_c0_seq1	382.191	6.36396	758.018	119.111	6.89616	0.0252491	1	Up	0.0967135	6.03129	2897
comp123223_c0_seq2	114.551	0	229.103	Inf	Inf	0.0293855	1	Up	0	4.77046	1108
comp123227_c0_seq1	120.208	0	240.416	Inf	Inf	0.0273503	1	Up	0	6.30349	881
comp123233_c0_seq1	175.009	2.12132	347.897	164	7.35755	0.0444853	1	Up	0.116618	8.964	893
comp123240_c0_seq1	130.815	0	261.63	Inf	Inf	0.0240341	1	Up	0	9.51	635
comp123258_c0_seq6	599.627	0	1199.25	Inf	Inf	0.00112547	0.34072	Up	0	19.2714	1434
comp123288_c0_seq1	857.367	0.707107	1714.03	2424	11.2432	0.00127502	0.34072	Up	0.0605904	57.5251	687
comp123293_c0_seq1	281.428	560.029	2.82843	0.00505051	-7.62936	0.0268742	1	Down	12.2811	0.0268439	2053
comp123300_c0_seq2	137.179	274.357	0	0	#NAME?	0.0365325	1	Down	3.41093	0	3627
comp123313_c0_seq2	949.291	13.435	1885.15	140.316	7.13253	0.0128653	0.909334	Up	0.195006	14.2482	3051	gi|827746621|gb|AKK23338.1|knickkopf [Cherax quadricarinatus]	0	sp|Q9GPJ1|SKEL2_DROME	2e-97	Protein Skeletor, isoforms D/E OS=Drosophila melanogaster GN=Skeletor PE=1 SV=3	KOG4731	0	Protein predicted to be involved in spindle matrix formation, contains DM13, DoH, and DOMON domains							GO:0005737;GO:0005874;GO:0005730;GO:0005634;GO:0005700;GO:0005819;GO:0005198;GO:0051301;GO:0051321;GO:0007067;GO:0006997;GO:0051225	cytoplasm|microtubule|nucleolus|nucleus|polytene chromosome|spindle|structural molecule activity|cell division|meiotic cell cycle|mitotic nuclear division|nucleus organization|spindle assembly
comp123336_c0_seq2	84.8528	0	169.706	Inf	Inf	0.044316	1	Up	0	3.40874	1143
comp123341_c1_seq1	934.088	1863.93	4.24264	0.00227618	-8.77917	0.00489827	0.547995	Down	69.4431	0.0863752	1209
comp123342_c0_seq5	132.229	0	264.458	Inf	Inf	0.0236339	1	Up	0	3.91959	1554	gi|743692758|gb|AJC52502.1|estrogen sulfotransferase [Scylla olivacea]	4e-82	sp|O75897|ST1C4_HUMAN	5e-50	Sulfotransferase 1C4 OS=Homo sapiens GN=SULT1C4 PE=1 SV=2	KOG1584	1e-50	Sulfotransferase
comp123343_c0_seq2	475.176	950.352	0	0	#NAME?	0.00348716	0.472281	Down	18.7981	0	2276	gi|198437989|ref|XP_002128274.1|PREDICTED: protein O-linked-mannose beta-1,2-N-acetylglucosaminyltransferase 1 [Ciona intestinalis]	4e-14	sp|Q5RCB9|PMGT1_PONAB	9e-13	Protein O-linked-mannose beta-1,2-N-acetylglucosaminyltransferase 1 OS=Pongo abelii GN=POMGNT1 PE=2 SV=1				ko00515	Mannose type O-glycan biosyntheis	1	K09666	POMGNT1	beta-1,2-N-acetylglucosaminyltransferase	GO:0000139;GO:0016021;GO:0008375;GO:0006486	Golgi membrane|integral component of membrane|acetylglucosaminyltransferase activity|protein glycosylation
comp123346_c0_seq1	552.604	1088.24	16.9706	0.0155945	-6.00282	0.0357593	1	Down	9.24619	0.0739738	5302	gi|939239237|ref|XP_014262332.1|PREDICTED: epithelial chloride channel protein-like [Cimex lectularius]	5e-75	sp|P54281|ECLC_BOVIN	3e-68	Epithelial chloride channel protein OS=Bos taurus PE=2 SV=1										GO:0034707;GO:0005262;GO:0005254;GO:0005244	chloride channel complex|calcium channel activity|chloride channel activity|voltage-gated ion channel activity
comp123379_c0_seq2	15891.5	31776	7.07107	0.000222529	-12.1337	0.00972201	0.772854	Down	1182.67	0.129574	1210
comp123398_c0_seq1	774.635	2.12132	1547.15	729.333	9.51043	0.00309518	0.445609	Up	0.0915914	37.8504	942
comp123408_c0_seq4	1485.28	13.435	2957.12	220.105	7.78205	0.00752946	0.683549	Up	0.685987	75.8438	899
comp123410_c0_seq2	89.0955	0	178.191	Inf	Inf	0.0416663	1	Up	0	9.43959	434
comp123420_c0_seq2	323.148	0	646.296	Inf	Inf	0.00400016	0.504234	Up	0	12.9698	1149
comp123428_c2_seq10	824.133	0.707107	1647.56	2330	11.1861	0.00135476	0.342918	Up	0.0671253	56.3609	674
comp123440_c0_seq1	589.727	26.8701	1152.58	42.8947	5.42273	0.0494441	1	Up	0.720009	15.9245	1669
comp123475_c0_seq17	82.0244	0	164.049	Inf	Inf	0.0462019	1	Up	0	2.91736	1297
comp123494_c0_seq1	190.919	0	381.838	Inf	Inf	0.0123177	0.886732	Up	0	8.71433	1009
comp123499_c0_seq3	310.773	4.94975	616.597	124.571	6.96083	0.0294488	1	Up	0.172704	10.5294	1350
comp123519_c0_seq1	369.463	2.12132	736.805	347.333	8.44018	0.0112421	0.84043	Up	0.0842785	14.2445	1192
comp123525_c0_seq2	424.971	0	849.942	Inf	Inf	0.00221769	0.39931	Up	0	23.5115	834
comp123527_c1_seq2	514.42	3.53553	1025.3	290	8.17991	0.00914876	0.753818	Up	0.152609	23.0062	1028
comp123536_c0_seq14	684.479	2.82843	1366.13	483	8.91588	0.00474388	0.541981	Up	0.0691721	16.0728	1960
comp123541_c2_seq2	300.52	0	601.041	Inf	Inf	0.00469193	0.541981	Up	0	16.1318	858	gi|901880183|gb|KMZ92623.1|hypothetical protein PVMG_01211 [Plasmodium vivax Mauritania I]	6e-08
comp123564_c0_seq2	154.856	1.41421	308.299	218	7.76818	0.0432235	1	Up	0.0772929	8.08805	877
comp123611_c0_seq14	380.423	0	760.847	Inf	Inf	0.00280469	0.424365	Up	0	19.7067	890
comp123633_c0_seq1	1861.81	0	3723.62	Inf	Inf	0.000241294	0.33299	Up	0	110.066	780
comp123644_c0_seq1	216.728	0.707107	432.749	612	9.25739	0.0171968	1	Up	0.022567	5.76153	1730
comp123645_c0_seq1	120.208	0	240.416	Inf	Inf	0.0273503	1	Up	0	2.73484	2032
comp123646_c0_seq2	87.6812	0	175.362	Inf	Inf	0.0425268	1	Up	0	2.66001	1521
comp123661_c0_seq2	3572.66	24.7487	7120.57	287.714	8.16849	0.00749421	0.683549	Up	1.33513	194.272	845
comp123682_c0_seq2	246.073	1.41421	490.732	347	8.43879	0.0190247	1	Up	0.0608858	10.0416	1127	gi|817193157|ref|XP_012272033.1|PREDICTED: uncharacterized protein LOC105695238 [Orussus abietinus]	4e-30
comp123687_c0_seq1	545.179	1087.53	2.82843	0.00260078	-8.58684	0.00823159	0.706668	Down	44.1108	0.0575279	1110
comp123688_c0_seq1	3187.64	0	6375.27	Inf	Inf	0.000192388	0.33299	Up	0	117.661	1249
comp123691_c0_seq1	1168.14	0	2336.28	Inf	Inf	0.000395841	0.33299	Up	0	44.741	1204
comp123693_c0_seq3	737.866	6.36396	1469.37	230.889	7.85105	0.00874588	0.7391	Up	0.286562	34.2899	988
comp123715_c0_seq1	3034.2	1.41421	6066.98	4290	12.0668	0.000600481	0.33299	Up	0.0738036	136.598	1024
comp123730_c0_seq3	117.733	0.707107	234.759	332	8.37504	0.0474649	1	Up	0.047318	5.67106	955
comp123734_c0_seq1	106.773	0	213.546	Inf	Inf	0.032555	1	Up	0	4.1	1198
comp123737_c0_seq1	16201.9	8.48528	32395.4	3817.83	11.8985	0.0105786	0.816596	Up	0.157647	319.423	2338	gi|156356358|ref|XP_001623892.1|predicted protein [Nematostella vectensis]	5e-54	sp|Q8BTK5|SMYD4_MOUSE	4e-25	SET and MYND domain-containing protein 4 OS=Mus musculus GN=Smyd4 PE=2 SV=2	KOG2084	2e-24	Predicted histone tail methylase containing SET domain							GO:0046872;GO:0008168	metal ion binding|methyltransferase activity
comp123741_c0_seq2	3792.57	20.5061	7564.63	368.897	8.52707	0.00613301	0.610299	Up	0.361198	68.3354	2552	gi|829087405|ref|XP_012650117.1|uncharacterized protein [Babesia microti strain RI]	4e-08	sp|P54985|PPIA_BLAGE	9e-10	Peptidyl-prolyl cis-trans isomerase OS=Blattella germanica GN=CYPA PE=2 SV=1	KOG0865	2e-09	Cyclophilin type peptidyl-prolyl cis-trans isomerase	ko04020;ko04022;ko05145;ko05012;ko05016	Calcium signaling pathway|cGMP - PKG signaling pathway|Toxoplasmosis|Parkinson's disease|Huntington's disease	5	K09565	PPIF	peptidyl-prolyl isomerase F (cyclophilin D)	GO:0005737;GO:0042277;GO:0003755;GO:0006457	cytoplasm|peptide binding|peptidyl-prolyl cis-trans isomerase activity|protein folding
comp123768_c0_seq6	858.428	1.41421	1715.44	1213	10.2444	0.00195405	0.378845	Up	0.0815726	66.557	594
comp123772_c0_seq1	150.26	0.707107	299.813	424	8.72792	0.0331815	1	Up	0.0431633	7.01405	987	gi|828195527|ref|XP_012566988.1|PREDICTED: uncharacterized protein LOC105850957 [Hydra vulgaris]	1e-05
comp123775_c0_seq9	185.969	0	371.938	Inf	Inf	0.0129809	0.911117	Up	0	5.23665	1639
comp123776_c0_seq2	177.13	0.707107	353.553	500	8.96578	0.0251767	1	Up	0.0366139	7.37046	1107
comp123785_c0_seq6	100.409	0	200.818	Inf	Inf	0.0355078	1	Up	0	4.65151	993
comp123806_c0_seq9	92.631	0	185.262	Inf	Inf	0.039608	1	Up	0	6.59052	648
comp123856_c0_seq1	1307.79	7.77817	2607.81	335.273	8.38919	0.00498085	0.547995	Up	0.375774	65.1246	923
comp123859_c0_seq1	603.516	0.707107	1206.32	1706	10.7364	0.00226247	0.401214	Up	0.0186239	12.9148	2154
comp123860_c0_seq2	8667.01	97.5807	17236.4	176.638	7.46465	0.0292355	1	Up	1.82412	165.085	2407
comp123866_c0_seq6	97.5807	0	195.161	Inf	Inf	0.0369337	1	Up	0	3.21381	1397
comp123878_c1_seq3	726.552	23.3345	1429.77	61.2727	5.93717	0.0322918	1	Up	0.387777	12.3077	2677	gi|375173472|gb|AFA42359.1|clip domain serine proteinase 1 [Portunus trituberculatus]	5e-62	sp|B5U2W0|VSP_BOMIG	4e-42	Venom serine protease Bi-VSP OS=Bombus ignitus PE=1 SV=1	KOG3627	1e-40	Trypsin							GO:0005576;GO:0016504;GO:0004252	extracellular region|peptidase activator activity|serine-type endopeptidase activity
comp123879_c0_seq1	12836.5	4.94975	25668	5185.71	12.3403	0.00519373	0.561866	Up	0.0947507	258.511	2289
comp123885_c0_seq1	639.225	5.65685	1272.79	225	7.81378	0.00972643	0.772854	Up	0.229692	26.3811	1112
comp123893_c0_seq1	1721.45	38.8909	3404.01	87.5273	6.45166	0.0197612	1	Up	1.31589	59.391	1321
comp123905_c0_seq5	421.789	4.94975	838.629	169.429	7.40453	0.0171766	1	Up	0.223918	19.572	988
comp123917_c0_seq7	564.271	15.5563	1112.99	71.5455	6.16079	0.0307744	1	Up	0.430896	15.5603	1649	gi|669308127|gb|KFD51631.1|hypothetical protein M513_07510, partial [Trichuris suis]	2e-12
comp123921_c0_seq1	22448.2	44882.2	14.1421	0.000315095	-11.6319	0.0242183	1	Down	2838.86	0.472868	712
comp123936_c0_seq1	4757.41	1.41421	9513.41	6727	12.7157	0.000649275	0.33299	Up	0.0367745	159.488	1375
comp123948_c0_seq1	108.187	0	216.375	Inf	Inf	0.0319443	1	Up	0	5.49027	909
comp123961_c0_seq1	166.17	1.41421	330.926	234	7.87036	0.0386784	1	Up	0.0916003	10.7887	708
comp123970_c0_seq3	347.189	1.41421	692.965	490	8.93664	0.00966948	0.770982	Up	0.104295	29.5574	541
comp123983_c0_seq1	1809.84	3619.68	0	0	#NAME?	0.000519336	0.33299	Down	212.548	0	767
comp124003_c1_seq1	2142.53	31.1127	4253.95	136.727	7.09516	0.0127757	0.905092	Up	1.46993	102.799	954
comp124024_c1_seq2	154.149	308.299	0	0	#NAME?	0.0305862	1	Down	11.3436	0	1223	gi|1005490529|ref|XP_015747969.1|PREDICTED: probable L-type lectin-domain containing receptor kinase S.5 [Acropora digitifera]	5e-08
comp124053_c0_seq4	149.553	0.707107	298.399	422	8.7211	0.0334282	1	Up	0.0149307	2.93008	2345
comp124072_c0_seq5	81.3173	0	162.635	Inf	Inf	0.0466893	1	Up	0	7.94259	474
comp124075_c0_seq1	400.222	800.445	0	0	#NAME?	0.00487081	0.547815	Down	8.10621	0	4447	gi|968085742|ref|XP_002061915.2|uncharacterized protein Dwil_GK17254 [Drosophila willistoni]	1e-29
comp124092_c0_seq3	5213.85	2.12132	10425.6	4914.67	12.2629	0.000908559	0.33299	Up	0.0401792	112.683	2133
comp124099_c0_seq1	1592.05	3174.2	9.89949	0.00311873	-8.32482	0.0054563	0.574081	Down	68.2605	0.102755	2094	gi|18858897|ref|NP_572375.1|innexin 2, isoform A [Drosophila melanogaster]	7e-33	sp|Q9V427|INX2_DROME	1e-37	Innexin inx2 OS=Drosophila melanogaster GN=Inx2 PE=1 SV=1										GO:0016324;GO:0016327;GO:0016323;GO:0005737;GO:0005921;GO:0016021;GO:0016328;GO:0005243;GO:0007154;GO:0007440;GO:0007293;GO:0030727;GO:0010496;GO:0006811;GO:0016331;GO:0042048;GO:0055085	apical plasma membrane|apicolateral plasma membrane|basolateral plasma membrane|cytoplasm|gap junction|integral component of membrane|lateral plasma membrane|gap junction channel activity|cell communication|foregut morphogenesis|germarium-derived egg chamber formation|germarium-derived female germ-line cyst formation|intercellular transport|ion transport|morphogenesis of embryonic epithelium|olfa…
comp124115_c0_seq1	1386.28	47.3762	2725.19	57.5224	5.84605	0.0305807	1	Up	2.87981	85.2437	737
comp124134_c0_seq1	218.496	0	436.992	Inf	Inf	0.00931959	0.760778	Up	0	21.5873	467
comp124139_c0_seq1	3793.27	95.4594	7491.09	78.4741	6.29414	0.0281541	1	Up	1.52274	61.1741	2823	gi|510862844|gb|EPB78183.1|hypothetical protein ANCCEY_02730 [Ancylostoma ceylanicum]	2e-21	sp|P53781|TTP_BOVIN	6e-21	Tristetraprolin OS=Bos taurus GN=ZFP36 PE=2 SV=1	KOG1677	4e-23	CCCH-type Zn-finger protein	ko05166	HTLV-I infection	1	K15308	TTP	tristetraprolin	GO:0005737;GO:0010494;GO:0005634;GO:0071889;GO:0017091;GO:0003677;GO:0046872;GO:0070935;GO:0006402;GO:0035278;GO:1900153;GO:0060213;GO:0032680;GO:0042594	cytoplasm|cytoplasmic stress granule|nucleus|14-3-3 protein binding|AU-rich element binding|DNA binding|metal ion binding|3'-UTR-mediated mRNA stabilization|mRNA catabolic process|negative regulation of translation involved in gene silencing by miRNA|positive regulation of nuclear-transcribed mRNA catabolic process, deadenylation-dependent decay|positive regulation of nuclear-transcribed mRNA pol…
comp124180_c0_seq2	160.513	0	321.026	Inf	Inf	0.0171316	1	Up	0	5.72821	1291
comp124203_c0_seq1	576.999	7.07107	1146.93	162.2	7.34163	0.0140189	0.950269	Up	0.120511	9.84133	2688
comp124206_c0_seq4	423.557	0	847.114	Inf	Inf	0.00223322	0.399897	Up	0	15.5876	1253
comp124212_c0_seq11	94.0452	0	188.09	Inf	Inf	0.0388201	1	Up	0	3.35086	1294
comp124265_c0_seq1	1815.14	0	3630.29	Inf	Inf	0.000246373	0.33299	Up	0	93.938	891
comp124275_c0_seq1	3742.36	12.0208	7472.7	621.647	9.27995	0.00366609	0.480273	Up	0.277968	88.3399	1950
comp124316_c1_seq1	2935.2	42.4264	5827.97	137.367	7.10189	0.0141152	0.951994	Up	6.21896	439.059	306
comp124320_c0_seq1	207.182	0	414.365	Inf	Inf	0.0104184	0.808316	Up	0	16.4674	581
comp124321_c0_seq1	5450.73	4.94975	10896.5	2201.43	11.1042	0.00180466	0.378675	Up	0.158982	184.827	1359
comp124329_c1_seq2	321.734	642.053	1.41421	0.00220264	-8.82655	0.0144702	0.966023	Down	14.6431	0.0148783	1974
comp124336_c0_seq1	1504.72	3005.2	4.24264	0.00141176	-9.46828	0.00273258	0.420164	Down	129.019	0.0842701	1049
comp124352_c0_seq1	1699.18	0	3398.36	Inf	Inf	0.000261027	0.33299	Up	0	34.5606	2267
comp124355_c0_seq1	717.713	12.7279	1422.7	111.778	6.80449	0.0178624	1	Up	0.70094	40.6576	807
comp124361_c0_seq2	3426.29	53.033	6799.54	128.213	7.0024	0.0163439	1	Up	1.28699	84.085	1864	gi|585694619|ref|XP_006821857.1|PREDICTED: G2/mitotic-specific cyclin-B-like [Saccoglossus kowalevskii]	5e-27	sp|P25011|CCNB1_SOYBN	5e-21	G2/mitotic-specific cyclin S13-6 OS=Glycine max PE=2 SV=1	KOG0653	1e-20	Cyclin B and related kinase-activating proteins	ko04110;ko04115;ko04068;ko04914	Cell cycle|p53 signaling pathway|FoxO signaling pathway|Progesterone-mediated oocyte maturation	4	K05868	CCNB	cyclin B	GO:0005634;GO:0051301;GO:0007067	nucleus|cell division|mitotic nuclear division
comp124364_c0_seq1	190.919	380.423	1.41421	0.00371747	-8.07146	0.0377139	1	Down	10.1578	0.0228579	1686
comp124427_c0_seq1	4373.81	0.707107	8746.91	12370	13.5946	0.000417125	0.33299	Up	0.0284338	147.405	1368
comp124483_c0_seq1	1234.96	14.8492	2455.07	165.333	7.36923	0.0102774	0.803632	Up	0.666199	55.9186	1012
comp124492_c1_seq11	374.059	0	748.119	Inf	Inf	0.00290828	0.432273	Up	0	20.8176	829
comp124526_c0_seq1	16134.8	49.4975	32220	650.943	9.34639	0.0297655	1	Up	0.743747	246.274	3016
comp124544_c0_seq1	152.028	1.41421	302.642	214	7.74147	0.0444529	1	Up	0.0869897	8.33226	836
comp124547_c0_seq3	240.416	1.41421	479.418	339	8.40514	0.019885	1	Up	0.0775859	11.2985	977
comp124559_c1_seq1	1701.65	45.9619	3357.34	73.0462	6.19074	0.0238732	1	Up	1.4462	54.3548	1424
comp124565_c0_seq2	743.876	1480.68	7.07107	0.00477555	-7.71012	0.0104027	0.808316	Down	48.3496	0.125361	1379
comp124577_c0_seq1	1609.02	4.94975	3213.09	649.143	9.34239	0.00256264	0.410115	Up	0.218605	76.1152	973
comp124580_c0_seq1	7081.32	14141.4	21.2132	0.00150008	-9.38075	0.00755639	0.68415	Down	169.515	0.13142	3757	gi|6560653|gb|AAF16704.1|AF117582_1calcyphosine-like protein [Manduca sexta]	7e-69	sp|P80363|CCB23_ORCLI	1e-64	Crustacean calcium-binding protein 23 OS=Orconectes limosus PE=1 SV=1	KOG0032	8e-68	Ca2+/calmodulin-dependent protein kinase, EF-Hand protein superfamily							GO:0005509	calcium ion binding
comp124593_c0_seq1	13758.2	8.48528	27507.9	3241.83	11.6626	0.00806581	0.701976	Up	0.288203	471.824	1344
comp124601_c0_seq1	86.267	0	172.534	Inf	Inf	0.0434098	1	Up	0	11.0489	361
comp124601_c1_seq2	125.158	0	250.316	Inf	Inf	0.0257292	1	Up	0	5.49038	1051
comp124616_c0_seq19	3255.17	6476.39	33.9411	0.00524075	-7.57601	0.0108084	0.82481	Down	104.39	0.278623	2794	gi|288188858|gb|ADC42879.1|serine proteinase inhibitor 8 [Penaeus monodon]	3e-78	sp|Q4G075|ILEUA_RAT	1e-56	Leukocyte elastase inhibitor A OS=Rattus norvegicus GN=Serpinb1a PE=1 SV=1	KOG2392	1e-50	Serpin	ko05146	Amoebiasis	1	K13963	SERPINB	serpin B	GO:0005737;GO:0005615;GO:0004867;GO:0010951;GO:0042176	cytoplasm|extracellular space|serine-type endopeptidase inhibitor activity|negative regulation of endopeptidase activity|regulation of protein catabolic process
comp124626_c0_seq13	1234.61	2464.97	4.24264	0.00172117	-9.18239	0.00341794	0.468523	Down	13.4766	0.012509	8238	gi|913326127|ref|XP_013194457.1|PREDICTED: myosin heavy chain, muscle isoform X7 [Amyelois transitella]	0	sp|P05661|MYSA_DROME	0	Myosin heavy chain, muscle OS=Drosophila melanogaster GN=Mhc PE=1 SV=4	KOG0161	0	Myosin class II heavy chain	ko05416;ko04260;ko04261	Viral myocarditis|Cardiac muscle contraction|Adrenergic signaling in cardiomyocytes	3	K17751	MYH6_7	myosin heavy chain 6/7	GO:0031672;GO:0016459;GO:0032982;GO:0005703;GO:0030017;GO:0030898;GO:0005524;GO:0042623;GO:0003774;GO:0042803;GO:0008307;GO:0007527;GO:0007298;GO:0007427;GO:0060361;GO:0040011;GO:0042692;GO:0006936;GO:0007517;GO:0071689;GO:0030239;GO:0031033;GO:0050821;GO:0045214;GO:0030241	A band|myosin complex|myosin filament|polytene chromosome puff|sarcomere|actin-dependent ATPase activity|ATP binding|ATPase activity, coupled|motor activity|protein homodimerization activity|structural constituent of muscle|adult somatic muscle development|border follicle cell migration|epithelial cell migration, open tracheal system|flight|locomotion|muscle cell differentiation|muscle contractio…
comp124629_c0_seq1	5337.95	0	10675.9	Inf	Inf	0.000246231	0.33299	Up	0	240.574	1023
comp124650_c1_seq3	405.526	6.36396	804.688	126.444	6.98236	0.0228125	1	Up	0.362709	23.7727	780
comp124673_c0_seq1	259.508	1.41421	517.602	366	8.5157	0.0171765	1	Up	0.0375531	7.74585	1539	gi|1000756493|ref|XP_015601184.1|PREDICTED: carbohydrate sulfotransferase 11-like isoform X2 [Cephus cinctus]	4e-32	sp|Q9JME2|CHSTB_MOUSE	8e-23	Carbohydrate sulfotransferase 11 OS=Mus musculus GN=Chst11 PE=2 SV=1	KOG4651	3e-23	Chondroitin 6-sulfotransferase and related sulfotransferases	ko00532	Glycosaminoglycan biosynthesis - chondroitin sulfate / dermatan sulfate	1	K01017	CHST11	chondroitin 4-sulfotransferase 11	GO:0005794;GO:0000139;GO:0016021;GO:0016020;GO:0047756;GO:0001537;GO:0050659;GO:0008146;GO:0016051;GO:0051216;GO:0002063;GO:0030206;GO:0030204;GO:0048589;GO:0042733;GO:0030326;GO:0048704;GO:0048703;GO:0043066;GO:0030512;GO:0033037;GO:0036342;GO:0009791;GO:0042127;GO:0007585	Golgi apparatus|Golgi membrane|integral component of membrane|membrane|chondroitin 4-sulfotransferase activity|N-acetylgalactosamine 4-O-sulfotransferase activity|N-acetylgalactosamine 4-sulfate 6-O-sulfotransferase activity|sulfotransferase activity|carbohydrate biosynthetic process|cartilage development|chondrocyte development|chondroitin sulfate biosynthetic process|chondroitin sulfate metabol…
comp124677_c0_seq10	80.6102	0	161.22	Inf	Inf	0.0471834	1	Up	0	3.00356	1234
comp124690_c1_seq1	607.051	1205.62	8.48528	0.00703812	-7.15059	0.0165005	1	Down	9.63228	0.035292	5638	gi|390354840|ref|XP_003728420.1|PREDICTED: uncharacterized protein LOC100889564 [Strongylocentrotus purpuratus]	1e-06
comp124693_c0_seq1	92.631	0	185.262	Inf	Inf	0.039608	1	Up	0	6.00517	712
comp124723_c0_seq10	577.353	1140.56	14.1421	0.0123993	-6.3336	0.0282802	1	Down	9.7251	0.0600172	5282	gi|1004400176|gb|KYB27658.1|Peripheral plasma membrane protein CASK-like Protein [Tribolium castaneum]	8e-175	sp|Q9JLB0|MPP6_MOUSE	3e-143	MAGUK p55 subfamily member 6 OS=Mus musculus GN=Mpp6 PE=1 SV=1	KOG0609	1e-167	Calcium/calmodulin-dependent serine protein kinase/membrane-associated guanylate kinase							GO:0070062;GO:0016021;GO:0005886;GO:0004385;GO:0046710;GO:0046037	extracellular exosome|integral component of membrane|plasma membrane|guanylate kinase activity|GDP metabolic process|GMP metabolic process
comp124738_c1_seq3	541.644	1060.66	22.6274	0.0213333	-5.55075	0.0483086	1	Down	5.15091	0.0553548	9276	gi|29134779|dbj|BAC66140.1|projectin [Procambarus clarkii]	0	sp|Q23551|UNC22_CAEEL	0	Twitchin OS=Caenorhabditis elegans GN=unc-22 PE=1 SV=3	KOG0613	0	Projectin/twitchin and related proteins							GO:0031672;GO:0005524;GO:0046872;GO:0004674;GO:0018105;GO:0018107	A band|ATP binding|metal ion binding|protein serine/threonine kinase activity|peptidyl-serine phosphorylation|peptidyl-threonine phosphorylation
comp124754_c0_seq4	774.635	3.53553	1545.74	437.2	8.77215	0.00474744	0.541981	Up	0.106915	24.2008	1473
comp124765_c0_seq2	2952.52	127.986	5777.06	45.1381	5.49627	0.0438798	1	Up	1.59104	36.8067	3618	gi|1022771726|gb|KZS15977.1|Ras-GEF domain-containing family member 1A [Daphnia magna]	0	sp|Q6DHR3|RG1BA_DANRE	5e-176	Ras-GEF domain-containing family member 1B-A OS=Danio rerio GN=rasgef1ba PE=2 SV=2	KOG3541	2e-130	Predicted guanine nucleotide exchange factor							GO:0005622;GO:0005088;GO:0007264	intracellular|Ras guanyl-nucleotide exchange factor activity|small GTPase mediated signal transduction
comp124767_c0_seq1	452.548	0	905.097	Inf	Inf	0.00194653	0.378845	Up	0	18.9478	1102
comp124768_c0_seq6	250.316	1.41421	499.217	353	8.46352	0.0184126	1	Up	0.078119	13.4232	858
comp124772_c0_seq1	1735.95	3469.07	2.82843	0.000815328	-10.2603	0.00173841	0.374428	Down	87.3752	0.045525	1788
comp124786_c0_seq1	141.421	282.843	0	0	#NAME?	0.0349196	1	Down	29.1456	0	437
comp124803_c0_seq6	337.29	0	674.58	Inf	Inf	0.00364159	0.480273	Up	0	9.72297	1599
comp124849_c0_seq1	4944.44	2.12132	9886.77	4660.67	12.1863	0.000877661	0.33299	Up	0.0953159	251.298	907
comp124853_c0_seq1	125.158	0	250.316	Inf	Inf	0.0257292	1	Up	0	6.34906	910
comp124856_c0_seq1	133.643	0	267.286	Inf	Inf	0.0232426	1	Up	0	13.5583	454
comp124857_c0_seq1	35945.8	4.24264	71887.3	16944	14.0485	0.0422606	1	Up	0.139514	1118.22	1482
comp124863_c0_seq23	131.522	263.044	0	0	#NAME?	0.0388386	1	Down	5.52431	0	2145	gi|1009547437|ref|XP_015909600.1|PREDICTED: solute carrier family 43 member 3-like [Parasteatoda tepidariorum]	2e-44	sp|Q1JPD8|S43A3_BOVIN	6e-22	Solute carrier family 43 member 3 OS=Bos taurus GN=SLC43A3 PE=2 SV=1										GO:0016021;GO:0055085	integral component of membrane|transmembrane transport
comp124873_c0_seq3	444.063	1.41421	886.712	627	9.29232	0.00598672	0.605567	Up	0.0330809	9.06532	2254	gi|585703184|ref|XP_006823204.1|PREDICTED: 4-coumarate--CoA ligase 1-like, partial [Saccoglossus kowalevskii]	2e-102	sp|Q54P79|4CL3_DICDI	6e-98	Probable 4-coumarate--CoA ligase 3 OS=Dictyostelium discoideum GN=4cl3 PE=3 SV=2	KOG1176	3e-85	Acyl-CoA synthetase							GO:0016207;GO:0005524;GO:0009698	4-coumarate-CoA ligase activity|ATP binding|phenylpropanoid metabolic process
comp124880_c0_seq3	298.753	3.53553	593.97	168	7.39232	0.0243787	1	Up	0.131812	10.8696	1259
comp124885_c0_seq1	2522.96	0	5045.91	Inf	Inf	0.000201044	0.33299	Up	0	101.147	1150	gi|1011100764|gb|KYN95379.1|cyclin [Plasmodium reichenowi]	8e-08
comp124889_c0_seq1	17756.2	35495.3	16.9706	0.000478107	-11.0304	0.0185337	1	Down	1057.93	0.258087	1511	gi|363498186|gb|AEW24505.1|Kazal-type protease inhibitor [Macrobrachium nipponense]	2e-72	sp|P31696|AGRIN_CHICK	8e-15	Agrin OS=Gallus gallus GN=AGRN PE=1 SV=3	KOG3509	1e-13	Basement membrane-specific heparan sulfate proteoglycan (HSPG) core protein	ko04512	ECM-receptor interaction	1	K06254	AGRN	agrin	GO:0005605;GO:0030054;GO:0005576;GO:0016021;GO:0005886;GO:0045202;GO:0030548;GO:0005509;GO:0035374;GO:0002162;GO:0043395;GO:0008201;GO:0043236;GO:0033691;GO:0030297;GO:0007171;GO:0030154;GO:0007213;GO:0007275;GO:0051491;GO:0043547;GO:0045887;GO:0045944;GO:0043113;GO:0010469	basal lamina|cell junction|extracellular region|integral component of membrane|plasma membrane|synapse|acetylcholine receptor regulator activity|calcium ion binding|chondroitin sulfate binding|dystroglycan binding|heparan sulfate proteoglycan binding|heparin binding|laminin binding|sialic acid binding|transmembrane receptor protein tyrosine kinase activator activity|activation of transmembrane re…
comp124896_c0_seq3	131.522	263.044	0	0	#NAME?	0.0388386	1	Down	8.55012	0	1387	gi|340724970|ref|XP_003400849.1|PREDICTED: uncharacterized protein LOC100645608 [Bombus terrestris]	6e-08
comp124917_c0_seq1	1947.02	51.6188	3842.42	74.4384	6.21797	0.0237233	1	Up	1.61533	61.251	1446
comp124924_c0_seq1	153.442	306.884	0	0	#NAME?	0.0308094	1	Down	4.8242	0	2866	gi|936680550|ref|XP_014237291.1|PREDICTED: elongation of very long chain fatty acids protein AAEL008004-like isoform X3 [Trichogramma pretiosum]	4e-85	sp|Q1HRV8|ELVL1_AEDAE	6e-75	Elongation of very long chain fatty acids protein AAEL008004 OS=Aedes aegypti GN=AAEL008004 PE=2 SV=2	KOG3071	2e-69	Fatty acyl-CoA elongase/Polyunsaturated fatty acid specific elongation enzyme	ko00062	Fatty acid elongation	1	K10250	ELOVL7	elongation of very long chain fatty acids protein 7	GO:0030176;GO:0016740;GO:0006633	integral component of endoplasmic reticulum membrane|transferase activity|fatty acid biosynthetic process
comp124934_c1_seq4	2579.53	43.8406	5115.21	116.677	6.86638	0.0158624	1	Up	1.0081	60.3439	1954
comp124937_c0_seq1	126.572	0	253.144	Inf	Inf	0.0252905	1	Up	0	6.34711	917
comp124963_c0_seq1	95.4594	0	190.919	Inf	Inf	0.0380515	1	Up	0	2.8572	1540
comp124977_c1_seq1	6540.03	11.3137	13068.7	1155.12	10.1738	0.00409864	0.505589	Up	0.211858	122.373	2462	gi|746848140|ref|XP_011054466.1|PREDICTED: uncharacterized protein LOC105146109 [Acromyrmex echinatior]	3e-41	sp|Q28278|PROC_CANFA	5e-26	Vitamin K-dependent protein C OS=Canis familiaris GN=PROC PE=2 SV=2	KOG3627	4e-37	Trypsin							GO:0005576;GO:0005509;GO:0004252;GO:0007596	extracellular region|calcium ion binding|serine-type endopeptidase activity|blood coagulation
comp124997_c0_seq1	144.25	1.41421	287.085	203	7.66534	0.0480569	1	Up	0.0504202	6.41657	1032
comp125002_c0_seq1	149.2	0	298.399	Inf	Inf	0.0194367	1	Up	0	3.91901	1752
comp125009_c0_seq1	95.4594	0	190.919	Inf	Inf	0.0380515	1	Up	0	2.41376	1826
comp125026_c0_seq1	5769.99	11537.2	2.82843	0.000245158	-11.994	0.00142525	0.346476	Down	991.58	0.110415	524
comp125027_c0_seq1	99.7021	0	199.404	Inf	Inf	0.0358575	1	Up	0	2.33899	1967	gi|443708311|gb|ELU03480.1|hypothetical protein CAPTEDRAFT_192646 [Capitella teleta]	2e-96	sp|Q18297|TRPA1_CAEEL	1e-63	Transient receptor potential cation channel subfamily A member 1 homolog OS=Caenorhabditis elegans GN=trpa-1 PE=2 SV=5	KOG0510	4e-64	Ankyrin repeat protein
comp125064_c0_seq1	2088.44	4094.86	82.0244	0.0200311	-5.64162	0.0365101	1	Down	56.3597	0.582862	3272	gi|123469906|ref|XP_001318162.1|viral A-type inclusion protein [Trichomonas vaginalis G3]	3e-29
comp125074_c0_seq1	1513.92	0	3027.83	Inf	Inf	0.000292223	0.33299	Up	0	25.7532	2710
comp125084_c1_seq1	141.421	282.843	0	0	#NAME?	0.0349196	1	Down	7.23529	0	1761	gi|1004398170|gb|EFA05857.2|Alpha-(1,3)-fucosyltransferase C-like Protein [Tribolium castaneum]	3e-46	sp|P83088|FUCTC_DROME	7e-42	Alpha-(1,3)-fucosyltransferase C OS=Drosophila melanogaster GN=FucTC PE=2 SV=4	KOG2619	3e-27	Fucosyltransferase	ko00513	Various types of N-glycan biosynthesis	1	K14464	FUT-1, FucTC	alpha-1,3-fucosyltransferase	GO:0032580;GO:0016021;GO:0008417;GO:0036065;GO:0006486	Golgi cisterna membrane|integral component of membrane|fucosyltransferase activity|fucosylation|protein glycosylation
comp125086_c0_seq1	2263.1	20.5061	4505.68	219.724	7.77955	0.00791683	0.693789	Up	0.593419	67.8414	1531
comp125090_c0_seq2	304.409	3.53553	605.283	171.2	7.41954	0.0235575	1	Up	0.181028	15.4187	906
comp125092_c0_seq4	3220.52	125.158	6315.88	50.4633	5.65716	0.0404702	1	Up	6.95357	179.761	810
comp125100_c0_seq4	4718.52	9434.22	2.82843	0.000299805	-11.7037	0.00125935	0.34072	Down	112.429	0.0155329	3779	gi|1419728|emb|CAA46637.1|Blastula protease-10 [Paracentrotus lividus]	5e-50	sp|P42674|BP10_PARLI	6e-52	Blastula protease 10 OS=Paracentrotus lividus GN=BP10 PE=2 SV=1	KOG3714	4e-32	Meprin A metalloprotease							GO:0005938;GO:0005615;GO:0048471;GO:0004222;GO:0008270	cell cortex|extracellular space|perinuclear region of cytoplasm|metalloendopeptidase activity|zinc ion binding
comp125125_c0_seq1	288.853	4.94975	572.756	115.714	6.85442	0.0334889	1	Up	0.098656	6.10268	2163
comp125140_c0_seq1	1152.23	30.4056	2274.06	74.7907	6.22479	0.0236064	1	Up	0.70055	26.8341	1953
comp125140_c2_seq1	372.999	6.36396	739.634	116.222	6.86074	0.0263272	1	Up	0.152505	8.96911	1900	gi|936683621|ref|XP_014238865.1|PREDICTED: MFS-type transporter SLC18B1-like [Trichogramma pretiosum]	2e-118	sp|D3Z5L6|S18B1_MOUSE	1e-54	MFS-type transporter SLC18B1 OS=Mus musculus GN=Slc18b1 PE=2 SV=2	KOG3764	2e-71	Vesicular amine transporter							GO:0016021;GO:0055085	integral component of membrane|transmembrane transport
comp125149_c0_seq2	2024.09	64.3467	3983.84	61.9121	5.95215	0.0289231	1	Up	3.35111	106.794	860	gi|914578660|gb|KOB85086.1|hypothetical protein PFDG_00447 [Plasmodium falciparum Dd2]	1e-14
comp125160_c0_seq1	135.411	270.822	0	0	#NAME?	0.0372331	1	Down	5.48967	0	2224
comp125174_c0_seq1	4833.07	4.24264	9661.91	2277.33	11.1531	0.00148886	0.356031	Up	0.0949458	103.357	2155	gi|675882828|ref|XP_009026916.1|hypothetical protein HELRODRAFT_102838 [Helobdella robusta]	2e-23	sp|O94451|PLI1_SCHPO	7e-22	E3 SUMO-protein ligase pli1 OS=Schizosaccharomyces pombe (strain 972 / ATCC 24843) GN=pli1 PE=1 SV=3	KOG2169	2e-22	Zn-finger transcription factor	ko04630;ko04120;ko05160	Jak-STAT signaling pathway|Ubiquitin mediated proteolysis|Hepatitis C	3	K04706	PIAS1	E3 SUMO-protein ligase PIAS1	GO:0005634;GO:0035861;GO:0016874;GO:0061665;GO:0008270;GO:0030999;GO:2000042;GO:0016925;GO:0007131;GO:0000019;GO:0010520;GO:0032204	nucleus|site of double-strand break|ligase activity|SUMO ligase activity|zinc ion binding|linear element assembly|negative regulation of double-strand break repair via homologous recombination|protein sumoylation|reciprocal meiotic recombination|regulation of mitotic recombination|regulation of reciprocal meiotic recombination|regulation of telomere maintenance
comp125195_c0_seq1	413.657	0	827.315	Inf	Inf	0.00234697	0.406158	Up	0	19.525	977
comp125197_c0_seq2	216.021	432.042	0	0	#NAME?	0.0167466	1	Down	11.4742	0	1697	gi|961117160|ref|XP_014781176.1|PREDICTED: tigger transposable element-derived protein 1-like [Octopus bimaculoides]	2e-56	sp|Q96MW7|TIGD1_HUMAN	2e-45	Tigger transposable element-derived protein 1 OS=Homo sapiens GN=TIGD1 PE=1 SV=1	KOG3105	6e-46	DNA-binding centromere protein B (CENP-B)							GO:0005634;GO:0003677	nucleus|DNA binding
comp125201_c0_seq2	689.783	1379.57	0	0	#NAME?	0.00180416	0.378675	Down	154.947	0	401
comp125215_c0_seq3	78.4889	0	156.978	Inf	Inf	0.048707	1	Up	0	3.69862	982
comp125220_c1_seq1	1753.98	55.8614	3452.1	61.7975	5.94948	0.0285096	1	Up	3.88577	122.825	648
comp125243_c0_seq2	667.862	10.6066	1325.12	124.933	6.96501	0.0165571	1	Up	1.0206	65.9765	463
comp125246_c0_seq2	803.627	17.6777	1589.58	89.92	6.49057	0.0212429	1	Up	0.393618	18.2595	2006
comp125264_c0_seq3	295.571	0	591.141	Inf	Inf	0.0048662	0.547815	Up	0	13.0276	1045
comp125266_c0_seq6	129.754	259.508	0	0	#NAME?	0.0395993	1	Down	4.90995	0	2382	gi|239949539|gb|ACS36544.1|troponin C isoform 4' [Homarus americanus]	3e-57	sp|P06708|TNNC2_ASTLP	4e-56	Troponin C, isotype gamma OS=Astacus leptodactylus PE=1 SV=1	KOG0027	3e-45	Calmodulin and related proteins (EF-Hand superfamily)	ko04114;ko04014;ko04015;ko04016;ko04020;ko04022;ko04024;ko04070;ko04371;ko05214;ko05418;ko05133;ko05152;ko05010;ko05031;ko05034;ko04261;ko04270;ko04970;ko04971;ko04910;ko04912;ko04915;ko04916;ko04921;ko04922;ko04924;ko04925;ko04626;ko04713;ko04720;ko04722;ko04728;ko04740;ko04744;ko04745;ko04750	Oocyte meiosis|Ras signaling pathway|Rap1 signaling pathway|MAPK signaling pathway - plant|Calcium signaling pathway|cGMP - PKG signaling pathway|cAMP signaling pathway|Phosphatidylinositol signaling system|Apelin signaling pathway|Glioma|Fluid shear stress and atherosclerosis|Pertussis|Tuberculosis|Alzheimer's disease|Amphetamine addiction|Alcoholism|Adrenergic signaling in cardiomyocytes|Vascul…	37	K02183	CALM	calmodulin	GO:0005509	calcium ion binding
comp125282_c0_seq1	198.697	0	397.394	Inf	Inf	0.0113584	0.845397	Up	0	11.9216	769
comp125288_c0_seq2	116.319	232.638	0	0	#NAME?	0.0461266	1	Down	8.0461	0	1302
comp125296_c0_seq1	991.364	5.65685	1977.07	349.5	8.44915	0.0051547	0.559008	Up	0.509916	89.877	507
comp125296_c2_seq3	1568.72	3.53553	3133.9	886.4	9.79181	0.00192517	0.378845	Up	0.190526	82.271	878
comp125298_c0_seq1	846.407	0	1692.81	Inf	Inf	0.000628149	0.33299	Up	0	22.8167	1711
comp125328_c0_seq1	121.622	0	243.245	Inf	Inf	0.0268729	1	Up	0	3.76427	1489
comp125336_c0_seq1	1776.25	0	3552.5	Inf	Inf	0.000250946	0.33299	Up	0	93.8988	872
comp125339_c1_seq1	14241.1	130.108	28352.2	217.913	7.76761	0.0481982	1	Up	2.82083	314.523	2078	gi|936704963|ref|XP_014230448.1|PREDICTED: THO complex subunit 4-like [Trichogramma pretiosum]	4e-20	sp|Q28FB9|THOC4_XENTR	2e-15	THO complex subunit 4 OS=Xenopus tropicalis GN=alyref PE=2 SV=1	KOG0533	5e-20	RRM motif-containing protein	ko03040;ko03013;ko03015;ko05168	Spliceosome|RNA transport|mRNA surveillance pathway|Herpes simplex infection	4	K12881	THOC4, ALY	THO complex subunit 4	GO:0005737;GO:0016607;GO:0000166;GO:0003723;GO:0006397;GO:0051028;GO:0008380	cytoplasm|nuclear speck|nucleotide binding|RNA binding|mRNA processing|mRNA transport|RNA splicing
comp125343_c0_seq1	1632.71	3265.42	0	0	#NAME?	0.00057078	0.33299	Down	78.7275	0	1868	gi|957820276|ref|XP_014678843.1|PREDICTED: protein UBASH3A homolog [Priapulus caudatus]	7e-07
comp125373_c0_seq1	160.513	0	321.026	Inf	Inf	0.0171316	1	Up	0	4.65136	1590
comp125381_c0_seq6	497.096	0	994.192	Inf	Inf	0.00160973	0.365346	Up	0	16.9419	1352
comp125388_c1_seq1	371.231	0	742.462	Inf	Inf	0.00295624	0.434292	Up	0	19.0614	898
comp125396_c0_seq1	927.371	2.12132	1852.62	873.333	9.77039	0.00237084	0.406158	Up	0.178354	80.5999	530
comp125429_c0_seq3	177.484	354.968	0	0	#NAME?	0.0241522	1	Down	7.60963	0	2099	gi|924565229|gb|ALC49854.1|Tis11, partial [Drosophila busckii]	3e-24	sp|Q805B4|TISDB_XENLA	3e-26	Zinc finger protein 36, C3H1 type-like 2-B OS=Xenopus laevis GN=zfp36l2-B PE=2 SV=1	KOG1677	3e-26	CCCH-type Zn-finger protein	ko05166	HTLV-I infection	1	K15308	TTP	tristetraprolin	GO:0005737;GO:0005634;GO:0003677;GO:0046872;GO:0035925;GO:0060216;GO:0030097;GO:0006402;GO:2000737;GO:0072080;GO:0000288;GO:1900153;GO:0039020;GO:0048793;GO:0043488;GO:0048103;GO:0035019	cytoplasm|nucleus|DNA binding|metal ion binding|mRNA 3'-UTR AU-rich region binding|definitive hemopoiesis|hemopoiesis|mRNA catabolic process|negative regulation of stem cell differentiation|nephron tubule development|nuclear-transcribed mRNA catabolic process, deadenylation-dependent decay|positive regulation of nuclear-transcribed mRNA catabolic process, deadenylation-dependent decay|pronephric …
comp125438_c0_seq2	4089.91	8178.4	1.41421	0.000172921	-12.4976	0.000805364	0.33299	Down	162.751	0.015817	2263
comp125439_c0_seq4	143.543	0	287.085	Inf	Inf	0.0207241	1	Up	0	5.77827	1144
comp125442_c0_seq1	229.81	0	459.619	Inf	Inf	0.00837512	0.716555	Up	0	10.9561	966
comp125445_c0_seq1	1096.02	0	2192.03	Inf	Inf	0.000430647	0.33299	Up	0	99.4737	508	gi|780086438|ref|XP_011673469.1|PREDICTED: fibrillin-1 [Strongylocentrotus purpuratus]	1e-12
comp125445_c1_seq1	3814.13	1.41421	7626.85	5393	12.3969	0.000598674	0.33299	Up	0.0316138	70.9483	2478	gi|118347573|ref|XP_001007263.1|H-type lectin domain protein [Tetrahymena thermophila SB210]	3e-42
comp125458_c0_seq1	621.547	2.82843	1240.27	438.5	8.77643	0.00553306	0.579293	Up	0.148935	35.2099	812
comp125485_c0_seq1	22521.7	28.9914	45014.4	1552.68	10.6005	0.0337372	1	Up	0.729189	577.147	1798	gi|954191520|gb|KRX04286.1|Cyclic nucleotide-binding protein [Pseudocohnilembus persalinus]	2e-08				KOG2177	9e-06	Predicted E3 ubiquitin ligase
comp125491_c0_seq2	482.954	965.908	0	0	#NAME?	0.00338132	0.467128	Down	37.9829	0	1145
comp125501_c0_seq2	22209.9	44388.6	31.1127	0.000700916	-10.4785	0.0348702	1	Down	1786.45	0.652685	1119
comp125513_c0_seq1	6708.32	115.966	13300.7	114.695	6.84166	0.0309742	1	Up	1.94423	114.45	2679	gi|939667427|ref|XP_014280810.1|PREDICTED: iodotyrosine dehalogenase 1 [Halyomorpha halys]	2e-80	sp|Q5REW1|IYD1_PONAB	3e-92	Iodotyrosine dehalogenase 1 OS=Pongo abelii GN=IYD PE=2 SV=1	KOG3936	5e-69	Nitroreductases	ko04918	Thyroid hormone synthesis	1	K17231	IYD, DEHAL1	iodotyrosine deiodinase	GO:0016021;GO:0016491	integral component of membrane|oxidoreductase activity
comp125544_c0_seq1	3260.47	130.108	6390.83	49.1196	5.61823	0.0417759	1	Up	2.11966	53.2473	2767	gi|972184594|ref|XP_015173767.1|PREDICTED: membrane metallo-endopeptidase-like 1 isoform X3 [Polistes dominula]	0	sp|Q495T6|MMEL1_HUMAN	7e-179	Membrane metallo-endopeptidase-like 1 OS=Homo sapiens GN=MMEL1 PE=2 SV=2	KOG3624	0	M13 family peptidase							GO:0005783;GO:0005615;GO:0005794;GO:0016021;GO:0004222;GO:0008270	endoplasmic reticulum|extracellular space|Golgi apparatus|integral component of membrane|metalloendopeptidase activity|zinc ion binding
comp125550_c0_seq1	99.7021	0	199.404	Inf	Inf	0.0358575	1	Up	0	3.96754	1161
comp125552_c0_seq13	103.238	0	206.475	Inf	Inf	0.0341531	1	Up	0	4.88375	977
comp125553_c0_seq1	185.969	371.938	0	0	#NAME?	0.0222109	1	Down	6.4623	0	2590
comp125553_c6_seq4	5114.15	10225.5	2.82843	0.000276606	-11.8199	0.00131085	0.34147	Down	329.399	0.0473752	1398	gi|123385784|ref|XP_001299166.1|hypothetical protein [Trichomonas vaginalis G3]	2e-06
comp125562_c0_seq9	442.295	0.707107	883.883	1250	10.2877	0.00404578	0.505249	Up	0.0396181	18.0459	1130
comp125576_c0_seq3	720.542	1441.08	0	0	#NAME?	0.00168037	0.370286	Down	34.2785	0	1893
comp125589_c0_seq5	169.706	1.41421	337.997	239	7.90087	0.037369	1	Up	0.0545293	5.34201	1458
comp125605_c0_seq8	124.804	0.707107	248.902	352	8.45943	0.0437381	1	Up	0.0718113	8.9016	645
comp125652_c0_seq1	2428.91	0	4857.82	Inf	Inf	0.000204162	0.33299	Up	0	134.918	830
comp125653_c0_seq7	1266.78	64.3467	2469.22	38.3736	5.26204	0.0468102	1	Up	0.842957	16.5075	3449	gi|1022777843|gb|KZS21337.1|Uridine phosphorylase 1 [Daphnia magna]	8e-125	sp|Q16831|UPP1_HUMAN	3e-87	Uridine phosphorylase 1 OS=Homo sapiens GN=UPP1 PE=1 SV=1	KOG3728	4e-123	Uridine phosphorylase	ko00240;ko00983	Pyrimidine metabolism|Drug metabolism - other enzymes	2	K00757	udp, UPP	uridine phosphorylase	GO:0005829;GO:0004850;GO:0042149;GO:0006139;GO:0055086;GO:0009166;GO:0006206;GO:0046135;GO:0043097;GO:0044281;GO:0044206;GO:0006218	cytosol|uridine phosphorylase activity|cellular response to glucose starvation|nucleobase-containing compound metabolic process|nucleobase-containing small molecule metabolic process|nucleotide catabolic process|pyrimidine nucleobase metabolic process|pyrimidine nucleoside catabolic process|pyrimidine nucleoside salvage|small molecule metabolic process|UMP salvage|uridine catabolic process
comp125661_c2_seq7	194.808	2.12132	387.495	182.667	7.51307	0.0371445	1	Up	0.0894265	7.18473	1243
comp125662_c0_seq5	1273.5	11.3137	2535.68	224.125	7.80816	0.00749601	0.683549	Up	0.95003	111.537	524
comp125672_c2_seq1	2235.16	0	4470.33	Inf	Inf	0.000212824	0.33299	Up	0	60.0836	1715	gi|1022757847|gb|KZS04440.1|Major facilitator superfamily transporter 17 [Daphnia magna]	8e-98	sp|Q9MZD1|S17A5_SHEEP	3e-91	Sialin OS=Ovis aries GN=SLC17A5 PE=2 SV=1	KOG2532	3e-102	Permease of the major facilitator superfamily	ko04142	Lysosome	1	K12301	SLC17A5	MFS transporter, ACS family, solute carrier family 17 (sodium-dependent inorganic phosphate cotransporter), member 5	GO:0016021;GO:0005765;GO:0015293	integral component of membrane|lysosomal membrane|symporter activity
comp125676_c0_seq1	287.439	4.94975	569.928	115.143	6.84728	0.0337773	1	Up	0.177231	10.7081	1228
comp125686_c1_seq6	743.523	1481.39	5.65685	0.00381862	-8.03273	0.00859393	0.73033	Down	82.4819	0.158339	809
comp125694_c0_seq2	99.7021	0	199.404	Inf	Inf	0.0358575	1	Up	0	4.85815	947
comp125695_c0_seq1	195.161	0	390.323	Inf	Inf	0.0117823	0.862942	Up	0	7.13969	1258
comp125721_c1_seq6	108.187	0	216.375	Inf	Inf	0.0319443	1	Up	0	4.81877	1034	gi|641660992|ref|XP_008181699.1|PREDICTED: uncharacterized protein LOC103309014 [Acyrthosiphon pisum]	1e-09
comp125733_c0_seq4	170.766	341.533	0	0	#NAME?	0.0258327	1	Down	6.88708	0	2234
comp125735_c0_seq2	1082.23	3.53553	2160.92	611.2	9.2555	0.00296828	0.434398	Up	0.191564	63.9504	779
comp125779_c1_seq2	97.5807	0	195.161	Inf	Inf	0.0369337	1	Up	0	3.30718	1364
comp125790_c1_seq9	115.258	230.517	0	0	#NAME?	0.0467065	1	Down	6.56562	0	1580
comp125800_c0_seq3	2062.63	0	4125.26	Inf	Inf	0.000223669	0.33299	Up	0	232.515	409
comp125811_c0_seq11	447.245	891.662	2.82843	0.00317209	-8.30035	0.0115984	0.852821	Down	43.5551	0.0554301	922
comp125818_c0_seq1	1265.72	7.07107	2524.37	357	8.47978	0.00470862	0.541981	Up	0.312796	54.9042	1060
comp125824_c0_seq1	24015.5	43.8406	47987.1	1094.58	10.0962	0.0457405	1	Up	1.18841	663.216	1668
comp125847_c0_seq2	1070.91	4.94975	2136.88	431.714	8.75393	0.00410268	0.505589	Up	0.198195	44.7115	1102
comp125861_c0_seq1	585.838	4.94975	1166.73	235.714	7.8809	0.00987518	0.780582	Up	0.211972	25.8603	1040
comp125876_c0_seq3	943.28	0	1886.56	Inf	Inf	0.000532548	0.33299	Up	0	32.2013	1351
comp125895_c0_seq1	3236.43	21.2132	6451.64	304.133	8.24856	0.00665484	0.641961	Up	0.384495	60.852	2444	gi|443683291|gb|ELT87590.1|hypothetical protein CAPTEDRAFT_209791 [Capitella teleta]	2e-50	sp|Q8N6F8|WBS27_HUMAN	6e-16	Williams-Beuren syndrome chromosomal region 27 protein OS=Homo sapiens GN=WBSCR27 PE=1 SV=2	KOG1541	1e-16	Predicted protein carboxyl methylase							GO:0008757;GO:0032259	S-adenosylmethionine-dependent methyltransferase activity|methylation
comp125900_c0_seq1	5948.89	14.1421	11883.6	840.3	9.71476	0.00465948	0.540899	Up	0.630744	270.7	1012
comp125903_c0_seq5	333.047	664.68	1.41421	0.00212766	-8.87652	0.0135449	0.931045	Down	10.7078	0.0127714	2795	gi|957853306|ref|XP_014676596.1|PREDICTED: sodium/glucose cotransporter 4-like [Priapulus caudatus]	5e-72	sp|Q5FY69|SC5AA_PIG	2e-64	Sodium/glucose cotransporter 5 OS=Sus scrofa GN=SLC5A10 PE=2 SV=1	KOG2349	6e-65	Na+:iodide/myo-inositol/multivitamin symporters							GO:0016021;GO:0005886;GO:0005215;GO:0006814;GO:0055085	integral component of membrane|plasma membrane|transporter activity|sodium ion transport|transmembrane transport
comp125909_c0_seq1	613.769	22.6274	1204.91	53.25	5.73471	0.0394456	1	Up	0.827999	22.7396	1222
comp125915_c0_seq1	1893.63	12.7279	3774.54	296.556	8.21216	0.00560853	0.582944	Up	0.865552	134.913	645
comp125923_c1_seq1	7979.7	15953.7	5.65685	0.000354578	-11.4616	0.00312939	0.447616	Down	380.755	0.0615318	1887	gi|13345187|gb|AAK19244.1|AF312916_1reticulocyte binding protein 2 homolog A [Plasmodium falciparum]	3e-06
comp125948_c0_seq1	11639	1.41421	23276.5	16459	14.0066	0.00219254	0.396667	Up	0.0259667	190.824	2812	gi|822476993|gb|AKH66779.1|autophagy protein 8 [Artemia parthenogenetica]	6e-08	sp|Q5RF21|GBRL1_PONAB	3e-09	Gamma-aminobutyric acid receptor-associated protein-like 1 OS=Pongo abelii GN=GABARAPL1 PE=3 SV=1	KOG1654	3e-09	Microtubule-associated anchor protein involved in autophagy and membrane trafficking	ko04138;ko04139;ko04140;ko04068;ko04371;ko04212;ko04621;ko04727	Autophagy - yeast|Mitophagy - yeast|Autophagy - animal|FoxO signaling pathway|Apelin signaling pathway|Longevity regulating pathway - worm|NOD-like receptor signaling pathway|GABAergic synapse	8	K08341	GABARAP, ATG8, LC3	GABA(A) receptor-associated protein	GO:0005776;GO:0030659;GO:0005783;GO:0005794;GO:0005874;GO:0006914	autophagosome|cytoplasmic vesicle membrane|endoplasmic reticulum|Golgi apparatus|microtubule|autophagy
comp125964_c0_seq1	870.448	0	1740.9	Inf	Inf	0.000601347	0.33299	Up	0	24.7663	1621	gi|170049407|ref|XP_001855904.1|anaphase-promoting complex subunit 10 [Culex quinquefasciatus]	3e-50	sp|Q9V831|APC10_DROME	8e-58	Anaphase-promoting complex subunit 10 OS=Drosophila melanogaster GN=APC10 PE=2 SV=2	KOG3437	2e-58	Anaphase-promoting complex (APC), subunit 10	ko04110;ko04111;ko04113;ko04114;ko04120;ko05166;ko04914	Cell cycle|Cell cycle - yeast|Meiosis - yeast|Oocyte meiosis|Ubiquitin mediated proteolysis|HTLV-I infection|Progesterone-mediated oocyte maturation	7	K03357	APC10, DOC1	anaphase-promoting complex subunit 10	GO:0005680;GO:0090302;GO:0031145;GO:0051301;GO:0007113;GO:0007067;GO:0022008;GO:0045842	anaphase-promoting complex|APC-Cdc20 complex activity|anaphase-promoting complex-dependent proteasomal ubiquitin-dependent protein catabolic process|cell division|endomitotic cell cycle|mitotic nuclear division|neurogenesis|positive regulation of mitotic metaphase/anaphase transition
comp125966_c1_seq1	1111.57	0	2223.14	Inf	Inf	0.000422564	0.33299	Up	0	36.4582	1406
comp125973_c0_seq1	1205.26	3.53553	2406.99	680.8	9.41109	0.00259073	0.411405	Up	0.105483	40.4335	1372
comp125981_c0_seq1	4917.93	154.149	9681.71	62.8073	5.97286	0.0408566	1	Up	1.93351	62.1506	3591	gi|926606732|ref|XP_013774111.1|PREDICTED: pituitary homeobox x-like [Limulus polyphemus]	5e-46	sp|Q9U637|PITX_BRABE	1e-46	Pituitary homeobox x OS=Branchiostoma belcheri GN=Ptx PE=2 SV=1	KOG0486	4e-41	Transcription factor PTX1, contains HOX domain	ko04350	TGF-beta signaling pathway	1	K04686	PITX2	paired-like homeodomain transcription factor 2	GO:0005634;GO:0043565;GO:0003700;GO:0007275	nucleus|sequence-specific DNA binding|transcription factor activity, sequence-specific DNA binding|multicellular organismal development
comp125992_c0_seq1	185.969	371.938	0	0	#NAME?	0.0222109	1	Down	11.6902	0	1432
comp126015_c0_seq1	254.558	0	509.117	Inf	Inf	0.0067362	0.645551	Up	0	3.44545	3405	gi|924560348|gb|ALC48107.1|CG31998, partial [Drosophila busckii]	2e-08
comp126016_c0_seq1	359.564	6.36396	712.764	112	6.80735	0.0280425	1	Up	0.328893	18.3485	895
comp126021_c0_seq5	378.302	749.533	7.07107	0.00943396	-6.72792	0.0303543	1	Down	10.5912	0.0509819	3188	gi|870825956|gb|AKP18002.1|chitinase 3 [Eriocheir sinensis]	4e-176	sp|Q13231|CHIT1_HUMAN	1e-78	Chitotriosidase-1 OS=Homo sapiens GN=CHIT1 PE=1 SV=1	KOG2806	3e-79	Chitinase	ko00520	Amino sugar and nucleotide sugar metabolism	1	K01183	E3.2.1.14	chitinase	GO:0005576;GO:0005615;GO:0005764;GO:0008061;GO:0004568;GO:0008843;GO:0006032;GO:0006955;GO:0000272;GO:0009617	extracellular region|extracellular space|lysosome|chitin binding|chitinase activity|endochitinase activity|chitin catabolic process|immune response|polysaccharide catabolic process|response to bacterium
comp126022_c0_seq1	3613.32	107.48	7119.15	66.2368	6.04956	0.0324612	1	Up	2.3485	79.3986	2067	gi|743692758|gb|AJC52502.1|estrogen sulfotransferase [Scylla olivacea]	1e-73	sp|O75897|ST1C4_HUMAN	1e-41	Sulfotransferase 1C4 OS=Homo sapiens GN=SULT1C4 PE=1 SV=2	KOG1584	2e-42	Sulfotransferase
comp126043_c0_seq2	263.751	1.41421	526.087	372	8.53916	0.0166447	1	Up	0.0585098	9.14103	1326
comp126065_c0_seq1	145.664	0	291.328	Inf	Inf	0.0202296	1	Up	0	13.7349	488
comp126065_c2_seq2	299.106	0	598.212	Inf	Inf	0.0047408	0.541981	Up	0	14.4577	953
comp126093_c0_seq1	4455.13	7.77817	8902.47	1144.55	10.1606	0.0024541	0.40618	Up	0.242569	146.267	1403
comp126116_c1_seq19	376.181	749.533	2.82843	0.00377358	-8.04985	0.0158325	1	Down	11.7623	0.0217578	2871	gi|861615655|gb|KMQ86167.1|gag-pol polyprotein [Lasius niger]	9e-38	sp|P10978|POLX_TOBAC	2e-19	Retrovirus-related Pol polyprotein from transposon TNT 1-94 OS=Nicotiana tabacum PE=2 SV=1	KOG0017	4e-28	FOG: Transposon-encoded proteins with TYA, reverse transcriptase, integrase domains in various combinations							GO:0004190;GO:0004519;GO:0003676;GO:0003964;GO:0008270;GO:0015074	aspartic-type endopeptidase activity|endonuclease activity|nucleic acid binding|RNA-directed DNA polymerase activity|zinc ion binding|DNA integration
comp126132_c0_seq3	372.645	0	745.291	Inf	Inf	0.0029321	0.432821	Up	0	30.3809	566
comp126178_c0_seq1	111.016	222.032	0	0	#NAME?	0.0491365	1	Down	7.68761	0	1299
comp126237_c1_seq3	1507.91	33.234	2982.58	89.7447	6.48775	0.0191583	1	Up	1.43014	65.6624	1047
comp126238_c0_seq7	141.421	1.41421	281.428	199	7.63662	0.0494567	1	Up	0.059555	6.30538	1027
comp126247_c0_seq2	113.137	226.274	0	0	#NAME?	0.0478988	1	Down	10.5357	0	966
comp126254_c0_seq1	205.768	1.41421	410.122	290	8.17991	0.0266407	1	Up	0.0440663	7.05795	1340
comp126309_c0_seq16	119.501	239.002	0	0	#NAME?	0.0444488	1	Down	3.94699	0	2730	gi|913324147|ref|XP_013193376.1|PREDICTED: histone-lysine N-methyltransferase SETMAR-like [Amyelois transitella]	7e-14							ko00310	Lysine degradation	1	K11433	SETMAR	histone-lysine N-methyltransferase SETMAR
comp126312_c0_seq1	374.767	0	749.533	Inf	Inf	0.00289648	0.431364	Up	0	10.1107	1710	gi|1022763223|gb|KZS08860.1|L-threonine 3-dehydrogenase [Daphnia magna]	6e-133	sp|Q8K3F7|TDH_MOUSE	3e-134	L-threonine 3-dehydrogenase, mitochondrial OS=Mus musculus GN=Tdh PE=2 SV=1	KOG2774	2e-154	NAD dependent epimerase	ko00260	Glycine, serine and threonine metabolism	1	K15789	TDH	threonine 3-dehydrogenase	GO:0005739;GO:0050662;GO:0008743;GO:0019518;GO:0006567	mitochondrion|coenzyme binding|L-threonine 3-dehydrogenase activity|L-threonine catabolic process to glycine|threonine catabolic process
comp126315_c0_seq1	28741.1	26.8701	57455.3	2138.26	11.0622	0.0499529	1	Up	0.694763	753.833	1757
comp126323_c0_seq3	112.076	224.153	0	0	#NAME?	0.0485119	1	Down	4.09293	0	2467	gi|919080346|ref|XP_013421325.1|PREDICTED: uncharacterized protein LOC106181488 [Lingula anatina]	3e-14
comp126325_c0_seq2	1127.13	0	2254.26	Inf	Inf	0.000414813	0.33299	Up	0	64.3179	808
comp126334_c0_seq1	235.82	471.64	0	0	#NAME?	0.0141159	0.951994	Down	5.59557	0	3796	gi|585687138|ref|XP_006820442.1|PREDICTED: uncharacterized protein LOC102805810 [Saccoglossus kowalevskii]	2e-15
comp126360_c0_seq2	4717.46	98.2878	9336.64	94.9928	6.56975	0.0268774	1	Up	4.50967	219.186	982
comp126387_c0_seq2	489.318	8.48528	970.151	114.333	6.8371	0.0215882	1	Up	0.610772	34.7053	644
comp126389_c0_seq1	248.902	0	497.803	Inf	Inf	0.00706873	0.661287	Up	0	12.8496	894
comp126401_c0_seq1	732.916	30.4056	1435.43	47.2093	5.561	0.0417801	1	Up	0.550658	13.2058	2505
comp126428_c0_seq1	2283.6	6.36396	4560.84	716.667	9.48516	0.00242498	0.406158	Up	0.101751	35.8628	2932	gi|1009543887|ref|XP_015908089.1|PREDICTED: zinc finger protein 845-like, partial [Parasteatoda tepidariorum]	5e-21	sp|Q8BIQ3|ZNF2_MOUSE	2e-15	Zinc finger protein 2 OS=Mus musculus GN=Znf2 PE=2 SV=1	KOG1721	5e-16	FOG: Zn-finger							GO:0005634;GO:0003677;GO:0046872;GO:0003700;GO:0006355;GO:0006351	nucleus|DNA binding|metal ion binding|transcription factor activity, sequence-specific DNA binding|regulation of transcription, DNA-templated|transcription, DNA-templated
comp126454_c0_seq1	935.149	16.2635	1854.03	114	6.83289	0.015949	1	Up	1.42294	82.9892	515
comp126466_c0_seq7	230.163	0.707107	459.619	650	9.3443	0.0152705	0.995178	Up	0.0218963	6.17352	1717	gi|961102463|ref|XP_014775939.1|PREDICTED: uncharacterized protein LOC106873210 [Octopus bimaculoides]	3e-42
comp126476_c0_seq1	1448.86	43.8406	2853.88	65.0968	6.02451	0.0268372	1	Up	1.50629	50.5738	1301
comp126486_c0_seq1	305.47	609.526	1.41421	0.00232019	-8.75154	0.0159774	1	Down	5.87791	0.00873537	4672
comp126491_c0_seq2	97.5807	0	195.161	Inf	Inf	0.0369337	1	Up	0	2.54198	1775
comp126492_c0_seq1	228.395	1.41421	455.377	322	8.33092	0.021915	1	Up	0.060886	8.50339	1236
comp126499_c0_seq9	749.533	29.6985	1469.37	49.4762	5.62866	0.0395969	1	Up	0.37371	9.52446	3558	gi|914748522|gb|AKV94621.1|nicotinic acetylcholine receptor alpha2 variant A [Periplaneta americana]	3e-173	sp|P17644|ACH2_DROME	0	Acetylcholine receptor subunit alpha-like 2 OS=Drosophila melanogaster GN=nAChRalpha2 PE=2 SV=1	KOG3645	0	Acetylcholine receptor							GO:0005892;GO:0030054;GO:0045211;GO:0004889;GO:0098655;GO:0006812;GO:0007271	acetylcholine-gated channel complex|cell junction|postsynaptic membrane|acetylcholine-activated cation-selective channel activity|cation transmembrane transport|cation transport|synaptic transmission, cholinergic
comp126512_c1_seq1	212.839	0	425.678	Inf	Inf	0.00984824	0.779265	Up	0	17.8241	550
comp126518_c0_seq1	10756.2	21503.8	8.48528	0.000394594	-11.3073	0.00608586	0.610299	Down	3026.33	0.643567	320
comp126541_c0_seq2	111.369	222.739	0	0	#NAME?	0.048927	1	Down	3.3753	0	2970	gi|909821380|gb|AKU04652.1|polyprotein [Blattella germanica]	2e-17	sp|P14381|YTX2_XENLA	4e-07	Transposon TX1 uncharacterized 149 kDa protein OS=Xenopus laevis PE=3 SV=1
comp126544_c0_seq2	191.272	382.545	0	0	#NAME?	0.0210944	1	Down	44.2905	0	389
comp126546_c0_seq1	239.709	4.24264	475.176	112	6.80735	0.0411601	1	Up	0.245169	15.1458	723
comp126555_c0_seq1	9854.24	9.89949	19698.6	1989.86	10.9584	0.00574729	0.591137	Up	0.291036	288.51	1574	gi|766943030|gb|AJT34991.1|masquerade-like protein [Procambarus clarkii]	1e-107	sp|Q05319|STUB_DROME	7e-43	Serine proteinase stubble OS=Drosophila melanogaster GN=Sb PE=2 SV=2	KOG3627	3e-59	Trypsin							GO:0016021;GO:0005886;GO:0004252;GO:0051017;GO:0007010;GO:0006508;GO:0035220	integral component of membrane|plasma membrane|serine-type endopeptidase activity|actin filament bundle assembly|cytoskeleton organization|proteolysis|wing disc development
comp126566_c1_seq2	124.451	0	248.902	Inf	Inf	0.0259524	1	Up	0	4.00081	1436	gi|871222336|ref|XP_012936070.1|PREDICTED: protein O-linked-mannose beta-1,2-N-acetylglucosaminyltransferase 1-like [Aplysia californica]	4e-25	sp|Q5EAB6|PMGT1_BOVIN	5e-21	Protein O-linked-mannose beta-1,2-N-acetylglucosaminyltransferase 1 OS=Bos taurus GN=POMGNT1 PE=2 SV=1				ko00515	Mannose type O-glycan biosyntheis	1	K09666	POMGNT1	beta-1,2-N-acetylglucosaminyltransferase	GO:0000139;GO:0016021;GO:0008375;GO:0006486	Golgi membrane|integral component of membrane|acetylglucosaminyltransferase activity|protein glycosylation
comp126567_c0_seq5	456.084	0	912.168	Inf	Inf	0.00191568	0.378845	Up	0	27.1483	774
comp126579_c0_seq1	288.146	3.53553	572.756	162	7.33985	0.0260368	1	Up	0.0364174	2.9492	4473	gi|1022775065|gb|KZS19004.1|Uncharacterized protein APZ42_014696 [Daphnia magna]	0	sp|A4IGL7|PXDN_XENTR	4e-109	Peroxidasin OS=Xenopus tropicalis GN=pxdn PE=2 SV=1	KOG2408	1e-159	Peroxidase/oxygenase							GO:0005576;GO:0020037;GO:0046872;GO:0004601;GO:0042744;GO:0006979	extracellular region|heme binding|metal ion binding|peroxidase activity|hydrogen peroxide catabolic process|response to oxidative stress
comp126582_c0_seq1	150.614	0	301.227	Inf	Inf	0.0191299	1	Up	0	5.0271	1381
comp126585_c0_seq1	21235.8	5.65685	42466	7507	12.874	0.0135979	0.931145	Up	0.122066	459.386	2131
comp126601_c0_seq1	1507.55	1.41421	3013.69	2131	11.0573	0.000948856	0.33299	Up	0.0255144	30.9668	2243	gi|237847769|gb|ACR23316.1|beta-N-acetylglucosaminidase [Litopenaeus vannamei]	0	sp|P49010|HEXC_BOMMO	6e-180	Chitooligosaccharidolytic beta-N-acetylglucosaminidase OS=Bombyx mori PE=1 SV=1	KOG2499	5e-172	Beta-N-acetylhexosaminidase	ko04142;ko00520;ko00511;ko00513;ko00531;ko00603;ko00604	Lysosome|Amino sugar and nucleotide sugar metabolism|Other glycan degradation|Various types of N-glycan biosynthesis|Glycosaminoglycan degradation|Glycosphingolipid biosynthesis - globo and isoglobo series|Glycosphingolipid biosynthesis - ganglio series	7	K12373	HEXA_B	hexosaminidase	GO:0004563;GO:0006032;GO:0000272	beta-N-acetylhexosaminidase activity|chitin catabolic process|polysaccharide catabolic process
comp126606_c0_seq4	1011.87	8.48528	2015.25	237.5	7.89178	0.00745122	0.682164	Up	0.828678	99.0375	469
comp126607_c1_seq2	1089.3	2178.6	0	0	#NAME?	0.000911598	0.33299	Down	59.7109	0	1643	gi|123469424|ref|XP_001317924.1|hypothetical protein [Trichomonas vaginalis G3]	3e-13
comp126609_c0_seq1	277.893	554.372	1.41421	0.00255102	-8.61471	0.0191198	1	Down	21.3082	0.0317231	1171
comp126614_c0_seq4	543.412	7.77817	1079.04	138.727	7.11611	0.0168391	1	Up	0.415226	30.8733	806
comp126628_c0_seq1	10518.9	21027.9	9.89949	0.000470778	-11.0527	0.00654295	0.633438	Down	498.933	0.116904	1898
comp126662_c0_seq1	634.982	5.65685	1264.31	223.5	7.80413	0.00982653	0.779174	Up	0.525139	58.0295	502
comp126667_c0_seq1	13989.8	3.53553	27976	7912.8	12.95	0.00493962	0.547995	Up	0.0867617	373.436	1727	gi|75022291|sp|Q9GV46.1|LUCB_OPLGRRecName: Full=Oplophorus-luciferin 2-monooxygenase non-catalytic subunit; Flags: Precursor	5e-47	sp|Q9GV46|LUCB_OPLGR	5e-54	Oplophorus-luciferin 2-monooxygenase non-catalytic subunit OS=Oplophorus gracilirostris PE=1 SV=1	KOG0619	8e-14	FOG: Leucine rich repeat							GO:0005576	extracellular region
comp126671_c0_seq1	1566.95	1.41421	3132.48	2215	11.1131	0.000911756	0.33299	Up	0.0864566	96.6614	747
comp126672_c0_seq1	3369.72	6.36396	6733.07	1058	10.0471	0.00204631	0.383236	Up	0.0942338	49.1374	3159	gi|1009600134|ref|XP_015928372.1|PREDICTED: alpha-tocopherol transfer protein-like isoform X5 [Parasteatoda tepidariorum]	5e-67	sp|Q9D3D0|TTPAL_MOUSE	4e-57	Alpha-tocopherol transfer protein-like OS=Mus musculus GN=Ttpal PE=1 SV=3	KOG1471	3e-48	Phosphatidylinositol transfer protein SEC14 and related proteins							GO:0005622;GO:0016020;GO:0005215	intracellular|membrane|transporter activity
comp126717_c2_seq1	814.233	1617.15	11.3137	0.00699606	-7.15924	0.0140402	0.950269	Down	109.838	0.403287	663
comp126727_c0_seq1	643.467	1274.21	12.7279	0.0099889	-6.64546	0.0218928	1	Down	47.0708	0.23376	1219
comp126739_c0_seq6	1421.28	2.82843	2839.74	1004	9.97154	0.00175494	0.375796	Up	0.0737345	37.7811	1733
comp126744_c0_seq1	5258.05	7.07107	10509	1486.2	10.5374	0.00238807	0.406158	Up	0.177084	141.269	1715
comp126748_c0_seq1	1839.54	3673.42	5.65685	0.00153994	-9.34291	0.00285785	0.428983	Down	87.4343	0.069305	1892
comp126749_c0_seq1	11931.7	23857.8	5.65685	0.000237107	-12.0422	0.00543759	0.574074	Down	575.48	0.063487	1867
comp126753_c0_seq8	9242.95	18477.4	8.48528	0.000459225	-11.0885	0.00498824	0.548013	Down	593.947	0.132051	1401
comp126761_c0_seq1	208.597	0	417.193	Inf	Inf	0.0102718	0.803632	Up	0	4.82388	1997	gi|999972974|gb|KXJ12148.1|hypothetical protein AC249_AIPGENE28615 [Exaiptasia pallida]	7e-06
comp126765_c0_seq3	493.914	980.757	7.07107	0.00720981	-7.11582	0.0195058	1	Down	33.9896	0.134909	1299
comp126774_c1_seq2	132.229	0	264.458	Inf	Inf	0.0236339	1	Up	0	9.13019	669
comp126782_c1_seq1	826.608	0	1653.22	Inf	Inf	0.000652058	0.33299	Up	0	36.5609	1042
comp126783_c1_seq1	84.1457	0	168.291	Inf	Inf	0.0447782	1	Up	0	4.21877	923
comp126784_c0_seq4	132.229	264.458	0	0	#NAME?	0.0385398	1	Down	2.42781	0	4912	gi|195109771|ref|XP_001999455.1|uncharacterized protein Dmoj_GI24519, isoform A [Drosophila mojavensis]	3e-114	sp|Q24400|MLP2_DROME	4e-106	Muscle LIM protein Mlp84B OS=Drosophila melanogaster GN=Mlp84B PE=1 SV=1	KOG1700	9e-107	Regulatory protein MLP and related LIM proteins							GO:0005634;GO:0030018;GO:0008307;GO:0008270;GO:0007517;GO:0060537;GO:0090175;GO:0045214	nucleus|Z disc|structural constituent of muscle|zinc ion binding|muscle organ development|muscle tissue development|regulation of establishment of planar polarity|sarcomere organization
comp126788_c0_seq3	304.409	4.94975	603.869	122	6.93074	0.0305432	1	Up	0.195085	11.9705	1163
comp126794_c0_seq1	1085.76	21.9203	2149.6	98.0645	6.61566	0.0179899	1	Up	0.999841	49.9909	991
comp126801_c0_seq1	103.238	0	206.475	Inf	Inf	0.0341531	1	Up	0	3.78288	1261
comp126804_c0_seq3	105.359	0	210.718	Inf	Inf	0.0331818	1	Up	0	8.22218	592
comp126815_c0_seq1	134.35	0	268.701	Inf	Inf	0.0230501	1	Up	0	3.62542	1708
comp126823_c1_seq4	1155.41	0	2310.82	Inf	Inf	0.000401514	0.33299	Up	0	36.8352	1446
comp126831_c0_seq3	287.792	5.65685	569.928	100.75	6.65464	0.0374186	1	Up	0.0692445	3.70551	3545	gi|1022766972|gb|KZS11905.1|Ca-activated Cl channel protein [Daphnia magna]	7e-47	sp|P54281|ECLC_BOVIN	1e-26	Epithelial chloride channel protein OS=Bos taurus PE=2 SV=1										GO:0034707;GO:0005262;GO:0005254;GO:0005244	chloride channel complex|calcium channel activity|chloride channel activity|voltage-gated ion channel activity
comp126832_c0_seq7	84.1457	0	168.291	Inf	Inf	0.0447782	1	Up	0	3.45239	1121
comp126835_c1_seq1	79.196	0	158.392	Inf	Inf	0.0481921	1	Up	0	6.49781	564
comp126849_c0_seq2	1083.29	0	2166.58	Inf	Inf	0.000437522	0.33299	Up	0	27.9155	1789
comp126863_c0_seq2	402.697	2.12132	803.273	378.667	8.56478	0.00954441	0.768051	Up	0.0916159	21.2538	872
comp126865_c0_seq2	793.374	2.82843	1583.92	560	9.12928	0.00377722	0.48945	Up	0.13001	34.2209	1067
comp126877_c0_seq1	363.453	725.492	1.41421	0.00194932	-9.00282	0.0114654	0.849586	Down	53.917	0.0721394	606
comp126880_c0_seq1	180.312	0	360.624	Inf	Inf	0.0137927	0.940233	Up	0	8.61111	966
comp126954_c0_seq1	739.987	1474.32	5.65685	0.00383693	-8.02583	0.00865452	0.733059	Down	89.3675	0.172282	743
comp126957_c0_seq3	125.158	250.316	0	0	#NAME?	0.041676	1	Down	8.68004	0	1297	gi|154418773|ref|XP_001582404.1|viral A-type inclusion protein [Trichomonas vaginalis G3]	1e-13
comp126989_c0_seq3	149.2	1.41421	296.985	210	7.71425	0.0457241	1	Up	0.141112	15.5237	441
comp126990_c0_seq6	2390.02	4.24264	4775.8	1125.67	10.1366	0.00160975	0.365346	Up	0.156894	98.3816	1119
comp127002_c0_seq4	110.309	0	220.617	Inf	Inf	0.0310575	1	Up	0	3.20819	1583	gi|926636883|ref|XP_013784393.1|PREDICTED: probable glutamate receptor, partial [Limulus polyphemus]	1e-22	sp|P26591|GLRK_LYMST	1e-13	Glutamate receptor OS=Lymnaea stagnalis PE=2 SV=1	KOG1052	2e-12	Glutamate-gated kainate-type ion channel receptor subunit GluR5 and related subunits							GO:0030054;GO:0016021;GO:0045211;GO:0005234;GO:0004970	cell junction|integral component of membrane|postsynaptic membrane|extracellular-glutamate-gated ion channel activity|ionotropic glutamate receptor activity
comp127008_c0_seq1	328.805	0	657.609	Inf	Inf	0.00385068	0.496423	Up	0	12.1007	1253
comp127015_c0_seq1	4588.42	1.41421	9175.42	6488	12.6636	0.000636647	0.33299	Up	0.0482955	195.319	1083
comp127024_c2_seq1	361.332	1.41421	721.249	510	8.99435	0.00893514	0.74349	Up	0.0582371	14.9242	1113
comp127036_c0_seq1	146.371	0	292.742	Inf	Inf	0.020068	1	Up	0	4.97638	1357
comp127061_c0_seq2	135.765	0	271.529	Inf	Inf	0.0226713	1	Up	0	3.02511	2073
comp127076_c2_seq5	1400.07	1.41421	2798.73	1979	10.9506	0.00102807	0.334472	Up	0.144013	158.942	406
comp127080_c0_seq1	4917.22	11.3137	9823.13	868.25	9.76197	0.00352531	0.474658	Up	0.188218	84.8097	2670	gi|939681458|ref|XP_014285769.1|PREDICTED: uncharacterized protein LOC106686778, partial [Halyomorpha halys]	7e-123	sp|Q9VZZ4|PXDN_DROME	2e-94	Peroxidasin OS=Drosophila melanogaster GN=Pxn PE=1 SV=1	KOG2408	8e-125	Peroxidase/oxygenase							GO:0005578;GO:0020037;GO:0046872;GO:0004601;GO:0030198;GO:0042744;GO:0006909;GO:0006979	proteinaceous extracellular matrix|heme binding|metal ion binding|peroxidase activity|extracellular matrix organization|hydrogen peroxide catabolic process|phagocytosis|response to oxidative stress
comp127100_c1_seq4	3676.6	7350.37	2.82843	0.0003848	-11.3436	0.00119685	0.34072	Down	188.089	0.0306097	1760	gi|225718478|gb|ACO15085.1|DnaJ homolog subfamily C member 7 [Caligus clemensi]	2e-08	sp|Q82EX7|DNAJ1_STRAW	2e-06	Chaperone protein DnaJ 1 OS=Streptomyces avermitilis (strain ATCC 31267 / DSM 46492 / JCM 5070 / NBRC 14893 / NCIMB 12804 / NRRL 8165 / MA-4680) GN=dnaJ1 PE=3 SV=1										GO:0005737;GO:0005524;GO:0008270;GO:0006260;GO:0006457;GO:0009408	cytoplasm|ATP binding|zinc ion binding|DNA replication|protein folding|response to heat
comp127102_c0_seq1	3313.5	16.9706	6610.03	389.5	8.60548	0.00528303	0.565507	Up	0.426179	86.2827	1766
comp127106_c1_seq1	198.343	2.12132	394.566	186	7.53916	0.0359986	1	Up	0.233623	25.1456	362
comp127132_c0_seq1	197.283	0	394.566	Inf	Inf	0.0115256	0.850635	Up	0	8.33917	1090
comp127148_c0_seq1	1241.68	0	2483.36	Inf	Inf	0.000366401	0.33299	Up	0	62.0136	923
comp127149_c1_seq1	4652.06	9299.87	4.24264	0.000456204	-11.098	0.0016582	0.369283	Down	189.853	0.0384709	2206	gi|678325200|emb|CDW81805.1|tpr domain containing protein [Stylonychia lemnae]	2e-08	sp|O84345|DNAJ_CHLTR	9e-07	Chaperone protein DnaJ OS=Chlamydia trachomatis (strain D/UW-3/Cx) GN=dnaJ PE=3 SV=1										GO:0005737;GO:0005524;GO:0008270;GO:0006260;GO:0006457;GO:0009408	cytoplasm|ATP binding|zinc ion binding|DNA replication|protein folding|response to heat
comp127150_c0_seq4	214.607	427.8	1.41421	0.00330579	-8.24079	0.0307216	1	Down	4.0262	0.00614038	4785	gi|646696810|gb|KDR08850.1|hypothetical protein L798_01336 [Zootermopsis nevadensis]	9e-24
comp127154_c0_seq2	173.595	0.707107	346.482	490	8.93664	0.026094	1	Up	0.00994407	2.46339	3238	gi|943979469|ref|XP_014370596.1|PREDICTED: glycine receptor subunit alpha-4-like [Papilio machaon]	3e-11	sp|G5ECJ0|GBR1_CAEEL	1e-07	Gamma-aminobutyric acid receptor exp-1 OS=Caenorhabditis elegans GN=exp-1 PE=1 SV=1	KOG3644	1e-08	Ligand-gated ion channel							GO:0030054;GO:0005887;GO:0031594;GO:0043005;GO:0005254;GO:0005231;GO:0016917;GO:0005237;GO:1902476;GO:0030421;GO:0007214;GO:0050877;GO:0045933;GO:0006813;GO:0042391;GO:0042493;GO:0006814;GO:0007268	cell junction|integral component of plasma membrane|neuromuscular junction|neuron projection|chloride channel activity|excitatory extracellular ligand-gated ion channel activity|GABA receptor activity|inhibitory extracellular ligand-gated ion channel activity|chloride transmembrane transport|defecation|gamma-aminobutyric acid signaling pathway|neurological system process|positive regulation of mu…
comp127161_c0_seq4	516.895	1.41421	1032.38	730	9.51175	0.00451019	0.530063	Up	0.0424384	20.6401	1153
comp127162_c0_seq1	1150.82	7.77817	2293.85	294.909	8.20413	0.00580416	0.59537	Up	0.327762	50.0866	1056
comp127173_c0_seq1	82.7315	0	165.463	Inf	Inf	0.0457209	1	Up	0	3.0493	1247	gi|328706028|ref|XP_003242975.1|PREDICTED: tigger transposable element-derived protein 7-like [Acyrthosiphon pisum]	3e-06
comp127199_c0_seq1	804.334	1608.67	0	0	#NAME?	0.0014112	0.345759	Down	72.5249	0	999
comp127206_c0_seq1	89.8026	0	179.605	Inf	Inf	0.0412442	1	Up	0	4.61537	899
comp127207_c0_seq10	158.392	0	316.784	Inf	Inf	0.0175392	1	Up	0	5.14563	1421
comp127208_c0_seq5	1079.04	15.5563	2142.53	137.727	7.10567	0.0126976	0.902935	Up	0.782858	54.0245	914
comp127220_c0_seq1	114.551	0	229.103	Inf	Inf	0.0293855	1	Up	0	3.7543	1408
comp127235_c0_seq1	27425.1	8.48528	54841.8	6463.17	12.658	0.0281157	1	Up	0.325845	1078.7	1172	gi|1009546070|ref|XP_015908997.1|PREDICTED: anaphase-promoting complex subunit 10-like [Parasteatoda tepidariorum]	4e-35	sp|Q9V831|APC10_DROME	1e-37	Anaphase-promoting complex subunit 10 OS=Drosophila melanogaster GN=APC10 PE=2 SV=2	KOG3437	3e-38	Anaphase-promoting complex (APC), subunit 10	ko04110;ko04111;ko04113;ko04114;ko04120;ko05166;ko04914	Cell cycle|Cell cycle - yeast|Meiosis - yeast|Oocyte meiosis|Ubiquitin mediated proteolysis|HTLV-I infection|Progesterone-mediated oocyte maturation	7	K03357	APC10, DOC1	anaphase-promoting complex subunit 10	GO:0005680;GO:0090302;GO:0031145;GO:0051301;GO:0007113;GO:0007067;GO:0022008;GO:0045842	anaphase-promoting complex|APC-Cdc20 complex activity|anaphase-promoting complex-dependent proteasomal ubiquitin-dependent protein catabolic process|cell division|endomitotic cell cycle|mitotic nuclear division|neurogenesis|positive regulation of mitotic metaphase/anaphase transition
comp127242_c0_seq1	20578.9	41140.9	16.9706	0.000412499	-11.2433	0.0229607	1	Down	838.357	0.18355	2210	gi|906460439|gb|KNC23186.1|hypothetical protein FF38_02239, partial [Lucilia cuprina]	2e-26	sp|Q8VDJ3|VIGLN_MOUSE	3e-19	Vigilin OS=Mus musculus GN=Hdlbp PE=1 SV=1	KOG2208	1e-22	Vigilin							GO:0005737;GO:0034364;GO:0005634;GO:0044822;GO:0008203;GO:0006869	cytoplasm|high-density lipoprotein particle|nucleus|poly(A) RNA binding|cholesterol metabolic process|lipid transport
comp127253_c0_seq1	785.242	6.36396	1564.12	245.778	7.94121	0.00798378	0.697237	Up	0.160572	19.4605	1853	gi|646722569|gb|KDR23527.1|SET and MYND domain-containing protein 4 [Zootermopsis nevadensis]	2e-08	sp|Q5R5X9|SMYD4_PONAB	6e-06	SET and MYND domain-containing protein 4 OS=Pongo abelii GN=SMYD4 PE=2 SV=1	KOG2084	3e-06	Predicted histone tail methylase containing SET domain							GO:0046872;GO:0008168	metal ion binding|methyltransferase activity
comp127260_c1_seq1	676.701	0	1353.4	Inf	Inf	0.000909275	0.33299	Up	0	24.6906	1263
comp127263_c0_seq5	202.94	0	405.879	Inf	Inf	0.0108752	0.82481	Up	0	7.2017	1297
comp127276_c0_seq1	5160.11	133.643	10186.6	76.2222	6.25214	0.0353151	1	Up	1.30004	50.7943	4623	gi|925169581|gb|ALC78853.1|adenosine monophosphate deaminase 2, partial [Litopenaeus vannamei]	0	sp|Q9DBT5|AMPD2_MOUSE	0	AMP deaminase 2 OS=Mus musculus GN=Ampd2 PE=1 SV=1	KOG1096	0	Adenosine monophosphate deaminase	ko00230	Purine metabolism	1	K01490	AMPD	AMP deaminase	GO:0003876;GO:0046872;GO:0046033;GO:0046034;GO:0052652;GO:0097009;GO:0046039;GO:0006188;GO:0032264;GO:0009117	AMP deaminase activity|metal ion binding|AMP metabolic process|ATP metabolic process|cyclic purine nucleotide metabolic process|energy homeostasis|GTP metabolic process|IMP biosynthetic process|IMP salvage|nucleotide metabolic process
comp127284_c0_seq1	314.663	0	629.325	Inf	Inf	0.00424095	0.513548	Up	0	12.7489	1137
comp127297_c0_seq5	183.141	1.41421	364.867	258	8.01123	0.0328397	1	Up	0.126042	15.4108	546
comp127309_c0_seq1	1071.62	53.033	2090.21	39.4133	5.30061	0.0462657	1	Up	0.732338	14.8703	3240	gi|952521684|gb|KRT81761.1|hypothetical protein AMK59_5342 [Oryctes borbonicus]	4e-97	sp|Q6ZNB7|ALKMO_HUMAN	2e-97	Alkylglycerol monooxygenase OS=Homo sapiens GN=AGMO PE=1 SV=1	KOG0872	2e-67	Sterol C5 desaturase							GO:0005783;GO:0005789;GO:0016021;GO:0050479;GO:0005506;GO:0046485;GO:0006633;GO:0006643	endoplasmic reticulum|endoplasmic reticulum membrane|integral component of membrane|glyceryl-ether monooxygenase activity|iron ion binding|ether lipid metabolic process|fatty acid biosynthetic process|membrane lipid metabolic process
comp127320_c0_seq1	281.428	0	562.857	Inf	Inf	0.00541809	0.573897	Up	0	6.73476	1927
comp127332_c0_seq9	282.489	563.564	1.41421	0.00250941	-8.63844	0.0185369	1	Down	10.424	0.0164927	2435
comp127356_c0_seq1	2707.87	51.6188	5364.11	103.918	6.6993	0.0181837	1	Up	0.610704	32.6803	3784
comp127379_c0_seq1	4935.96	3.53553	9868.38	2791.2	11.4467	0.00129601	0.34072	Up	0.14245	219.156	1038	gi|1022768619|gb|KZS13318.1|Anaphase-promoting complex subunit 10 [Daphnia magna]	3e-36	sp|Q9V831|APC10_DROME	5e-42	Anaphase-promoting complex subunit 10 OS=Drosophila melanogaster GN=APC10 PE=2 SV=2	KOG3437	1e-42	Anaphase-promoting complex (APC), subunit 10	ko04110;ko04111;ko04113;ko04114;ko04120;ko05166;ko04914	Cell cycle|Cell cycle - yeast|Meiosis - yeast|Oocyte meiosis|Ubiquitin mediated proteolysis|HTLV-I infection|Progesterone-mediated oocyte maturation	7	K03357	APC10, DOC1	anaphase-promoting complex subunit 10	GO:0005680;GO:0090302;GO:0031145;GO:0051301;GO:0007113;GO:0007067;GO:0022008;GO:0045842	anaphase-promoting complex|APC-Cdc20 complex activity|anaphase-promoting complex-dependent proteasomal ubiquitin-dependent protein catabolic process|cell division|endomitotic cell cycle|mitotic nuclear division|neurogenesis|positive regulation of mitotic metaphase/anaphase transition
comp127383_c0_seq2	335.522	7.77817	663.266	85.2727	6.41401	0.0373714	1	Up	0.211052	9.31337	1641
comp127394_c0_seq2	5801.46	53.033	11549.9	217.787	7.76677	0.0150272	0.991385	Up	1.49998	167.243	1592	gi|985525225|gb|AMD09631.1|glutamine synthetase [Penaeus monodon]	0	sp|Q04831|GLNA_PANAR	0	Glutamine synthetase OS=Panulirus argus PE=2 SV=1	KOG0683	0	Glutamine synthetase	ko02020;ko00220;ko00250;ko00630;ko00910;ko01230;ko04724;ko04727	Two-component system|Arginine biosynthesis|Alanine, aspartate and glutamate metabolism|Glyoxylate and dicarboxylate metabolism|Nitrogen metabolism|Biosynthesis of amino acids|Glutamatergic synapse|GABAergic synapse	8	K01915	glnA, GLUL	glutamine synthetase	GO:0005737;GO:0005524;GO:0004356;GO:0006542	cytoplasm|ATP binding|glutamate-ammonia ligase activity|glutamine biosynthetic process
comp127397_c0_seq1	7364.52	35.3553	14693.7	415.6	8.69905	0.0116072	0.852821	Up	0.680989	145.812	2323	gi|675388504|gb|KFM81401.1|Pancreatic lipase-related protein 1, partial [Stegodyphus mimosarum]	2e-54	sp|P54318|LIPR2_RAT	3e-44	Pancreatic lipase-related protein 2 OS=Rattus norvegicus GN=Pnliprp2 PE=1 SV=1				ko00561;ko04972;ko04975	Glycerolipid metabolism|Pancreatic secretion|Fat digestion and absorption	3	K14074	PNLIPRP1, PLRP1	pancreatic lipase-related protein 1	GO:0005615;GO:0042589;GO:0047372;GO:0005509;GO:0047714;GO:0016298;GO:0004620;GO:0004806;GO:0019376;GO:0009395;GO:0009791;GO:0032094;GO:0051384;GO:0033993;GO:0043434	extracellular space|zymogen granule membrane|acylglycerol lipase activity|calcium ion binding|galactolipase activity|lipase activity|phospholipase activity|triglyceride lipase activity|galactolipid catabolic process|phospholipid catabolic process|post-embryonic development|response to food|response to glucocorticoid|response to lipid|response to peptide hormone
comp127428_c0_seq1	1575.08	62.9325	3087.23	49.0562	5.61636	0.0361005	1	Up	3.40981	85.8679	829
comp127437_c0_seq1	1082.58	35.3553	2129.81	60.24	5.91265	0.0298103	1	Up	0.754679	23.362	2102	gi|926626800|ref|XP_013778951.1|PREDICTED: lipoma HMGIC fusion partner-like 3 protein [Limulus polyphemus]	2e-67	sp|Q86UP9|LHPL3_HUMAN	2e-41	Lipoma HMGIC fusion partner-like 3 protein OS=Homo sapiens GN=LHFPL3 PE=2 SV=3	KOG4026	3e-53	Uncharacterized conserved protein							GO:0016021	integral component of membrane
comp127438_c0_seq2	1119	2.12132	2235.87	1054	10.0417	0.0018371	0.378845	Up	0.0819808	50.4362	1022
comp127449_c0_seq1	138.946	277.893	0	0	#NAME?	0.035849	1	Down	5.88579	0	2128
comp127450_c0_seq2	232.638	0	465.276	Inf	Inf	0.00816051	0.705358	Up	0	11.5915	926
comp127461_c0_seq1	1492.7	12.7279	2972.68	233.556	7.86762	0.0070836	0.661287	Up	0.381567	46.7182	1467
comp127462_c0_seq1	132.583	0.707107	264.458	374	8.54689	0.0400951	1	Up	0.0159666	2.61621	2327
comp127473_c0_seq12	342.947	2.82843	683.065	241.5	7.91588	0.0159721	1	Up	0.101769	13.3055	1183
comp127475_c0_seq3	123.037	0	246.073	Inf	Inf	0.0264071	1	Up	0	3.95013	1436
comp127512_c0_seq1	1624.22	3247.03	1.41421	0.00043554	-11.1649	0.00119929	0.34072	Down	95.6349	0.0188465	1529
comp127520_c0_seq2	294.864	585.484	4.24264	0.00724638	-7.10852	0.0320273	1	Down	11.0055	0.0448273	2395	gi|498949549|ref|XP_004522870.1|PREDICTED: glycine receptor subunit alpha-2 isoform X1 [Ceratitis capitata]	1e-37	sp|P23416|GLRA2_HUMAN	5e-34	Glycine receptor subunit alpha-2 OS=Homo sapiens GN=GLRA2 PE=2 SV=1	KOG3644	1e-34	Ligand-gated ion channel							GO:0030054;GO:0034707;GO:0005887;GO:0043005;GO:0005886;GO:0045211;GO:0045202;GO:0016934;GO:0016594;GO:0022824;GO:1902476;GO:0034220;GO:0006811;GO:0050877;GO:0007218;GO:0042391;GO:0043200;GO:0060012;GO:0055085	cell junction|chloride channel complex|integral component of plasma membrane|neuron projection|plasma membrane|postsynaptic membrane|synapse|extracellular-glycine-gated chloride channel activity|glycine binding|transmitter-gated ion channel activity|chloride transmembrane transport|ion transmembrane transport|ion transport|neurological system process|neuropeptide signaling pathway|regulation of m…
comp127547_c0_seq1	386.787	12.7279	760.847	59.7778	5.90154	0.0455365	1	Up	0.434772	13.1699	1332
comp127551_c0_seq1	1717.56	48.0833	3387.04	70.4412	6.13835	0.0248157	1	Up	0.488693	17.5218	4456
comp127553_c0_seq1	120.915	0	241.831	Inf	Inf	0.0271101	1	Up	0	7.52877	740
comp127555_c0_seq1	116.673	233.345	0	0	#NAME?	0.0459357	1	Down	4.69512	0	2235	gi|225709402|gb|ACO10547.1|Leukocyte receptor cluster member 9 [Caligus rogercresseyi]	1e-73	sp|Q8BTN6|LENG9_MOUSE	4e-29	Leukocyte receptor cluster member 9 OS=Mus musculus GN=Leng9 PE=2 SV=1										GO:0046872;GO:0098779;GO:0002230	metal ion binding|mitophagy in response to mitochondrial depolarization|positive regulation of defense response to virus by host
comp127557_c0_seq2	16076.4	3.53553	32149.3	9093.2	13.1506	0.00644459	0.627119	Up	0.104337	523.775	1415
comp127583_c0_seq1	596.445	7.77817	1185.11	152.364	7.25137	0.0145577	0.968013	Up	0.288319	22.7233	1203	gi|919091294|ref|XP_013382645.1|PREDICTED: uncharacterized protein LOC106153310 [Lingula anatina]	2e-17				KOG0017	4e-06	FOG: Transposon-encoded proteins with TYA, reverse transcriptase, integrase domains in various combinations
comp127590_c1_seq3	5180.62	10357	4.24264	0.00040964	-11.2534	0.00173868	0.374428	Down	898.709	0.219045	519
comp127599_c0_seq1	2716.7	0	5433.41	Inf	Inf	0.000196435	0.33299	Up	0	66.5847	1881
comp127619_c0_seq2	6418.76	142.128	12695.4	89.3234	6.48097	0.0368551	1	Up	1.39715	63.8421	4584
comp127655_c1_seq2	1541.14	10.6066	3071.67	289.6	8.17792	0.00568271	0.586883	Up	0.276094	40.051	1768
comp127665_c0_seq1	174.655	0	349.311	Inf	Inf	0.014665	0.974289	Up	0	7.67319	1050
comp127673_c0_seq2	553.311	1102.38	4.24264	0.00384862	-8.02144	0.0107611	0.82481	Down	27.2556	0.0589782	1821	gi|1009604786|ref|XP_015930310.1|PREDICTED: putative exonuclease GOR [Parasteatoda tepidariorum]	6e-27	sp|Q8IX06|GOR_HUMAN	9e-25	Putative exonuclease GOR OS=Homo sapiens GN=REXO1L1P PE=5 SV=2	KOG2248	2e-26	3'-5' exonuclease	ko03008	Ribosome biogenesis in eukaryotes	1	K14570	REX1, REXO1, RNH70	RNA exonuclease 1	GO:0005737;GO:0005634;GO:0004527;GO:0003676	cytoplasm|nucleus|exonuclease activity|nucleic acid binding
comp127676_c2_seq5	808.223	0	1616.45	Inf	Inf	0.000675912	0.33299	Up	0	14.4945	2571
comp127685_c0_seq1	425.325	850.649	0	0	#NAME?	0.00432007	0.517143	Down	23.5392	0	1627
comp127703_c0_seq5	2446.59	125.865	4767.31	37.8764	5.24323	0.0497887	1	Up	2.27663	44.0653	2494
comp127762_c0_seq4	1479.27	26.8701	2931.66	109.105	6.76958	0.0156134	1	Up	2.05747	114.574	590
comp127772_c0_seq13	102.53	0	205.061	Inf	Inf	0.0344852	1	Up	0	4.17906	1129
comp127815_c0_seq2	5661.45	7.77817	11315.1	1454.73	10.5065	0.00270027	0.420164	Up	0.127222	92.6899	2814
comp127820_c2_seq4	628.618	1257.24	0	0	#NAME?	0.00210547	0.388806	Down	147.092	0	385
comp127822_c0_seq12	296.278	0	592.555	Inf	Inf	0.00484074	0.546867	Up	0	14.567	938
comp127838_c1_seq5	737.866	0.707107	1475.02	2086	11.0265	0.00161486	0.365412	Up	0.023493	18.2486	1863
comp127855_c1_seq1	4639.33	9275.83	2.82843	0.000304925	-11.6793	0.00125071	0.34072	Down	360.417	0.0505202	1159	gi|342180753|emb|CCC90229.1|unnamed protein product [Trypanosoma congolense IL3000]	2e-17				KOG0994	1e-06	Extracellular matrix glycoprotein Laminin subunit beta
comp127857_c0_seq14	191.272	0.707107	381.838	540	9.07682	0.0218716	1	Up	0.0287968	5.57085	1580
comp127864_c0_seq2	80.6102	0	161.22	Inf	Inf	0.0471834	1	Up	0	3.26411	1141
comp127869_c0_seq6	236.881	0	473.762	Inf	Inf	0.0078534	0.690625	Up	0	6.03559	1809
comp127880_c0_seq6	557.907	0	1115.81	Inf	Inf	0.00128654	0.34072	Up	0	21.9094	1174
comp127897_c0_seq1	4527.96	3.53553	9052.38	2560.4	11.3222	0.0012485	0.34072	Up	0.170672	207.641	1005	gi|913317271|ref|XP_013189614.1|PREDICTED: chromobox protein homolog 1-like [Amyelois transitella]	5e-39	sp|P45973|CBX5_HUMAN	7e-40	Chromobox protein homolog 5 OS=Homo sapiens GN=CBX5 PE=1 SV=1	KOG1911	2e-40	Heterochromatin-associated protein HP1 and related CHROMO domain proteins							GO:0010369;GO:0000118;GO:0035097;GO:0000776;GO:0000784;GO:0005635;GO:0005720;GO:0031618;GO:0005730;GO:0005654;GO:0005634;GO:0017053;GO:0003682;GO:0035064;GO:0030674;GO:0070491;GO:0007596;GO:0045892;GO:0016032	chromocenter|histone deacetylase complex|histone methyltransferase complex|kinetochore|nuclear chromosome, telomeric region|nuclear envelope|nuclear heterochromatin|nuclear pericentric heterochromatin|nucleolus|nucleoplasm|nucleus|transcriptional repressor complex|chromatin binding|methylated histone binding|protein binding, bridging|repressing transcription factor binding|blood coagulation|negat…
comp127905_c1_seq2	181.726	0	363.453	Inf	Inf	0.0135842	0.931045	Up	0	7.11885	1178
comp127915_c0_seq3	287.085	572.756	1.41421	0.00246914	-8.66178	0.0179792	1	Down	4.68525	0.00664199	5503	gi|328900207|gb|AEB54658.1|H+ transporting ATP synthase O subunit [Procambarus clarkii]	1e-17	sp|Q24439|ATPO_DROME	3e-18	ATP synthase subunit O, mitochondrial OS=Drosophila melanogaster GN=ATPsynO PE=2 SV=2	KOG1662	8e-19	Mitochondrial F1F0-ATP synthase, subunit OSCP/ATP5	ko05010;ko05012;ko05016;ko00190	Alzheimer's disease|Parkinson's disease|Huntington's disease|Oxidative phosphorylation	4	K02137	ATPeF0O, ATP5O, ATP5	F-type H+-transporting ATPase subunit O	GO:0005811;GO:0005743;GO:0005739;GO:0046933;GO:0015986	lipid particle|mitochondrial inner membrane|mitochondrion|proton-transporting ATP synthase activity, rotational mechanism|ATP synthesis coupled proton transport
comp127917_c0_seq2	5581.55	2.12132	11161	5261.33	12.3612	0.000957968	0.33299	Up	0.118007	302.352	851
comp127921_c0_seq4	463.155	0	926.31	Inf	Inf	0.00185634	0.378845	Up	0	11.9105	1793
comp127946_c0_seq4	311.834	0	623.668	Inf	Inf	0.00432595	0.517143	Up	0	39.5245	364
comp127963_c0_seq1	424.971	4.24264	845.7	199.333	7.63904	0.0148863	0.985115	Up	0.148897	14.5071	1343
comp127970_c0_seq1	222.032	0	444.063	Inf	Inf	0.00900894	0.7485	Up	0	9.15271	1118
comp127987_c0_seq2	584.777	1.41421	1168.14	826	9.69	0.00362242	0.480273	Up	0.0379418	20.1287	1338
comp127990_c0_seq1	487.55	6.36396	968.736	152.222	7.25004	0.0167182	1	Up	0.313499	23.9235	933
comp127999_c1_seq3	628.264	6.36396	1250.16	196.444	7.61798	0.011139	0.83602	Up	0.119464	12.1142	2378
comp128012_c1_seq2	901.561	1.41421	1801.71	1274	10.3151	0.00181767	0.378675	Up	0.0351391	27.5273	1509
comp128014_c0_seq2	1128.9	20.5061	2237.29	109.103	6.76955	0.016003	1	Up	0.667888	37.7258	1367	gi|752860511|ref|XP_011252275.1|PREDICTED: high mobility group nucleosome-binding domain-containing protein 5-like, partial [Camponotus floridanus]	4e-06
comp128016_c0_seq3	202.94	0	405.879	Inf	Inf	0.0108752	0.82481	Up	0	4.53165	2063
comp128023_c1_seq1	742.462	14.1421	1470.78	104	6.70044	0.0189144	1	Up	0.673898	35.8838	945
comp128033_c0_seq1	352.139	0	704.278	Inf	Inf	0.00331466	0.462734	Up	0	22.8541	710
comp128035_c0_seq2	300.874	0.707107	601.041	850	9.73132	0.00887443	0.742513	Up	0.0155259	7.63398	1813
comp128067_c0_seq1	7405.88	4.94975	14806.8	2991.43	11.5466	0.002387	0.406158	Up	0.153627	223.088	1530
comp128093_c0_seq2	148.846	0.707107	296.985	420	8.71425	0.033677	1	Up	0.0450389	6.5094	1053
comp128104_c0_seq2	5779.18	11551.3	7.07107	0.000612145	-10.6738	0.00271913	0.420164	Down	472.481	0.139768	1101
comp128113_c0_seq2	278.6	5.65685	551.543	97.5	6.60733	0.0395591	1	Up	0.123248	5.92633	2143
comp128119_c0_seq18	172.181	342.947	1.41421	0.00412371	-7.92184	0.0447472	1	Down	5.13753	0.00999578	3009	gi|1009525509|ref|XP_015908801.1|PREDICTED: irregular chiasm C-roughest protein-like isoform X2 [Parasteatoda tepidariorum]	2e-102	sp|Q08180|ICCR_DROME	9e-102	Irregular chiasm C-roughest protein OS=Drosophila melanogaster GN=rst PE=1 SV=2	KOG3510	2e-97	FOG: Immunoglobulin C-2 Type/fibronectin type III domains							GO:0045177;GO:0005913;GO:0016021;GO:0005886;GO:0042802;GO:0030165;GO:0048749;GO:0001745;GO:0046667;GO:0007156;GO:0046331;GO:0007520;GO:0016202;GO:0046666	apical part of cell|cell-cell adherens junction|integral component of membrane|plasma membrane|identical protein binding|PDZ domain binding|compound eye development|compound eye morphogenesis|compound eye retinal cell programmed cell death|homophilic cell adhesion via plasma membrane adhesion molecules|lateral inhibition|myoblast fusion|regulation of striated muscle tissue development|retinal cel…
comp128126_c0_seq1	5475.13	7.07107	10943.2	1547.6	10.5958	0.00244046	0.406158	Up	0.137304	112.767	2237	gi|755989221|ref|XP_011312114.1|PREDICTED: carbonic anhydrase 2-like [Fopius arisanus]	7e-07
comp128137_c0_seq2	873.63	1744.43	2.82843	0.0016214	-9.26854	0.00396137	0.502995	Down	44.8972	0.0444674	1750
comp128207_c0_seq1	1905.65	0	3811.31	Inf	Inf	0.000236893	0.33299	Up	0	72.1314	1218
comp128212_c0_seq5	318.198	0	636.396	Inf	Inf	0.0041381	0.505589	Up	0	9.12684	1609
comp128239_c0_seq4	743.169	1.41421	1484.92	1050	10.0362	0.00244045	0.406158	Up	0.0446742	23.6276	1449
comp128240_c0_seq6	306.177	1.41421	610.94	432	8.75489	0.0124115	0.890951	Up	0.0569307	11.2233	1255
comp128254_c0_seq3	1018.59	0.707107	2036.47	2880	11.4919	0.000992373	0.33299	Up	0.0190498	22.8379	2056	gi|156363410|ref|XP_001626037.1|predicted protein [Nematostella vectensis]	5e-23
comp128261_c0_seq2	1524.88	3046.92	2.82843	0.00092829	-10.0731	0.00197603	0.379217	Down	73.972	0.0395005	1855
comp128267_c0_seq6	501.339	14.1421	988.535	69.9	6.12722	0.0335273	1	Up	0.343452	12.1526	1876	gi|646719565|gb|KDR21622.1|Carboxypeptidase B [Zootermopsis nevadensis]	6e-72	sp|P04069|CBPB_ASTAS	5e-64	Carboxypeptidase B OS=Astacus astacus PE=1 SV=1	KOG2650	2e-66	Zinc carboxypeptidase	ko04972;ko04974	Pancreatic secretion|Protein digestion and absorption	2	K01298	CPA2	carboxypeptidase A2	GO:0005576;GO:0004181;GO:0008270	extracellular region|metallocarboxypeptidase activity|zinc ion binding
comp128276_c0_seq5	478.711	1.41421	956.008	676	9.40088	0.00519587	0.561866	Up	0.0339946	14.8598	1484
comp128299_c0_seq1	415.072	821.658	8.48528	0.010327	-6.59743	0.0301749	1	Down	20.1641	0.113176	1835
comp128305_c0_seq3	288.5	571.342	5.65685	0.00990099	-6.65821	0.040626	1	Down	17.9575	0.100554	1432
comp128333_c0_seq2	935.502	0	1871	Inf	Inf	0.000539123	0.33299	Up	0	28.5232	1512
comp128338_c1_seq2	421.436	7.07107	835.8	118.2	6.88509	0.0234338	1	Up	0.291299	17.4347	1105
comp128354_c0_seq2	171.12	0	342.24	Inf	Inf	0.0152424	0.995178	Up	0	10.0114	787
comp128358_c0_seq1	133.643	0	267.286	Inf	Inf	0.0232426	1	Up	0	4.74694	1299
comp128383_c0_seq1	5380.73	190.212	10571.2	55.5762	5.7964	0.048685	1	Up	2.34253	66.7268	3652	gi|1009603479|ref|XP_015929797.1|PREDICTED: lysosomal alpha-mannosidase-like isoform X2 [Parasteatoda tepidariorum]	0	sp|Q8VHC8|MA2B1_CAVPO	0	Lysosomal alpha-mannosidase OS=Cavia porcellus GN=MAN2B1 PE=1 SV=1	KOG1959	0	Glycosyl hydrolase, family 38 - alpha-mannosidase	ko04142;ko00511	Lysosome|Other glycan degradation	2	K12311	MAN2B1, LAMAN	lysosomal alpha-mannosidase	GO:0005764;GO:0004559;GO:0030246;GO:0008270;GO:0006013	lysosome|alpha-mannosidase activity|carbohydrate binding|zinc ion binding|mannose metabolic process
comp128409_c0_seq2	1338.55	0	2677.11	Inf	Inf	0.000334765	0.33299	Up	0	37.4667	1647
comp128440_c0_seq1	2189.91	8.48528	4371.33	515.167	9.0089	0.00330881	0.462734	Up	0.225819	58.718	1716
comp128443_c0_seq3	89.0955	0	178.191	Inf	Inf	0.0416663	1	Up	0	3.45595	1187
comp128457_c0_seq2	552.25	1.41421	1103.09	780	9.60733	0.00400439	0.504234	Up	0.0613533	20.4857	1241
comp128482_c0_seq3	172.181	342.947	1.41421	0.00412371	-7.92184	0.0447472	1	Down	5.02414	0.0108399	3073	gi|939687279|ref|XP_014300235.1|PREDICTED: uncharacterized protein LOC106694210 [Microplitis demolitor]	1e-06
comp128486_c0_seq6	1406.44	4.24264	2808.63	662	9.37069	0.00255602	0.410115	Up	0.0819455	29.3611	2205
comp128489_c0_seq4	376.181	9.89949	742.462	75	6.22882	0.0380719	1	Up	0.239029	8.93425	1915	gi|397881228|gb|AFO68119.1|tachylectin [Macrobrachium rosenbergii]	5e-11
comp128490_c2_seq2	287.439	567.807	7.07107	0.0124533	-6.32733	0.0480952	1	Down	7.031	0.0447042	3639	gi|1009538866|ref|XP_015905981.1|PREDICTED: tyrosine-protein kinase Src42A-like [Parasteatoda tepidariorum]	2e-149	sp|Q9V9J3|SRC42_DROME	2e-173	Tyrosine-protein kinase Src42A OS=Drosophila melanogaster GN=Src42A PE=2 SV=1	KOG0197	4e-174	Tyrosine kinases	ko04013	MAPK signaling pathway - fly	1	K08892	FRK, PTK5	fyn-related kinase	GO:0005912;GO:0005737;GO:0005886;GO:0005524;GO:0004715;GO:0004713;GO:0051017;GO:0034332;GO:0043277;GO:0007411;GO:0016477;GO:0048749;GO:0042742;GO:0007391;GO:0007395;GO:0090136;GO:0046529;GO:0007476;GO:0036335;GO:0007254;GO:0042059;GO:0045886;GO:0007424;GO:0018108;GO:0006468;GO:0007435;GO:0007169;GO:0006099	adherens junction|cytoplasm|plasma membrane|ATP binding|non-membrane spanning protein tyrosine kinase activity|protein tyrosine kinase activity|actin filament bundle assembly|adherens junction organization|apoptotic cell clearance|axon guidance|cell migration|compound eye development|defense response to bacterium|dorsal closure|dorsal closure, spreading of leading edge cells|epithelial cell-cell …
comp128495_c0_seq4	127.986	0	255.973	Inf	Inf	0.024862	1	Up	0	4.07902	1449
comp128499_c2_seq4	1306.73	26.8701	2586.6	96.2632	6.58891	0.017904	1	Up	1.28888	63.8486	934
comp128531_c0_seq2	214.96	4.24264	425.678	100.333	6.64866	0.0494674	1	Up	0.225389	11.2162	874
comp128556_c0_seq11	122.329	0	244.659	Inf	Inf	0.0266385	1	Up	0	8.9917	626
comp128561_c2_seq1	3629.58	25.4558	7233.7	284.167	8.15059	0.00766982	0.688867	Up	3.10249	451.909	369
comp128565_c0_seq1	570.282	24.7487	1115.81	45.0857	5.4946	0.0477598	1	Up	0.790017	18.1676	1415
comp128569_c0_seq2	123.037	0	246.073	Inf	Inf	0.0264071	1	Up	0	2.712	2094
comp128573_c0_seq2	348.957	2.12132	695.793	328	8.35755	0.0125428	0.896219	Up	0.0818338	14.8709	1078
comp128585_c0_seq1	156.624	313.248	0	0	#NAME?	0.0298198	1	Down	4.76913	0	2959	gi|961097611|ref|XP_014774300.1|PREDICTED: uncharacterized protein LOC106872008 isoform X1 [Octopus bimaculoides]	1e-07
comp128587_c1_seq6	108.187	0	216.375	Inf	Inf	0.0319443	1	Up	0	4.92238	1013
comp128601_c0_seq1	1858.28	3713.72	2.82843	0.000761615	-10.3587	0.0016353	0.36784	Down	46.8239	0.0154743	3572	gi|123472754|ref|XP_001319569.1|viral A-type inclusion protein [Trichomonas vaginalis G3]	1e-07
comp128613_c0_seq3	537.755	2.12132	1073.39	506	8.98299	0.0056215	0.582944	Up	0.0406809	9.51095	2600
comp128638_c0_seq1	414.365	0	828.729	Inf	Inf	0.00233854	0.406158	Up	0	21.3785	893
comp128645_c1_seq2	2568.92	1.41421	5136.42	3632	11.8265	0.000631854	0.33299	Up	0.011844	28.1006	4214
comp128667_c2_seq4	271.529	0	543.058	Inf	Inf	0.00585828	0.60011	Up	0	13.843	904
comp128691_c0_seq3	130.815	0	261.63	Inf	Inf	0.0240341	1	Up	0	3.49533	1724
comp128692_c0_seq4	1118.64	4.24264	2233.04	526.333	9.03983	0.00335898	0.465492	Up	0.159577	46.3253	1111
comp128698_c0_seq1	177.484	0	354.968	Inf	Inf	0.014221	0.95702	Up	0	4.63033	1767
comp128698_c1_seq1	860.549	1.41421	1719.68	1216	10.2479	0.00194687	0.378845	Up	0.0330262	19.5422	2029
comp128706_c0_seq4	20456.2	9.19239	40903.3	4449.69	12.1195	0.0161656	1	Up	0.202985	466.339	2022	gi|347596010|gb|AEP13982.1|lipid storage droplet protein [Penaeus monodon]	4e-07
comp128706_c2_seq1	163.342	0	326.683	Inf	Inf	0.0166041	1	Up	0	18.2494	413
comp128708_c1_seq5	20654.6	14.1421	41295	2920	11.5118	0.0204668	1	Up	0.265369	388.4	2451	gi|908410773|ref|XP_013066469.1|PREDICTED: serine-aspartate repeat-containing protein C-like [Biomphalaria glabrata]	7e-18
comp128722_c0_seq1	107.48	0	214.96	Inf	Inf	0.0322477	1	Up	0	3.84085	1289
comp128723_c0_seq3	1140.56	24.0416	2257.08	93.8824	6.55278	0.0186676	1	Up	0.598462	28.9339	1798
comp128735_c0_seq3	1630.94	60.1041	3201.78	53.2706	5.73527	0.0331598	1	Up	1.46601	40.1374	1839
comp128759_c0_seq8	348.604	691.55	5.65685	0.00817996	-6.93369	0.0293721	1	Down	5.54398	0.0239186	5616	gi|939644741|ref|XP_014272460.1|PREDICTED: protein Skeletor, isoforms B/C [Halyomorpha halys]	0	sp|Q9VGY6|SKEL1_DROME	2e-82	Protein Skeletor, isoforms B/C OS=Drosophila melanogaster GN=Skeletor PE=1 SV=2	KOG4731	5e-179	Protein predicted to be involved in spindle matrix formation, contains DM13, DoH, and DOMON domains							GO:0005737;GO:0005874;GO:0005730;GO:0005634;GO:0005700;GO:0005819;GO:0004500;GO:0006584;GO:0051301;GO:0051321;GO:0007067;GO:0006997;GO:0055114;GO:0051225	cytoplasm|microtubule|nucleolus|nucleus|polytene chromosome|spindle|dopamine beta-monooxygenase activity|catecholamine metabolic process|cell division|meiotic cell cycle|mitotic nuclear division|nucleus organization|oxidation-reduction process|spindle assembly
comp128773_c0_seq2	5505.89	0.707107	11011.1	15572	13.9267	0.000492223	0.33299	Up	0.0211094	113.315	2240
comp128781_c0_seq1	155.21	0.707107	309.713	438	8.77479	0.0315136	1	Up	0.0264372	4.3298	1649
comp128791_c0_seq1	689.076	30.4056	1347.75	44.3256	5.47007	0.0453459	1	Up	2.22937	50.4969	615
comp128792_c0_seq2	383.959	2.82843	765.09	270.5	8.07948	0.0129327	0.91026	Up	0.240814	33.6104	525
comp128800_c1_seq1	175.362	350.725	0	0	#NAME?	0.0246688	1	Down	3.93984	0	4012
comp128800_c2_seq1	114.198	228.395	0	0	#NAME?	0.0472971	1	Down	6.29671	0	1632
comp128840_c0_seq1	1759.64	24.7487	3494.52	141.2	7.1416	0.0119916	0.872997	Up	0.530524	37.8719	2127
comp128846_c1_seq6	888.48	40.3051	1736.65	43.0877	5.4292	0.0435933	1	Up	2.40202	53.2586	752
comp128852_c1_seq4	2672.16	2.82843	5341.48	1888.5	10.883	0.00106514	0.334829	Up	0.0823425	78.7408	1564
comp128873_c0_seq2	857.367	1707.66	7.07107	0.00414079	-7.91588	0.00849565	0.722788	Down	64.8464	0.128901	1186
comp128878_c0_seq1	2862.37	28.2843	5696.45	201.4	7.65392	0.00944624	0.767701	Up	0.51323	52.2815	2512
comp128883_c0_seq3	202.94	0	405.879	Inf	Inf	0.0108752	0.82481	Up	0	5.06092	1848
comp128913_c0_seq2	1187.94	0	2375.88	Inf	Inf	0.000387376	0.33299	Up	0	64.6594	847
comp128921_c0_seq2	2929.54	1.41421	5857.67	4142	12.0161	0.000604985	0.33299	Up	0.0222936	45.2869	2982	gi|321476851|gb|EFX87811.1|hypothetical protein DAPPUDRAFT_96576 [Daphnia pulex]	5e-58	sp|W4VS53|CRVP_TRILK	7e-53	CRISP/Allergen/PR-1 OS=Trittame loki PE=1 SV=1	KOG3017	1e-28	Defense-related protein containing SCP domain							GO:0005576	extracellular region
comp128925_c0_seq5	207.536	0.707107	414.365	586	9.19476	0.0187161	1	Up	0.0448392	11.6063	823
comp128926_c1_seq1	187.03	2.12132	371.938	175.333	7.45396	0.039835	1	Up	0.0615876	5.08481	1687
comp128927_c0_seq2	1397.95	0	2795.9	Inf	Inf	0.000318539	0.33299	Up	0	52.3586	1231
comp128928_c0_seq5	10446.4	36.0624	20856.8	578.353	9.17581	0.0156782	1	Up	0.267072	79.0434	6083	gi|761383099|gb|AJP60220.1|vitellogenin receptor [Macrobrachium nipponense]	8e-81	sp|A2ARV4|LRP2_MOUSE	4e-58	Low-density lipoprotein receptor-related protein 2 OS=Mus musculus GN=Lrp2 PE=1 SV=1	KOG1215	5e-58	Low-density lipoprotein receptors containing Ca2+-binding EGF-like domains	ko04340;ko04918	Hedgehog signaling pathway|Thyroid hormone synthesis	2	K06233	LRP2	low density lipoprotein-related protein 2	GO:0045177;GO:0016324;GO:0005903;GO:0031526;GO:0005905;GO:0030139;GO:0005783;GO:0005768;GO:0070062;GO:0005794;GO:0016021;GO:0005765;GO:0016020;GO:0043235;GO:0005509;GO:0004872;GO:0042813;GO:0017147;GO:0060070;GO:0008283;GO:0030900;GO:0006898;GO:0006766;GO:0044332	apical part of cell|apical plasma membrane|brush border|brush border membrane|coated pit|endocytic vesicle|endoplasmic reticulum|endosome|extracellular exosome|Golgi apparatus|integral component of membrane|lysosomal membrane|membrane|receptor complex|calcium ion binding|receptor activity|Wnt-activated receptor activity|Wnt-protein binding|canonical Wnt signaling pathway|cell proliferation|forebr…
comp128939_c0_seq7	1699.18	0	3398.36	Inf	Inf	0.000261027	0.33299	Up	0	208.359	376
comp128945_c0_seq1	4557.66	0.707107	9114.61	12890	13.654	0.000426197	0.33299	Up	0.0177486	121.387	1731
comp128954_c0_seq2	191.626	0	383.252	Inf	Inf	0.0122264	0.880996	Up	0	7.57328	1165
comp128956_c0_seq2	130.108	0	260.215	Inf	Inf	0.0242376	1	Up	0	4.38315	1365
comp128965_c0_seq4	2068.29	1.41421	4135.16	2924	11.5137	0.000715932	0.33299	Up	0.106932	130.763	729
comp128966_c2_seq3	10360.5	4.24264	20716.8	4883	12.2536	0.00344692	0.470057	Up	0.0867115	224.534	2127
comp129013_c0_seq2	181.019	362.039	0	0	#NAME?	0.0233194	1	Down	15.3771	0	1060
comp129027_c0_seq2	197.283	0	394.566	Inf	Inf	0.0115256	0.850635	Up	0	5.19476	1749
comp129030_c0_seq2	21869.4	11.3137	43727.5	3865	11.9163	0.020123	1	Up	0.218669	442.116	2280
comp129044_c0_seq1	709.582	30.4056	1388.76	45.6744	5.51331	0.0436111	1	Up	0.65242	15.3981	2080
comp129046_c0_seq1	213.193	423.557	2.82843	0.0066778	-7.22641	0.0436619	1	Down	11.5514	0.0360136	1650
comp129052_c0_seq8	543.058	1079.04	7.07107	0.00655308	-7.25361	0.0167478	1	Down	18.0944	0.0582733	2686	gi|242012129|ref|XP_002426793.1|N-acetyllactosaminide beta-1,3-N-acetylglucosaminyltransferase, putative [Pediculus humanus corporis]	2e-56	sp|Q5R4S2|B4GA1_PONAB	3e-30	Beta-1,4-glucuronyltransferase 1 OS=Pongo abelii GN=B4GAT1 PE=2 SV=1	KOG3765	2e-56	Predicted glycosyltransferase	ko00515	Mannose type O-glycan biosyntheis	1	K21032	B4GAT1	beta-1,4-glucuronyltransferase 1	GO:0005794;GO:0000139;GO:0016021;GO:0015020;GO:0046872;GO:0035269	Golgi apparatus|Golgi membrane|integral component of membrane|glucuronosyltransferase activity|metal ion binding|protein O-linked mannosylation
comp129070_c2_seq5	634.982	1.41421	1268.55	897	9.80896	0.00315108	0.447616	Up	0.0513757	24.2556	1206
comp129071_c0_seq1	9677.82	6.36396	19349.3	3040.44	11.5701	0.00409993	0.505589	Up	0.200134	316.578	1409
comp129091_c0_seq2	224.506	3.53553	445.477	126	6.97728	0.0404622	1	Up	0.175093	10.4627	981
comp129114_c0_seq1	1061.72	36.0624	2087.38	57.8824	5.85505	0.03116	1	Up	0.71159	21.1654	2274
comp129126_c0_seq5	267.286	4.24264	530.33	125	6.96578	0.0341078	1	Up	0.0524601	3.11771	3924
comp129131_c1_seq1	217.435	2.12132	432.749	204	7.67243	0.0305624	1	Up	0.10632	12.6238	790
comp129158_c0_seq1	9577.05	38.1838	19115.9	500.63	8.9676	0.0151381	0.995178	Up	0.500772	128.811	3421
comp129172_c0_seq1	226.628	2.12132	451.134	212.667	7.73245	0.0283486	1	Up	0.0466419	4.7622	2184
comp129179_c0_seq1	10340.4	17.6777	20663.1	1168.88	10.1909	0.00924482	0.75778	Up	0.164979	98.9078	4816	gi|908428981|ref|XP_013075173.1|PREDICTED: mucin-2-like [Biomphalaria glabrata]	2e-09
comp129190_c0_seq1	1217.99	28.9914	2406.99	83.0244	6.37546	0.0210325	1	Up	0.330156	13.9279	3983	gi|939263361|ref|XP_014251642.1|PREDICTED: uncharacterized protein LOC106667900 [Cimex lectularius]	2e-55
comp129195_c0_seq1	2397.8	11.3137	4784.28	422.875	8.72409	0.00413907	0.505589	Up	0.166456	35.6265	3096
comp129200_c0_seq2	1428.36	18.3848	2838.33	154.385	7.27039	0.0108808	0.82481	Up	0.443358	34.8153	1879
comp129210_c0_seq2	123.037	0	246.073	Inf	Inf	0.0264071	1	Up	0	4.45656	1273
comp129211_c0_seq3	254.558	1.41421	507.703	359	8.48784	0.0178273	1	Up	0.0700284	16.068	729
comp129236_c1_seq4	288.5	1.41421	575.585	407	8.66888	0.0139621	0.949222	Up	0.0550309	9.56849	1387
comp129258_c0_seq2	3405.43	9.89949	6800.95	687	9.42417	0.00309793	0.445609	Up	0.341446	118.949	1318
comp129276_c0_seq2	179.252	0.707107	357.796	506	8.98299	0.0246445	1	Up	0.0157043	3.2814	2513	gi|1022771999|gb|KZS16213.1|Uncharacterized protein APZ42_018086 [Daphnia magna]	9e-06
comp129307_c0_seq1	627.557	13.435	1241.68	92.4211	6.53015	0.0228366	1	Up	1.03563	47.781	599
comp129307_c1_seq1	2390.37	3.53553	4777.21	1351.2	10.4	0.00136588	0.342918	Up	0.14324	107.135	1028
comp129310_c0_seq1	1766.71	3530.58	2.82843	0.000801122	-10.2857	0.00171048	0.372591	Down	106.06	0.0521893	1499
comp129337_c0_seq1	300.874	0.707107	601.041	850	9.73132	0.00887443	0.742513	Up	0.0203251	7.03507	1969	gi|829193777|ref|XP_001024781.2|hypothetical protein TTHERM_00237510 [Tetrahymena thermophila SB210]	2e-06
comp129346_c0_seq1	175.362	0	350.725	Inf	Inf	0.0145525	0.968013	Up	0	9.43765	856
comp129346_c1_seq8	292.742	0	585.484	Inf	Inf	0.00496997	0.547995	Up	0	5.91543	2283
comp129370_c1_seq2	13004	14.8492	25993.2	1750.48	10.7735	0.0106206	0.818178	Up	0.470301	424.685	1411
comp129421_c0_seq3	226.274	0	452.548	Inf	Inf	0.00865506	0.733059	Up	0	6.5025	1605	gi|332373302|gb|AEE61792.1|unknown [Dendroctonus ponderosae]	4e-80	sp|P06133|UD2B4_HUMAN	3e-60	UDP-glucuronosyltransferase 2B4 OS=Homo sapiens GN=UGT2B4 PE=1 SV=2	KOG1192	4e-74	UDP-glucuronosyl and UDP-glucosyl transferase	ko05204;ko00040;ko00053;ko00140;ko00830;ko00860;ko00980;ko00982;ko00983	Chemical carcinogenesis|Pentose and glucuronate interconversions|Ascorbate and aldarate metabolism|Steroid hormone biosynthesis|Retinol metabolism|Porphyrin and chlorophyll metabolism|Metabolism of xenobiotics by cytochrome P450|Drug metabolism - cytochrome P450|Drug metabolism - other enzymes	9	K00699	UGT	glucuronosyltransferase
comp129426_c0_seq2	8664.18	1.41421	17326.9	12252	13.5807	0.00130889	0.34147	Up	0.0461046	272.474	1466	gi|828232744|ref|XP_012565573.1|PREDICTED: uncharacterized protein LOC105849689, partial [Hydra vulgaris]	1e-23
comp129437_c0_seq1	228.749	2.12132	455.377	214.667	7.74595	0.0278709	1	Up	0.0321032	3.76511	2785
comp129485_c0_seq1	1303.2	7.07107	2599.32	367.6	8.52199	0.00455067	0.531523	Up	0.067592	12.3927	4834	gi|646722394|gb|KDR23407.1|Carbohydrate sulfotransferase 5, partial [Zootermopsis nevadensis]	3e-113	sp|Q9QUP4|CHST5_MOUSE	5e-19	Carbohydrate sulfotransferase 5 OS=Mus musculus GN=Chst5 PE=2 SV=1										GO:0000139;GO:0016021;GO:0001517;GO:0005975;GO:0018146;GO:0006044;GO:0006790	Golgi membrane|integral component of membrane|N-acetylglucosamine 6-O-sulfotransferase activity|carbohydrate metabolic process|keratan sulfate biosynthetic process|N-acetylglucosamine metabolic process|sulfur compound metabolic process
comp129506_c0_seq1	317.491	0	634.982	Inf	Inf	0.00415838	0.505974	Up	0	17.6386	829
comp129507_c1_seq6	540.937	0	1081.87	Inf	Inf	0.00136453	0.342918	Up	0	23.5684	1058
comp129516_c0_seq1	4164.51	0.707107	8328.3	11778	13.5238	0.000408367	0.33299	Up	0.0289627	137.83	1393
comp129544_c0_seq1	1819.74	0.707107	3638.77	5146	12.3292	0.000513214	0.33299	Up	0.00966604	27.7274	3025	gi|411125289|gb|AFW04307.1|alkaline phosphatase, partial [Macrobrachium rosenbergii]	1e-125	sp|Q92058|PPBT_CHICK	1e-129	Alkaline phosphatase, tissue-nonspecific isozyme OS=Gallus gallus GN=ALPL PE=2 SV=1	KOG4126	1e-124	Alkaline phosphatase	ko02020;ko00730;ko00790;ko00627	Two-component system|Thiamine metabolism|Folate biosynthesis|Aminobenzoate degradation	4	K01077	E3.1.3.1, phoA, phoB	alkaline phosphatase	GO:0031225;GO:0005886;GO:0004035;GO:0046872	anchored component of membrane|plasma membrane|alkaline phosphatase activity|metal ion binding
comp129567_c0_seq3	3852.32	0	7704.64	Inf	Inf	0.00019834	0.33299	Up	0	179.029	992
comp129583_c1_seq1	146.018	292.035	0	0	#NAME?	0.0332732	1	Down	3.60923	0	3645
comp129591_c0_seq1	80.6102	0	161.22	Inf	Inf	0.0471834	1	Up	0	3.58432	1041
comp129595_c0_seq3	356.028	2.12132	709.935	334.667	8.38658	0.0120687	0.873534	Up	0.0868746	12.9891	1260
comp129600_c0_seq10	379.009	0	758.018	Inf	Inf	0.00282721	0.426071	Up	0	11.1503	1567	gi|918302572|gb|KOF75604.1|hypothetical protein OCBIM_22034476mg [Octopus bimaculoides]	1e-68
comp129607_c0_seq2	275.772	1.41421	550.129	389	8.60363	0.015258	0.995178	Up	0.0312347	7.82141	1623
comp129608_c0_seq1	5731.45	132.229	11330.7	85.6898	6.42105	0.0345271	1	Up	1.72557	75.6873	3451	gi|675371473|gb|KFM64375.1|G-protein coupled receptor Mth2, partial [Stegodyphus mimosarum]	2e-146	sp|Q95NQ0|MTH2_DROSI	3e-26	G-protein coupled receptor Mth2 OS=Drosophila simulans GN=mth2 PE=3 SV=1										GO:0016021;GO:0005886;GO:0004930;GO:0007166;GO:0006950	integral component of membrane|plasma membrane|G-protein coupled receptor activity|cell surface receptor signaling pathway|response to stress
comp129621_c0_seq1	281.782	563.564	0	0	#NAME?	0.00990715	0.782293	Down	52.5417	0	483
comp129625_c0_seq1	1989.8	3972.53	7.07107	0.00177999	-9.13391	0.00325097	0.45721	Down	70.0445	0.0619325	2554
comp129659_c0_seq4	1974.95	2.82843	3947.07	1395.5	10.4466	0.00128185	0.34072	Up	0.0624381	48.6809	1869
comp129719_c0_seq4	439.82	0	879.641	Inf	Inf	0.00206459	0.384531	Up	0	39.9399	508
comp129726_c0_seq4	229.81	2.82843	456.791	161.5	7.33539	0.0333508	1	Up	0.0591932	4.97298	2117
comp129728_c3_seq1	2314.71	4537.5	91.9239	0.0202587	-5.62532	0.037616	1	Down	72.59	0.758465	2815	gi|296042343|gb|ADG85661.1|lectin B isoform 2 [Marsupenaeus japonicus]	4e-07
comp129744_c0_seq1	395.273	0	790.545	Inf	Inf	0.00258423	0.411405	Up	0	8.1955	2225
comp129748_c0_seq2	4284.01	14.8492	8553.16	576	9.16993	0.00444305	0.526252	Up	0.279845	81.9785	2405
comp129752_c0_seq3	142.128	0	284.257	Inf	Inf	0.0210621	1	Up	0	4.74724	1382
comp129756_c0_seq2	4186.07	134.35	8237.79	61.3158	5.93819	0.0378228	1	Up	1.36646	42.8221	4435	gi|1009531833|ref|XP_015931233.1|PREDICTED: homeobox protein OTX2-like isoform X3 [Parasteatoda tepidariorum]	7e-38	sp|Q28FN6|OTX2_XENTR	4e-43	Homeobox protein OTX2 OS=Xenopus tropicalis GN=otx2 PE=2 SV=1	KOG2251	9e-46	Homeobox transcription factor	ko04550	Signaling pathways regulating pluripotency of stem cells	1	K09326	OTX1	homeobox protein OTX1	GO:0005634;GO:0043565;GO:0003700;GO:0007275	nucleus|sequence-specific DNA binding|transcription factor activity, sequence-specific DNA binding|multicellular organismal development
comp129771_c0_seq5	2027.28	104.652	3949.9	37.7432	5.23815	0.04836	1	Up	1.37129	26.4818	3438
comp129772_c1_seq1	1629.17	60.8112	3197.54	52.5814	5.71648	0.0336129	1	Up	1.06173	28.6323	2574	gi|926617349|ref|XP_013773835.1|PREDICTED: calpain-B-like isoform X3 [Limulus polyphemus]	8e-140	sp|Q11002|CANA_DROME	4e-152	Calpain-A OS=Drosophila melanogaster GN=CalpA PE=1 SV=2	KOG0045	1e-152	Cytosolic Ca2+-dependent cysteine protease (calpain), large subunit (EF-Hand protein superfamily)							GO:0015629;GO:0005737;GO:0005622;GO:0043025;GO:0005509;GO:0004198;GO:0021919;GO:0042335;GO:0050832;GO:0008340;GO:0009953;GO:0006909;GO:0016540;GO:0006508	actin cytoskeleton|cytoplasm|intracellular|neuronal cell body|calcium ion binding|calcium-dependent cysteine-type endopeptidase activity|BMP signaling pathway involved in spinal cord dorsal/ventral patterning|cuticle development|defense response to fungus|determination of adult lifespan|dorsal/ventral pattern formation|phagocytosis|protein autoprocessing|proteolysis
comp129779_c0_seq1	2274.06	5.65685	4542.45	803	9.64926	0.00217253	0.394932	Up	0.340211	146.658	714
comp129788_c0_seq17	966.261	0.707107	1931.82	2732	11.4157	0.00106892	0.334829	Up	0.0154886	23.8081	1870	gi|123431484|ref|XP_001308190.1|hypothetical protein [Trichomonas vaginalis G3]	2e-07
comp129792_c0_seq1	437.346	13.435	861.256	64.1053	6.00237	0.0394474	1	Up	0.520665	17.1951	1154
comp129804_c0_seq1	246.073	1.41421	490.732	347	8.43879	0.0190247	1	Up	0.0854779	13.9255	812
comp129804_c1_seq2	258.448	3.53553	513.36	145.2	7.1819	0.0316552	1	Up	0.0868081	6.10582	1937
comp129805_c0_seq1	1107.33	45.2548	2169.4	47.9375	5.58308	0.037647	1	Up	0.533054	13.018	3841	gi|969479033|ref|XP_015048084.1|uncharacterized protein Dyak_GE26319, isoform E [Drosophila yakuba]	3e-24
comp129815_c0_seq2	735.037	30.4056	1439.67	47.3488	5.56526	0.0416207	1	Up	1.63539	39.7092	836
comp129844_c1_seq4	433.81	14.8492	852.771	57.4286	5.8437	0.0438229	1	Up	0.297347	8.77877	2240
comp129845_c0_seq6	337.29	0	674.58	Inf	Inf	0.00364159	0.480273	Up	0	9.04624	1720
comp129858_c0_seq2	1083.64	2150.31	16.9706	0.00789214	-6.98537	0.0143132	0.959326	Down	33.5934	0.132465	2883
comp129859_c0_seq1	564.978	1129.96	0	0	#NAME?	0.00253348	0.410115	Down	96.1855	0	529
comp129860_c0_seq1	97.5807	0	195.161	Inf	Inf	0.0369337	1	Up	0	2.71064	1656	gi|399565626|dbj|BAM35674.1|putative reverse transcriptase [Marsupenaeus japonicus]	2e-43
comp129898_c0_seq1	758.018	5.65685	1510.38	267	8.0607	0.00752184	0.683549	Up	0.0764585	10.3099	3378	gi|646720918|gb|KDR22491.1|Inscuteable-like protein [Zootermopsis nevadensis]	1e-111	sp|Q3HNM7|INSC_MOUSE	2e-72	Protein inscuteable homolog OS=Mus musculus GN=Insc PE=1 SV=2										GO:0045177;GO:0005737;GO:0000132;GO:0060487;GO:0007399	apical part of cell|cytoplasm|establishment of mitotic spindle orientation|lung epithelial cell differentiation|nervous system development
comp129905_c0_seq1	1215.52	18.3848	2412.65	131.231	7.03596	0.0130723	0.915831	Up	0.380934	25.9296	2145	gi|241157750|ref|XP_002408147.1|conserved hypothetical protein [Ixodes scapularis]	8e-16				KOG1700	4e-14	Regulatory protein MLP and related LIM proteins
comp129925_c1_seq5	415.425	820.951	9.89949	0.0120586	-6.3738	0.0342937	1	Down	10.9161	0.0693267	3386	gi|1009604385|ref|XP_015930154.1|PREDICTED: extended synaptotagmin-2-like isoform X2 [Parasteatoda tepidariorum]	4e-12	sp|Q5RCG7|AAMP_PONAB	4e-06	Angio-associated migratory cell protein OS=Pongo abelii GN=AAMP PE=2 SV=2	KOG0296	1e-06	Angio-associated migratory cell protein (contains WD40 repeats)							GO:0009986;GO:0005737;GO:0005886;GO:0001525;GO:0030154;GO:0010595;GO:0014909	cell surface|cytoplasm|plasma membrane|angiogenesis|cell differentiation|positive regulation of endothelial cell migration|smooth muscle cell migration
comp129926_c0_seq1	1790.39	9.89949	3570.89	360.714	8.49471	0.00456948	0.5329	Up	0.171309	30.6625	2685	gi|119112777|ref|XP_318514.3|AGAP010794-PA [Anopheles gambiae str. PEST]	4e-67	sp|Q3UVU3|ZNT10_MOUSE	3e-17	Zinc transporter 10 OS=Mus musculus GN=Slc30a10 PE=1 SV=1	KOG1483	3e-61	Zn2+ transporter ZNT1 and related Cd2+/Zn2+ transporters (cation diffusion facilitator superfamily)	ko04978	Mineral absorption	1	K14688	SLC30A1, ZNT1	solute carrier family 30 (zinc transporter), member 1	GO:0016021;GO:0005886;GO:0005385;GO:0006828;GO:0061088;GO:0010043;GO:0071577	integral component of membrane|plasma membrane|zinc ion transmembrane transporter activity|manganese ion transport|regulation of sequestering of zinc ion|response to zinc ion|zinc II ion transmembrane transport
comp129935_c0_seq2	253.144	0	506.288	Inf	Inf	0.00681731	0.650036	Up	0	18.6691	625
comp129936_c3_seq1	20549.6	41076.5	22.6274	0.00055086	-10.826	0.0265124	1	Down	1866.68	0.519841	991	gi|146432655|gb|ABQ41228.1|male reproductive-related protein B [Macrobrachium rosenbergii]	1e-53
comp129954_c0_seq6	142.836	285.671	0	0	#NAME?	0.0344024	1	Down	6.72726	0	1914
comp129958_c0_seq6	107.48	0	214.96	Inf	Inf	0.0322477	1	Up	0	3.3743	1472
comp129961_c0_seq1	868.327	7.07107	1729.58	244.6	7.93428	0.00765682	0.688867	Up	0.226615	29.5911	1347
comp129968_c0_seq1	3969.34	3.53553	7935.15	2244.4	11.1321	0.00121007	0.34072	Up	0.0795701	101.517	1802
comp129976_c0_seq2	98.9949	0	197.99	Inf	Inf	0.0362117	1	Up	0	6.01377	761
comp129984_c0_seq1	113.137	0	226.274	Inf	Inf	0.0299282	1	Up	0	5.21483	998
comp130041_c1_seq4	918.885	0.707107	1837.06	2598	11.3432	0.00114966	0.34072	Up	0.0395289	38.5986	1097
comp130051_c0_seq1	199.051	0.707107	397.394	562	9.13443	0.0202828	1	Up	0.0268393	6.64579	1379
comp130093_c0_seq1	9064.76	6.36396	18123.1	2847.78	11.4756	0.00373369	0.484637	Up	0.228852	316.512	1320
comp130112_c0_seq5	675.994	24.0416	1327.95	55.2353	5.78752	0.0367062	1	Up	0.695017	19.4208	1576
comp130112_c1_seq6	138.593	0	277.186	Inf	Inf	0.0219375	1	Up	0	15.7884	405
comp130133_c0_seq3	569.221	21.2132	1117.23	52.6667	5.71882	0.0411478	1	Up	0.798451	21.4892	1198
comp130137_c0_seq1	580.535	1.41421	1159.66	820	9.67948	0.00366838	0.480273	Up	0.0376646	19.799	1351
comp130145_c0_seq6	78.4889	0	156.978	Inf	Inf	0.048707	1	Up	0	2.57941	1406
comp130152_c0_seq1	663.973	2.82843	1325.12	468.5	8.87191	0.0049778	0.547995	Up	0.044356	11.7219	2606
comp130191_c0_seq7	729.734	0	1459.47	Inf	Inf	0.000799641	0.33299	Up	0	20.0076	1682
comp130201_c0_seq2	527.855	17.6777	1038.03	58.72	5.87578	0.0384334	1	Up	1.02169	30.1393	794
comp130207_c0_seq1	235.467	0	470.933	Inf	Inf	0.00795384	0.695425	Up	0	3.62071	2999
comp130221_c0_seq3	79.196	0	158.392	Inf	Inf	0.0481921	1	Up	0	6.25776	581
comp130249_c0_seq1	129.047	0.707107	257.387	364	8.50779	0.0416973	1	Up	0.0292013	4.22782	1400
comp130253_c0_seq1	547.654	2.12132	1093.19	515.333	9.00936	0.00544509	0.574074	Up	0.0826689	20.7842	1212
comp130253_c1_seq3	81.3173	0	162.635	Inf	Inf	0.0466893	1	Up	0	7.94892	470
comp130282_c0_seq1	201.172	402.344	0	0	#NAME?	0.019194	1	Down	12.3569	0	1466
comp130288_c0_seq2	475.529	2.12132	948.937	447.333	8.80521	0.00700647	0.658956	Up	0.0252416	5.35375	4087	gi|1022760618|gb|KZS06718.1|Protein Sodium/potassium/calcium exchanger [Daphnia magna]	8e-156	sp|Q9VN12|NCKXH_DROME	6e-169	Probable sodium/potassium/calcium exchanger CG1090 OS=Drosophila melanogaster GN=CG1090 PE=2 SV=3	KOG1307	2e-165	K+-dependent Ca2+/Na+ exchanger NCKX1 and related proteins							GO:0016021;GO:0005887;GO:0005262;GO:0005509;GO:0008273;GO:0030955;GO:0031402;GO:0015293;GO:0070588;GO:0006816;GO:0006874;GO:0035725;GO:0006814	integral component of membrane|integral component of plasma membrane|calcium channel activity|calcium ion binding|calcium, potassium:sodium antiporter activity|potassium ion binding|sodium ion binding|symporter activity|calcium ion transmembrane transport|calcium ion transport|cellular calcium ion homeostasis|sodium ion transmembrane transport|sodium ion transport
comp130291_c2_seq3	762.261	0	1524.52	Inf	Inf	0.000743612	0.33299	Up	0	55.0871	638
comp130300_c0_seq10	247.134	0.707107	493.561	698	9.44708	0.0132574	0.921595	Up	0.0292715	8.45008	1346
comp130301_c0_seq5	370.17	2.12132	738.219	348	8.44294	0.0112011	0.838841	Up	0.0447328	7.08661	2402	gi|646709340|gb|KDR15248.1|hypothetical protein L798_10621 [Zootermopsis nevadensis]	1e-12
comp130307_c0_seq1	232.992	2.12132	463.862	218.667	7.77259	0.0269506	1	Up	0.0514934	5.83061	1834
comp130335_c1_seq1	12984.6	25960.7	8.48528	0.000326851	-11.5791	0.00776328	0.690265	Down	731.166	0.119252	1599
comp130351_c0_seq3	997.728	8.48528	1986.97	234.167	7.87139	0.00758955	0.685609	Up	0.20681	23.8261	1923	gi|1022773276|gb|KZS17388.1|Kynurenine/alpha-aminoadipate aminotransferase, mitochondrial [Daphnia magna]	4e-94	sp|Q5E9N4|AADAT_BOVIN	2e-103	Kynurenine/alpha-aminoadipate aminotransferase, mitochondrial OS=Bos taurus GN=AADAT PE=2 SV=1	KOG0634	2e-101	Aromatic amino acid aminotransferase and related proteins	ko00300;ko00310;ko00380;ko01210;ko01230	Lysine biosynthesis|Lysine degradation|Tryptophan metabolism|2-Oxocarboxylic acid metabolism|Biosynthesis of amino acids	5	K00825	AADAT, KAT2	kynurenine/2-aminoadipate aminotransferase	GO:0005739;GO:0047536;GO:0016212;GO:0030170;GO:0006103;GO:0009058;GO:0006536;GO:0070189;GO:0097052;GO:0033512	mitochondrion|2-aminoadipate transaminase activity|kynurenine-oxoglutarate transaminase activity|pyridoxal phosphate binding|2-oxoglutarate metabolic process|biosynthetic process|glutamate metabolic process|kynurenine metabolic process|L-kynurenine metabolic process|L-lysine catabolic process to acetyl-CoA via saccharopine
comp130368_c0_seq8	673.166	1346.33	0	0	#NAME?	0.00187808	0.378845	Down	29.0366	0	2088
comp130395_c0_seq14	1124.65	2.12132	2247.19	1059.33	10.0489	0.00182519	0.378845	Up	0.0292978	18.419	2812
comp130425_c0_seq17	685.54	9.19239	1361.89	148.154	7.21095	0.0138666	0.944425	Up	0.265056	20.2469	1551
comp130456_c0_seq2	328.805	653.367	4.24264	0.00649351	-7.26679	0.0264318	1	Down	8.02895	0.0243907	3665	gi|817064699|ref|XP_012254105.1|PREDICTED: sphingosine-1-phosphate lyase isoform X2 [Athalia rosae]	3e-134	sp|Q8CHN6|SGPL1_RAT	3e-154	Sphingosine-1-phosphate lyase 1 OS=Rattus norvegicus GN=Sgpl1 PE=2 SV=1	KOG1383	5e-151	Glutamate decarboxylase/sphingosine phosphate lyase	ko04071;ko00600	Sphingolipid signaling pathway|Sphingolipid metabolism	2	K01634	SGPL1, DPL1	sphinganine-1-phosphate aldolase	GO:0005789;GO:0016021;GO:0016831;GO:0030170;GO:0008117;GO:0097190;GO:0006672;GO:0006631;GO:0030149	endoplasmic reticulum membrane|integral component of membrane|carboxy-lyase activity|pyridoxal phosphate binding|sphinganine-1-phosphate aldolase activity|apoptotic signaling pathway|ceramide metabolic process|fatty acid metabolic process|sphingolipid catabolic process
comp130458_c0_seq5	450.427	889.54	11.3137	0.0127186	-6.29692	0.0338104	1	Down	7.2933	0.0450486	5494
comp130478_c0_seq3	173.948	346.482	1.41421	0.00408163	-7.93664	0.0440198	1	Down	4.96934	0.0116584	3142	gi|946724701|gb|ALM30210.1|viperin [Branchiostoma japonicum]	5e-125	sp|Q5RH95|RSAD2_DANRE	2e-153	Radical S-adenosyl methionine domain-containing protein 2 OS=Danio rerio GN=rsad2 PE=2 SV=1				ko05164	Influenza A	1	K15045	RSAD2	radical S-adenosyl methionine domain-containing protein 2	GO:0005789;GO:0005811;GO:0051539;GO:0003824;GO:0046872;GO:0051607;GO:0045087;GO:0009615	endoplasmic reticulum membrane|lipid particle|4 iron, 4 sulfur cluster binding|catalytic activity|metal ion binding|defense response to virus|innate immune response|response to virus
comp130481_c0_seq1	141.421	0	282.843	Inf	Inf	0.0212336	1	Up	0	6.14827	1060
comp130514_c0_seq20	398.101	0	796.202	Inf	Inf	0.00254533	0.410115	Up	0	6.21825	2950
comp130539_c0_seq1	243.245	4.24264	482.247	113.667	6.82867	0.0401474	1	Up	0.0741834	4.08026	2725
comp130545_c0_seq1	621.9	17.6777	1226.12	69.36	6.11603	0.0303148	1	Up	1.35806	48.147	587
comp130571_c0_seq21	865.852	23.3345	1708.37	73.2121	6.19401	0.0255662	1	Up	0.47898	17.7997	2212	gi|780017166|ref|XP_011664581.1|PREDICTED: uncharacterized protein LOC756027 [Strongylocentrotus purpuratus]	2e-61	sp|P20825|POL2_DROME	7e-47	Retrovirus-related Pol polyprotein from transposon 297 OS=Drosophila melanogaster GN=pol PE=3 SV=1										GO:0004190;GO:0004519;GO:0003676;GO:0003964;GO:0015074	aspartic-type endopeptidase activity|endonuclease activity|nucleic acid binding|RNA-directed DNA polymerase activity|DNA integration
comp130584_c0_seq8	710.289	1392.29	28.2843	0.0203149	-5.62132	0.0413111	1	Down	10.4256	0.108918	6013
comp130606_c0_seq1	8632.71	51.6188	17213.8	333.479	8.38145	0.0175721	1	Up	0.476717	80.866	4907	gi|331031252|gb|AEC50080.1|alpha-2-macroglobulin [Pacifastacus leniusculus]	0	sp|P14046|A1I3_RAT	0	Alpha-1-inhibitor 3 OS=Rattus norvegicus GN=A1i3 PE=1 SV=1	KOG1366	0	Alpha-macroglobulin	ko04610	Complement and coagulation cascades	1	K03910	A2M	alpha-2-macroglobulin	GO:0005615;GO:0030414;GO:0004867;GO:0006954	extracellular space|peptidase inhibitor activity|serine-type endopeptidase inhibitor activity|inflammatory response
comp130630_c1_seq4	474.115	4.94975	943.28	190.571	7.57419	0.0140339	0.950269	Up	0.0845331	7.73186	2811
comp130639_c0_seq18	119.501	239.002	0	0	#NAME?	0.0444488	1	Down	4.76587	0	2258	gi|646721601|gb|KDR22879.1|Beta-galactosidase [Zootermopsis nevadensis]	7e-168	sp|Q9TRY9|BGAL_CANFA	3e-167	Beta-galactosidase OS=Canis familiaris GN=GLB1 PE=2 SV=3	KOG0496	2e-143	Beta-galactosidase	ko04142;ko00052;ko00511;ko00531;ko00604;ko00600	Lysosome|Galactose metabolism|Other glycan degradation|Glycosaminoglycan degradation|Glycosphingolipid biosynthesis - ganglio series|Sphingolipid metabolism	6	K12309	GLB1, ELNR1	beta-galactosidase	GO:0005764;GO:0004565;GO:0005975	lysosome|beta-galactosidase activity|carbohydrate metabolic process
comp130737_c0_seq1	305.117	610.233	0	0	#NAME?	0.00842937	0.720384	Down	54.4287	0	505
comp130737_c1_seq1	1700.95	27.5772	3374.31	122.359	6.93498	0.0138944	0.945467	Up	1.91607	121.542	640
comp130754_c0_seq4	102.53	0	205.061	Inf	Inf	0.0344852	1	Up	0	3.84541	1226	gi|871215555|ref|XP_012934906.1|PREDICTED: uncharacterized protein LOC101849279 [Aplysia californica]	1e-37	sp|Q61549|AGRE1_MOUSE	4e-21	Adhesion G protein-coupled receptor E1 OS=Mus musculus GN=Adgre1 PE=1 SV=1	KOG4193	5e-19	G protein-coupled receptors							GO:0071944;GO:0009897;GO:0016021;GO:0005886;GO:0005509;GO:0004930;GO:0002250;GO:0007166	cell periphery|external side of plasma membrane|integral component of membrane|plasma membrane|calcium ion binding|G-protein coupled receptor activity|adaptive immune response|cell surface receptor signaling pathway
comp130758_c1_seq1	3193.29	89.0955	6297.49	70.6825	6.14328	0.0287522	1	Up	3.78418	136.837	1061	gi|614461329|gb|AHX39208.1|neuroparsin [Metapenaeus ensis]	4e-29	sp|P10776|NPAB_LOCMI	4e-11	Neuroparsin-A OS=Locusta migratoria PE=1 SV=3										GO:0007218	neuropeptide signaling pathway
comp130782_c1_seq1	207.182	0	414.365	Inf	Inf	0.0104184	0.808316	Up	0	11.8539	805
comp130786_c0_seq1	321.38	7.77817	634.982	81.6364	6.35114	0.0401725	1	Up	0.387083	16.9298	864
comp130787_c0_seq2	1942.42	0	3884.84	Inf	Inf	0.000233458	0.33299	Up	0	51.3818	1743
comp130800_c0_seq3	138.593	277.186	0	0	#NAME?	0.0359843	1	Down	6.13434	0	2036	gi|1022778198|gb|KZS21692.1|Methyltransferase 7A-like protein [Daphnia magna]	5e-31	sp|Q9H8H3|MET7A_HUMAN	7e-30	Methyltransferase-like protein 7A OS=Homo sapiens GN=METTL7A PE=1 SV=1	KOG4300	2e-30	Predicted methyltransferase							GO:0005783;GO:0070062;GO:0005811;GO:0016020;GO:0008757;GO:0032259	endoplasmic reticulum|extracellular exosome|lipid particle|membrane|S-adenosylmethionine-dependent methyltransferase activity|methylation
comp130803_c0_seq1	1354.82	0	2709.63	Inf	Inf	0.000330109	0.33299	Up	0	50.1044	1247
comp130832_c1_seq1	251.023	0	502.046	Inf	Inf	0.00694147	0.656099	Up	0	9.33351	1239
comp130839_c1_seq1	300.52	0	601.041	Inf	Inf	0.00469193	0.541981	Up	0	43.2098	321
comp130851_c3_seq3	1030.61	2061.22	0	0	#NAME?	0.00098231	0.33299	Down	50.1236	0	1852	gi|123458287|ref|XP_001316562.1|viral A-type inclusion protein [Trichomonas vaginalis G3]	3e-12
comp130870_c0_seq1	2406.64	0.707107	4812.57	6806	12.7326	0.000424456	0.33299	Up	0.00878006	29.6355	3744	gi|919095888|ref|XP_013384672.1|PREDICTED: uncharacterized protein LOC106154754 [Lingula anatina]	1e-67	sp|Q8NAG6|ANKL1_HUMAN	4e-54	Ankyrin repeat and LEM domain-containing protein 1 OS=Homo sapiens GN=ANKLE1 PE=2 SV=2
comp130894_c0_seq1	534.573	0	1069.15	Inf	Inf	0.00139596	0.345759	Up	0	12.2507	2012
comp130896_c0_seq2	3973.94	1.41421	7946.47	5619	12.4561	0.000603678	0.33299	Up	0.0276885	75.7247	2419
comp130900_c0_seq6	363.099	4.94975	721.249	145.714	7.187	0.0223544	1	Up	0.053209	4.04805	4107
comp130908_c0_seq1	11871.6	5.65685	23737.6	4196.25	12.0349	0.00503353	0.550233	Up	0.150024	332.46	1646
comp130910_c0_seq11	596.445	0.707107	1192.18	1686	10.7194	0.00230963	0.405276	Up	0.0208445	15.3745	1788
comp130918_c0_seq2	243.245	0	486.489	Inf	Inf	0.00742382	0.680478	Up	0	5.07299	2209
comp130953_c0_seq1	185.969	370.524	1.41421	0.00381679	-8.03342	0.0394312	1	Down	3.66851	0.0094316	4549
comp130960_c0_seq1	77.0746	0	154.149	Inf	Inf	0.0497587	1	Up	0	2.8616	1244
comp131087_c0_seq1	4560.49	72.832	9048.14	124.233	6.9569	0.0202977	1	Up	1.57623	100.133	2083	gi|902942568|gb|AKS25866.1|Fem-1C [Eriocheir sinensis]	2e-78	sp|Q6P9Z4|FEM1A_DANRE	7e-49	Protein fem-1 homolog A OS=Danio rerio GN=fem1a PE=2 SV=1	KOG0508	8e-48	Ankyrin repeat protein							GO:0005737;GO:0004842;GO:0051438	cytoplasm|ubiquitin-protein transferase activity|regulation of ubiquitin-protein transferase activity
comp131090_c0_seq3	184.555	0	369.11	Inf	Inf	0.0131784	0.921562	Up	0	7.80015	1090
comp131095_c0_seq1	125.865	0	251.73	Inf	Inf	0.0255085	1	Up	0	3.24408	1792
comp131099_c0_seq1	292.742	2.82843	582.656	206	7.6865	0.0214854	1	Up	0.168381	17.1816	781
comp131112_c0_seq1	2189.56	7.77817	4371.33	562	9.13443	0.00303674	0.441837	Up	0.150109	43.4957	2317
comp131112_c3_seq1	540.23	4.24264	1076.22	253.667	7.98679	0.00984018	0.779265	Up	0.601527	81.8614	303
comp131112_c5_seq7	115.258	0	230.517	Inf	Inf	0.0291194	1	Up	0	3.84705	1379
comp131126_c0_seq4	220.617	0	441.235	Inf	Inf	0.00913144	0.753209	Up	0	7.93203	1282
comp131132_c1_seq1	662.559	0	1325.12	Inf	Inf	0.000943144	0.33299	Up	0	33.5012	912
comp131168_c0_seq1	154.149	0	308.299	Inf	Inf	0.0183873	1	Up	0	6.77832	1049	gi|646715734|gb|KDR19238.1|hypothetical protein L798_06293 [Zootermopsis nevadensis]	6e-06
comp131203_c0_seq1	17435.5	33.234	34837.7	1048.26	10.0338	0.0258026	1	Up	0.491787	263.831	3044
comp131221_c0_seq1	264.458	1.41421	527.502	373	8.54303	0.0165583	1	Up	0.0475979	8.23785	1477
comp131229_c0_seq1	538.815	1069.15	8.48528	0.00793651	-6.97728	0.0198264	1	Down	20.0032	0.0754968	2407	gi|1005947294|ref|XP_015781958.1|PREDICTED: protein SpAN-like [Tetranychus urticae]	6e-38	sp|P42674|BP10_PARLI	8e-25	Blastula protease 10 OS=Paracentrotus lividus GN=BP10 PE=2 SV=1	KOG3714	1e-16	Meprin A metalloprotease							GO:0005938;GO:0005615;GO:0048471;GO:0004222;GO:0008270	cell cortex|extracellular space|perinuclear region of cytoplasm|metalloendopeptidase activity|zinc ion binding
comp131237_c1_seq20	707.107	31.1127	1383.1	44.4545	5.47426	0.0448493	1	Up	0.682311	15.4558	2063
comp131239_c0_seq1	616.244	2.12132	1230.37	580	9.17991	0.00445661	0.527034	Up	0.101967	34.66	818
comp131243_c0_seq1	161.22	0	322.441	Inf	Inf	0.016998	1	Up	0	7.11742	1045
comp131244_c0_seq1	1302.49	32.5269	2572.45	79.087	6.30537	0.0219915	1	Up	0.965054	38.851	1526
comp131285_c0_seq2	245.72	0.707107	490.732	694	9.43879	0.0134103	0.927585	Up	0.0325687	7.94177	1426
comp131285_c1_seq1	400.222	0	800.445	Inf	Inf	0.00251675	0.410115	Up	0	11.6734	1580
comp131304_c0_seq3	223.092	2.12132	444.063	209.333	7.70966	0.0291718	1	Up	0.0543142	5.22737	1961
comp131305_c0_seq2	2271.58	6.36396	4536.8	712.889	9.47753	0.00243365	0.406158	Up	0.143749	52.9602	1975
comp131306_c0_seq8	925.956	3.53553	1848.38	522.8	9.03012	0.00366373	0.480273	Up	0.0847413	21.2339	2007
comp131333_c0_seq1	760.14	7.07107	1513.21	214	7.74147	0.00925682	0.75778	Up	0.234557	25.0451	1393
comp131373_c0_seq1	2366.33	4684.58	48.0833	0.0102642	-6.60624	0.0187852	1	Down	44.4307	0.235397	4748	gi|926607489|ref|XP_013772835.1|PREDICTED: synaptotagmin-15-like [Limulus polyphemus]	5e-16	sp|P41823|SY65_APLCA	3e-08	Synaptotagmin-1 OS=Aplysia californica GN=SYT1 PE=1 SV=2	KOG1028	5e-08	Ca2+-dependent phospholipid-binding protein Synaptotagmin, required for synaptic vesicle and secretory granule exocytosis							GO:0030054;GO:0030285;GO:0030672;GO:0005509;GO:0000149;GO:0045955;GO:0016079	cell junction|integral component of synaptic vesicle membrane|synaptic vesicle membrane|calcium ion binding|SNARE binding|negative regulation of calcium ion-dependent exocytosis|synaptic vesicle exocytosis
comp131378_c0_seq1	886.712	18.3848	1755.04	95.4615	6.57685	0.0193908	1	Up	0.564649	28.0744	1441
comp131395_c1_seq1	507.349	10.6066	1004.09	94.6667	6.56478	0.0250798	1	Up	1.0117	50.5139	458
comp131396_c0_seq7	107.48	0	214.96	Inf	Inf	0.0322477	1	Up	0	7.32432	677
comp131409_c0_seq1	1506.14	21.2132	2991.06	141	7.13955	0.0119396	0.871095	Up	0.27344	19.5017	3536	gi|1000732019|ref|XP_015588408.1|PREDICTED: neuropeptide Y receptor [Cephus cinctus]	4e-87	sp|P25931|NPYR_DROME	8e-89	Neuropeptide Y receptor OS=Drosophila melanogaster GN=RYa-R PE=2 SV=2	KOG3656	7e-90	FOG: 7 transmembrane receptor							GO:0016021;GO:0005886;GO:0008188;GO:0004983;GO:0001653;GO:0007166;GO:0007186;GO:0007218	integral component of membrane|plasma membrane|neuropeptide receptor activity|neuropeptide Y receptor activity|peptide receptor activity|cell surface receptor signaling pathway|G-protein coupled receptor signaling pathway|neuropeptide signaling pathway
comp131416_c0_seq1	12239	64.3467	24413.6	379.407	8.5676	0.0268078	1	Up	0.585959	114.227	4927	gi|780672975|ref|XP_011695705.1|PREDICTED: serine protease nudel isoform X2 [Wasmannia auropunctata]	1e-90	sp|P98159|NUDEL_DROME	6e-65	Serine protease nudel OS=Drosophila melanogaster GN=ndl PE=1 SV=2	KOG3627	1e-65	Trypsin							GO:0005578;GO:0008233;GO:0004252;GO:0008236;GO:0009950;GO:0007343;GO:0007306;GO:0007313;GO:0007310;GO:0016485;GO:0006508;GO:0008063	proteinaceous extracellular matrix|peptidase activity|serine-type endopeptidase activity|serine-type peptidase activity|dorsal/ventral axis specification|egg activation|eggshell chorion assembly|maternal specification of dorsal/ventral axis, oocyte, soma encoded|oocyte dorsal/ventral axis specification|protein processing|proteolysis|Toll signaling pathway
comp131443_c0_seq3	246.427	2.12132	490.732	231.333	7.85383	0.0243183	1	Up	0.0423293	5.13129	2203
comp131444_c0_seq2	292.035	0	584.07	Inf	Inf	0.00499641	0.548116	Up	0	5.54287	2428
comp131447_c1_seq1	160.16	320.319	0	0	#NAME?	0.0287627	1	Down	6.27023	0	2299
comp131459_c0_seq1	14795.1	4.94975	29585.3	5977.14	12.5452	0.00662447	0.640512	Up	0.109148	334.319	2040	gi|270046092|dbj|BAI50776.1|serine proteinase inhibitor [Marsupenaeus japonicus]	9e-75	sp|Q9CQV3|SPB11_MOUSE	3e-41	Serpin B11 OS=Mus musculus GN=Serpinb11 PE=2 SV=1	KOG2392	2e-36	Serpin	ko05146	Amoebiasis	1	K13963	SERPINB	serpin B	GO:0005737;GO:0005615;GO:0004867;GO:0010951	cytoplasm|extracellular space|serine-type endopeptidase inhibitor activity|negative regulation of endopeptidase activity
comp131463_c0_seq8	6071.22	2.82843	12139.6	4292	12.0674	0.00127154	0.34072	Up	0.163438	402.094	696
comp131464_c0_seq1	1431.54	77.0746	2786	36.1468	5.1758	0.0495738	1	Up	0.779428	14.3811	4467	gi|961121415|ref|XP_014782627.1|PREDICTED: zinc finger protein OZF-like isoform X1 [Octopus bimaculoides]	6e-56	sp|P18729|ZG57_XENLA	5e-61	Gastrula zinc finger protein XlCGF57.1 (Fragment) OS=Xenopus laevis PE=3 SV=1	KOG1721	1e-58	FOG: Zn-finger	ko00310	Lysine degradation	1	K20796	PRDM7_9	histone-lysine N-methyltransferase PRDM7/9	GO:0005634;GO:0003677;GO:0046872;GO:0006355;GO:0006351	nucleus|DNA binding|metal ion binding|regulation of transcription, DNA-templated|transcription, DNA-templated
comp131480_c0_seq1	7202.94	2.12132	14403.8	6790	12.7292	0.0012647	0.34072	Up	0.0747969	262.699	1264
comp131487_c1_seq4	1652.51	1.41421	3303.6	2336	11.1898	0.000865099	0.33299	Up	0.0398372	58.4992	1302
comp131496_c1_seq11	201.879	402.344	1.41421	0.00351494	-8.15228	0.0342397	1	Down	5.68067	0.0111075	3190	gi|919068837|ref|XP_013415894.1|PREDICTED: bone morphogenetic protein 1-like, partial [Lingula anatina]	3e-06				KOG1215	5e-06	Low-density lipoprotein receptors containing Ca2+-binding EGF-like domains
comp131499_c0_seq1	133.643	0	267.286	Inf	Inf	0.0232426	1	Up	0	6.81507	903
comp131505_c0_seq2	514.067	0	1028.13	Inf	Inf	0.0015064	0.357309	Up	0	35.6714	664
comp131505_c1_seq1	687.661	1375.32	0	0	#NAME?	0.00181331	0.378675	Down	35.5563	0	1742
comp131539_c0_seq1	3396.59	2.12132	6791.05	3201.33	11.6445	0.000797239	0.33299	Up	0.0299856	54.584	2868	gi|829186366|ref|XP_001470963.2|RING-type zinc-finger, LisH dimerization motif protein [Tetrahymena thermophila SB210]	5e-08				KOG2177	4e-06	Predicted E3 ubiquitin ligase
comp131575_c0_seq6	6941.67	4.24264	13879.1	3271.33	11.6757	0.00197592	0.379217	Up	0.20593	347.024	922
comp131601_c0_seq4	166.877	0	333.754	Inf	Inf	0.0159693	1	Up	0	7.94625	968
comp131666_c0_seq1	348.957	2.12132	695.793	328	8.35755	0.0125428	0.896219	Up	0.0669661	11.2291	1428
comp131670_c0_seq1	106.773	0	213.546	Inf	Inf	0.032555	1	Up	0	3.52012	1401
comp131697_c2_seq5	30080	7.77817	60152.2	7733.45	12.9169	0.033243	1	Up	0.443401	1805.56	768
comp131711_c0_seq1	2701.5	9.19239	5393.81	586.769	9.19665	0.00314214	0.447616	Up	0.252166	74.4524	1670
comp131732_c1_seq8	6911.62	181.726	13641.5	75.0661	6.23009	0.0459157	1	Up	7.77397	298.351	1054
comp131748_c0_seq1	184.908	0.707107	369.11	522	9.02791	0.0232893	1	Up	0.0214414	4.352	1957	gi|675367443|gb|KFM60345.1|PiggyBac transposable element-derived protein 2, partial [Stegodyphus mimosarum]	6e-78	sp|Q8N328|PGBD3_HUMAN	1e-50	PiggyBac transposable element-derived protein 3 OS=Homo sapiens GN=PGBD3 PE=2 SV=3
comp131754_c0_seq2	262.69	519.723	5.65685	0.0108844	-6.5216	0.0475451	1	Down	10.1678	0.0546207	2301	gi|913295657|ref|XP_013199885.1|PREDICTED: uncharacterized protein LOC106142604 [Amyelois transitella]	9e-47
comp131755_c0_seq1	2915.4	5829.39	1.41421	0.000242601	-12.0091	0.000815284	0.33299	Down	100.085	0.0116223	2623	gi|585692655|ref|XP_006821491.1|PREDICTED: protein SpAN-like [Saccoglossus kowalevskii]	4e-21	sp|P98068|SPAN_STRPU	1e-20	Protein SpAN OS=Strongylocentrotus purpuratus GN=SPAN PE=2 SV=1	KOG3714	1e-13	Meprin A metalloprotease							GO:0004222;GO:0008270;GO:0007275	metalloendopeptidase activity|zinc ion binding|multicellular organismal development
comp131759_c0_seq1	1134.91	0	2269.81	Inf	Inf	0.000411057	0.33299	Up	0	30.7847	1700
comp131778_c0_seq1	800.091	4.94975	1595.23	322.286	8.3322	0.00613427	0.610299	Up	0.0613504	9.50289	3870	gi|21358765|gb|AAM47019.1|dopamine beta hydroxylase [Homarus americanus]	1e-136	sp|Q9VUY0|MOX11_DROME	7e-115	MOXD1 homolog 1 OS=Drosophila melanogaster GN=CG5235 PE=2 SV=2	KOG3568	7e-110	Dopamine beta-monooxygenase							GO:0005576;GO:0005507;GO:0016715	extracellular region|copper ion binding|oxidoreductase activity, acting on paired donors, with incorporation or reduction of molecular oxygen, reduced ascorbate as one donor, and incorporation of one atom of oxygen
comp131795_c0_seq1	381.838	0	763.675	Inf	Inf	0.00278245	0.423536	Up	0	19.485	904
comp131814_c0_seq5	377.241	3.53553	750.947	212.4	7.73064	0.0158968	1	Up	0.0514872	5.14267	3367	gi|375173474|gb|AFA42360.1|clip domain serine proteinase 2 [Portunus trituberculatus]	4e-54	sp|P05049|SNAK_DROME	2e-23	Serine protease snake OS=Drosophila melanogaster GN=snk PE=1 SV=2	KOG3627	5e-24	Trypsin							GO:0005576;GO:0008233;GO:0004252;GO:0008236;GO:0009950;GO:0007311;GO:0016485;GO:0006508;GO:0008063	extracellular region|peptidase activity|serine-type endopeptidase activity|serine-type peptidase activity|dorsal/ventral axis specification|maternal specification of dorsal/ventral axis, oocyte, germ-line encoded|protein processing|proteolysis|Toll signaling pathway
comp131818_c0_seq5	816.001	1630.59	1.41421	0.000867303	-10.1712	0.00285244	0.428983	Down	10.3084	0.00531504	7125	gi|939278822|ref|XP_014259970.1|PREDICTED: long-chain-fatty-acid--CoA ligase 4-like isoform X2 [Cimex lectularius]	3e-161	sp|O60488|ACSL4_HUMAN	6e-143	Long-chain-fatty-acid--CoA ligase 4 OS=Homo sapiens GN=ACSL4 PE=1 SV=2	KOG1180	3e-167	Acyl-CoA synthetase	ko02024;ko04146;ko00061;ko00071;ko01212;ko03320;ko04920	Quorum sensing|Peroxisome|Fatty acid biosynthesis|Fatty acid degradation|Fatty acid metabolism|PPAR signaling pathway|Adipocytokine signaling pathway	7	K01897	ACSL, fadD	long-chain acyl-CoA synthetase	GO:0005737;GO:0005789;GO:0044233;GO:0070062;GO:0016021;GO:0005811;GO:0016020;GO:0005741;GO:0043025;GO:0005778;GO:0047676;GO:0005524;GO:0004467;GO:0031957;GO:0044255;GO:0060996;GO:0060136;GO:0015908;GO:0008610;GO:0006629;GO:0001676;GO:0035338;GO:0032307;GO:0030307;GO:0070672;GO:0007584;GO:0044281;GO:0019432	cytoplasm|endoplasmic reticulum membrane|ER-mitochondrion membrane contact site|extracellular exosome|integral component of membrane|lipid particle|membrane|mitochondrial outer membrane|neuronal cell body|peroxisomal membrane|arachidonate-CoA ligase activity|ATP binding|long-chain fatty acid-CoA ligase activity|very long-chain fatty acid-CoA ligase activity|cellular lipid metabolic process|dendri…
comp131850_c0_seq1	195.869	0	391.737	Inf	Inf	0.0116959	0.858274	Up	0	10.4579	863
comp131864_c0_seq1	1361.89	0	2723.78	Inf	Inf	0.000328136	0.33299	Up	0	26.9305	2332
comp131905_c1_seq2	1910.96	3.53553	3818.38	1080	10.0768	0.00160224	0.365346	Up	0.0420021	25.3133	3477
comp131907_c0_seq3	403.758	9.89949	797.616	80.5714	6.3322	0.0339289	1	Up	0.264078	10.8545	1695
comp131948_c0_seq1	5015.15	16.2635	10014	615.739	9.26618	0.00493287	0.547995	Up	0.233935	72.6179	3179	gi|403362626|gb|EJY81042.1|Protein-L-isoaspartate O-methyltransferase [Oxytricha trifallax]	1e-10				KOG2177	4e-06	Predicted E3 ubiquitin ligase
comp131981_c0_seq1	2867.67	40.3051	5695.04	141.298	7.1426	0.0135747	0.931045	Up	0.661861	47.8656	2743
comp131986_c0_seq1	12529.2	151.321	24907.1	164.598	7.3628	0.0490074	1	Up	1.13707	96.0154	5980	gi|919093602|ref|XP_013383634.1|PREDICTED: uncharacterized protein LOC106153994 [Lingula anatina]	1e-32
comp131992_c0_seq1	688.015	12.7279	1363.3	107.111	6.74296	0.018971	1	Up	0.541042	29.7455	1057
comp131999_c0_seq1	356.735	2.12132	711.349	335.333	8.38945	0.0120228	0.872997	Up	0.0558497	8.50741	1929
comp132064_c0_seq6	423.911	4.94975	842.871	170.286	7.41181	0.0170271	1	Up	0.135899	12.0944	1607
comp132081_c2_seq1	5944.65	140.007	11749.3	83.9192	6.39093	0.0363153	1	Up	1.73833	74.6363	3629
comp132086_c0_seq1	180.312	0	360.624	Inf	Inf	0.0137927	0.940233	Up	0	7.44658	1117
comp132109_c0_seq1	582.302	4.94975	1159.66	234.286	7.87213	0.00997159	0.786562	Up	0.119624	14.6632	1824
comp132131_c0_seq2	926.663	4.94975	1848.38	373.429	8.54469	0.00497875	0.547995	Up	0.198545	39.9408	1067
comp132166_c0_seq3	659.024	7.07107	1310.98	185.4	7.5345	0.0114365	0.848648	Up	0.140346	13.9518	2167	gi|1009372755|gb|KYM96707.1|hypothetical protein ALC62_12624, partial [Cyphomyrmex costatus]	2e-106	sp|O60290|ZN862_HUMAN	3e-07	Zinc finger protein 862 OS=Homo sapiens GN=ZNF862 PE=2 SV=2										GO:0005634;GO:0046872;GO:0003676;GO:0006355;GO:0006351	nucleus|metal ion binding|nucleic acid binding|regulation of transcription, DNA-templated|transcription, DNA-templated
comp132195_c0_seq1	946.462	26.163	1866.76	71.3514	6.15687	0.0256711	1	Up	0.314287	11.5063	3741
comp132205_c0_seq1	404.465	808.93	0	0	#NAME?	0.00477004	0.543741	Down	13.847	0	2630
comp132222_c3_seq15	1823.27	3.53553	3643.01	1030.4	10.009	0.00166821	0.369758	Up	0.256261	135.039	622
comp132271_c0_seq1	515.481	19.799	1011.16	51.0714	5.67444	0.0443979	1	Up	0.259516	6.69133	3482
comp132288_c3_seq2	4879.74	141.421	9618.07	68.01	6.08767	0.0377244	1	Up	4.82801	168.342	1317
comp132292_c0_seq6	296.985	0	593.97	Inf	Inf	0.00481548	0.545748	Up	0	13.118	1045
comp132318_c0_seq2	423.911	842.164	5.65685	0.00671704	-7.21796	0.021007	1	Down	6.82219	0.0238898	5559	gi|356651196|gb|AET34915.1|heat shock protein 21 [Macrobrachium rosenbergii]	7e-15
comp132329_c0_seq1	528.562	3.53553	1053.59	298	8.21917	0.00873345	0.738873	Up	0.112016	16.3439	1486
comp132357_c0_seq2	299.106	592.555	5.65685	0.00954654	-6.71081	0.0382074	1	Down	13.1317	0.0698441	2032
comp132358_c0_seq2	383.959	5.65685	762.261	134.75	7.07414	0.0226595	1	Up	0.0744637	4.94303	3556
comp132371_c0_seq11	1331.84	10.6066	2653.06	250.133	7.96655	0.0066654	0.642013	Up	0.277618	35.1725	1739
comp132372_c0_seq4	600.334	11.3137	1189.35	105.125	6.71596	0.0206161	1	Up	0.206105	11.3985	2406
comp132374_c0_seq1	1151.88	45.2548	2258.5	49.9062	5.64115	0.0359416	1	Up	1.36665	34.7543	1498
comp132376_c0_seq7	1606.19	9.19239	3203.19	348.462	8.44486	0.00471117	0.541981	Up	0.375087	68.1925	1083
comp132395_c0_seq1	933.381	25.4558	1841.31	72.3333	6.17659	0.0253951	1	Up	0.496251	18.2912	2321
comp132402_c0_seq1	2245.06	1.41421	4488.71	3174	11.6321	0.000677857	0.33299	Up	0.0479964	74.1699	1395
comp132410_c1_seq1	131.522	0	263.044	Inf	Inf	0.0238329	1	Up	0	9.51141	636
comp132410_c2_seq1	10107.4	8.48528	20206.3	2381.33	11.2176	0.00532704	0.566652	Up	0.326358	411.854	1131
comp132413_c0_seq1	4517.71	2.82843	9032.58	3193.5	11.6409	0.0010432	0.334829	Up	0.0795346	127.587	1632
comp132418_c0_seq4	1590.28	0	3180.57	Inf	Inf	0.000277995	0.33299	Up	0	39.937	1836
comp132421_c0_seq1	759.786	2.12132	1517.45	715.333	9.48247	0.00318911	0.451021	Up	0.0519121	20.1881	1733
comp132428_c0_seq1	1357.65	1.41421	2713.88	1919	10.9061	0.00106448	0.334829	Up	0.0615915	65.5092	955
comp132435_c0_seq2	1304.61	16.9706	2592.25	152.75	7.25503	0.0110769	0.834537	Up	0.374862	29.8665	2001
comp132454_c0_seq1	129.754	259.508	0	0	#NAME?	0.0395993	1	Down	5.49962	0	2126
comp132466_c1_seq1	8843.43	12.0208	17674.8	1470.35	10.5219	0.0057814	0.59384	Up	0.263469	198.182	2056
comp132468_c0_seq13	875.045	27.5772	1722.51	62.4615	5.9649	0.0299699	1	Up	0.775839	24.5053	1621
comp132480_c0_seq2	194.101	388.202	0	0	#NAME?	0.0205277	1	Down	7.14294	0	2449
comp132489_c0_seq1	13512.5	94.0452	26930.9	286.361	8.16169	0.0374009	1	Up	0.715318	104.834	5922	gi|301070472|gb|ADK55596.1|vitellogenin receptor [Macrobrachium rosenbergii]	0	sp|P98163|YL_DROME	0	Putative vitellogenin receptor OS=Drosophila melanogaster GN=yl PE=1 SV=2	KOG1215	0	Low-density lipoprotein receptors containing Ca2+-binding EGF-like domains							GO:0030135;GO:0031410;GO:0016021;GO:0005886;GO:0005509;GO:0008196;GO:0048477;GO:0006898	coated vesicle|cytoplasmic vesicle|integral component of membrane|plasma membrane|calcium ion binding|vitellogenin receptor activity|oogenesis|receptor-mediated endocytosis
comp132524_c0_seq5	1046.87	45.9619	2047.78	44.5538	5.47748	0.0409118	1	Up	0.612234	14.0255	3365
comp132544_c0_seq1	327.39	0	654.781	Inf	Inf	0.00388726	0.498596	Up	0	9.33023	1617
comp132551_c0_seq1	171.12	0	342.24	Inf	Inf	0.0152424	0.995178	Up	0	4.27391	1849
comp132575_c0_seq1	244.659	0	489.318	Inf	Inf	0.00733284	0.674586	Up	0	11.4891	982
comp132588_c0_seq1	278.247	552.25	4.24264	0.00768246	-7.02422	0.0354355	1	Down	7.21457	0.0245531	3446
comp132606_c0_seq9	562.503	3.53553	1121.47	317.2	8.30925	0.0078628	0.690651	Up	0.0776101	13.0878	1975
comp132616_c1_seq8	2061.57	53.033	4070.11	76.7467	6.26203	0.0231794	1	Up	3.24953	127.29	737
comp132639_c0_seq1	1528.41	3055.41	1.41421	0.000462856	-11.0771	0.00127542	0.34072	Down	44.107	0.00784568	3120	gi|674590241|emb|CDS30906.1|phosphoglycerate mutase [Hymenolepis microstoma]	2e-07				KOG3734	4e-06	Predicted phosphoglycerate mutase
comp132652_c0_seq1	187.737	375.474	0	0	#NAME?	0.0218307	1	Down	3.51449	0	4812	gi|21464370|gb|AAM51988.1|RE10344p [Drosophila melanogaster]	2e-09	sp|Q8MRC9|GALT9_DROME	6e-11	Putative polypeptide N-acetylgalactosaminyltransferase 9 OS=Drosophila melanogaster GN=pgant9 PE=2 SV=2	KOG3736	3e-12	Polypeptide N-acetylgalactosaminyltransferase	ko00512	Mucin type O-glycan biosynthesis	1	K00710	GALNT	polypeptide N-acetylgalactosaminyltransferase	GO:0005829;GO:0005794;GO:0031985;GO:0000139;GO:0016021;GO:0030246;GO:0046872;GO:0004653;GO:0032504;GO:0006493	cytosol|Golgi apparatus|Golgi cisterna|Golgi membrane|integral component of membrane|carbohydrate binding|metal ion binding|polypeptide N-acetylgalactosaminyltransferase activity|multicellular organism reproduction|protein O-linked glycosylation
comp132653_c0_seq2	736.805	35.3553	1438.26	40.68	5.34625	0.0483965	1	Up	3.61329	74.4969	445
comp132663_c0_seq1	1725.34	3432.3	18.3848	0.00535641	-7.54452	0.00923791	0.75778	Down	24.3729	0.0642593	6342	gi|1009577011|ref|XP_015920157.1|PREDICTED: uncharacterized protein DDB_G0290685-like [Parasteatoda tepidariorum]	1e-18
comp132666_c0_seq3	5830.1	32.5269	11627.7	357.478	8.48171	0.00967236	0.770982	Up	1.44319	266.731	1005
comp132671_c1_seq1	3521.75	17.6777	7025.81	397.44	8.63459	0.00539802	0.573097	Up	0.264227	54.2996	2983	gi|383854636|ref|XP_003702826.1|PREDICTED: SET and MYND domain-containing protein 4-like [Megachile rotundata]	5e-30	sp|P38890|SET5_YEAST	5e-08	Putative protein lysine methyltransferase SET5 OS=Saccharomyces cerevisiae (strain ATCC 204508 / S288c) GN=SET5 PE=1 SV=1	KOG2084	1e-17	Predicted histone tail methylase containing SET domain							GO:0005737;GO:0000790;GO:0008757;GO:0034968	cytoplasm|nuclear chromatin|S-adenosylmethionine-dependent methyltransferase activity|histone lysine methylation
comp132702_c0_seq3	1035.2	2068.99	1.41421	0.0001463	-10.5147	0.00149591	0.356591	Down	7.65496	0.00866316	6230	gi|1012981176|gb|KYQ55071.1|Insulin-like receptor [Trachymyrmex zeteki]	0	sp|P08069|IGF1R_HUMAN	3e-176	Insulin-like growth factor 1 receptor OS=Homo sapiens GN=IGF1R PE=1 SV=1	KOG4258	7e-177	Insulin/growth factor receptor (contains protein kinase domain)	ko04520;ko04014;ko04015;ko04022;ko04066;ko04068;ko04072;ko04150;ko04151;ko04152;ko04930;ko04931;ko04932;ko04211;ko04212;ko04213;ko04910;ko04913;ko04923;ko04960	Adherens junction|Ras signaling pathway|Rap1 signaling pathway|cGMP - PKG signaling pathway|HIF-1 signaling pathway|FoxO signaling pathway|Phospholipase D signaling pathway|mTOR signaling pathway|PI3K-Akt signaling pathway|AMPK signaling pathway|Type II diabetes mellitus|Insulin resistance|Non-alcoholic fatty liver disease (NAFLD)|Longevity regulating pathway - mammal|Longevity regulating pathway…	20	K04527	INSR, CD220	insulin receptor
comp132704_c0_seq2	269.408	0	538.815	Inf	Inf	0.00595906	0.605567	Up	0	3.42016	3633
comp132736_c0_seq5	567.453	3.53553	1131.37	320	8.32193	0.00774892	0.690265	Up	0.0831899	13.5314	1927
comp132766_c1_seq1	8132.79	16262.7	2.82843	0.000173921	-12.4893	0.00208446	0.386333	Down	1282.63	0.137151	571	gi|403349352|gb|EJY74115.1|hypothetical protein OXYTRI_04629 [Oxytricha trifallax]	5e-06
comp132766_c2_seq1	961.665	1923.33	0	0	#NAME?	0.001082	0.33753	Down	100.359	0	863
comp132770_c1_seq1	584.07	21.2132	1146.93	54.0667	5.75667	0.0396699	1	Up	0.120791	3.32329	7952	gi|926614109|ref|XP_013772088.1|PREDICTED: uncharacterized protein LOC106457239 [Limulus polyphemus]	3e-32
comp132775_c0_seq3	930.199	16.2635	1844.13	113.391	6.82517	0.0160597	1	Up	0.395961	22.9152	1855
comp132793_c0_seq1	93.3381	0	186.676	Inf	Inf	0.0392116	1	Up	0	13.9759	309
comp132824_c0_seq1	830.85	0	1661.7	Inf	Inf	0.000646786	0.33299	Up	0	49.0496	781
comp132824_c1_seq1	4842.62	17.6777	9667.56	546.88	9.09508	0.00528923	0.565507	Up	0.239528	68.1079	3272	gi|321476851|gb|EFX87811.1|hypothetical protein DAPPUDRAFT_96576 [Daphnia pulex]	4e-56	sp|W4VS53|CRVP_TRILK	2e-47	CRISP/Allergen/PR-1 OS=Trittame loki PE=1 SV=1	KOG3017	2e-29	Defense-related protein containing SCP domain							GO:0005576	extracellular region
comp132831_c0_seq1	186.676	0	373.352	Inf	Inf	0.0128835	0.909334	Up	0	27.1011	317
comp132844_c0_seq1	310.066	617.304	2.82843	0.0045819	-7.76984	0.0225392	1	Down	7.93482	0.0141701	3503	gi|939245574|ref|XP_014242166.1|PREDICTED: vigilin [Cimex lectularius]	9e-10
comp132861_c0_seq2	1050.41	21.9203	2078.89	94.8387	6.5674	0.0187382	1	Up	0.352813	17.0211	2815	gi|21358765|gb|AAM47019.1|dopamine beta hydroxylase [Homarus americanus]	1e-135	sp|Q9VUY0|MOX11_DROME	6e-113	MOXD1 homolog 1 OS=Drosophila melanogaster GN=CG5235 PE=2 SV=2	KOG3568	6e-112	Dopamine beta-monooxygenase							GO:0005576;GO:0005507;GO:0016715	extracellular region|copper ion binding|oxidoreductase activity, acting on paired donors, with incorporation or reduction of molecular oxygen, reduced ascorbate as one donor, and incorporation of one atom of oxygen
comp132865_c0_seq4	771.453	0	1542.91	Inf	Inf	0.000729068	0.33299	Up	0	25.3154	1405
comp132941_c0_seq2	1469.72	57.2756	2882.17	50.321	5.65309	0.035129	1	Up	0.616867	15.9816	4158	gi|913312504|ref|XP_013186982.1|PREDICTED: teneurin-3 isoform X2 [Amyelois transitella]	1e-75	sp|O61307|TENM_DROME	3e-77	Teneurin-m OS=Drosophila melanogaster GN=Ten-m PE=1 SV=2	KOG4659	2e-78	Uncharacterized conserved protein (Rhs family)							GO:0030054;GO:0005737;GO:0005887;GO:0031594;GO:0043005;GO:0043025;GO:0005886;GO:0045211;GO:0005578;GO:0031005;GO:0042802;GO:0046982;GO:0042803;GO:0007155;GO:0022416;GO:0048058;GO:0001745;GO:0042051;GO:0031122;GO:0048790;GO:0008045;GO:0007274;GO:0034116;GO:0040017;GO:0001941;GO:0097090;GO:0045467;GO:0008360;GO:0034110;GO:2000331;GO:0050808;GO:0051124;GO:0016200;GO:0008039;GO:0048499	cell junction|cytoplasm|integral component of plasma membrane|neuromuscular junction|neuron projection|neuronal cell body|plasma membrane|postsynaptic membrane|proteinaceous extracellular matrix|filamin binding|identical protein binding|protein heterodimerization activity|protein homodimerization activity|cell adhesion|chaeta development|compound eye corneal lens development|compound eye morphoge…
comp132946_c0_seq3	2412.29	84.1457	4740.44	56.3361	5.81599	0.0330163	1	Up	2.27242	65.3949	1671
comp132966_c0_seq2	1573.67	24.7487	3122.58	126.171	6.97924	0.0134113	0.927585	Up	0.540898	34.745	2072
comp132982_c0_seq53	541.29	0.707107	1081.87	1530	10.5793	0.00275037	0.420341	Up	0.0242327	15.4612	1613
comp132994_c0_seq4	171.12	0	342.24	Inf	Inf	0.0152424	0.995178	Up	0	6.77952	1164
comp133006_c0_seq3	1906.01	2.12132	3809.89	1796	10.8106	0.00103782	0.33477	Up	0.0298966	32.385	2712
comp133012_c0_seq4	654.427	3.53553	1305.32	369.2	8.52826	0.00615615	0.611573	Up	0.064875	11.8134	2548
comp133013_c0_seq1	739.987	20.5061	1459.47	71.1724	6.15325	0.0276302	1	Up	0.246343	8.82649	3812	gi|913309614|ref|XP_013185402.1|PREDICTED: cubilin [Amyelois transitella]	1e-06
comp133013_c1_seq1	556.493	11.3137	1101.67	97.375	6.60548	0.0231108	1	Up	0.822867	42.0613	604
comp133035_c0_seq1	1143.04	2229.51	56.5685	0.0253727	-5.30058	0.046334	1	Down	28.3483	0.369088	3542	gi|557240360|emb|CDJ35613.1|hypothetical protein, conserved [Eimeria mitis]	6e-14
comp133045_c1_seq2	377.241	4.94975	749.533	151.429	7.24249	0.0208947	1	Up	0.101804	7.79853	2214
comp133049_c1_seq4	1952.32	12.7279	3891.92	305.778	8.25634	0.0054603	0.574081	Up	0.686125	109.95	816
comp133057_c1_seq11	229.81	0	459.619	Inf	Inf	0.00837512	0.716555	Up	0	5.3132	1993
comp133090_c1_seq5	5538.41	10.6066	11066.2	1043.33	10.027	0.00348762	0.472281	Up	0.403912	209.288	1219
comp133109_c0_seq1	3051.87	74.9533	6028.79	80.434	6.32973	0.0247548	1	Up	1.39649	57.4087	2421	gi|572303549|ref|XP_006617759.1|PREDICTED: mucin-12-like [Apis dorsata]	6e-06
comp133118_c0_seq2	1149.4	3.53553	2295.27	649.2	9.34252	0.00274813	0.420341	Up	0.074995	24.6058	2151
comp133134_c1_seq2	12487.9	4.94975	24970.8	5044.86	12.3006	0.00497993	0.547995	Up	0.0919162	243.708	2362
comp133136_c0_seq2	150.26	0.707107	299.813	424	8.72792	0.0331815	1	Up	0.0450584	7.05865	981
comp133144_c0_seq9	143.543	0	287.085	Inf	Inf	0.0207241	1	Up	0	5.96293	1110	gi|908450492|ref|XP_013082132.1|PREDICTED: uncharacterized protein LOC106067494 [Biomphalaria glabrata]	2e-08
comp133162_c0_seq2	458.205	14.1421	902.268	63.8	5.99548	0.0384894	1	Up	0.361247	11.529	1805
comp133164_c0_seq1	731.148	25.4558	1436.84	56.4444	5.81876	0.0349769	1	Up	0.38559	11.2801	2935	gi|1008441667|ref|XP_015836142.1|PREDICTED: cysteine-rich secretory protein 2 isoform X2 [Tribolium castaneum]	2e-53	sp|P16562|CRIS2_HUMAN	5e-34	Cysteine-rich secretory protein 2 OS=Homo sapiens GN=CRISP2 PE=1 SV=1	KOG3017	1e-34	Defense-related protein containing SCP domain							GO:0005615;GO:0016337	extracellular space|single organismal cell-cell adhesion
comp133167_c0_seq1	2917.17	21.9203	5812.42	265.161	8.05073	0.00721145	0.665842	Up	0.467507	62.6149	2140
comp133173_c0_seq1	125.158	0	250.316	Inf	Inf	0.0257292	1	Up	0	4.19773	1378	gi|943964056|ref|XP_014364293.1|PREDICTED: uncharacterized protein LOC106715505 [Papilio machaon]	1e-13
comp133190_c1_seq9	929.138	21.2132	1837.06	86.6	6.4363	0.0211455	1	Up	0.404359	17.8324	2374
comp133200_c1_seq7	1078.34	8.48528	2148.19	253.167	7.98394	0.00686573	0.653011	Up	0.181581	22.8349	2169	gi|669314262|gb|KFD57715.1|hypothetical protein M513_01385 [Trichuris suis]	2e-49
comp133226_c0_seq10	590.434	5.65685	1175.21	207.75	7.6987	0.0110062	0.830986	Up	0.20349	22.4382	1208
comp133248_c0_seq3	329.158	651.245	7.07107	0.0108578	-6.52513	0.0383619	1	Down	5.06324	0.0267545	5790
comp133251_c0_seq2	5788.73	3.53553	11573.9	3273.6	11.6767	0.00144169	0.348044	Up	0.0627707	103.811	2570
comp133257_c1_seq8	126.219	252.437	0	0	#NAME?	0.0411835	1	Down	4.4313	0	2562
comp133284_c0_seq1	4348.35	19.0919	8677.61	454.519	8.8282	0.00563828	0.583885	Up	0.278824	65.4784	3055
comp133291_c0_seq1	365.928	724.784	7.07107	0.0097561	-6.67948	0.0320996	1	Down	7.85621	0.0381796	4156	gi|195163455|ref|XP_002022565.1|GL13104 [Drosophila persimilis]	5e-10	sp|P97738|NPTX2_RAT	1e-07	Neuronal pentraxin-2 OS=Rattus norvegicus GN=Nptx2 PE=1 SV=1	KOG3644	1e-11	Ligand-gated ion channel							GO:0005576;GO:0030246;GO:0046872	extracellular region|carbohydrate binding|metal ion binding
comp133303_c0_seq29	235.113	2.82843	467.398	160.006	7.36851	0.0369112	1	Up	0.0115984	3.59638	5851	gi|761918468|ref|XP_011408177.1|PREDICTED: ankyrin-3-like [Amphimedon queenslandica]	8e-38	sp|O15084|ANR28_HUMAN	9e-37	Serine/threonine-protein phosphatase 6 regulatory ankyrin repeat subunit A OS=Homo sapiens GN=ANKRD28 PE=1 SV=5	KOG4177	2e-29	Ankyrin	ko05205;ko04624	Proteoglycans in cancer|Toll and Imd signaling pathway	2	K10380	ANK	ankyrin	GO:0005654	nucleoplasm
comp133317_c0_seq12	125.865	251.73	0	0	#NAME?	0.0413468	1	Down	3.53764	0	3204	gi|443700783|gb|ELT99590.1|hypothetical protein CAPTEDRAFT_224082 [Capitella teleta]	5e-86	sp|Q99LB7|SARDH_MOUSE	7e-88	Sarcosine dehydrogenase, mitochondrial OS=Mus musculus GN=Sardh PE=1 SV=1	KOG2844	1e-86	Dimethylglycine dehydrogenase precursor	ko00260	Glycine, serine and threonine metabolism	1	K00314	SARDH	sarcosine dehydrogenase	GO:0005759;GO:0005739;GO:0050660;GO:0005542;GO:0008480;GO:0035999	mitochondrial matrix|mitochondrion|flavin adenine dinucleotide binding|folic acid binding|sarcosine dehydrogenase activity|tetrahydrofolate interconversion
comp133332_c0_seq1	631.8	27.5772	1236.02	44.8205	5.48609	0.0461814	1	Up	0.75716	17.3907	1638
comp133366_c1_seq3	7778.88	5.65685	15552.1	2749.25	11.4248	0.00279484	0.42372	Up	0.124569	166.753	2150
comp133372_c0_seq1	282.843	4.24264	561.443	132.333	7.04803	0.0308699	1	Up	0.0964841	6.99218	1852	gi|918335311|gb|KOF97383.1|hypothetical protein OCBIM_22030014mg [Octopus bimaculoides]	8e-11
comp133382_c0_seq1	1352.7	2678.52	26.8701	0.0100317	-6.63929	0.0175714	1	Down	22.6209	0.117333	5333
comp133405_c0_seq3	1197.84	24.0416	2371.64	98.6471	6.6242	0.0176114	1	Up	0.337244	16.7843	3257
comp133495_c0_seq3	1988.38	42.4264	3934.34	92.7333	6.53502	0.0189052	1	Up	0.863196	41.0082	2212
comp133502_c0_seq2	6989.04	0	13978.1	Inf	Inf	0.000351644	0.33299	Up	0	81.9755	3931
comp133512_c0_seq2	188.444	376.888	0	0	#NAME?	0.0216809	1	Down	16.796	0	1011
comp133536_c0_seq2	180.312	0	360.624	Inf	Inf	0.0137927	0.940233	Up	0	20.3413	408
comp133552_c0_seq2	734.684	32.5269	1436.84	44.1739	5.46512	0.0446141	1	Up	0.727322	16.5875	1996
comp133633_c2_seq4	971.918	1941.01	2.82843	0.00145719	-9.42259	0.00341285	0.468523	Down	81.7813	0.0686006	1069	gi|471233079|ref|XP_004037588.1|hypothetical protein IMG5_048190 [Ichthyophthirius multifiliis]	1e-06
comp133647_c0_seq13	205.768	0	411.536	Inf	Inf	0.0105678	0.816596	Up	0	6.93351	1368
comp133652_c0_seq2	136.472	0	272.943	Inf	Inf	0.0224849	1	Up	0	5.35922	1172	gi|805807592|ref|XP_012146362.1|PREDICTED: LOW QUALITY PROTEIN: uncharacterized protein LOC105663250 [Megachile rotundata]	2e-38
comp133654_c0_seq1	1814.08	0.707107	3627.46	5130	12.3247	0.000514577	0.33299	Up	0.0266875	52.405	1596
comp133682_c0_seq1	393.505	787.01	0	0	#NAME?	0.00503749	0.550233	Down	29.3698	0	1207
comp133686_c0_seq1	274.711	549.422	0	0	#NAME?	0.0104286	0.808316	Down	53.3187	0	464
comp133686_c1_seq1	329.865	659.731	0	0	#NAME?	0.00719097	0.664762	Down	58.6178	0	507
comp133701_c0_seq3	185.262	2.82843	367.696	130	7.02237	0.0482977	1	Up	0.147782	10.4332	812
comp133725_c1_seq3	418.607	831.558	5.65685	0.00680272	-7.19967	0.0214616	1	Down	10.2975	0.0386075	3637	gi|743404058|emb|CEF34378.1|Variant Ionotropic Glutamate Receptor [Coenobita clypeatus]	8e-64				KOG1052	5e-10	Glutamate-gated kainate-type ion channel receptor subunit GluR5 and related subunits
comp133768_c0_seq2	1257.59	24.7487	2490.43	100.629	6.6529	0.0171542	1	Up	0.547311	28.1227	2042
comp133815_c0_seq2	475.529	10.6066	940.452	88.6667	6.47032	0.0277765	1	Up	0.331217	15.268	1421
comp133836_c1_seq2	745.291	14.1421	1476.44	104.4	6.70598	0.018814	1	Up	0.44182	23.753	1433
comp133852_c1_seq1	853.831	4.94975	1702.71	344	8.42626	0.00558468	0.582944	Up	0.174693	30.251	1298
comp133859_c0_seq1	479.065	16.2635	941.866	57.913	5.85582	0.0410156	1	Up	0.337241	10.0865	2152
comp133861_c0_seq2	84.8528	0	169.706	Inf	Inf	0.044316	1	Up	0	7.80854	499
comp133865_c0_seq3	520.431	0	1040.86	Inf	Inf	0.00147054	0.353883	Up	0	34.4058	697
comp133920_c0_seq1	1435.78	2853.18	18.3848	0.00644362	-7.27791	0.0111699	0.83751	Down	41.5122	0.136607	3095
comp133923_c0_seq1	744.583	1472.2	16.9706	0.0115274	-6.43879	0.0234333	1	Down	10.8059	0.0624869	6137	gi|939691086|ref|XP_014289552.1|PREDICTED: uncharacterized protein LOC106689189 [Halyomorpha halys]	3e-60
comp133926_c1_seq1	264.458	526.087	2.82843	0.00537634	-7.53916	0.0300412	1	Down	5.20306	0.0140321	4555	gi|170038293|ref|XP_001846986.1|conserved hypothetical protein [Culex quinquefasciatus]	1e-83
comp133930_c0_seq1	384.313	765.797	2.82843	0.00369344	-8.08082	0.0152293	0.995178	Down	10.3368	0.0176776	3335
comp133960_c0_seq1	333.047	9.89949	656.195	66.2857	6.05063	0.046438	1	Up	0.249771	8.39304	1802
comp133978_c0_seq6	18090.3	36174.9	5.65685	0.000156375	-12.6427	0.0108332	0.82481	Down	810.506	0.0694185	2010	gi|123421285|ref|XP_001305956.1|viral A-type inclusion protein [Trichomonas vaginalis G3]	4e-13
comp133980_c0_seq1	693.318	0.707107	1385.93	1960	10.9366	0.00178852	0.377652	Up	0.0107888	9.73111	3284
comp133996_c0_seq2	3233.25	54.4472	6412.04	117.766	6.87978	0.0172731	1	Up	0.571714	34.5346	4280
comp134014_c0_seq1	546.947	0.707107	1093.19	1546	10.5943	0.00269835	0.420164	Up	0.0146597	8.05419	3127
comp134018_c0_seq1	718.774	28.9914	1408.56	48.5854	5.60245	0.0408447	1	Up	0.469363	11.5779	2804
comp134036_c0_seq1	804.334	1576.14	32.5269	0.0206371	-5.59862	0.0403315	1	Down	9.13454	0.0979423	7771	gi|42558189|dbj|BAD11098.1|vitellogenin [Pandalus hypsinotus]	0	sp|Q6RG02|VIT_FENME	0	Vitellogenin OS=Fenneropenaeus merguiensis PE=1 SV=2	KOG4338	2e-41	Predicted lipoprotein							GO:0008289;GO:0005319;GO:0045735;GO:0048477	lipid binding|lipid transporter activity|nutrient reservoir activity|oogenesis
comp134051_c0_seq2	1281.28	9.89949	2552.66	257.857	8.01043	0.00649797	0.630952	Up	0.201595	25.9426	2268
comp134068_c0_seq3	372.999	745.998	0	0	#NAME?	0.00560659	0.582944	Down	22.3252	0	1505
comp134104_c0_seq9	1793.58	3.53553	3583.62	1013.6	9.98527	0.00169278	0.371634	Up	0.075242	38.1897	2163
comp134169_c0_seq2	1725.34	0	3450.68	Inf	Inf	0.000257443	0.33299	Up	0	43.5228	1828
comp134180_c0_seq1	487.904	961.665	14.1421	0.0147059	-6.08746	0.0364242	1	Down	14.1664	0.108599	3057	gi|662213540|ref|XP_008480563.1|PREDICTED: RNA-directed DNA polymerase from mobile element jockey-like [Diaphorina citri]	0	sp|P08548|LIN1_NYCCO	1e-27	LINE-1 reverse transcriptase homolog OS=Nycticebus coucang PE=3 SV=1	KOG1075	9e-44	FOG: Reverse transcriptase							GO:0046872;GO:0003964	metal ion binding|RNA-directed DNA polymerase activity
comp134183_c0_seq2	3684.03	59.397	7308.66	123.048	6.94307	0.0177467	1	Up	1.07255	67.5834	2493
comp134194_c0_seq1	282.843	1.41421	564.271	399	8.64024	0.0145178	0.967052	Up	0.0804712	13.7889	944
comp134200_c0_seq4	1376.03	4.24264	2747.82	647.667	9.33911	0.00261926	0.412787	Up	0.0718592	23.5516	2689	gi|646708550|gb|KDR14815.1|BNIP2 motif-containing molecule at the C-terminal region 1 [Zootermopsis nevadensis]	3e-59	sp|Q0IHU9|PRUN2_XENTR	7e-57	Protein prune homolog 2 OS=Xenopus tropicalis GN=Prune2 PE=2 SV=1										GO:0005737;GO:0006915	cytoplasm|apoptotic process
comp134202_c1_seq1	92.631	0	185.262	Inf	Inf	0.039608	1	Up	0	5.01817	852
comp134215_c0_seq23	1676.9	3349.56	4.24264	0.00126662	-9.6248	0.0024486	0.406158	Down	24.6993	0.0169036	6107	gi|675389706|gb|KFM82603.1|hypothetical protein X975_11956, partial [Stegodyphus mimosarum]	8e-91				KOG4735	2e-70	Extracellular protein with conserved cysteines
comp134219_c0_seq1	7949.29	18.3848	15880.2	863.769	9.7545	0.00718648	0.664762	Up	0.199929	87.4358	4187	gi|762125082|ref|XP_011445555.1|PREDICTED: cholesterol desaturase daf-36-like [Crassostrea gigas]	3e-110	sp|Q17938|DAF36_CAEEL	8e-95	Cholesterol desaturase daf-36 OS=Caenorhabditis elegans GN=daf-36 PE=1 SV=2				ko00981;ko04212	Insect hormone biosynthesis|Longevity regulating pathway - worm	2	K14938	NVD, DAF36	cholesterol 7-desaturase	GO:0005737;GO:0016021;GO:0051537;GO:0046872;GO:0016491;GO:0008203	cytoplasm|integral component of membrane|2 iron, 2 sulfur cluster binding|metal ion binding|oxidoreductase activity|cholesterol metabolic process
comp134254_c0_seq2	349.664	7.77817	691.55	88.9091	6.47426	0.0348648	1	Up	0.11792	5.26232	3029
comp134281_c3_seq1	1954.44	7.07107	3901.82	551.8	9.108	0.0030235	0.440757	Up	0.629925	185.45	485
comp134303_c1_seq7	1576.14	57.9828	3094.3	53.3659	5.73785	0.0330599	1	Up	0.573606	15.6271	4564	gi|1004403434|gb|EFA10859.2|hypothetical protein TcasGA2_TC001636 [Tribolium castaneum]	3e-70	sp|Q6ZSS7|MFSD6_HUMAN	3e-14	Major facilitator superfamily domain-containing protein 6 OS=Homo sapiens GN=MFSD6 PE=1 SV=2	KOG3762	7e-28	Predicted transporter							GO:0016021;GO:0016020;GO:0055085	integral component of membrane|membrane|transmembrane transport
comp134374_c0_seq4	2726.96	3.53553	5450.38	1541.6	10.5902	0.00128004	0.34072	Up	0.140065	117.112	1073
comp134378_c0_seq4	323.148	0	646.296	Inf	Inf	0.00400016	0.504234	Up	0	5.32028	2802
comp134379_c0_seq1	1983.43	24.0416	3942.83	164	7.35755	0.010414	0.808316	Up	0.378432	31.6959	2868
comp134381_c0_seq1	1218.7	4.94975	2432.45	491.429	8.94084	0.00348896	0.472281	Up	0.0647775	16.0786	3487
comp134390_c0_seq3	463.862	0	927.724	Inf	Inf	0.00185057	0.378845	Up	0	20.1627	1060
comp134403_c0_seq1	506.996	2.82843	1011.16	357.5	8.4818	0.00780989	0.690265	Up	0.0508515	8.737	2668
comp134408_c0_seq3	454.67	0	909.339	Inf	Inf	0.00192792	0.378845	Up	0	15.9077	1318
comp134416_c0_seq1	1923.33	14.1421	3832.52	271	8.08215	0.00616381	0.611573	Up	0.297558	41.2427	2142
comp134468_c3_seq1	373.352	8.48528	738.219	87	6.44294	0.0336773	1	Up	0.36151	16.5941	1025	gi|943979427|ref|XP_014370581.1|PREDICTED: malectin-B [Papilio machaon]	1e-64	sp|Q6INX3|MLECA_XENLA	8e-55	Malectin-A OS=Xenopus laevis GN=mlec-a PE=1 SV=1	KOG3593	7e-55	Predicted receptor-like serine/threonine kinase							GO:0005783;GO:0005789;GO:0016021;GO:0016020;GO:0030246;GO:0006487	endoplasmic reticulum|endoplasmic reticulum membrane|integral component of membrane|membrane|carbohydrate binding|protein N-linked glycosylation
comp134469_c0_seq3	2290.67	3.53553	4577.81	1294.8	10.3385	0.00140169	0.345759	Up	0.0994032	72.2258	1461
comp134472_c0_seq2	205.061	1.41421	408.708	289	8.17493	0.0268102	1	Up	0.0735237	8.72589	1080
comp134493_c0_seq8	573.11	1123.59	22.6274	0.0201385	-5.6339	0.044578	1	Down	13.0903	0.13089	3865
comp134510_c0_seq2	608.819	0	1217.64	Inf	Inf	0.00109492	0.34016	Up	0	8.07779	3473
comp134511_c0_seq4	1030.96	0	2061.92	Inf	Inf	0.000468512	0.33299	Up	0	8.52051	5580	gi|985412912|ref|XP_015371979.1|PREDICTED: pancreatic triacylglycerol lipase-like isoform X2 [Diuraphis noxia]	2e-92	sp|Q64425|LIPP_MYOCO	4e-79	Pancreatic triacylglycerol lipase (Fragment) OS=Myocastor coypus GN=PNLIP PE=2 SV=1				ko00561;ko04972;ko04975;ko04977	Glycerolipid metabolism|Pancreatic secretion|Fat digestion and absorption|Vitamin digestion and absorption	4	K14073	PNLIP, PL	pancreatic triacylglycerol lipase	GO:0005576;GO:0046872;GO:0004806;GO:0016042	extracellular region|metal ion binding|triglyceride lipase activity|lipid catabolic process
comp134531_c1_seq1	828.022	33.9411	1622.1	47.7917	5.57869	0.0398879	1	Up	3.02885	74.5008	502
comp134534_c0_seq10	980.05	33.9411	1926.16	56.75	5.82655	0.0322447	1	Up	0.473023	13.6454	3255
comp134542_c0_seq1	6406.39	57.9828	12754.8	219.976	7.7812	0.0166765	1	Up	2.09496	235.233	1250
comp134553_c0_seq1	3954.49	7900.5	8.48528	0.00107402	-9.86277	0.0028143	0.42497	Down	99.3882	0.0566422	3580	gi|972175992|ref|XP_015189967.1|PREDICTED: calcium-activated potassium channel slowpoke isoform X28 [Polistes dominula]	3e-06							ko04022;ko04270;ko04970;ko04972;ko04911;ko04924	cGMP - PKG signaling pathway|Vascular smooth muscle contraction|Salivary secretion|Pancreatic secretion|Insulin secretion|Renin secretion	6	K04936	KCNMA1	potassium large conductance calcium-activated channel subfamily M alpha member 1
comp134598_c0_seq1	3061.77	2.82843	6120.72	2164	11.0795	0.00101912	0.33299	Up	0.0331023	36.8313	3831	gi|768421783|ref|XP_011551716.1|PREDICTED: RNA exonuclease 1 homolog [Plutella xylostella]	4e-37	sp|Q7TT28|REXO1_MOUSE	3e-32	RNA exonuclease 1 homolog OS=Mus musculus GN=Rexo1 PE=1 SV=1	KOG2248	5e-32	3'-5' exonuclease	ko03008	Ribosome biogenesis in eukaryotes	1	K14570	REX1, REXO1, RNH70	RNA exonuclease 1	GO:0005654;GO:0004527;GO:0003676	nucleoplasm|exonuclease activity|nucleic acid binding
comp134614_c0_seq3	288.853	3.53553	574.171	162.4	7.34341	0.0259211	1	Up	0.317127	26.1571	506
comp134629_c0_seq2	568.867	12.0208	1125.71	93.6471	6.54916	0.0236924	1	Up	0.156245	7.5012	3460	gi|1008452919|ref|XP_015839212.1|PREDICTED: uncharacterized protein LOC664114 isoform X3 [Tribolium castaneum]	7e-12
comp134690_c0_seq3	421.082	12.0208	830.143	69.0588	6.10975	0.0378021	1	Up	0.153103	5.55237	3449	gi|999967730|gb|KXJ06904.1|Transposon TX1 uncharacterized 149 kDa protein [Exaiptasia pallida]	2e-26	sp|P14381|YTX2_XENLA	4e-22	Transposon TX1 uncharacterized 149 kDa protein OS=Xenopus laevis PE=3 SV=1	KOG1075	1e-18	FOG: Reverse transcriptase
comp134694_c0_seq5	700.743	9.89949	1391.59	140.571	7.13516	0.0144339	0.966023	Up	0.313154	22.6094	1419
comp134726_c0_seq5	1050.05	7.07107	2093.04	296	8.20945	0.00593212	0.604969	Up	0.0770807	11.7934	4092
comp134729_c0_seq1	659.731	1305.32	14.1421	0.0108342	-6.52826	0.0233193	1	Down	9.37896	0.0520965	6269	gi|926606889|ref|XP_013782532.1|PREDICTED: nephrin-like [Limulus polyphemus]	3e-139	sp|O60500|NPHN_HUMAN	2e-76	Nephrin OS=Homo sapiens GN=NPHS1 PE=1 SV=1	KOG3515	7e-122	Predicted transmembrane protein of the immunoglobulin family of cell adhesion molecules							GO:0042995;GO:0070062;GO:0005887;GO:0005622;GO:0005886;GO:0036057;GO:0017022;GO:0007155;GO:0007588;GO:0032836;GO:0072015;GO:0007254;GO:0007520;GO:0030838;GO:0035418;GO:0044062;GO:0007519	cell projection|extracellular exosome|integral component of plasma membrane|intracellular|plasma membrane|slit diaphragm|myosin binding|cell adhesion|excretion|glomerular basement membrane development|glomerular visceral epithelial cell development|JNK cascade|myoblast fusion|positive regulation of actin filament polymerization|protein localization to synapse|regulation of excretion|skeletal musc…
comp134765_c1_seq3	4931.01	26.163	9835.86	375.946	8.55438	0.00763903	0.688548	Up	0.841593	163.942	1383
comp134786_c0_seq4	325.976	7.07107	644.881	91.2	6.51096	0.0362281	1	Up	0.127409	6.16829	2409	gi|999967495|gb|KXJ06669.1|Retrovirus-related Pol polyprotein from transposon 17.6 [Exaiptasia pallida]	0	sp|P20825|POL2_DROME	5e-93	Retrovirus-related Pol polyprotein from transposon 297 OS=Drosophila melanogaster GN=pol PE=3 SV=1	KOG0017	4e-91	FOG: Transposon-encoded proteins with TYA, reverse transcriptase, integrase domains in various combinations							GO:0004190;GO:0004519;GO:0003676;GO:0003964;GO:0015074	aspartic-type endopeptidase activity|endonuclease activity|nucleic acid binding|RNA-directed DNA polymerase activity|DNA integration
comp134807_c0_seq4	509.47	12.0208	1006.92	83.7647	6.38827	0.0280377	1	Up	0.15854	6.83634	3397
comp134814_c1_seq1	2014.19	4026.97	1.41421	0.000351185	-11.4755	0.000992771	0.33299	Down	52.9536	0.0107567	3425	gi|780055989|ref|XP_011669768.1|PREDICTED: uncharacterized protein LOC105440883 [Strongylocentrotus purpuratus]	2e-65
comp134819_c0_seq5	555.079	0	1110.16	Inf	Inf	0.00129898	0.34072	Up	0	14.7291	1737
comp134828_c0_seq1	688.015	4.24264	1371.79	323.333	8.33688	0.0066868	0.642441	Up	0.0771069	12.2414	2583
comp134851_c0_seq5	2165.87	5.65685	4326.08	764.75	9.57884	0.00224773	0.399969	Up	0.0423369	16.8421	5922	gi|762128131|ref|XP_011447160.1|PREDICTED: uncharacterized protein LOC105342062 isoform X3 [Crassostrea gigas]	6e-28	sp|Q58EK5|TDRD1_DANRE	1e-17	Tudor domain-containing protein 1 OS=Danio rerio GN=tdrd1 PE=1 SV=2	KOG2039	5e-17	Transcriptional coactivator p100							GO:0005737;GO:0043186;GO:0071546;GO:0046872;GO:0043046;GO:0031047;GO:0007281;GO:0051321;GO:0007275;GO:0034587;GO:0007283	cytoplasm|P granule|pi-body|metal ion binding|DNA methylation involved in gamete generation|gene silencing by RNA|germ cell development|meiotic cell cycle|multicellular organismal development|piRNA metabolic process|spermatogenesis
comp134867_c0_seq4	1369.31	58.6899	2679.93	45.6627	5.51294	0.0389301	1	Up	0.723885	16.957	3643
comp134897_c1_seq1	496.743	9.19239	984.293	107.077	6.7425	0.0226898	1	Up	0.128369	7.28416	3117	gi|597835046|gb|EYB84716.1|hypothetical protein Y032_0311g2141 [Ancylostoma ceylanicum]	3e-81				KOG0017	9e-58	FOG: Transposon-encoded proteins with TYA, reverse transcriptase, integrase domains in various combinations
comp134907_c2_seq1	14003.2	27996.5	9.89949	0.000353598	-11.4656	0.0095155	0.767701	Down	613.24	0.118272	2056	gi|999987772|gb|KXJ26881.1|CBL-interacting protein kinase 22 [Exaiptasia pallida]	2e-08				KOG1164	5e-06	Casein kinase (serine/threonine/tyrosine protein kinase)
comp134914_c0_seq3	415.779	1.41421	830.143	587	9.19722	0.00679212	0.648451	Up	0.0109652	4.14835	4613
comp134928_c0_seq3	2374.11	48.7904	4699.43	96.3188	6.58975	0.0188641	1	Up	0.381884	18.7874	5766	gi|999967495|gb|KXJ06669.1|Retrovirus-related Pol polyprotein from transposon 17.6 [Exaiptasia pallida]	0	sp|Q99315|YG31B_YEAST	8e-77	Transposon Ty3-G Gag-Pol polyprotein OS=Saccharomyces cerevisiae (strain ATCC 204508 / S288c) GN=TY3B-G PE=1 SV=3	KOG0017	3e-79	FOG: Transposon-encoded proteins with TYA, reverse transcriptase, integrase domains in various combinations							GO:0005737;GO:0005634;GO:0000943;GO:0004190;GO:0005524;GO:0003677;GO:0003887;GO:0008233;GO:0004540;GO:0003723;GO:0003964;GO:0004523;GO:0008270;GO:0071897;GO:0015074;GO:0006310;GO:0090501;GO:0006278;GO:0032197;GO:0019076	cytoplasm|nucleus|retrotransposon nucleocapsid|aspartic-type endopeptidase activity|ATP binding|DNA binding|DNA-directed DNA polymerase activity|peptidase activity|ribonuclease activity|RNA binding|RNA-directed DNA polymerase activity|RNA-DNA hybrid ribonuclease activity|zinc ion binding|DNA biosynthetic process|DNA integration|DNA recombination|RNA phosphodiester bond hydrolysis|RNA-dependent DN…
comp134932_c0_seq2	1018.94	1.41421	2036.47	1440	10.4919	0.0015286	0.359858	Up	0.0198714	19.2815	2435
comp134940_c1_seq2	8639.78	17122.6	156.978	0.00916787	-6.7692	0.0429159	1	Down	98.9883	0.462933	7790	gi|1004172906|gb|KXZ75731.1|hypothetical protein TcasGA2_TC031670 [Tribolium castaneum]	3e-163	sp|P04323|POL3_DROME	4e-118	Retrovirus-related Pol polyprotein from transposon 17.6 OS=Drosophila melanogaster GN=pol PE=3 SV=1										GO:0004190;GO:0004519;GO:0003676;GO:0003964;GO:0015074	aspartic-type endopeptidase activity|endonuclease activity|nucleic acid binding|RNA-directed DNA polymerase activity|DNA integration
comp134946_c0_seq1	369.817	9.89949	729.734	73.7143	6.20387	0.0391461	1	Up	0.232018	8.99902	1868
comp134953_c1_seq1	3360.88	11.3137	6710.44	593.125	9.21219	0.00353526	0.475154	Up	0.144191	43.8866	3525
comp134963_c0_seq4	305.824	7.77817	603.869	77.6364	6.27866	0.0436457	1	Up	0.20585	8.50326	1639
comp134976_c0_seq2	280.014	0	560.029	Inf	Inf	0.00547808	0.575153	Up	0	24.3953	529
comp135004_c0_seq2	1374.26	54.4472	2694.08	49.4805	5.62879	0.0358001	1	Up	0.897102	22.6085	2747
comp135041_c0_seq3	1163.54	33.234	2293.85	69.0213	6.10897	0.0256301	1	Up	0.403927	14.2349	3715
comp135044_c1_seq1	5550.79	45.2548	11056.3	244.312	7.93258	0.0129022	0.9098	Up	0.883982	110.426	2308
comp135086_c0_seq6	249.962	4.94975	494.975	100	6.64386	0.0429512	1	Up	0.333587	17.3287	658
comp135110_c0_seq2	379.363	10.6066	748.119	70.5333	6.14023	0.039916	1	Up	0.224835	7.96978	2164
comp135114_c0_seq2	803.273	36.7696	1569.78	42.6923	5.4159	0.0450469	1	Up	0.560113	12.264	2951
comp135140_c0_seq2	864.438	6.36396	1722.51	270.667	8.08037	0.0069606	0.657088	Up	0.099502	14.0866	2820
comp135153_c0_seq1	4701.55	86.267	9316.84	108	6.75489	0.0237365	1	Up	0.669686	36.9676	5810	gi|919091294|ref|XP_013382645.1|PREDICTED: uncharacterized protein LOC106153310 [Lingula anatina]	0	sp|P20825|POL2_DROME	4e-85	Retrovirus-related Pol polyprotein from transposon 297 OS=Drosophila melanogaster GN=pol PE=3 SV=1	KOG0017	7e-91	FOG: Transposon-encoded proteins with TYA, reverse transcriptase, integrase domains in various combinations							GO:0004190;GO:0004519;GO:0003676;GO:0003964;GO:0015074	aspartic-type endopeptidase activity|endonuclease activity|nucleic acid binding|RNA-directed DNA polymerase activity|DNA integration
comp135156_c0_seq1	292.742	581.242	4.24264	0.00729927	-7.09803	0.0324347	1	Down	59.4915	0.194115	440
comp135180_c0_seq1	1726.75	0	3453.51	Inf	Inf	0.000257254	0.33299	Up	0	35.4728	2244
comp135201_c0_seq1	323.855	5.65685	642.053	113.5	6.82655	0.0304943	1	Up	0.0750145	4.15695	3563	gi|999984436|gb|KXJ23577.1|Uncharacterized protein K02A2.6 [Exaiptasia pallida]	7e-74				KOG0017	6e-56	FOG: Transposon-encoded proteins with TYA, reverse transcriptase, integrase domains in various combinations
comp135230_c0_seq5	1561.29	1.41421	3121.17	2207	11.1079	0.000915111	0.33299	Up	0.0181837	24.1579	2979
comp135239_c0_seq3	188.798	377.595	0	0	#NAME?	0.0216065	1	Down	5.84984	0	2905	gi|123472754|ref|XP_001319569.1|viral A-type inclusion protein [Trichomonas vaginalis G3]	6e-46
comp135240_c0_seq2	207.182	0	414.365	Inf	Inf	0.0104184	0.808316	Up	0	20.0714	476
comp135248_c0_seq4	427.446	6.36396	848.528	133.333	7.05889	0.020856	1	Up	0.199055	13.0235	1503
comp135275_c0_seq1	194.808	388.202	1.41421	0.00364299	-8.10066	0.0364308	1	Down	7.89929	0.0158555	2215	gi|999965910|gb|KXJ05088.1|hypothetical protein AC249_AIPGENE14849, partial [Exaiptasia pallida]	5e-81
comp135301_c0_seq1	6374.57	2.82843	12746.3	4506.5	12.1378	0.00133537	0.342918	Up	0.0273306	58.2287	5046
comp135327_c1_seq1	1426.94	2849.64	4.24264	0.00148883	-9.3916	0.00289342	0.431364	Down	34.7477	0.0274742	3693	gi|1000212883|gb|KXJ82396.1|hypothetical protein RP20_CCG013880 [Aedes albopictus]	9e-08
comp135329_c0_seq7	3509.37	22.6274	6996.11	309.188	8.27234	0.00689525	0.653785	Up	0.306547	48.1614	3349
comp135335_c0_seq1	333.047	664.68	1.41421	0.00212766	-8.87652	0.0135449	0.931045	Down	8.39116	0.00761198	3569	gi|1005490049|ref|XP_015747739.1|PREDICTED: uncharacterized protein K02A2.6-like [Acropora digitifera]	0	sp|P0CT39|TF26_SCHPO	4e-39	Transposon Tf2-6 polyprotein OS=Schizosaccharomyces pombe (strain 972 / ATCC 24843) GN=Tf2-6 PE=3 SV=1	KOG0017	6e-70	FOG: Transposon-encoded proteins with TYA, reverse transcriptase, integrase domains in various combinations							GO:0004190;GO:0003677;GO:0003887;GO:0004519;GO:0046872;GO:0003723;GO:0003964;GO:0015074;GO:0006310	aspartic-type endopeptidase activity|DNA binding|DNA-directed DNA polymerase activity|endonuclease activity|metal ion binding|RNA binding|RNA-directed DNA polymerase activity|DNA integration|DNA recombination
comp135336_c0_seq3	470.226	2.82843	937.624	331.5	8.37287	0.00892659	0.74349	Up	0.0717211	12.3896	1745
comp135342_c0_seq4	580.888	2.12132	1159.66	546.667	9.09452	0.00492016	0.547995	Up	0.0275221	8.669	3082
comp135352_c0_seq5	745.291	1490.58	0	0	#NAME?	0.0015915	0.365346	Down	17.1373	0	3917	gi|761909128|ref|XP_011404012.1|PREDICTED: vigilin [Amphimedon queenslandica]	2e-11				KOG2208	7e-09	Vigilin
comp135357_c0_seq6	499.571	10.6066	988.535	93.2	6.54226	0.0256955	1	Up	0.216129	10.4106	2188	gi|585705586|ref|XP_006823664.1|PREDICTED: uncharacterized protein LOC100372741 [Saccoglossus kowalevskii]	2e-14
comp135368_c0_seq1	1360.83	2684.88	36.7696	0.013695	-6.1902	0.0241688	1	Down	65.3933	0.466286	1849	gi|954273956|gb|KRX66138.1|KRAB-A domain-containing protein 2 [Trichinella sp. T6]	5e-141	sp|Q6ZNG9|KRBA2_HUMAN	3e-54	KRAB-A domain-containing protein 2 OS=Homo sapiens GN=KRBA2 PE=1 SV=1	KOG0017	1e-54	FOG: Transposon-encoded proteins with TYA, reverse transcriptase, integrase domains in various combinations							GO:0005634;GO:0003677;GO:0015074;GO:0006355;GO:0032197	nucleus|DNA binding|DNA integration|regulation of transcription, DNA-templated|transposition, RNA-mediated
comp135389_c0_seq3	386.434	760.14	12.7279	0.0167442	-5.9002	0.0476814	1	Down	10.8174	0.0910455	3165	gi|999983160|gb|KXJ22303.1|Transforming growth factor beta-2 [Exaiptasia pallida]	2e-46
comp135393_c0_seq1	1259.36	19.799	2498.92	126.214	6.97973	0.0135509	0.931045	Up	0.190091	12.4152	4641
comp135399_c0_seq1	5681.25	126.572	11235.9	88.7709	6.47202	0.0331891	1	Up	1.37913	62.7905	4125
comp135415_c0_seq1	680.59	12.0208	1349.16	112.235	6.81038	0.0182126	1	Up	0.14401	8.36084	3720	gi|585644286|ref|XP_006813839.1|PREDICTED: uncharacterized protein LOC100372062 [Saccoglossus kowalevskii]	8e-161	sp|P10394|POL4_DROME	3e-44	Retrovirus-related Pol polyprotein from transposon 412 OS=Drosophila melanogaster GN=POL PE=3 SV=1	KOG0017	3e-34	FOG: Transposon-encoded proteins with TYA, reverse transcriptase, integrase domains in various combinations							GO:0004190;GO:0004519;GO:0003676;GO:0003964;GO:0015074	aspartic-type endopeptidase activity|endonuclease activity|nucleic acid binding|RNA-directed DNA polymerase activity|DNA integration
comp135433_c0_seq4	2533.56	89.0955	4978.03	55.873	5.80408	0.0337187	1	Up	0.880755	25.1016	4572	gi|957848991|ref|XP_014675019.1|PREDICTED: zinc finger protein 431-like [Priapulus caudatus]	7e-50
comp135439_c0_seq12	881.409	2.12132	1760.7	830	9.69697	0.00255076	0.410115	Up	0.0241523	10.975	3699
comp135470_c0_seq1	3130.72	37.4767	6223.95	166.075	7.3757	0.0120044	0.872997	Up	0.616459	52.1531	2751
comp135486_c0_seq1	1952.32	59.397	3845.25	64.7381	6.01654	0.0274643	1	Up	2.17823	72.183	1228
comp135498_c0_seq3	1991.21	0	3982.43	Inf	Inf	0.000229232	0.33299	Up	0	22.0502	4164
comp135499_c0_seq1	185.616	371.231	0	0	#NAME?	0.022288	1	Down	9.38162	0	1782	gi|123455572|ref|XP_001315529.1|DNA-directed RNA polymerase, omega subunit family protein [Trichomonas vaginalis G3]	2e-13
comp135502_c0_seq2	281.782	559.321	4.24264	0.00758534	-7.04257	0.0346671	1	Down	7.1643	0.0294308	3515	gi|999970508|gb|KXJ09682.1|Uncharacterized protein K02A2.6 [Exaiptasia pallida]	3e-142
comp135515_c0_seq4	1329.36	2588.01	70.7107	0.0273224	-5.19377	0.0493666	1	Down	18.5761	0.260486	6274	gi|926610915|ref|XP_013791212.1|PREDICTED: nuclear pore complex protein Nup93-like [Limulus polyphemus]	2e-12	sp|Q7ZU29|NUP93_DANRE	3e-10	Nuclear pore complex protein Nup93 OS=Danio rerio GN=dye PE=2 SV=1	KOG2168	7e-10	Cullins	ko03013	RNA transport	1	K14309	NUP93, NIC96	nuclear pore complex protein Nup93	GO:0031965;GO:0034399;GO:0005643;GO:0017056;GO:0051292;GO:0016973;GO:0006606	nuclear membrane|nuclear periphery|nuclear pore|structural constituent of nuclear pore|nuclear pore complex assembly|poly(A)+ mRNA export from nucleus|protein import into nucleus
comp135524_c0_seq1	5022.58	120.208	9924.95	82.5647	6.36745	0.0321264	1	Up	1.21187	51.1499	4473	gi|926625359|ref|XP_013778175.1|PREDICTED: cytochrome P450 3A24-like [Limulus polyphemus]	4e-70	sp|O42563|CP3AR_ONCMY	7e-39	Cytochrome P450 3A27 OS=Oncorhynchus mykiss GN=cyp3a27 PE=2 SV=1	KOG0158	1e-37	Cytochrome P450 CYP3/CYP5/CYP6/CYP9 subfamilies							GO:0005737;GO:0005789;GO:0016020;GO:0070330;GO:0020037;GO:0005506;GO:0050649;GO:0042448	cytoplasm|endoplasmic reticulum membrane|membrane|aromatase activity|heme binding|iron ion binding|testosterone 6-beta-hydroxylase activity|progesterone metabolic process
comp135553_c0_seq1	567.453	17.6777	1117.23	63.2	5.98185	0.0345718	1	Up	0.214589	6.93389	3714	gi|170584751|ref|XP_001897157.1|Pao retrotransposon peptidase family protein [Brugia malayi]	1e-15
comp135558_c0_seq3	369.817	8.48528	731.148	86.1667	6.42906	0.0342142	1	Up	0.11892	5.38672	3128	gi|585644286|ref|XP_006813839.1|PREDICTED: uncharacterized protein LOC100372062 [Saccoglossus kowalevskii]	3e-119	sp|P10394|POL4_DROME	4e-12	Retrovirus-related Pol polyprotein from transposon 412 OS=Drosophila melanogaster GN=POL PE=3 SV=1	KOG0017	3e-09	FOG: Transposon-encoded proteins with TYA, reverse transcriptase, integrase domains in various combinations							GO:0004190;GO:0004519;GO:0003676;GO:0003964;GO:0015074	aspartic-type endopeptidase activity|endonuclease activity|nucleic acid binding|RNA-directed DNA polymerase activity|DNA integration
comp135568_c0_seq4	658.316	11.3137	1305.32	115.375	6.85019	0.0180074	1	Up	0.0684527	4.14877	7252	gi|597873662|gb|EYC23036.1|hypothetical protein Y032_0016g3087 [Ancylostoma ceylanicum]	4e-54				KOG0017	1e-35	FOG: Transposon-encoded proteins with TYA, reverse transcriptase, integrase domains in various combinations
comp135575_c0_seq1	3520.33	125.158	6915.5	55.2542	5.78801	0.0383737	1	Up	0.683888	19.3507	8239	gi|999967495|gb|KXJ06669.1|Retrovirus-related Pol polyprotein from transposon 17.6 [Exaiptasia pallida]	3e-177	sp|P04323|POL3_DROME	1e-83	Retrovirus-related Pol polyprotein from transposon 17.6 OS=Drosophila melanogaster GN=pol PE=3 SV=1	KOG0017	4e-91	FOG: Transposon-encoded proteins with TYA, reverse transcriptase, integrase domains in various combinations							GO:0004190;GO:0004519;GO:0003676;GO:0003964;GO:0015074	aspartic-type endopeptidase activity|endonuclease activity|nucleic acid binding|RNA-directed DNA polymerase activity|DNA integration
comp135585_c0_seq2	195.869	1.41421	390.323	276	8.10852	0.0291498	1	Up	0.0812065	12.2076	738
comp135589_c0_seq2	9621.6	19237.5	5.65685	0.000294053	-11.7316	0.00404186	0.505249	Down	148.988	0.0222683	5815	gi|557785275|ref|XP_005192238.1|PREDICTED: fibrillin-1 [Musca domestica]	3e-38	sp|Q8N2E2|VWDE_HUMAN	7e-13	von Willebrand factor D and EGF domain-containing protein OS=Homo sapiens GN=VWDE PE=2 SV=4	KOG1217	6e-14	Fibrillins and related proteins containing Ca2+-binding EGF-like domains	ko04510;ko04151;ko04512;ko04610;ko04611	Focal adhesion|PI3K-Akt signaling pathway|ECM-receptor interaction|Complement and coagulation cascades|Platelet activation	5	K03900	VWF	von Willebrand factor	GO:0005576	extracellular region
comp135633_c0_seq1	961.312	1878.78	43.8406	0.0233346	-5.42139	0.0437032	1	Down	20.2446	0.241904	4180	gi|999967634|gb|KXJ06808.1|Retrovirus-related Pol polyprotein from transposon TNT 1-94 [Exaiptasia pallida]	1e-111	sp|P04146|COPIA_DROME	3e-102	Copia protein OS=Drosophila melanogaster GN=GIP PE=1 SV=3	KOG0017	2e-118	FOG: Transposon-encoded proteins with TYA, reverse transcriptase, integrase domains in various combinations							GO:0004190;GO:0005524;GO:0003676;GO:0008270;GO:0015074	aspartic-type endopeptidase activity|ATP binding|nucleic acid binding|zinc ion binding|DNA integration
comp135652_c1_seq6	501.692	13.435	989.949	73.6842	6.20328	0.0318995	1	Up	1.51105	57.2986	398
comp135695_c1_seq1	1234.25	2444.47	24.0416	0.00983512	-6.66784	0.0174051	1	Down	19.2721	0.0963576	5712	gi|861615348|gb|KMQ86082.1|gag-pol polyprotein [Lasius niger]	3e-166	sp|P10978|POLX_TOBAC	3e-83	Retrovirus-related Pol polyprotein from transposon TNT 1-94 OS=Nicotiana tabacum PE=2 SV=1	KOG0017	1e-169	FOG: Transposon-encoded proteins with TYA, reverse transcriptase, integrase domains in various combinations							GO:0004190;GO:0004519;GO:0003676;GO:0003964;GO:0008270;GO:0015074	aspartic-type endopeptidase activity|endonuclease activity|nucleic acid binding|RNA-directed DNA polymerase activity|zinc ion binding|DNA integration
comp135698_c0_seq14	361.685	719.128	4.24264	0.00589971	-7.40514	0.0223292	1	Down	7.89756	0.0225208	4100	gi|156359590|ref|XP_001624850.1|predicted protein [Nematostella vectensis]	2e-06
comp135706_c0_seq2	13317.6	33.9411	26601.4	783.75	9.61425	0.0188052	1	Up	0.616647	246.575	2487
comp135709_c1_seq3	1515.68	3015.81	15.5563	0.00515826	-7.5989	0.00891464	0.743416	Down	53.551	0.143802	2536	gi|597898157|gb|EYC46181.1|hypothetical protein Y032_0405g871 [Ancylostoma ceylanicum]	1e-103	sp|P11369|LORF2_MOUSE	2e-17	LINE-1 retrotransposable element ORF2 protein OS=Mus musculus GN=Pol PE=1 SV=2	KOG1075	5e-23	FOG: Reverse transcriptase							GO:0004519;GO:0046872;GO:0003964;GO:0006310	endonuclease activity|metal ion binding|RNA-directed DNA polymerase activity|DNA recombination
comp135718_c0_seq1	2398.86	4772.26	25.4558	0.00533412	-7.55053	0.00968855	0.771461	Down	46.2098	0.126547	4651	gi|91095311|ref|XP_973868.1|PREDICTED: probable RNA-directed DNA polymerase from transposon X-element [Tribolium castaneum]	7e-69	sp|Q95SX7|RTBS_DROME	1e-41	Probable RNA-directed DNA polymerase from transposon BS OS=Drosophila melanogaster GN=RTase PE=2 SV=1	KOG1075	8e-30	FOG: Reverse transcriptase							GO:0003964;GO:0006278;GO:0006313	RNA-directed DNA polymerase activity|RNA-dependent DNA replication|transposition, DNA-mediated
comp135739_c0_seq1	552.25	1091.77	12.7279	0.011658	-6.42253	0.0274187	1	Down	8.9138	0.0544496	5516	gi|987921629|ref|XP_015436995.1|PREDICTED: RNA-directed DNA polymerase from mobile element jockey-like [Dufourea novaeangliae]	9e-70	sp|P21329|RTJK_DROFU	1e-32	RNA-directed DNA polymerase from mobile element jockey OS=Drosophila funebris GN=jockey\pol PE=1 SV=1	KOG1075	2e-25	FOG: Reverse transcriptase							GO:0003964	RNA-directed DNA polymerase activity
comp135746_c2_seq1	1311.68	19.799	2603.57	131.5	7.03892	0.0129315	0.91026	Up	0.531221	35.6352	1684
comp135760_c1_seq1	758.372	37.4767	1479.27	39.4717	5.30275	0.049479	1	Up	0.347467	7.06747	4823	gi|999967495|gb|KXJ06669.1|Retrovirus-related Pol polyprotein from transposon 17.6 [Exaiptasia pallida]	0	sp|P04323|POL3_DROME	8e-86	Retrovirus-related Pol polyprotein from transposon 17.6 OS=Drosophila melanogaster GN=pol PE=3 SV=1	KOG0017	5e-80	FOG: Transposon-encoded proteins with TYA, reverse transcriptase, integrase domains in various combinations							GO:0004190;GO:0004519;GO:0003676;GO:0003964;GO:0015074	aspartic-type endopeptidase activity|endonuclease activity|nucleic acid binding|RNA-directed DNA polymerase activity|DNA integration
comp135769_c0_seq1	4995.36	108.187	9882.52	91.3464	6.51328	0.0291101	1	Up	1.38483	64.7063	3521
comp135770_c0_seq1	361.332	715.592	7.07107	0.00988142	-6.66107	0.0327896	1	Down	7.20216	0.0379039	4476	gi|909821380|gb|AKU04652.1|polyprotein [Blattella germanica]	5e-47	sp|P14381|YTX2_XENLA	4e-43	Transposon TX1 uncharacterized 149 kDa protein OS=Xenopus laevis PE=3 SV=1	KOG1075	4e-14	FOG: Reverse transcriptase	ko03410	Base excision repair	1	K01142	E3.1.11.2, xthA	exodeoxyribonuclease III
comp135815_c0_seq1	1518.51	3037.02	0	0	#NAME?	0.000613992	0.33299	Down	240.381	0	569
comp135822_c0_seq1	1936.41	3872.82	0	0	#NAME?	0.000491182	0.33299	Down	140.545	0	1241	gi|954562168|ref|XP_014604912.1|PREDICTED: protein UBASH3A homolog isoform X2 [Polistes canadensis]	1e-24	sp|P57075|UBS3A_HUMAN	2e-24	Ubiquitin-associated and SH3 domain-containing protein A OS=Homo sapiens GN=UBASH3A PE=1 SV=1	KOG3734	4e-25	Predicted phosphoglycerate mutase							GO:0005829;GO:0070062;GO:0005634;GO:0050860;GO:0001817	cytosol|extracellular exosome|nucleus|negative regulation of T cell receptor signaling pathway|regulation of cytokine production
comp135828_c0_seq1	863.024	1703.42	22.6274	0.0132835	-6.23422	0.0255181	1	Down	63.6577	0.440509	1205
comp135831_c0_seq1	847.821	0	1695.64	Inf	Inf	0.000626507	0.33299	Up	0	115.31	339
comp135838_c0_seq1	162.988	325.976	0	0	#NAME?	0.0279471	1	Down	40.7885	0	360	gi|557187119|emb|CDJ46118.1|hypothetical protein EBH_0064320, partial [Eimeria brunetti]	1e-06
comp135845_c0_seq1	564.625	1129.25	0	0	#NAME?	0.0025363	0.410115	Down	59.8218	0	850
comp135854_c0_seq1	417.193	0	834.386	Inf	Inf	0.0023053	0.405276	Up	0	50.6576	380
comp135887_c0_seq1	112.784	225.567	0	0	#NAME?	0.0481019	1	Down	9.9163	0	1024	gi|805771930|ref|XP_012136795.1|PREDICTED: putative leucine-rich repeat-containing protein DDB_G0290503 [Megachile rotundata]	8e-14
comp135915_c0_seq1	120.915	0	241.831	Inf	Inf	0.0271101	1	Up	0	9.49326	588
comp135954_c0_seq1	154.856	0	309.713	Inf	Inf	0.0182428	1	Up	0	5.43859	1314
comp39065_c0_seq1	115.258	0	230.517	Inf	Inf	0.0291194	1	Up	0	15.7971	337
comp39087_c0_seq1	117.38	234.759	0	0	#NAME?	0.0455572	1	Down	31.057	0	340
comp39182_c0_seq1	177.837	355.675	0	0	#NAME?	0.0240673	1	Down	35.9768	0	445	gi|926617343|ref|XP_013773832.1|PREDICTED: EH domain-containing protein 3-like [Limulus polyphemus]	7e-32	sp|Q5RBP4|EHD1_PONAB	8e-33	EH domain-containing protein 1 OS=Pongo abelii GN=EHD1 PE=2 SV=1	KOG1954	1e-35	Endocytosis/signaling protein EHD1	ko04144	Endocytosis	1	K12483	EHD1	EH domain-containing protein 1	GO:0020018;GO:0031901;GO:0030139;GO:0010008;GO:0005811;GO:0043209;GO:0048471;GO:0005886;GO:0031095;GO:0055038;GO:0005524;GO:0005509;GO:0005525;GO:1990090;GO:0042632;GO:0042384;GO:0032456;GO:0006897;GO:0006886;GO:0034383;GO:0031175;GO:0010886;GO:2001137;GO:1901741;GO:0061512	ciliary pocket membrane|early endosome membrane|endocytic vesicle|endosome membrane|lipid particle|myelin sheath|perinuclear region of cytoplasm|plasma membrane|platelet dense tubular network membrane|recycling endosome membrane|ATP binding|calcium ion binding|GTP binding|cellular response to nerve growth factor stimulus|cholesterol homeostasis|cilium assembly|endocytic recycling|endocytosis|intr…
comp39204_c0_seq1	8741.61	17476.1	7.07107	0.000404613	-11.2712	0.00409187	0.505589	Down	1540.17	0.29471	511	gi|916509882|ref|XP_013355169.1|hypothetical protein, conserved [Eimeria mitis]	7e-06
comp39207_c0_seq1	3986.31	7972.63	0	0	#NAME?	0.000399856	0.33299	Down	551.513	0	651
comp39219_c0_seq1	12711.3	2.12132	25420.5	11983.3	13.5487	0.0031395	0.447616	Up	0.0823595	505.621	1159
comp39248_c0_seq1	2869.09	5712.72	25.4558	0.004456	-7.81004	0.00864926	0.733059	Down	430.952	0.980075	597
comp39252_c0_seq1	7783.83	15560.6	7.07107	0.000454422	-11.1037	0.00354656	0.475829	Down	383.135	0.0938382	1829
comp39254_c0_seq1	572.756	0	1145.51	Inf	Inf	0.00122462	0.34072	Up	0	46.4729	568
comp39256_c0_seq1	98.2878	0	196.576	Inf	Inf	0.0365704	1	Up	0	10.1709	447
comp39440_c0_seq1	297.692	592.555	2.82843	0.00477327	-7.71081	0.0242751	1	Down	26.2788	0.0724074	1016	gi|359372820|gb|AEV42254.1|ferritin [Palaemon carinicauda]	1e-70	sp|Q26061|FRI_PACLE	3e-75	Ferritin OS=Pacifastacus leniusculus PE=1 SV=1	KOG2332	2e-66	Ferritin	ko04978	Mineral absorption	1	K00522	FTH1	ferritin heavy chain	GO:0005737;GO:0008199;GO:0004322;GO:0006879;GO:0006826	cytoplasm|ferric iron binding|ferroxidase activity|cellular iron ion homeostasis|iron ion transport
comp39512_c0_seq1	86.267	0	172.534	Inf	Inf	0.0434098	1	Up	0	9.78085	406
comp39661_c0_seq1	163.342	0	326.683	Inf	Inf	0.0166041	1	Up	0	5.28109	1428
comp52534_c0_seq1	204.354	0	408.708	Inf	Inf	0.01072	0.822492	Up	0	20.3314	464
comp52984_c0_seq1	736.098	0	1472.2	Inf	Inf	0.000788082	0.33299	Up	0	98.6156	344
comp53390_c0_seq1	1665.94	25.4558	3306.43	129.889	7.02113	0.0130362	0.914151	Up	0.854257	57.4748	1326	gi|576700677|gb|EUB64198.1|Mothers against decapentaplegic [Echinococcus granulosus]	1e-12	sp|P42003|MAD_DROME	5e-11	Protein mothers against dpp OS=Drosophila melanogaster GN=Mad PE=1 SV=1	KOG3701	1e-11	TGFbeta receptor signaling protein SMAD and related proteins	ko04550;ko04350;ko04390;ko04391;ko05202	Signaling pathways regulating pluripotency of stem cells|TGF-beta signaling pathway|Hippo signaling pathway|Hippo signaling pathway -fly|Transcriptional misregulation in cancers	5	K04676	SMAD1	mothers against decapentaplegic homolog 1	GO:0005737;GO:0005634;GO:0005667;GO:0003677;GO:0046872;GO:0001102;GO:0000980;GO:0001105;GO:0043565;GO:0003705;GO:0030618;GO:0061353;GO:0001745;GO:0007391;GO:0042078;GO:0030718;GO:0007507;GO:0007488;GO:0007480;GO:0007476;GO:0008586;GO:0035556;GO:2000134;GO:0010629;GO:0045705;GO:0007424;GO:0030707;GO:0045887;GO:0045944;GO:0045595;GO:0050803;GO:0006357;GO:0035019;GO:0007179;GO:0060799;GO:0035290;GO:…	cytoplasm|nucleus|transcription factor complex|DNA binding|metal ion binding|RNA polymerase II activating transcription factor binding|RNA polymerase II distal enhancer sequence-specific DNA binding|RNA polymerase II transcription coactivator activity|sequence-specific DNA binding|transcription factor activity, RNA polymerase II distal enhancer sequence-specific binding|transforming growth factor…
comp53434_c0_seq1	5821.61	2.82843	11640.4	4115.5	12.0069	0.00122336	0.34072	Up	0.238448	516.043	520
comp53556_c0_seq1	1479.27	2955.71	2.82843	0.000956938	-10.0293	0.00204048	0.383236	Down	280.818	0.115425	474
comp53649_c0_seq1	6184	12362.3	5.65685	0.000457587	-11.0937	0.00241654	0.406158	Down	1652.05	0.368326	337
comp53654_c0_seq1	20112.9	40216	9.89949	0.000246158	-11.9881	0.0169491	1	Down	1136.21	0.136116	1594
comp53655_c0_seq1	365.574	0	731.148	Inf	Inf	0.00305594	0.443046	Up	0	37.4592	450
comp53663_c0_seq1	8667.71	17305.7	29.6985	0.00171611	-9.18664	0.011601	0.852821	Down	894.769	0.778238	871
comp53773_c0_seq1	691.55	0	1383.1	Inf	Inf	0.00087597	0.33299	Up	0	98.376	324
comp53788_c0_seq1	599.627	19.799	1179.45	59.5714	5.89655	0.0357051	1	Up	2.75617	82.8514	328	gi|1022753798|gb|KZS02224.1|Uncharacterized protein APZ42_000816, partial [Daphnia magna]	2e-06
comp53822_c0_seq1	3378.91	99.7021	6658.12	66.7801	6.06135	0.0312008	1	Up	10.4134	355.26	432
comp53900_c0_seq1	813.88	1627.76	0	0	#NAME?	0.00138567	0.345524	Down	128.397	0	571
[truncated: 150 more rows]
