# Supplementary material
Source: MDPI journal article supplement (https://www.mdpi.com/2077-1312/10/6/737)
Supplement: s1 [file s1 › Table S5.xlsx]

## Sheet: GO enrichment analysis
id	term	category	ListHits	ListTotal	PopHits	PopTotal	pval	padj	Enrichment_score	Gene
GO:0061474	phagolysosome membrane	cellular_component	1	287	1	12622	0	0	43.9791	comp104643_c0_seq1
GO:1902513	regulation of organelle transport along microtubule	biological_process	1	287	1	12622	0	0	43.9791	comp104643_c0_seq1
GO:0009860	pollen tube growth	biological_process	1	287	1	12622	0	0	43.9791	comp104919_c0_seq1
GO:0042425	choline biosynthetic process	biological_process	1	287	1	12622	0	0	43.9791	comp104919_c0_seq1
GO:0048528	post-embryonic root development	biological_process	1	287	1	12622	0	0	43.9791	comp104919_c0_seq1
GO:0030195	negative regulation of blood coagulation	biological_process	1	287	1	12622	0	0	43.9791	comp110378_c0_seq1
GO:0017105	acyl-CoA delta11-desaturase activity	molecular_function	1	287	1	12622	0	0	43.9791	comp112506_c0_seq1
GO:0009918	sterol delta7 reductase activity	molecular_function	1	287	1	12622	0	0	43.9791	comp112549_c0_seq1
GO:0016132	brassinosteroid biosynthetic process	biological_process	1	287	1	12622	0	0	43.9791	comp112549_c0_seq1
GO:0047598	7-dehydrocholesterol reductase activity	molecular_function	1	287	1	12622	0	0	43.9791	comp112549_c0_seq1
GO:0001823	mesonephros development	biological_process	1	287	1	12622	0	0	43.9791	comp112662_c0_seq1
GO:0002572	pro-T cell differentiation	biological_process	1	287	1	12622	0	0	43.9791	comp112662_c0_seq1
GO:0003180	aortic valve morphogenesis	biological_process	1	287	1	12622	0	0	43.9791	comp112662_c0_seq1
GO:0035799	ureter maturation	biological_process	1	287	1	12622	0	0	43.9791	comp112662_c0_seq1
GO:0035898	parathyroid hormone secretion	biological_process	1	287	1	12622	0	0	43.9791	comp112662_c0_seq1
GO:0042035	regulation of cytokine biosynthetic process	biological_process	1	287	1	12622	0	0	43.9791	comp112662_c0_seq1
GO:0045061	thymic T cell selection	biological_process	1	287	1	12622	0	0	43.9791	comp112662_c0_seq1
GO:0045064	T-helper 2 cell differentiation	biological_process	1	287	1	12622	0	0	43.9791	comp112662_c0_seq1
GO:0060065	uterus development	biological_process	1	287	1	12622	0	0	43.9791	comp112662_c0_seq1
GO:0060374	mast cell differentiation	biological_process	1	287	1	12622	0	0	43.9791	comp112662_c0_seq1
GO:0060676	ureteric bud formation	biological_process	1	287	1	12622	0	0	43.9791	comp112662_c0_seq1
GO:0061085	regulation of histone H3-K27 methylation	biological_process	1	287	1	12622	0	0	43.9791	comp112662_c0_seq1
GO:0072107	positive regulation of ureteric bud formation	biological_process	1	287	1	12622	0	0	43.9791	comp112662_c0_seq1
GO:0072178	nephric duct morphogenesis	biological_process	1	287	1	12622	0	0	43.9791	comp112662_c0_seq1
GO:0072179	nephric duct formation	biological_process	1	287	1	12622	0	0	43.9791	comp112662_c0_seq1
GO:0072182	regulation of nephron tubule epithelial cell differentiation	biological_process	1	287	1	12622	0	0	43.9791	comp112662_c0_seq1
GO:0072602	interleukin-4 secretion	biological_process	1	287	1	12622	0	0	43.9791	comp112662_c0_seq1
GO:0072643	interferon-gamma secretion	biological_process	1	287	1	12622	0	0	43.9791	comp112662_c0_seq1
GO:0072676	lymphocyte migration	biological_process	1	287	1	12622	0	0	43.9791	comp112662_c0_seq1
GO:2000146	negative regulation of cell motility	biological_process	1	287	1	12622	0	0	43.9791	comp112662_c0_seq1
GO:2000607	negative regulation of cell proliferation involved in mesonephros development	biological_process	1	287	1	12622	0	0	43.9791	comp112662_c0_seq1
GO:2000664	positive regulation of interleukin-5 secretion	biological_process	1	287	1	12622	0	0	43.9791	comp112662_c0_seq1
GO:2000667	positive regulation of interleukin-13 secretion	biological_process	1	287	1	12622	0	0	43.9791	comp112662_c0_seq1
GO:2000683	regulation of cellular response to X-ray	biological_process	1	287	1	12622	0	0	43.9791	comp112662_c0_seq1
GO:2000703	negative regulation of fibroblast growth factor receptor signaling pathway involved in ureteric bud formation	biological_process	1	287	1	12622	0	0	43.9791	comp112662_c0_seq1
GO:2000734	negative regulation of glial cell-derived neurotrophic factor receptor signaling pathway involved in ureteric bud formation	biological_process	1	287	1	12622	0	0	43.9791	comp112662_c0_seq1
GO:0071973	bacterial-type flagellum-dependent cell motility	biological_process	1	287	1	12622	0	0	43.9791	comp112859_c0_seq2
GO:0047224	acetylgalactosaminyl-O-glycosyl-glycoprotein beta-1,3-N-acetylglucosaminyltransferase activity	molecular_function	1	287	1	12622	0	0	43.9791	comp113154_c0_seq1
GO:0004772	sterol O-acyltransferase activity	molecular_function	1	287	1	12622	0	0	43.9791	comp114565_c0_seq1
GO:0010742	macrophage derived foam cell differentiation	biological_process	1	287	1	12622	0	0	43.9791	comp114565_c0_seq1
GO:0010878	cholesterol storage	biological_process	1	287	1	12622	0	0	43.9791	comp114565_c0_seq1
GO:0034435	cholesterol esterification	biological_process	1	287	1	12622	0	0	43.9791	comp114565_c0_seq1
GO:0034736	cholesterol O-acyltransferase activity	molecular_function	1	287	1	12622	0	0	43.9791	comp114565_c0_seq1
GO:0042986	positive regulation of amyloid precursor protein biosynthetic process	biological_process	1	287	1	12622	0	0	43.9791	comp114565_c0_seq1
GO:0019481	L-alanine catabolic process, by transamination	biological_process	1	287	1	12622	0	0	43.9791	comp116880_c0_seq1
GO:0097688	glutamate receptor clustering	biological_process	1	287	1	12622	0	0	43.9791	comp117829_c0_seq1
GO:0021797	forebrain anterior/posterior pattern specification	biological_process	1	287	1	12622	0	0	43.9791	comp119082_c0_seq1
GO:0035187	hatching behavior	biological_process	1	287	1	12622	0	0	43.9791	comp120390_c0_seq1
GO:0042595	behavioral response to starvation	biological_process	1	287	1	12622	0	0	43.9791	comp120722_c0_seq1
GO:0031273	negative regulation of pseudopodium assembly	biological_process	1	287	1	12622	0	0	43.9791	comp121557_c0_seq1
GO:0035036	sperm-egg recognition	biological_process	1	287	1	12622	0	0	43.9791	comp122176_c1_seq1
GO:0071872	cellular response to epinephrine stimulus	biological_process	1	287	1	12622	0	0	43.9791	comp123086_c0_seq1
GO:0071875	adrenergic receptor signaling pathway	biological_process	1	287	1	12622	0	0	43.9791	comp123086_c0_seq1
GO:1901844	regulation of cell communication by electrical coupling involved in cardiac conduction	biological_process	1	287	1	12622	0	0	43.9791	comp123086_c0_seq1
GO:1901898	negative regulation of relaxation of cardiac muscle	biological_process	1	287	1	12622	0	0	43.9791	comp123086_c0_seq1
GO:0032680	regulation of tumor necrosis factor production	biological_process	1	287	1	12622	0	0	43.9791	comp124139_c0_seq1
GO:0010520	regulation of reciprocal meiotic recombination	biological_process	1	287	1	12622	0	0	43.9791	comp125174_c0_seq1
GO:0030999	linear element assembly	biological_process	1	287	1	12622	0	0	43.9791	comp125174_c0_seq1
GO:0004850	uridine phosphorylase activity	molecular_function	1	287	1	12622	0	0	43.9791	comp125653_c0_seq7
GO:0060537	muscle tissue development	biological_process	2	287	2	12622	0	0	43.9791	comp126784_c0_seq4; comp98075_c0_seq1
GO:0005231	excitatory extracellular ligand-gated ion channel activity	molecular_function	1	287	1	12622	0	0	43.9791	comp127154_c0_seq2
GO:0016917	GABA receptor activity	molecular_function	1	287	1	12622	0	0	43.9791	comp127154_c0_seq2
GO:0045933	positive regulation of muscle contraction	biological_process	1	287	1	12622	0	0	43.9791	comp127154_c0_seq2
GO:0003876	AMP deaminase activity	molecular_function	1	287	1	12622	0	0	43.9791	comp127276_c0_seq1
GO:0006188	IMP biosynthetic process	biological_process	1	287	1	12622	0	0	43.9791	comp127276_c0_seq1
GO:0052652	cyclic purine nucleotide metabolic process	biological_process	1	287	1	12622	0	0	43.9791	comp127276_c0_seq1
GO:0042589	zymogen granule membrane	cellular_component	1	287	1	12622	0	0	43.9791	comp127397_c0_seq1
GO:0021919	BMP signaling pathway involved in spinal cord dorsal/ventral patterning	biological_process	1	287	1	12622	0	0	43.9791	comp129772_c1_seq1
GO:0007343	egg activation	biological_process	1	287	1	12622	0	0	43.9791	comp131416_c0_seq1
GO:0044179	hemolysis in other organism	biological_process	1	287	1	12622	0	0	43.9791	comp54538_c0_seq1
GO:0002437	inflammatory response to antigenic stimulus	biological_process	1	287	1	12622	0	0	43.9791	comp98100_c0_seq1
GO:0008569	ATP-dependent microtubule motor activity, minus-end-directed	molecular_function	1	287	1	12622	0	0	43.9791	comp98507_c0_seq1
GO:0004452	isopentenyl-diphosphate delta-isomerase activity	molecular_function	1	287	1	12622	0	0	43.9791	comp99579_c0_seq1
GO:0050992	dimethylallyl diphosphate biosynthetic process	biological_process	1	287	1	12622	0	0	43.9791	comp99579_c0_seq1
GO:0090302	APC-Cdc20 complex activity	molecular_function	4	287	5	12622	5.87355e-09	9.38202e-08	35.1833	comp119387_c0_seq1; comp125964_c0_seq1; comp127235_c0_seq1; comp127379_c0_seq1
GO:0007113	endomitotic cell cycle	biological_process	4	287	7	12622	1.18794e-07	1.87256e-06	25.1309	comp119387_c0_seq1; comp125964_c0_seq1; comp127235_c0_seq1; comp127379_c0_seq1
GO:0045842	positive regulation of mitotic metaphase/anaphase transition	biological_process	4	287	11	12622	2.42443e-06	3.77204e-05	15.9924	comp119387_c0_seq1; comp125964_c0_seq1; comp127235_c0_seq1; comp127379_c0_seq1
GO:0097487	multivesicular body, internal vesicle	cellular_component	3	287	6	12622	3.78857e-06	5.81886e-05	21.9895	comp105209_c1_seq1; comp116202_c0_seq1; comp121742_c1_seq1
GO:0005576	extracellular region	cellular_component	31	287	586	12622	3.86877e-06	5.86682e-05	2.32654	comp106785_c0_seq1; comp109312_c0_seq1; comp112352_c0_seq1; comp116682_c0_seq1; comp117312_c0_seq2; comp117400_c1_seq1; comp118141_c1_seq14; comp119062_c0_seq1; comp119423_c0_seq2; comp119814_c1_seq1; comp119994_c0_seq3; comp120390_c0_seq1; comp120722_c0_seq1; comp121182_c0_seq1; comp123878_c1_seq3; comp124889_c0_seq1; comp124977_c1_seq1; comp126021_c0_seq5; comp126579_c0_seq1; comp126667_c0_seq1…
GO:0005615	extracellular space	cellular_component	23	287	375	12622	4.94228e-06	7.40106e-05	2.69738	comp105209_c1_seq1; comp107790_c0_seq1; comp110378_c0_seq1; comp113433_c0_seq1; comp114062_c0_seq1; comp114682_c0_seq2; comp116202_c0_seq1; comp118141_c1_seq14; comp120623_c0_seq8; comp120722_c0_seq1; comp121182_c0_seq1; comp121248_c0_seq1; comp121898_c0_seq4; comp124616_c0_seq19; comp125100_c0_seq4; comp125544_c0_seq1; comp126021_c0_seq5; comp127397_c0_seq1; comp130606_c0_seq1; comp131229_c0_seq…
GO:0048757	pigment granule maturation	biological_process	3	287	7	12622	8.68161e-06	0.000125308	18.8482	comp105209_c1_seq1; comp116202_c0_seq1; comp121742_c1_seq1
GO:1900746	regulation of vascular endothelial growth factor signaling pathway	biological_process	3	287	7	12622	8.68161e-06	0.000125308	18.8482	comp105209_c1_seq1; comp116202_c0_seq1; comp121742_c1_seq1
GO:2001046	positive regulation of integrin-mediated signaling pathway	biological_process	3	287	7	12622	8.68161e-06	0.000125308	18.8482	comp105209_c1_seq1; comp116202_c0_seq1; comp121742_c1_seq1
GO:0005237	inhibitory extracellular ligand-gated ion channel activity	molecular_function	2	287	3	12622	1.16362e-05	0.000165954	29.3194	comp104720_c0_seq1; comp127154_c0_seq2
GO:0005680	anaphase-promoting complex	cellular_component	4	287	16	12622	2.08729e-05	0.000294185	10.9948	comp119387_c0_seq1; comp125964_c0_seq1; comp127235_c0_seq1; comp127379_c0_seq1
GO:0010642	negative regulation of platelet-derived growth factor receptor signaling pathway	biological_process	4	287	17	12622	2.90222e-05	0.000386317	10.348	comp113433_c0_seq1; comp114682_c0_seq2; comp118141_c1_seq14; comp121182_c0_seq1
GO:0060588	negative regulation of lipoprotein lipid oxidation	biological_process	4	287	17	12622	2.90222e-05	0.000386317	10.348	comp113433_c0_seq1; comp114682_c0_seq2; comp118141_c1_seq14; comp121182_c0_seq1
GO:1900016	negative regulation of cytokine production involved in inflammatory response	biological_process	4	287	17	12622	2.90222e-05	0.000386317	10.348	comp113433_c0_seq1; comp114682_c0_seq2; comp118141_c1_seq14; comp121182_c0_seq1
GO:2000098	negative regulation of smooth muscle cell-matrix adhesion	biological_process	4	287	17	12622	2.90222e-05	0.000386317	10.348	comp113433_c0_seq1; comp114682_c0_seq2; comp118141_c1_seq14; comp121182_c0_seq1
GO:2000405	negative regulation of T cell migration	biological_process	4	287	17	12622	2.90222e-05	0.000386317	10.348	comp113433_c0_seq1; comp114682_c0_seq2; comp118141_c1_seq14; comp121182_c0_seq1
GO:0031226	intrinsic component of plasma membrane	cellular_component	3	287	9	12622	3.0145e-05	0.000396854	14.6597	comp105209_c1_seq1; comp116202_c0_seq1; comp121742_c1_seq1
GO:0014012	peripheral nervous system axon regeneration	biological_process	4	287	18	12622	3.94404e-05	0.000508061	9.77313	comp113433_c0_seq1; comp114682_c0_seq2; comp118141_c1_seq14; comp121182_c0_seq1
GO:0071638	negative regulation of monocyte chemotactic protein-1 production	biological_process	4	287	18	12622	3.94404e-05	0.000508061	9.77313	comp113433_c0_seq1; comp114682_c0_seq2; comp118141_c1_seq14; comp121182_c0_seq1
GO:2000680	regulation of rubidium ion transport	biological_process	2	287	4	12622	4.57592e-05	0.000583186	21.9895	comp105209_c1_seq1; comp116202_c0_seq1
GO:0032259	methylation	biological_process	4	287	19	12622	5.25357e-05	0.000655601	9.25876	comp104919_c0_seq1; comp121460_c0_seq1; comp125895_c0_seq1; comp130800_c0_seq3
GO:0042308	negative regulation of protein import into nucleus	biological_process	4	287	19	12622	5.25357e-05	0.000655601	9.25876	comp113433_c0_seq1; comp114682_c0_seq2; comp118141_c1_seq14; comp121182_c0_seq1
GO:0051895	negative regulation of focal adhesion assembly	biological_process	4	287	20	12622	6.87518e-05	0.000840456	8.79582	comp113433_c0_seq1; comp114682_c0_seq2; comp118141_c1_seq14; comp121182_c0_seq1
GO:0031145	anaphase-promoting complex-dependent proteasomal ubiquitin-dependent protein catabolic process	biological_process	4	287	20	12622	6.87518e-05	0.000840456	8.79582	comp119387_c0_seq1; comp125964_c0_seq1; comp127235_c0_seq1; comp127379_c0_seq1
GO:0007306	eggshell chorion assembly	biological_process	3	287	11	12622	7.61542e-05	0.000921542	11.9943	comp107790_c0_seq1; comp120623_c0_seq8; comp131416_c0_seq1
GO:0016477	cell migration	biological_process	8	287	80	12622	8.08634e-05	0.000968743	4.39791	comp105209_c1_seq1; comp110231_c0_seq1; comp116202_c0_seq1; comp119876_c0_seq1; comp119994_c0_seq3; comp121557_c0_seq1; comp121742_c1_seq1; comp128490_c2_seq2
GO:0048662	negative regulation of smooth muscle cell proliferation	biological_process	4	287	21	12622	8.85684e-05	0.00105054	8.37697	comp113433_c0_seq1; comp114682_c0_seq2; comp118141_c1_seq14; comp121182_c0_seq1
GO:0015485	cholesterol binding	molecular_function	5	287	34	12622	0.000103182	0.00121188	6.46751	comp113433_c0_seq1; comp114565_c0_seq1; comp114682_c0_seq2; comp118141_c1_seq14; comp121182_c0_seq1
GO:0002092	positive regulation of receptor internalization	biological_process	3	287	12	12622	0.000112192	0.00125958	10.9948	comp105209_c1_seq1; comp116202_c0_seq1; comp121742_c1_seq1
GO:0035646	endosome to melanosome transport	biological_process	3	287	12	12622	0.000112192	0.00125958	10.9948	comp105209_c1_seq1; comp116202_c0_seq1; comp121742_c1_seq1
GO:0050811	GABA receptor binding	molecular_function	2	287	5	12622	0.000112469	0.00125958	17.5916	comp116261_c0_seq1; comp119631_c0_seq1
GO:0035925	mRNA 3'-UTR AU-rich region binding	molecular_function	2	287	5	12622	0.000112469	0.00125958	17.5916	comp119603_c0_seq1; comp125429_c0_seq3
GO:0000302	response to reactive oxygen species	biological_process	4	287	22	12622	0.0001125	0.00125958	7.9962	comp113433_c0_seq1; comp114682_c0_seq2; comp118141_c1_seq14; comp121182_c0_seq1
GO:0008757	S-adenosylmethionine-dependent methyltransferase activity	molecular_function	4	287	23	12622	0.000141095	0.00156511	7.64854	comp121460_c0_seq1; comp125895_c0_seq1; comp130800_c0_seq3; comp132671_c1_seq1
GO:1900153	positive regulation of nuclear-transcribed mRNA catabolic process, deadenylation-dependent decay	biological_process	3	287	13	12622	0.000159164	0.00174934	10.149	comp119603_c0_seq1; comp124139_c0_seq1; comp125429_c0_seq3
GO:0004867	serine-type endopeptidase inhibitor activity	molecular_function	6	287	54	12622	0.000207164	0.00225554	4.88657	comp119814_c1_seq1; comp121248_c0_seq1; comp124616_c0_seq19; comp130606_c0_seq1; comp131459_c0_seq1; comp77256_c0_seq1
GO:0004601	peroxidase activity	molecular_function	4	287	25	12622	0.000214634	0.00225554	7.03666	comp107790_c0_seq1; comp120623_c0_seq8; comp126579_c0_seq1; comp127080_c0_seq1
GO:0042744	hydrogen peroxide catabolic process	biological_process	4	287	25	12622	0.000214634	0.00225554	7.03666	comp107790_c0_seq1; comp120623_c0_seq8; comp126579_c0_seq1; comp127080_c0_seq1
GO:0042246	tissue regeneration	biological_process	4	287	25	12622	0.000214634	0.00225554	7.03666	comp113433_c0_seq1; comp114682_c0_seq2; comp118141_c1_seq14; comp121182_c0_seq1
GO:0048678	response to axon injury	biological_process	4	287	25	12622	0.000214634	0.00225554	7.03666	comp113433_c0_seq1; comp114682_c0_seq2; comp118141_c1_seq14; comp121182_c0_seq1
GO:0006828	manganese ion transport	biological_process	2	287	6	12622	0.00022115	0.00228394	14.6597	comp100130_c0_seq1; comp129926_c0_seq1
GO:0016715	oxidoreductase activity, acting on paired donors, with incorporation or reduction of molecular oxygen, reduced ascorbate as one donor, and incorporation of one atom of oxygen	molecular_function	2	287	6	12622	0.00022115	0.00228394	14.6597	comp131778_c0_seq1; comp132861_c0_seq2
GO:0005930	axoneme	cellular_component	5	287	41	12622	0.000301883	0.00309108	5.3633	comp105885_c0_seq3; comp112859_c0_seq2; comp114326_c0_seq2; comp116261_c0_seq1; comp119631_c0_seq1
GO:0031904	endosome lumen	cellular_component	2	287	7	12622	0.000380501	0.00324885	12.5655	comp105209_c1_seq1; comp116202_c0_seq1
GO:1903825	organic acid transmembrane transport	biological_process	2	287	7	12622	0.000380501	0.00324885	12.5655	comp113195_c0_seq1; comp119983_c0_seq2
GO:0008625	extrinsic apoptotic signaling pathway via death domain receptors	biological_process	2	287	7	12622	0.000380501	0.00324885	12.5655	comp116261_c0_seq1; comp119631_c0_seq1
GO:0050860	negative regulation of T cell receptor signaling pathway	biological_process	2	287	7	12622	0.000380501	0.00324885	12.5655	comp118169_c0_seq1; comp135822_c0_seq1
GO:0022626	cytosolic ribosome	cellular_component	4	287	29	12622	0.000445352	0.00324885	6.06608	comp113433_c0_seq1; comp114682_c0_seq2; comp118141_c1_seq14; comp121182_c0_seq1
GO:0005764	lysosome	cellular_component	11	287	170	12622	0.00050917	0.00324885	2.84571	comp108551_c0_seq1; comp116202_c0_seq1; comp116261_c0_seq1; comp119631_c0_seq1; comp121742_c1_seq1; comp122809_c0_seq1; comp123066_c0_seq1; comp123201_c0_seq4; comp126021_c0_seq5; comp128383_c0_seq1; comp130639_c0_seq18
GO:0010461	light-activated ion channel activity	molecular_function	1	287	2	12622	0.000515259	0.00324885	21.9895	comp100130_c0_seq1
GO:0035997	rhabdomere microvillus membrane	cellular_component	1	287	2	12622	0.000515259	0.00324885	21.9895	comp100130_c0_seq1
GO:0008626	granzyme-mediated apoptotic signaling pathway	biological_process	1	287	2	12622	0.000515259	0.00324885	21.9895	comp104643_c0_seq1
GO:0043323	positive regulation of natural killer cell degranulation	biological_process	1	287	2	12622	0.000515259	0.00324885	21.9895	comp104643_c0_seq1
GO:0044194	cytolytic granule	cellular_component	1	287	2	12622	0.000515259	0.00324885	21.9895	comp104643_c0_seq1
GO:0072594	establishment of protein localization to organelle	biological_process	1	287	2	12622	0.000515259	0.00324885	21.9895	comp104643_c0_seq1
GO:0000234	phosphoethanolamine N-methyltransferase activity	molecular_function	1	287	2	12622	0.000515259	0.00324885	21.9895	comp104919_c0_seq1
GO:0009826	unidimensional cell growth	biological_process	1	287	2	12622	0.000515259	0.00324885	21.9895	comp104919_c0_seq1
GO:0010183	pollen tube guidance	biological_process	1	287	2	12622	0.000515259	0.00324885	21.9895	comp104919_c0_seq1
GO:0031088	platelet dense granule membrane	cellular_component	1	287	2	12622	0.000515259	0.00324885	21.9895	comp105209_c1_seq1
GO:0030990	intraciliary transport particle	cellular_component	1	287	2	12622	0.000515259	0.00324885	21.9895	comp105885_c0_seq3
GO:0045504	dynein heavy chain binding	molecular_function	1	287	2	12622	0.000515259	0.00324885	21.9895	comp105885_c0_seq3
GO:0042767	ecdysteroid 22-hydroxylase activity	molecular_function	1	287	2	12622	0.000515259	0.00324885	21.9895	comp109070_c1_seq1
GO:0032703	negative regulation of interleukin-2 production	biological_process	1	287	2	12622	0.000515259	0.00324885	21.9895	comp112662_c0_seq1
GO:0033600	negative regulation of mammary gland epithelial cell proliferation	biological_process	1	287	2	12622	0.000515259	0.00324885	21.9895	comp112662_c0_seq1
GO:0035457	cellular response to interferon-alpha	biological_process	1	287	2	12622	0.000515259	0.00324885	21.9895	comp112662_c0_seq1
GO:0042421	norepinephrine biosynthetic process	biological_process	1	287	2	12622	0.000515259	0.00324885	21.9895	comp112662_c0_seq1
GO:0060017	parathyroid gland development	biological_process	1	287	2	12622	0.000515259	0.00324885	21.9895	comp112662_c0_seq1
GO:0061290	canonical Wnt signaling pathway involved in metanephric kidney development	biological_process	1	287	2	12622	0.000515259	0.00324885	21.9895	comp112662_c0_seq1
GO:2000611	positive regulation of thyroid hormone generation	biological_process	1	287	2	12622	0.000515259	0.00324885	21.9895	comp112662_c0_seq1
GO:0015143	urate transmembrane transporter activity	molecular_function	1	287	2	12622	0.000515259	0.00324885	21.9895	comp113195_c0_seq1
GO:0015747	urate transport	biological_process	1	287	2	12622	0.000515259	0.00324885	21.9895	comp113195_c0_seq1
GO:0018094	protein polyglycylation	biological_process	1	287	2	12622	0.000515259	0.00324885	21.9895	comp114326_c0_seq2
GO:0070735	protein-glycine ligase activity	molecular_function	1	287	2	12622	0.000515259	0.00324885	21.9895	comp114326_c0_seq2
GO:0070736	protein-glycine ligase activity, initiating	molecular_function	1	287	2	12622	0.000515259	0.00324885	21.9895	comp114326_c0_seq2
GO:0034379	very-low-density lipoprotein particle assembly	biological_process	1	287	2	12622	0.000515259	0.00324885	21.9895	comp114565_c0_seq1
GO:0021555	midbrain-hindbrain boundary morphogenesis	biological_process	1	287	2	12622	0.000515259	0.00324885	21.9895	comp116818_c0_seq1
GO:0021592	fourth ventricle development	biological_process	1	287	2	12622	0.000515259	0.00324885	21.9895	comp116818_c0_seq1
GO:0021678	third ventricle development	biological_process	1	287	2	12622	0.000515259	0.00324885	21.9895	comp116818_c0_seq1
GO:0021993	initiation of neural tube closure	biological_process	1	287	2	12622	0.000515259	0.00324885	21.9895	comp116818_c0_seq1
GO:0009436	glyoxylate catabolic process	biological_process	1	287	2	12622	0.000515259	0.00324885	21.9895	comp116880_c0_seq1
GO:0047305	(R)-3-amino-2-methylpropionate-pyruvate transaminase activity	molecular_function	1	287	2	12622	0.000515259	0.00324885	21.9895	comp116880_c0_seq1
GO:0007376	cephalic furrow formation	biological_process	1	287	2	12622	0.000515259	0.00324885	21.9895	comp118941_c1_seq2
GO:0061158	3'-UTR-mediated mRNA destabilization	biological_process	1	287	2	12622	0.000515259	0.00324885	21.9895	comp119603_c0_seq1
GO:0031258	lamellipodium membrane	cellular_component	1	287	2	12622	0.000515259	0.00324885	21.9895	comp119994_c0_seq3
GO:0048771	tissue remodeling	biological_process	1	287	2	12622	0.000515259	0.00324885	21.9895	comp119994_c0_seq3
GO:0042759	long-chain fatty acid biosynthetic process	biological_process	1	287	2	12622	0.000515259	0.00324885	21.9895	comp120390_c0_seq1
GO:0016314	phosphatidylinositol-3,4,5-trisphosphate 3-phosphatase activity	molecular_function	1	287	2	12622	0.000515259	0.00324885	21.9895	comp121028_c0_seq2
GO:1900062	regulation of replicative cell aging	biological_process	1	287	2	12622	0.000515259	0.00324885	21.9895	comp121200_c0_seq4
GO:0060072	large conductance calcium-activated potassium channel activity	molecular_function	1	287	2	12622	0.000515259	0.00324885	21.9895	comp122176_c1_seq1
GO:0050062	long-chain-fatty-acyl-CoA reductase activity	molecular_function	1	287	2	12622	0.000515259	0.00324885	21.9895	comp122509_c1_seq1
GO:0019953	sexual reproduction	biological_process	1	287	2	12622	0.000515259	0.00324885	21.9895	comp123066_c0_seq1
GO:0006939	smooth muscle contraction	biological_process	1	287	2	12622	0.000515259	0.00324885	21.9895	comp123086_c0_seq1
GO:0010738	regulation of protein kinase A signaling	biological_process	1	287	2	12622	0.000515259	0.00324885	21.9895	comp123086_c0_seq1
GO:0010880	regulation of release of sequestered calcium ion into cytosol by sarcoplasmic reticulum	biological_process	1	287	2	12622	0.000515259	0.00324885	21.9895	comp123086_c0_seq1
GO:0030593	neutrophil chemotaxis	biological_process	1	287	2	12622	0.000515259	0.00324885	21.9895	comp123086_c0_seq1
GO:0032729	positive regulation of interferon-gamma production	biological_process	1	287	2	12622	0.000515259	0.00324885	21.9895	comp123086_c0_seq1
GO:0032754	positive regulation of interleukin-5 production	biological_process	1	287	2	12622	0.000515259	0.00324885	21.9895	comp123086_c0_seq1
GO:0045822	negative regulation of heart contraction	biological_process	1	287	2	12622	0.000515259	0.00324885	21.9895	comp123086_c0_seq1
GO:0060314	regulation of ryanodine-sensitive calcium-release channel activity	biological_process	1	287	2	12622	0.000515259	0.00324885	21.9895	comp123086_c0_seq1
GO:0070935	3'-UTR-mediated mRNA stabilization	biological_process	1	287	2	12622	0.000515259	0.00324885	21.9895	comp124139_c0_seq1
GO:0000019	regulation of mitotic recombination	biological_process	1	287	2	12622	0.000515259	0.00324885	21.9895	comp125174_c0_seq1
GO:0032204	regulation of telomere maintenance	biological_process	1	287	2	12622	0.000515259	0.00324885	21.9895	comp125174_c0_seq1
GO:0061665	SUMO ligase activity	molecular_function	1	287	2	12622	0.000515259	0.00324885	21.9895	comp125174_c0_seq1
GO:0072080	nephron tubule development	biological_process	1	287	2	12622	0.000515259	0.00324885	21.9895	comp125429_c0_seq3
GO:2000737	negative regulation of stem cell differentiation	biological_process	1	287	2	12622	0.000515259	0.00324885	21.9895	comp125429_c0_seq3
GO:0006218	uridine catabolic process	biological_process	1	287	2	12622	0.000515259	0.00324885	21.9895	comp125653_c0_seq7
GO:0046135	pyrimidine nucleoside catabolic process	biological_process	1	287	2	12622	0.000515259	0.00324885	21.9895	comp125653_c0_seq7
GO:0008743	L-threonine 3-dehydrogenase activity	molecular_function	1	287	2	12622	0.000515259	0.00324885	21.9895	comp126312_c0_seq1
GO:0030421	defecation	biological_process	1	287	2	12622	0.000515259	0.00324885	21.9895	comp127154_c0_seq2
GO:0032264	IMP salvage	biological_process	1	287	2	12622	0.000515259	0.00324885	21.9895	comp127276_c0_seq1
GO:0008273	calcium, potassium:sodium antiporter activity	molecular_function	1	287	2	12622	0.000515259	0.00324885	21.9895	comp130288_c0_seq2
GO:0008117	sphinganine-1-phosphate aldolase activity	molecular_function	1	287	2	12622	0.000515259	0.00324885	21.9895	comp130456_c0_seq2
GO:0030149	sphingolipid catabolic process	biological_process	1	287	2	12622	0.000515259	0.00324885	21.9895	comp130456_c0_seq2
GO:0008196	vitellogenin receptor activity	molecular_function	1	287	2	12622	0.000515259	0.00324885	21.9895	comp132489_c0_seq1
GO:0031095	platelet dense tubular network membrane	cellular_component	1	287	2	12622	0.000515259	0.00324885	21.9895	comp39182_c0_seq1
GO:0045629	negative regulation of T-helper 2 cell differentiation	biological_process	1	287	2	12622	0.000515259	0.00324885	21.9895	comp98100_c0_seq1
GO:0007214	gamma-aminobutyric acid signaling pathway	biological_process	2	287	8	12622	0.00059857	0.00367737	10.9948	comp104720_c0_seq1; comp127154_c0_seq2
GO:0042743	hydrogen peroxide metabolic process	biological_process	2	287	8	12622	0.00059857	0.00367737	10.9948	comp107790_c0_seq1; comp120623_c0_seq8
GO:0005790	smooth endoplasmic reticulum	cellular_component	2	287	8	12622	0.00059857	0.00367737	10.9948	comp116261_c0_seq1; comp119631_c0_seq1
GO:0001817	regulation of cytokine production	biological_process	2	287	8	12622	0.00059857	0.00367737	10.9948	comp118169_c0_seq1; comp135822_c0_seq1
GO:0035290	trunk segmentation	biological_process	2	287	8	12622	0.00059857	0.00367737	10.9948	comp118941_c1_seq2; comp53390_c0_seq1
GO:0051225	spindle assembly	biological_process	3	287	19	12622	0.000774699	0.00473515	6.94407	comp123313_c0_seq2; comp128759_c0_seq8; comp98507_c0_seq1
GO:0004666	prostaglandin-endoperoxide synthase activity	molecular_function	2	287	9	12622	0.000882782	0.00531444	9.77313	comp107790_c0_seq1; comp120623_c0_seq8
GO:0007304	chorion-containing eggshell formation	biological_process	2	287	9	12622	0.000882782	0.00531444	9.77313	comp107790_c0_seq1; comp120623_c0_seq8
GO:0032504	multicellular organism reproduction	biological_process	2	287	9	12622	0.000882782	0.00531444	9.77313	comp122176_c1_seq1; comp132652_c0_seq1
GO:0005811	lipid particle	cellular_component	6	287	71	12622	0.00112034	0.00671084	3.71654	comp121460_c0_seq1; comp127915_c0_seq3; comp130478_c0_seq3; comp130800_c0_seq3; comp131818_c0_seq5; comp39182_c0_seq1
GO:0023014	signal transduction by protein phosphorylation	biological_process	3	287	21	12622	0.00115415	0.00681121	6.28273	comp110231_c0_seq1; comp121200_c0_seq4; comp121557_c0_seq1
GO:0031098	stress-activated protein kinase signaling cascade	biological_process	3	287	21	12622	0.00115415	0.00681121	6.28273	comp110231_c0_seq1; comp121200_c0_seq4; comp121557_c0_seq1
GO:0045165	cell fate commitment	biological_process	3	287	21	12622	0.00115415	0.00681121	6.28273	comp112662_c0_seq1; comp118941_c1_seq2; comp91391_c0_seq1
GO:0007568	aging	biological_process	5	287	54	12622	0.00135485	0.00727124	4.07214	comp113433_c0_seq1; comp114682_c0_seq2; comp118141_c1_seq14; comp121182_c0_seq1; comp123086_c0_seq1
GO:0071454	cellular response to anoxia	biological_process	1	287	3	12622	0.00152251	0.00727124	14.6597	comp100130_c0_seq1
GO:0097208	alveolar lamellar body	cellular_component	1	287	3	12622	0.00152251	0.00727124	14.6597	comp104643_c0_seq1
GO:0009555	pollen development	biological_process	1	287	3	12622	0.00152251	0.00727124	14.6597	comp104919_c0_seq1
GO:0003281	ventricular septum development	biological_process	1	287	3	12622	0.00152251	0.00727124	14.6597	comp112662_c0_seq1
GO:0006959	humoral immune response	biological_process	1	287	3	12622	0.00152251	0.00727124	14.6597	comp112662_c0_seq1
GO:0032753	positive regulation of interleukin-4 production	biological_process	1	287	3	12622	0.00152251	0.00727124	14.6597	comp112662_c0_seq1
GO:0043583	ear development	biological_process	1	287	3	12622	0.00152251	0.00727124	14.6597	comp112662_c0_seq1
GO:0045582	positive regulation of T cell differentiation	biological_process	1	287	3	12622	0.00152251	0.00727124	14.6597	comp112662_c0_seq1
GO:0048646	anatomical structure formation involved in morphogenesis	biological_process	1	287	3	12622	0.00152251	0.00727124	14.6597	comp112662_c0_seq1
GO:0060231	mesenchymal to epithelial transition	biological_process	1	287	3	12622	0.00152251	0.00727124	14.6597	comp112662_c0_seq1
GO:0071599	otic vesicle development	biological_process	1	287	3	12622	0.00152251	0.00727124	14.6597	comp112662_c0_seq1
GO:0060285	cilium-dependent cell motility	biological_process	1	287	3	12622	0.00152251	0.00727124	14.6597	comp112859_c0_seq2
GO:0035082	axoneme assembly	biological_process	1	287	3	12622	0.00152251	0.00727124	14.6597	comp114326_c0_seq2
GO:0050931	pigment cell differentiation	biological_process	1	287	3	12622	0.00152251	0.00727124	14.6597	comp116202_c0_seq1
GO:0016577	histone demethylation	biological_process	1	287	3	12622	0.00152251	0.00727124	14.6597	comp116818_c0_seq1
GO:0032452	histone demethylase activity	molecular_function	1	287	3	12622	0.00152251	0.00727124	14.6597	comp116818_c0_seq1
GO:0009997	negative regulation of cardioblast cell fate specification	biological_process	1	287	3	12622	0.00152251	0.00727124	14.6597	comp118941_c1_seq2
GO:0035253	ciliary rootlet	cellular_component	1	287	3	12622	0.00152251	0.00727124	14.6597	comp119103_c0_seq1
GO:0031103	axon regeneration	biological_process	1	287	3	12622	0.00152251	0.00727124	14.6597	comp119876_c0_seq1
GO:0097628	distal tip cell migration	biological_process	1	287	3	12622	0.00152251	0.00727124	14.6597	comp119876_c0_seq1
GO:0042940	D-amino acid transport	biological_process	1	287	3	12622	0.00152251	0.00727124	14.6597	comp119983_c0_seq2
GO:0042943	D-amino acid transmembrane transporter activity	molecular_function	1	287	3	12622	0.00152251	0.00727124	14.6597	comp119983_c0_seq2
GO:0030207	chondroitin sulfate catabolic process	biological_process	1	287	3	12622	0.00152251	0.00727124	14.6597	comp119994_c0_seq3
GO:0030208	dermatan sulfate biosynthetic process	biological_process	1	287	3	12622	0.00152251	0.00727124	14.6597	comp119994_c0_seq3
GO:0046514	ceramide catabolic process	biological_process	1	287	3	12622	0.00152251	0.00727124	14.6597	comp120390_c0_seq1
GO:0008343	adult feeding behavior	biological_process	1	287	3	12622	0.00152251	0.00727124	14.6597	comp120722_c0_seq1
GO:0004301	epoxide hydrolase activity	molecular_function	1	287	3	12622	0.00152251	0.00727124	14.6597	comp121268_c0_seq3
GO:0080019	fatty-acyl-CoA reductase (alcohol-forming) activity	molecular_function	1	287	3	12622	0.00152251	0.00727124	14.6597	comp122509_c1_seq1
GO:0043623	cellular protein complex assembly	biological_process	1	287	3	12622	0.00152251	0.00727124	14.6597	comp123086_c0_seq1
GO:2000042	negative regulation of double-strand break repair via homologous recombination	biological_process	1	287	3	12622	0.00152251	0.00727124	14.6597	comp125174_c0_seq1
GO:0043097	pyrimidine nucleoside salvage	biological_process	1	287	3	12622	0.00152251	0.00727124	14.6597	comp125653_c0_seq7
GO:0044206	UMP salvage	biological_process	1	287	3	12622	0.00152251	0.00727124	14.6597	comp125653_c0_seq7
GO:0008843	endochitinase activity	molecular_function	1	287	3	12622	0.00152251	0.00727124	14.6597	comp126021_c0_seq5
GO:0019518	L-threonine catabolic process to glycine	biological_process	1	287	3	12622	0.00152251	0.00727124	14.6597	comp126312_c0_seq1
GO:0046039	GTP metabolic process	biological_process	1	287	3	12622	0.00152251	0.00727124	14.6597	comp127276_c0_seq1
GO:0097009	energy homeostasis	biological_process	1	287	3	12622	0.00152251	0.00727124	14.6597	comp127276_c0_seq1
GO:0033993	response to lipid	biological_process	1	287	3	12622	0.00152251	0.00727124	14.6597	comp127397_c0_seq1
GO:0032307	negative regulation of prostaglandin secretion	biological_process	1	287	3	12622	0.00152251	0.00727124	14.6597	comp131818_c0_seq5
GO:0035338	long-chain fatty-acyl-CoA biosynthetic process	biological_process	1	287	3	12622	0.00152251	0.00727124	14.6597	comp131818_c0_seq5
GO:0047676	arachidonate-CoA ligase activity	molecular_function	1	287	3	12622	0.00152251	0.00727124	14.6597	comp131818_c0_seq5
GO:0020018	ciliary pocket membrane	cellular_component	1	287	3	12622	0.00152251	0.00727124	14.6597	comp39182_c0_seq1
GO:1901741	positive regulation of myoblast fusion	biological_process	1	287	3	12622	0.00152251	0.00727124	14.6597	comp39182_c0_seq1
GO:2001137	positive regulation of endocytic recycling	biological_process	1	287	3	12622	0.00152251	0.00727124	14.6597	comp39182_c0_seq1
GO:0060799	transforming growth factor beta receptor signaling pathway involved in endodermal cell fate specification	biological_process	1	287	3	12622	0.00152251	0.00727124	14.6597	comp53390_c0_seq1
GO:0061353	BMP signaling pathway involved in Malpighian tubule cell chemotaxis	biological_process	1	287	3	12622	0.00152251	0.00727124	14.6597	comp53390_c0_seq1
GO:0002829	negative regulation of type 2 immune response	biological_process	1	287	3	12622	0.00152251	0.00727124	14.6597	comp98100_c0_seq1
GO:0004222	metalloendopeptidase activity	molecular_function	7	287	96	12622	0.00152344	0.00727124	3.20681	comp118631_c0_seq4; comp121505_c0_seq1; comp121898_c0_seq4; comp125100_c0_seq4; comp125544_c0_seq1; comp131229_c0_seq1; comp131755_c0_seq1
GO:0008168	methyltransferase activity	molecular_function	6	287	75	12622	0.00154821	0.00736014	3.51833	comp104919_c0_seq1; comp109329_c0_seq1; comp119298_c0_seq2; comp122081_c1_seq5; comp123737_c0_seq1; comp127253_c0_seq1
GO:0042493	response to drug	biological_process	7	287	97	12622	0.00162837	0.00771064	3.17375	comp104720_c0_seq1; comp113195_c0_seq1; comp113433_c0_seq1; comp114682_c0_seq2; comp118141_c1_seq14; comp121182_c0_seq1; comp127154_c0_seq2
GO:0010951	negative regulation of endopeptidase activity	biological_process	3	287	23	12622	0.00164764	0.00777115	5.7364	comp121248_c0_seq1; comp124616_c0_seq19; comp131459_c0_seq1
GO:0043523	regulation of neuron apoptotic process	biological_process	2	287	11	12622	0.0016764	0.00781451	7.9962	comp112662_c0_seq1; comp122234_c0_seq3
GO:0001941	postsynaptic membrane organization	biological_process	2	287	11	12622	0.0016764	0.00781451	7.9962	comp117829_c0_seq1; comp132941_c0_seq2
GO:0097090	presynaptic membrane organization	biological_process	2	287	11	12622	0.0016764	0.00781451	7.9962	comp117829_c0_seq1; comp132941_c0_seq2
GO:0050852	T cell receptor signaling pathway	biological_process	2	287	12	12622	0.0021978	0.0100495	7.32985	comp112662_c0_seq1; comp123086_c0_seq1
GO:0045807	positive regulation of endocytosis	biological_process	2	287	12	12622	0.0021978	0.0100495	7.32985	comp116202_c0_seq1; comp121742_c1_seq1
GO:0044804	nucleophagy	biological_process	2	287	12	12622	0.0021978	0.0100495	7.32985	comp116261_c0_seq1; comp119631_c0_seq1
GO:0010469	regulation of receptor activity	biological_process	2	287	12	12622	0.0021978	0.0100495	7.32985	comp123086_c0_seq1; comp124889_c0_seq1
GO:0005244	voltage-gated ion channel activity	molecular_function	2	287	12	12622	0.0021978	0.0100495	7.32985	comp123346_c0_seq1; comp126831_c0_seq3
GO:0043025	neuronal cell body	cellular_component	10	287	179	12622	0.00262779	0.0112285	2.45693	comp104643_c0_seq1; comp113433_c0_seq1; comp114682_c0_seq2; comp118141_c1_seq14; comp119876_c0_seq1; comp120861_c0_seq1; comp121182_c0_seq1; comp129772_c1_seq1; comp131818_c0_seq5; comp132941_c0_seq2
GO:0009887	organ morphogenesis	biological_process	2	287	13	12622	0.0028094	0.0112285	6.76601	comp112662_c0_seq1; comp91391_c0_seq1
GO:0006997	nucleus organization	biological_process	2	287	13	12622	0.0028094	0.0112285	6.76601	comp123313_c0_seq2; comp128759_c0_seq8
GO:0090160	Golgi to lysosome transport	biological_process	1	287	4	12622	0.00299925	0.0112285	10.9948	comp104643_c0_seq1
GO:0002576	platelet degranulation	biological_process	1	287	4	12622	0.00299925	0.0112285	10.9948	comp105209_c1_seq1
GO:0070324	thyroid hormone binding	molecular_function	1	287	4	12622	0.00299925	0.0112285	10.9948	comp106051_c0_seq1
GO:0008362	chitin-based embryonic cuticle biosynthetic process	biological_process	1	287	4	12622	0.00299925	0.0112285	10.9948	comp109070_c1_seq1
GO:0003215	cardiac right ventricle morphogenesis	biological_process	1	287	4	12622	0.00299925	0.0112285	10.9948	comp112662_c0_seq1
GO:0032689	negative regulation of interferon-gamma production	biological_process	1	287	4	12622	0.00299925	0.0112285	10.9948	comp112662_c0_seq1
GO:0043370	regulation of CD4-positive, alpha-beta T cell differentiation	biological_process	1	287	4	12622	0.00299925	0.0112285	10.9948	comp112662_c0_seq1
GO:0048469	cell maturation	biological_process	1	287	4	12622	0.00299925	0.0112285	10.9948	comp112662_c0_seq1
GO:0048565	digestive tract development	biological_process	1	287	4	12622	0.00299925	0.0112285	10.9948	comp112662_c0_seq1
GO:2000352	negative regulation of endothelial cell apoptotic process	biological_process	1	287	4	12622	0.00299925	0.0112285	10.9948	comp112662_c0_seq1
GO:2000679	positive regulation of transcription regulatory region DNA binding	biological_process	1	287	4	12622	0.00299925	0.0112285	10.9948	comp112662_c0_seq1
GO:0046415	urate metabolic process	biological_process	1	287	4	12622	0.00299925	0.0112285	10.9948	comp113195_c0_seq1
GO:0004648	O-phospho-L-serine:2-oxoglutarate aminotransferase activity	molecular_function	1	287	4	12622	0.00299925	0.0112285	10.9948	comp114848_c0_seq1
GO:0006885	regulation of pH	biological_process	1	287	4	12622	0.00299925	0.0112285	10.9948	comp115100_c0_seq2
GO:0015385	sodium:proton antiporter activity	molecular_function	1	287	4	12622	0.00299925	0.0112285	10.9948	comp115100_c0_seq2
GO:0030902	hindbrain development	biological_process	1	287	4	12622	0.00299925	0.0112285	10.9948	comp116818_c0_seq1
GO:0015315	organophosphate:inorganic phosphate antiporter activity	molecular_function	1	287	4	12622	0.00299925	0.0112285	10.9948	comp119530_c0_seq1
GO:0055062	phosphate ion homeostasis	biological_process	1	287	4	12622	0.00299925	0.0112285	10.9948	comp119530_c0_seq1
GO:0043652	engulfment of apoptotic cell	biological_process	1	287	4	12622	0.00299925	0.0112285	10.9948	comp119876_c0_seq1
GO:0017040	ceramidase activity	molecular_function	1	287	4	12622	0.00299925	0.0112285	10.9948	comp120390_c0_seq1
GO:0008519	ammonium transmembrane transporter activity	molecular_function	1	287	4	12622	0.00299925	0.0112285	10.9948	comp121407_c0_seq2
GO:0006720	isoprenoid metabolic process	biological_process	1	287	4	12622	0.00299925	0.0112285	10.9948	comp122504_c0_seq1
GO:0048244	phytanoyl-CoA dioxygenase activity	molecular_function	1	287	4	12622	0.00299925	0.0112285	10.9948	comp122504_c0_seq1
GO:0097089	methyl-branched fatty acid metabolic process	biological_process	1	287	4	12622	0.00299925	0.0112285	10.9948	comp122504_c0_seq1
GO:0010025	wax biosynthetic process	biological_process	1	287	4	12622	0.00299925	0.0112285	10.9948	comp122509_c1_seq1
GO:0035336	long-chain fatty-acyl-CoA metabolic process	biological_process	1	287	4	12622	0.00299925	0.0112285	10.9948	comp122509_c1_seq1
GO:0003014	renal system process	biological_process	1	287	4	12622	0.00299925	0.0112285	10.9948	comp122809_c0_seq1
GO:1901185	negative regulation of ERBB signaling pathway	biological_process	1	287	4	12622	0.00299925	0.0112285	10.9948	comp122809_c0_seq1
GO:0050884	neuromuscular process controlling posture	biological_process	1	287	4	12622	0.00299925	0.0112285	10.9948	comp123066_c0_seq1
GO:0004115	3',5'-cyclic-AMP phosphodiesterase activity	molecular_function	1	287	4	12622	0.00299925	0.0112285	10.9948	comp123086_c0_seq1
GO:0014911	positive regulation of smooth muscle cell migration	biological_process	1	287	4	12622	0.00299925	0.0112285	10.9948	comp123086_c0_seq1
GO:0030814	regulation of cAMP metabolic process	biological_process	1	287	4	12622	0.00299925	0.0112285	10.9948	comp123086_c0_seq1
GO:0032743	positive regulation of interleukin-2 production	biological_process	1	287	4	12622	0.00299925	0.0112285	10.9948	comp123086_c0_seq1
GO:0086004	regulation of cardiac muscle cell contraction	biological_process	1	287	4	12622	0.00299925	0.0112285	10.9948	comp123086_c0_seq1
GO:0004385	guanylate kinase activity	molecular_function	1	287	4	12622	0.00299925	0.0112285	10.9948	comp124723_c0_seq10
GO:0046710	GDP metabolic process	biological_process	1	287	4	12622	0.00299925	0.0112285	10.9948	comp124723_c0_seq10
GO:0039020	pronephric nephron tubule development	biological_process	1	287	4	12622	0.00299925	0.0112285	10.9948	comp125429_c0_seq3
GO:0046033	AMP metabolic process	biological_process	1	287	4	12622	0.00299925	0.0112285	10.9948	comp127276_c0_seq1
GO:0019376	galactolipid catabolic process	biological_process	1	287	4	12622	0.00299925	0.0112285	10.9948	comp127397_c0_seq1
GO:0032094	response to food	biological_process	1	287	4	12622	0.00299925	0.0112285	10.9948	comp127397_c0_seq1
GO:0047714	galactolipase activity	molecular_function	1	287	4	12622	0.00299925	0.0112285	10.9948	comp127397_c0_seq1
GO:0007395	dorsal closure, spreading of leading edge cells	biological_process	1	287	4	12622	0.00299925	0.0112285	10.9948	comp128490_c2_seq2
GO:0046529	imaginal disc fusion, thorax closure	biological_process	1	287	4	12622	0.00299925	0.0112285	10.9948	comp128490_c2_seq2
GO:0060487	lung epithelial cell differentiation	biological_process	1	287	4	12622	0.00299925	0.0112285	10.9948	comp129898_c0_seq1
GO:0014909	smooth muscle cell migration	biological_process	1	287	4	12622	0.00299925	0.0112285	10.9948	comp129925_c1_seq5
GO:0030955	potassium ion binding	molecular_function	1	287	4	12622	0.00299925	0.0112285	10.9948	comp130288_c0_seq2
GO:0031402	sodium ion binding	molecular_function	1	287	4	12622	0.00299925	0.0112285	10.9948	comp130288_c0_seq2
GO:0060136	embryonic process involved in female pregnancy	biological_process	1	287	4	12622	0.00299925	0.0112285	10.9948	comp131818_c0_seq5
GO:0070672	response to interleukin-15	biological_process	1	287	4	12622	0.00299925	0.0112285	10.9948	comp131818_c0_seq5
GO:0042448	progesterone metabolic process	biological_process	1	287	4	12622	0.00299925	0.0112285	10.9948	comp135524_c0_seq1
GO:0050649	testosterone 6-beta-hydroxylase activity	molecular_function	1	287	4	12622	0.00299925	0.0112285	10.9948	comp135524_c0_seq1
GO:0010886	positive regulation of cholesterol storage	biological_process	1	287	4	12622	0.00299925	0.0112285	10.9948	comp39182_c0_seq1
GO:0007488	histoblast morphogenesis	biological_process	1	287	4	12622	0.00299925	0.0112285	10.9948	comp53390_c0_seq1
GO:0030618	transforming growth factor beta receptor, pathway-specific cytoplasmic mediator activity	molecular_function	1	287	4	12622	0.00299925	0.0112285	10.9948	comp53390_c0_seq1
GO:0045705	negative regulation of salivary gland boundary specification	biological_process	1	287	4	12622	0.00299925	0.0112285	10.9948	comp53390_c0_seq1
GO:0005262	calcium channel activity	molecular_function	4	287	44	12622	0.00308574	0.0115162	3.9981	comp100130_c0_seq1; comp123346_c0_seq1; comp126831_c0_seq3; comp130288_c0_seq2
GO:0004252	serine-type endopeptidase activity	molecular_function	9	287	158	12622	0.00328614	0.0122261	2.50514	comp110378_c0_seq1; comp117829_c0_seq1; comp119423_c0_seq2; comp120861_c0_seq1; comp123878_c1_seq3; comp124977_c1_seq1; comp126555_c0_seq1; comp131416_c0_seq1; comp131814_c0_seq5
GO:0032147	activation of protein kinase activity	biological_process	3	287	28	12622	0.00348489	0.0128186	4.71205	comp110231_c0_seq1; comp121200_c0_seq4; comp121557_c0_seq1
GO:0000272	polysaccharide catabolic process	biological_process	3	287	28	12622	0.00348489	0.0128186	4.71205	comp126021_c0_seq5; comp126601_c0_seq1; comp54356_c0_seq1
GO:0048365	Rac GTPase binding	molecular_function	2	287	14	12622	0.00351591	0.0128186	6.28273	comp110231_c0_seq1; comp121557_c0_seq1
GO:0000421	autophagosome membrane	cellular_component	2	287	14	12622	0.00351591	0.0128186	6.28273	comp116261_c0_seq1; comp119631_c0_seq1
GO:0048037	cofactor binding	molecular_function	2	287	14	12622	0.00351591	0.0128186	6.28273	comp122265_c0_seq1; comp122504_c0_seq1
GO:0004563	beta-N-acetylhexosaminidase activity	molecular_function	2	287	14	12622	0.00351591	0.0128186	6.28273	comp123066_c0_seq1; comp126601_c0_seq1
GO:0006629	lipid metabolic process	biological_process	5	287	65	12622	0.00352029	0.0128186	3.38301	comp113433_c0_seq1; comp114682_c0_seq2; comp118141_c1_seq14; comp121182_c0_seq1; comp131818_c0_seq5
GO:0031410	cytoplasmic vesicle	cellular_component	5	287	66	12622	0.00380007	0.0137954	3.33175	comp104643_c0_seq1; comp116261_c0_seq1; comp119631_c0_seq1; comp119876_c0_seq1; comp132489_c0_seq1
GO:0044297	cell body	cellular_component	2	287	15	12622	0.0043216	0.0156413	5.86388	comp116261_c0_seq1; comp119631_c0_seq1
GO:0005254	chloride channel activity	molecular_function	4	287	48	12622	0.00452002	0.0157719	3.66492	comp104720_c0_seq1; comp123346_c0_seq1; comp126831_c0_seq3; comp127154_c0_seq2
GO:0015279	store-operated calcium channel activity	molecular_function	1	287	5	12622	0.00492378	0.0157719	8.79582	comp100130_c0_seq1
GO:0016027	inaD signaling complex	cellular_component	1	287	5	12622	0.00492378	0.0157719	8.79582	comp100130_c0_seq1
GO:0006656	phosphatidylcholine biosynthetic process	biological_process	1	287	5	12622	0.00492378	0.0157719	8.79582	comp104919_c0_seq1
GO:0008508	bile acid:sodium symporter activity	molecular_function	1	287	5	12622	0.00492378	0.0157719	8.79582	comp108380_c0_seq2
GO:0006697	ecdysone biosynthetic process	biological_process	1	287	5	12622	0.00492378	0.0157719	8.79582	comp109070_c1_seq1
GO:0097264	self proteolysis	biological_process	1	287	5	12622	0.00492378	0.0157719	8.79582	comp111400_c0_seq1
GO:0002088	lens development in camera-type eye	biological_process	1	287	5	12622	0.00492378	0.0157719	8.79582	comp112662_c0_seq1
GO:0048485	sympathetic nervous system development	biological_process	1	287	5	12622	0.00492378	0.0157719	8.79582	comp112662_c0_seq1
GO:0070286	axonemal dynein complex assembly	biological_process	1	287	5	12622	0.00492378	0.0157719	8.79582	comp112859_c0_seq2
GO:0005914	spot adherens junction	cellular_component	1	287	5	12622	0.00492378	0.0157719	8.79582	comp115013_c1_seq5
GO:0016342	catenin complex	cellular_component	1	287	5	12622	0.00492378	0.0157719	8.79582	comp115013_c1_seq5
GO:0048596	embryonic camera-type eye morphogenesis	biological_process	1	287	5	12622	0.00492378	0.0157719	8.79582	comp116818_c0_seq1
GO:2000178	negative regulation of neural precursor cell proliferation	biological_process	1	287	5	12622	0.00492378	0.0157719	8.79582	comp116818_c0_seq1
GO:1901739	regulation of myoblast fusion	biological_process	1	287	5	12622	0.00492378	0.0157719	8.79582	comp118941_c1_seq2
GO:0016279	protein-lysine N-methyltransferase activity	molecular_function	1	287	5	12622	0.00492378	0.0157719	8.79582	comp119371_c0_seq1
GO:0018023	peptidyl-lysine trimethylation	biological_process	1	287	5	12622	0.00492378	0.0157719	8.79582	comp119371_c0_seq1
GO:0035435	phosphate ion transmembrane transport	biological_process	1	287	5	12622	0.00492378	0.0157719	8.79582	comp119530_c0_seq1
GO:0030891	VCB complex	cellular_component	1	287	5	12622	0.00492378	0.0157719	8.79582	comp119843_c2_seq2
GO:0070449	elongin complex	cellular_component	1	287	5	12622	0.00492378	0.0157719	8.79582	comp119843_c2_seq2
GO:0010171	body morphogenesis	biological_process	1	287	5	12622	0.00492378	0.0157719	8.79582	comp119876_c0_seq1
GO:0010172	embryonic body morphogenesis	biological_process	1	287	5	12622	0.00492378	0.0157719	8.79582	comp119876_c0_seq1
GO:0045138	nematode male tail tip morphogenesis	biological_process	1	287	5	12622	0.00492378	0.0157719	8.79582	comp119876_c0_seq1
GO:0007622	rhythmic behavior	biological_process	1	287	5	12622	0.00492378	0.0157719	8.79582	comp120722_c0_seq1
GO:0006883	cellular sodium ion homeostasis	biological_process	1	287	5	12622	0.00492378	0.0157719	8.79582	comp120861_c0_seq1
GO:0017080	sodium channel regulator activity	molecular_function	1	287	5	12622	0.00492378	0.0157719	8.79582	comp120861_c0_seq1
GO:0017166	vinculin binding	molecular_function	1	287	5	12622	0.00492378	0.0157719	8.79582	comp121024_c0_seq2
GO:0008611	ether lipid biosynthetic process	biological_process	1	287	5	12622	0.00492378	0.0157719	8.79582	comp122509_c1_seq1
GO:0006624	vacuolar protein processing	biological_process	1	287	5	12622	0.00492378	0.0157719	8.79582	comp122809_c0_seq1
GO:0006689	ganglioside catabolic process	biological_process	1	287	5	12622	0.00492378	0.0157719	8.79582	comp123066_c0_seq1
GO:0048667	cell morphogenesis involved in neuron differentiation	biological_process	1	287	5	12622	0.00492378	0.0157719	8.79582	comp123066_c0_seq1
GO:0071889	14-3-3 protein binding	molecular_function	1	287	5	12622	0.00492378	0.0157719	8.79582	comp124139_c0_seq1
GO:0046037	GMP metabolic process	biological_process	1	287	5	12622	0.00492378	0.0157719	8.79582	comp124723_c0_seq10
GO:0005088	Ras guanyl-nucleotide exchange factor activity	molecular_function	1	287	5	12622	0.00492378	0.0157719	8.79582	comp124765_c0_seq2
GO:0009166	nucleotide catabolic process	biological_process	1	287	5	12622	0.00492378	0.0157719	8.79582	comp125653_c0_seq7
GO:0004620	phospholipase activity	molecular_function	1	287	5	12622	0.00492378	0.0157719	8.79582	comp127397_c0_seq1
GO:0004500	dopamine beta-monooxygenase activity	molecular_function	1	287	5	12622	0.00492378	0.0157719	8.79582	comp128759_c0_seq8
GO:0018146	keratan sulfate biosynthetic process	biological_process	1	287	5	12622	0.00492378	0.0157719	8.79582	comp129485_c0_seq1
GO:0061088	regulation of sequestering of zinc ion	biological_process	1	287	5	12622	0.00492378	0.0157719	8.79582	comp129926_c0_seq1
GO:0004565	beta-galactosidase activity	molecular_function	1	287	5	12622	0.00492378	0.0157719	8.79582	comp130639_c0_seq18
GO:0001653	peptide receptor activity	molecular_function	1	287	5	12622	0.00492378	0.0157719	8.79582	comp131409_c0_seq1
GO:0060996	dendritic spine development	biological_process	1	287	5	12622	0.00492378	0.0157719	8.79582	comp131818_c0_seq5
GO:0048058	compound eye corneal lens development	biological_process	1	287	5	12622	0.00492378	0.0157719	8.79582	comp132941_c0_seq2
GO:0006032	chitin catabolic process	biological_process	3	287	31	12622	0.00507739	0.0162206	4.25604	comp126021_c0_seq5; comp126601_c0_seq1; comp54356_c0_seq1
GO:0030246	carbohydrate binding	molecular_function	7	287	117	12622	0.00521213	0.0164029	2.63123	comp111400_c0_seq1; comp116682_c0_seq1; comp117400_c1_seq1; comp128383_c0_seq1; comp132652_c0_seq1; comp133291_c0_seq1; comp134468_c3_seq1
GO:0043408	regulation of MAPK cascade	biological_process	2	287	16	12622	0.00523031	0.0164029	5.49739	comp110231_c0_seq1; comp121557_c0_seq1
GO:0006695	cholesterol biosynthetic process	biological_process	2	287	16	12622	0.00523031	0.0164029	5.49739	comp112549_c0_seq1; comp99579_c0_seq1
GO:0034332	adherens junction organization	biological_process	2	287	16	12622	0.00523031	0.0164029	5.49739	comp115013_c1_seq5; comp128490_c2_seq2
GO:0000407	pre-autophagosomal structure	cellular_component	2	287	16	12622	0.00523031	0.0164029	5.49739	comp116261_c0_seq1; comp119631_c0_seq1
GO:0006402	mRNA catabolic process	biological_process	2	287	16	12622	0.00523031	0.0164029	5.49739	comp124139_c0_seq1; comp125429_c0_seq3
GO:0004806	triglyceride lipase activity	molecular_function	2	287	16	12622	0.00523031	0.0164029	5.49739	comp127397_c0_seq1; comp134511_c0_seq4
GO:0006633	fatty acid biosynthetic process	biological_process	4	287	50	12622	0.00539122	0.0168634	3.51833	comp110935_c0_seq5; comp112506_c0_seq1; comp124924_c0_seq1; comp127309_c0_seq1
GO:0005319	lipid transporter activity	molecular_function	3	287	32	12622	0.00570069	0.017785	4.12304	comp118141_c1_seq14; comp121182_c0_seq1; comp134036_c0_seq1
GO:0061025	membrane fusion	biological_process	2	287	17	12622	0.00624543	0.0192836	5.17401	comp116261_c0_seq1; comp119631_c0_seq1
GO:0044255	cellular lipid metabolic process	biological_process	2	287	17	12622	0.00624543	0.0192836	5.17401	comp121268_c0_seq3; comp131818_c0_seq5
GO:0045887	positive regulation of synaptic growth at neuromuscular junction	biological_process	2	287	17	12622	0.00624543	0.0192836	5.17401	comp124889_c0_seq1; comp53390_c0_seq1
GO:0004527	exonuclease activity	molecular_function	2	287	17	12622	0.00624543	0.0192836	5.17401	comp127673_c0_seq2; comp134598_c0_seq1
GO:0042470	melanosome	cellular_component	4	287	52	12622	0.00637483	0.0196325	3.38301	comp104643_c0_seq1; comp105209_c1_seq1; comp116202_c0_seq1; comp121742_c1_seq1
GO:0051321	meiotic cell cycle	biological_process	3	287	34	12622	0.00709594	0.0204111	3.88051	comp123313_c0_seq2; comp128759_c0_seq8; comp134851_c0_seq5
GO:0007589	body fluid secretion	biological_process	1	287	6	12622	0.00727509	0.0204111	7.32985	comp100130_c0_seq1
GO:0004784	superoxide dismutase activity	molecular_function	1	287	6	12622	0.00727509	0.0204111	7.32985	comp105620_c0_seq1
GO:0004887	thyroid hormone receptor activity	molecular_function	1	287	6	12622	0.00727509	0.0204111	7.32985	comp106051_c0_seq1
GO:0001085	RNA polymerase II transcription factor binding	molecular_function	1	287	6	12622	0.00727509	0.0204111	7.32985	comp112662_c0_seq1
GO:0010975	regulation of neuron projection development	biological_process	1	287	6	12622	0.00727509	0.0204111	7.32985	comp112662_c0_seq1
GO:0014065	phosphatidylinositol 3-kinase signaling	biological_process	1	287	6	12622	0.00727509	0.0204111	7.32985	comp112662_c0_seq1
GO:0060037	pharyngeal system development	biological_process	1	287	6	12622	0.00727509	0.0204111	7.32985	comp112662_c0_seq1
GO:0060323	head morphogenesis	biological_process	1	287	6	12622	0.00727509	0.0204111	7.32985	comp115013_c1_seq5
GO:0030277	maintenance of gastrointestinal epithelium	biological_process	1	287	6	12622	0.00727509	0.0204111	7.32985	comp117312_c0_seq2
GO:0007366	periodic partitioning by pair rule gene	biological_process	1	287	6	12622	0.00727509	0.0204111	7.32985	comp118941_c1_seq2
GO:0035289	posterior head segmentation	biological_process	1	287	6	12622	0.00727509	0.0204111	7.32985	comp118941_c1_seq2
GO:0021772	olfactory bulb development	biological_process	1	287	6	12622	0.00727509	0.0204111	7.32985	comp119082_c0_seq1
GO:0016246	RNA interference	biological_process	1	287	6	12622	0.00727509	0.0204111	7.32985	comp119603_c0_seq1
GO:0007617	mating behavior	biological_process	1	287	6	12622	0.00727509	0.0204111	7.32985	comp120722_c0_seq1
GO:2001020	regulation of response to DNA damage stimulus	biological_process	1	287	6	12622	0.00727509	0.0204111	7.32985	comp121200_c0_seq4
GO:0010633	negative regulation of epithelial cell migration	biological_process	1	287	6	12622	0.00727509	0.0204111	7.32985	comp121742_c1_seq1
GO:0006198	cAMP catabolic process	biological_process	1	287	6	12622	0.00727509	0.0204111	7.32985	comp123086_c0_seq1
GO:0033137	negative regulation of peptidyl-serine phosphorylation	biological_process	1	287	6	12622	0.00727509	0.0204111	7.32985	comp123086_c0_seq1
GO:0061028	establishment of endothelial barrier	biological_process	1	287	6	12622	0.00727509	0.0204111	7.32985	comp123086_c0_seq1
GO:0043488	regulation of mRNA stability	biological_process	1	287	6	12622	0.00727509	0.0204111	7.32985	comp125429_c0_seq3
GO:0048103	somatic stem cell division	biological_process	1	287	6	12622	0.00727509	0.0204111	7.32985	comp125429_c0_seq3
GO:0060216	definitive hemopoiesis	biological_process	1	287	6	12622	0.00727509	0.0204111	7.32985	comp125429_c0_seq3
GO:0006206	pyrimidine nucleobase metabolic process	biological_process	1	287	6	12622	0.00727509	0.0204111	7.32985	comp125653_c0_seq7
GO:0050479	glyceryl-ether monooxygenase activity	molecular_function	1	287	6	12622	0.00727509	0.0204111	7.32985	comp127309_c0_seq1
GO:0005720	nuclear heterochromatin	cellular_component	1	287	6	12622	0.00727509	0.0204111	7.32985	comp127897_c0_seq1
GO:0010369	chromocenter	cellular_component	1	287	6	12622	0.00727509	0.0204111	7.32985	comp127897_c0_seq1
GO:0047536	2-aminoadipate transaminase activity	molecular_function	1	287	6	12622	0.00727509	0.0204111	7.32985	comp130351_c0_seq3
GO:0016831	carboxy-lyase activity	molecular_function	1	287	6	12622	0.00727509	0.0204111	7.32985	comp130456_c0_seq2
GO:0030414	peptidase inhibitor activity	molecular_function	1	287	6	12622	0.00727509	0.0204111	7.32985	comp130606_c0_seq1
GO:0030285	integral component of synaptic vesicle membrane	cellular_component	1	287	6	12622	0.00727509	0.0204111	7.32985	comp131373_c0_seq1
GO:0004983	neuropeptide Y receptor activity	molecular_function	1	287	6	12622	0.00727509	0.0204111	7.32985	comp131409_c0_seq1
GO:0031957	very long-chain fatty acid-CoA ligase activity	molecular_function	1	287	6	12622	0.00727509	0.0204111	7.32985	comp131818_c0_seq5
GO:0030135	coated vesicle	cellular_component	1	287	6	12622	0.00727509	0.0204111	7.32985	comp132489_c0_seq1
GO:0051292	nuclear pore complex assembly	biological_process	1	287	6	12622	0.00727509	0.0204111	7.32985	comp135515_c0_seq4
GO:0034383	low-density lipoprotein particle clearance	biological_process	1	287	6	12622	0.00727509	0.0204111	7.32985	comp39182_c0_seq1
GO:0048100	wing disc anterior/posterior pattern formation	biological_process	1	287	6	12622	0.00727509	0.0204111	7.32985	comp53390_c0_seq1
GO:0097225	sperm midpiece	cellular_component	1	287	6	12622	0.00727509	0.0204111	7.32985	comp98366_c0_seq1
GO:0010595	positive regulation of endothelial cell migration	biological_process	2	287	18	12622	0.00736999	0.0205331	4.88657	comp112662_c0_seq1; comp129925_c1_seq5
GO:0000422	mitophagy	biological_process	2	287	18	12622	0.00736999	0.0205331	4.88657	comp116261_c0_seq1; comp119631_c0_seq1
GO:0035019	somatic stem cell population maintenance	biological_process	2	287	18	12622	0.00736999	0.0205331	4.88657	comp125429_c0_seq3; comp53390_c0_seq1
GO:0050877	neurological system process	biological_process	3	287	35	12622	0.007871	0.0218274	3.76964	comp104720_c0_seq1; comp127154_c0_seq2; comp127520_c0_seq2
GO:0005776	autophagosome	cellular_component	3	287	35	12622	0.007871	0.0218274	3.76964	comp116261_c0_seq1; comp119631_c0_seq1; comp125948_c0_seq1
GO:0004190	aspartic-type endopeptidase activity	molecular_function	15	287	359	12622	0.00808323	0.0223642	1.83757	comp108551_c0_seq1; comp121834_c0_seq1; comp126116_c1_seq19; comp130571_c0_seq21; comp134786_c0_seq4; comp134928_c0_seq3; comp134940_c1_seq2; comp135153_c0_seq1; comp135335_c0_seq1; comp135415_c0_seq1; comp135558_c0_seq3; comp135575_c0_seq1; comp135633_c0_seq1; comp135695_c1_seq1; comp135760_c1_seq1
GO:0001745	compound eye morphogenesis	biological_process	3	287	36	12622	0.00869966	0.0240143	3.66492	comp128119_c0_seq18; comp132941_c0_seq2; comp53390_c0_seq1
GO:0007067	mitotic nuclear division	biological_process	8	287	155	12622	0.00897148	0.0247077	2.26989	comp119387_c0_seq1; comp121200_c0_seq4; comp123313_c0_seq2; comp124361_c0_seq2; comp125964_c0_seq1; comp127235_c0_seq1; comp127379_c0_seq1; comp128759_c0_seq8
GO:0030204	chondroitin sulfate metabolic process	biological_process	2	287	20	12622	0.00995756	0.0254649	4.39791	comp119994_c0_seq3; comp124673_c0_seq1
GO:0048041	focal adhesion assembly	biological_process	1	287	7	12622	0.0100329	0.0254649	6.28273	comp111585_c0_seq1
GO:0045786	negative regulation of cell cycle	biological_process	1	287	7	12622	0.0100329	0.0254649	6.28273	comp112662_c0_seq1
GO:0048468	cell development	biological_process	1	287	7	12622	0.0100329	0.0254649	6.28273	comp112662_c0_seq1
GO:0048538	thymus development	biological_process	1	287	7	12622	0.0100329	0.0254649	6.28273	comp112662_c0_seq1
GO:0071353	cellular response to interleukin-4	biological_process	1	287	7	12622	0.0100329	0.0254649	6.28273	comp112662_c0_seq1
GO:0006564	L-serine biosynthetic process	biological_process	1	287	7	12622	0.0100329	0.0254649	6.28273	comp114848_c0_seq1
GO:0035518	histone H2A monoubiquitination	biological_process	1	287	7	12622	0.0100329	0.0254649	6.28273	comp116818_c0_seq1
GO:0008453	alanine-glyoxylate transaminase activity	molecular_function	1	287	7	12622	0.0100329	0.0254649	6.28273	comp116880_c0_seq1
GO:0045429	positive regulation of nitric oxide biosynthetic process	biological_process	1	287	7	12622	0.0100329	0.0254649	6.28273	comp116880_c0_seq1
GO:0001227	transcriptional repressor activity, RNA polymerase II transcription regulatory region sequence-specific binding	molecular_function	1	287	7	12622	0.0100329	0.0254649	6.28273	comp119082_c0_seq1
GO:0033563	dorsal/ventral axon guidance	biological_process	1	287	7	12622	0.0100329	0.0254649	6.28273	comp119876_c0_seq1
GO:0046512	sphingosine biosynthetic process	biological_process	1	287	7	12622	0.0100329	0.0254649	6.28273	comp120390_c0_seq1
GO:0045785	positive regulation of cell adhesion	biological_process	1	287	7	12622	0.0100329	0.0254649	6.28273	comp121742_c1_seq1
GO:0030016	myofibril	cellular_component	1	287	7	12622	0.0100329	0.0254649	6.28273	comp123086_c0_seq1
GO:0034704	calcium channel complex	cellular_component	1	287	7	12622	0.0100329	0.0254649	6.28273	comp123086_c0_seq1
GO:0048661	positive regulation of smooth muscle cell proliferation	biological_process	1	287	7	12622	0.0100329	0.0254649	6.28273	comp123086_c0_seq1
GO:0050900	leukocyte migration	biological_process	1	287	7	12622	0.0100329	0.0254649	6.28273	comp123086_c0_seq1
GO:0030727	germarium-derived female germ-line cyst formation	biological_process	1	287	7	12622	0.0100329	0.0254649	6.28273	comp124099_c0_seq1
GO:0035278	negative regulation of translation involved in gene silencing by miRNA	biological_process	1	287	7	12622	0.0100329	0.0254649	6.28273	comp124139_c0_seq1
GO:0009698	phenylpropanoid metabolic process	biological_process	1	287	7	12622	0.0100329	0.0254649	6.28273	comp124873_c0_seq3
GO:0016207	4-coumarate-CoA ligase activity	molecular_function	1	287	7	12622	0.0100329	0.0254649	6.28273	comp124873_c0_seq3
GO:0033691	sialic acid binding	molecular_function	1	287	7	12622	0.0100329	0.0254649	6.28273	comp124889_c0_seq1
GO:0048793	pronephros development	biological_process	1	287	7	12622	0.0100329	0.0254649	6.28273	comp125429_c0_seq3
GO:0006567	threonine catabolic process	biological_process	1	287	7	12622	0.0100329	0.0254649	6.28273	comp126312_c0_seq1
GO:0034364	high-density lipoprotein particle	cellular_component	1	287	7	12622	0.0100329	0.0254649	6.28273	comp127242_c0_seq1
GO:0047372	acylglycerol lipase activity	molecular_function	1	287	7	12622	0.0100329	0.0254649	6.28273	comp127397_c0_seq1
GO:0031618	nuclear pericentric heterochromatin	cellular_component	1	287	7	12622	0.0100329	0.0254649	6.28273	comp127897_c0_seq1
GO:0036335	intestinal stem cell homeostasis	biological_process	1	287	7	12622	0.0100329	0.0254649	6.28273	comp128490_c2_seq2
GO:0090136	epithelial cell-cell adhesion	biological_process	1	287	7	12622	0.0100329	0.0254649	6.28273	comp128490_c2_seq2
GO:0001517	N-acetylglucosamine 6-O-sulfotransferase activity	molecular_function	1	287	7	12622	0.0100329	0.0254649	6.28273	comp129485_c0_seq1
GO:0016540	protein autoprocessing	biological_process	1	287	7	12622	0.0100329	0.0254649	6.28273	comp129772_c1_seq1
GO:0070189	kynurenine metabolic process	biological_process	1	287	7	12622	0.0100329	0.0254649	6.28273	comp130351_c0_seq3
GO:0097052	L-kynurenine metabolic process	biological_process	1	287	7	12622	0.0100329	0.0254649	6.28273	comp130351_c0_seq3
GO:0016973	poly(A)+ mRNA export from nucleus	biological_process	1	287	7	12622	0.0100329	0.0254649	6.28273	comp135515_c0_seq4
GO:0004322	ferroxidase activity	molecular_function	1	287	7	12622	0.0100329	0.0254649	6.28273	comp39440_c0_seq1
GO:0008199	ferric iron binding	molecular_function	1	287	7	12622	0.0100329	0.0254649	6.28273	comp39440_c0_seq1
GO:0006006	glucose metabolic process	biological_process	4	287	58	12622	0.0100704	0.0255059	3.03304	comp113433_c0_seq1; comp114682_c0_seq2; comp118141_c1_seq14; comp121182_c0_seq1
GO:0007160	cell-matrix adhesion	biological_process	3	287	38	12622	0.0105233	0.026597	3.47203	comp105209_c1_seq1; comp116202_c0_seq1; comp121742_c1_seq1
GO:0048471	perinuclear region of cytoplasm	cellular_component	11	287	248	12622	0.0113198	0.0285498	1.95069	comp104643_c0_seq1; comp113433_c0_seq1; comp114682_c0_seq2; comp116261_c0_seq1; comp118141_c1_seq14; comp119631_c0_seq1; comp121182_c0_seq1; comp121898_c0_seq4; comp125100_c0_seq4; comp131229_c0_seq1; comp39182_c0_seq1
GO:0001558	regulation of cell growth	biological_process	2	287	21	12622	0.0114248	0.0286337	4.18849	comp109312_c0_seq1; comp112352_c0_seq1
GO:0009615	response to virus	biological_process	2	287	21	12622	0.0114248	0.0286337	4.18849	comp112662_c0_seq1; comp130478_c0_seq3
GO:0000980	RNA polymerase II distal enhancer sequence-specific DNA binding	molecular_function	2	287	21	12622	0.0114248	0.0286337	4.18849	comp118941_c1_seq2; comp53390_c0_seq1
GO:0004519	endonuclease activity	molecular_function	13	287	312	12622	0.0121275	0.0302431	1.83246	comp121834_c0_seq1; comp126116_c1_seq19; comp130571_c0_seq21; comp134786_c0_seq4; comp134940_c1_seq2; comp135153_c0_seq1; comp135335_c0_seq1; comp135415_c0_seq1; comp135558_c0_seq3; comp135575_c0_seq1; comp135695_c1_seq1; comp135709_c1_seq3; comp135760_c1_seq1
GO:0007596	blood coagulation	biological_process	4	287	61	12622	0.0123781	0.0302431	2.88388	comp105209_c1_seq1; comp110378_c0_seq1; comp124977_c1_seq1; comp127897_c0_seq1
GO:0006812	cation transport	biological_process	2	287	22	12622	0.0130099	0.0302431	3.9981	comp100130_c0_seq1; comp126499_c0_seq9
GO:0001516	prostaglandin biosynthetic process	biological_process	2	287	22	12622	0.0130099	0.0302431	3.9981	comp107790_c0_seq1; comp120623_c0_seq8
GO:0005913	cell-cell adherens junction	cellular_component	2	287	22	12622	0.0130099	0.0302431	3.9981	comp115013_c1_seq5; comp128119_c0_seq18
GO:0007163	establishment or maintenance of cell polarity	biological_process	2	287	22	12622	0.0130099	0.0302431	3.9981	comp115013_c1_seq5; comp121557_c0_seq1
GO:0030203	glycosaminoglycan metabolic process	biological_process	2	287	22	12622	0.0130099	0.0302431	3.9981	comp119994_c0_seq3; comp123066_c0_seq1
GO:0008375	acetylglucosaminyltransferase activity	molecular_function	2	287	22	12622	0.0130099	0.0302431	3.9981	comp123343_c0_seq2; comp126566_c1_seq2
GO:0031512	motile primary cilium	cellular_component	1	287	8	12622	0.0131777	0.0302431	5.49739	comp105885_c0_seq3
GO:0031929	TOR signaling	biological_process	1	287	8	12622	0.0131777	0.0302431	5.49739	comp112662_c0_seq1
GO:0035162	embryonic hemopoiesis	biological_process	1	287	8	12622	0.0131777	0.0302431	5.49739	comp112662_c0_seq1
GO:0042491	auditory receptor cell differentiation	biological_process	1	287	8	12622	0.0131777	0.0302431	5.49739	comp112662_c0_seq1
GO:0070888	E-box binding	molecular_function	1	287	8	12622	0.0131777	0.0302431	5.49739	comp112662_c0_seq1
GO:0071773	cellular response to BMP stimulus	biological_process	1	287	8	12622	0.0131777	0.0302431	5.49739	comp112662_c0_seq1
GO:0033344	cholesterol efflux	biological_process	1	287	8	12622	0.0131777	0.0302431	5.49739	comp114565_c0_seq1
GO:0051864	histone demethylase activity (H3-K36 specific)	molecular_function	1	287	8	12622	0.0131777	0.0302431	5.49739	comp116818_c0_seq1
GO:0007512	adult heart development	biological_process	1	287	8	12622	0.0131777	0.0302431	5.49739	comp118941_c1_seq2
GO:0008595	anterior/posterior axis specification, embryo	biological_process	1	287	8	12622	0.0131777	0.0302431	5.49739	comp118941_c1_seq2
GO:0005283	sodium:amino acid symporter activity	molecular_function	1	287	8	12622	0.0131777	0.0302431	5.49739	comp119983_c0_seq2
GO:0015175	neutral amino acid transmembrane transporter activity	molecular_function	1	287	8	12622	0.0131777	0.0302431	5.49739	comp119983_c0_seq2
GO:0007338	single fertilization	biological_process	1	287	8	12622	0.0131777	0.0302431	5.49739	comp122176_c1_seq1
GO:0001561	fatty acid alpha-oxidation	biological_process	1	287	8	12622	0.0131777	0.0302431	5.49739	comp122504_c0_seq1
GO:0017091	AU-rich element binding	molecular_function	1	287	8	12622	0.0131777	0.0302431	5.49739	comp124139_c0_seq1
GO:0042176	regulation of protein catabolic process	biological_process	1	287	8	12622	0.0131777	0.0302431	5.49739	comp124616_c0_seq19
GO:0002162	dystroglycan binding	molecular_function	1	287	8	12622	0.0131777	0.0302431	5.49739	comp124889_c0_seq1
GO:0007213	G-protein coupled acetylcholine receptor signaling pathway	biological_process	1	287	8	12622	0.0131777	0.0302431	5.49739	comp124889_c0_seq1
GO:0030548	acetylcholine receptor regulator activity	molecular_function	1	287	8	12622	0.0131777	0.0302431	5.49739	comp124889_c0_seq1
GO:0035374	chondroitin sulfate binding	molecular_function	1	287	8	12622	0.0131777	0.0302431	5.49739	comp124889_c0_seq1
GO:0043236	laminin binding	molecular_function	1	287	8	12622	0.0131777	0.0302431	5.49739	comp124889_c0_seq1
GO:0006139	nucleobase-containing compound metabolic process	biological_process	1	287	8	12622	0.0131777	0.0302431	5.49739	comp125653_c0_seq7
GO:0046485	ether lipid metabolic process	biological_process	1	287	8	12622	0.0131777	0.0302431	5.49739	comp127309_c0_seq1
GO:0016298	lipase activity	molecular_function	1	287	8	12622	0.0131777	0.0302431	5.49739	comp127397_c0_seq1
GO:0043277	apoptotic cell clearance	biological_process	1	287	8	12622	0.0131777	0.0302431	5.49739	comp128490_c2_seq2
GO:0006584	catecholamine metabolic process	biological_process	1	287	8	12622	0.0131777	0.0302431	5.49739	comp128759_c0_seq8
GO:0004198	calcium-dependent cysteine-type endopeptidase activity	molecular_function	1	287	8	12622	0.0131777	0.0302431	5.49739	comp129772_c1_seq1
GO:0006672	ceramide metabolic process	biological_process	1	287	8	12622	0.0131777	0.0302431	5.49739	comp130456_c0_seq2
GO:0007313	maternal specification of dorsal/ventral axis, oocyte, soma encoded	biological_process	1	287	8	12622	0.0131777	0.0302431	5.49739	comp131416_c0_seq1
GO:0044233	ER-mitochondrion membrane contact site	cellular_component	1	287	8	12622	0.0131777	0.0302431	5.49739	comp131818_c0_seq5
GO:0031005	filamin binding	molecular_function	1	287	8	12622	0.0131777	0.0302431	5.49739	comp132941_c0_seq2
GO:0008480	sarcosine dehydrogenase activity	molecular_function	1	287	8	12622	0.0131777	0.0302431	5.49739	comp133317_c0_seq12
GO:0017056	structural constituent of nuclear pore	molecular_function	1	287	8	12622	0.0131777	0.0302431	5.49739	comp135515_c0_seq4
GO:0001102	RNA polymerase II activating transcription factor binding	molecular_function	1	287	8	12622	0.0131777	0.0302431	5.49739	comp53390_c0_seq1
GO:0042078	germ-line stem cell division	biological_process	1	287	8	12622	0.0131777	0.0302431	5.49739	comp53390_c0_seq1
GO:0005041	low-density lipoprotein receptor activity	molecular_function	1	287	8	12622	0.0131777	0.0302431	5.49739	comp56086_c0_seq1
GO:0001709	cell fate determination	biological_process	2	287	23	12622	0.0147143	0.0336406	3.82427	comp112662_c0_seq1; comp118941_c1_seq2
GO:0030900	forebrain development	biological_process	2	287	23	12622	0.0147143	0.0336406	3.82427	comp116818_c0_seq1; comp128928_c0_seq5
GO:0016485	protein processing	biological_process	3	287	43	12622	0.0161109	0.0357058	3.06831	comp117829_c0_seq1; comp131416_c0_seq1; comp131814_c0_seq5
GO:0006869	lipid transport	biological_process	3	287	43	12622	0.0161109	0.0357058	3.06831	comp118141_c1_seq14; comp121182_c0_seq1; comp127242_c0_seq1
GO:0007266	Rho protein signal transduction	biological_process	2	287	24	12622	0.0165389	0.0357058	3.66492	comp110231_c0_seq1; comp121557_c0_seq1
GO:0048589	developmental growth	biological_process	2	287	24	12622	0.0165389	0.0357058	3.66492	comp112662_c0_seq1; comp124673_c0_seq1
GO:0042632	cholesterol homeostasis	biological_process	2	287	24	12622	0.0165389	0.0357058	3.66492	comp114565_c0_seq1; comp39182_c0_seq1
GO:0030206	chondroitin sulfate biosynthetic process	biological_process	2	287	24	12622	0.0165389	0.0357058	3.66492	comp119994_c0_seq3; comp124673_c0_seq1
GO:0031418	L-ascorbic acid binding	molecular_function	2	287	24	12622	0.0165389	0.0357058	3.66492	comp122504_c0_seq1; comp122911_c0_seq3
GO:0007166	cell surface receptor signaling pathway	biological_process	5	287	90	12622	0.0166152	0.0357058	2.44328	comp111400_c0_seq1; comp121742_c1_seq1; comp129608_c0_seq1; comp130754_c0_seq4; comp131409_c0_seq1
GO:0050908	detection of light stimulus involved in visual perception	biological_process	1	287	9	12622	0.0166905	0.0357058	4.88657	comp100130_c0_seq1
GO:0045599	negative regulation of fat cell differentiation	biological_process	1	287	9	12622	0.0166905	0.0357058	4.88657	comp112662_c0_seq1
GO:0051569	regulation of histone H3-K4 methylation	biological_process	1	287	9	12622	0.0166905	0.0357058	4.88657	comp112662_c0_seq1
GO:0021670	lateral ventricle development	biological_process	1	287	9	12622	0.0166905	0.0357058	4.88657	comp116818_c0_seq1
GO:0007350	blastoderm segmentation	biological_process	1	287	9	12622	0.0166905	0.0357058	4.88657	comp118941_c1_seq2
GO:0050764	regulation of phagocytosis	biological_process	1	287	9	12622	0.0166905	0.0357058	4.88657	comp119876_c0_seq1
GO:0031629	synaptic vesicle fusion to presynaptic membrane	biological_process	1	287	9	12622	0.0166905	0.0357058	4.88657	comp120390_c0_seq1
GO:2000772	regulation of cellular senescence	biological_process	1	287	9	12622	0.0166905	0.0357058	4.88657	comp121200_c0_seq4
GO:0004185	serine-type carboxypeptidase activity	molecular_function	1	287	9	12622	0.0166905	0.0357058	4.88657	comp123201_c0_seq4
GO:0016504	peptidase activator activity	molecular_function	1	287	9	12622	0.0166905	0.0357058	4.88657	comp123878_c1_seq3
GO:0010496	intercellular transport	biological_process	1	287	9	12622	0.0166905	0.0357058	4.88657	comp124099_c0_seq1
GO:0007171	activation of transmembrane receptor protein tyrosine kinase activity	biological_process	1	287	9	12622	0.0166905	0.0357058	4.88657	comp124889_c0_seq1
GO:0030297	transmembrane receptor protein tyrosine kinase activator activity	molecular_function	1	287	9	12622	0.0166905	0.0357058	4.88657	comp124889_c0_seq1
GO:0006643	membrane lipid metabolic process	biological_process	1	287	9	12622	0.0166905	0.0357058	4.88657	comp127309_c0_seq1
GO:0004356	glutamate-ammonia ligase activity	molecular_function	1	287	9	12622	0.0166905	0.0357058	4.88657	comp127394_c0_seq2
GO:0006542	glutamine biosynthetic process	biological_process	1	287	9	12622	0.0166905	0.0357058	4.88657	comp127394_c0_seq2
GO:0004559	alpha-mannosidase activity	molecular_function	1	287	9	12622	0.0166905	0.0357058	4.88657	comp128383_c0_seq1
GO:0006044	N-acetylglucosamine metabolic process	biological_process	1	287	9	12622	0.0166905	0.0357058	4.88657	comp129485_c0_seq1
GO:0042335	cuticle development	biological_process	1	287	9	12622	0.0166905	0.0357058	4.88657	comp129772_c1_seq1
GO:0016212	kynurenine-oxoglutarate transaminase activity	molecular_function	1	287	9	12622	0.0166905	0.0357058	4.88657	comp130351_c0_seq3
GO:0033512	L-lysine catabolic process to acetyl-CoA via saccharopine	biological_process	1	287	9	12622	0.0166905	0.0357058	4.88657	comp130351_c0_seq3
GO:0015908	fatty acid transport	biological_process	1	287	9	12622	0.0166905	0.0357058	4.88657	comp131818_c0_seq5
GO:0031985	Golgi cisterna	cellular_component	1	287	9	12622	0.0166905	0.0357058	4.88657	comp132652_c0_seq1
GO:0034968	histone lysine methylation	biological_process	1	287	9	12622	0.0166905	0.0357058	4.88657	comp132671_c1_seq1
GO:0071546	pi-body	cellular_component	1	287	9	12622	0.0166905	0.0357058	4.88657	comp134851_c0_seq5
GO:0001105	RNA polymerase II transcription coactivator activity	molecular_function	1	287	9	12622	0.0166905	0.0357058	4.88657	comp53390_c0_seq1
GO:0045595	regulation of cell differentiation	biological_process	1	287	9	12622	0.0166905	0.0357058	4.88657	comp53390_c0_seq1
GO:0002062	chondrocyte differentiation	biological_process	1	287	9	12622	0.0166905	0.0357058	4.88657	comp91391_c0_seq1
GO:0003964	RNA-directed DNA polymerase activity	molecular_function	17	287	457	12622	0.0168741	0.0360341	1.63598	comp121834_c0_seq1; comp126116_c1_seq19; comp130571_c0_seq21; comp134180_c0_seq1; comp134786_c0_seq4; comp134928_c0_seq3; comp134940_c1_seq2; comp135153_c0_seq1; comp135335_c0_seq1; comp135415_c0_seq1; comp135558_c0_seq3; comp135575_c0_seq1; comp135695_c1_seq1; comp135709_c1_seq3; comp135718_c0_seq1; comp135739_c0_seq1; comp135760_c1_seq1
GO:0009791	post-embryonic development	biological_process	3	287	44	12622	0.0174134	0.0370538	2.99857	comp112662_c0_seq1; comp124673_c0_seq1; comp127397_c0_seq1
GO:0008203	cholesterol metabolic process	biological_process	3	287	44	12622	0.0174134	0.0370538	2.99857	comp114565_c0_seq1; comp127242_c0_seq1; comp134219_c0_seq1
GO:0000045	autophagosome assembly	biological_process	2	287	25	12622	0.0184844	0.039263	3.51833	comp116261_c0_seq1; comp119631_c0_seq1
GO:0008045	motor neuron axon guidance	biological_process	3	287	45	12622	0.0187798	0.0398198	2.93194	comp118941_c1_seq2; comp119876_c0_seq1; comp132941_c0_seq2
GO:0020037	heme binding	molecular_function	6	287	119	12622	0.0188775	0.0399562	2.21743	comp107790_c0_seq1; comp109070_c1_seq1; comp120623_c0_seq8; comp126579_c0_seq1; comp127080_c0_seq1; comp135524_c0_seq1
GO:0045177	apical part of cell	cellular_component	4	287	68	12622	0.0190956	0.0402755	2.58701	comp105885_c0_seq3; comp128119_c0_seq18; comp128928_c0_seq5; comp129898_c0_seq1
GO:0001525	angiogenesis	biological_process	4	287	68	12622	0.0190956	0.0402755	2.58701	comp118141_c1_seq14; comp119994_c0_seq3; comp121182_c0_seq1; comp129925_c1_seq5
GO:0030707	ovarian follicle cell development	biological_process	3	287	46	12622	0.0202108	0.0415924	2.8682	comp107790_c0_seq1; comp120623_c0_seq8; comp53390_c0_seq1
GO:0034613	cellular protein localization	biological_process	2	287	26	12622	0.0205515	0.0415924	3.38301	comp105209_c1_seq1; comp116202_c0_seq1
GO:0004568	chitinase activity	molecular_function	2	287	26	12622	0.0205515	0.0415924	3.38301	comp126021_c0_seq5; comp54356_c0_seq1
GO:0008353	RNA polymerase II carboxy-terminal domain kinase activity	molecular_function	1	287	10	12622	0.0205532	0.0415924	4.39791	comp104073_c0_seq1
GO:0015721	bile acid and bile salt transport	biological_process	1	287	10	12622	0.0205532	0.0415924	4.39791	comp108380_c0_seq2
GO:0004089	carbonate dehydratase activity	molecular_function	1	287	10	12622	0.0205532	0.0415924	4.39791	comp110696_c0_seq1
GO:0007377	germ-band extension	biological_process	1	287	10	12622	0.0205532	0.0415924	4.39791	comp118941_c1_seq2
GO:0015804	neutral amino acid transport	biological_process	1	287	10	12622	0.0205532	0.0415924	4.39791	comp119983_c0_seq2
GO:0051496	positive regulation of stress fiber assembly	biological_process	1	287	10	12622	0.0205532	0.0415924	4.39791	comp121024_c0_seq2
GO:0004656	procollagen-proline 4-dioxygenase activity	molecular_function	1	287	10	12622	0.0205532	0.0415924	4.39791	comp122911_c0_seq3
GO:0007628	adult walking behavior	biological_process	1	287	10	12622	0.0205532	0.0415924	4.39791	comp123066_c0_seq1
GO:0071320	cellular response to cAMP	biological_process	1	287	10	12622	0.0205532	0.0415924	4.39791	comp123086_c0_seq1
GO:0009117	nucleotide metabolic process	biological_process	1	287	10	12622	0.0205532	0.0415924	4.39791	comp127276_c0_seq1
GO:0009395	phospholipid catabolic process	biological_process	1	287	10	12622	0.0205532	0.0415924	4.39791	comp127397_c0_seq1
GO:0000784	nuclear chromosome, telomeric region	cellular_component	1	287	10	12622	0.0205532	0.0415924	4.39791	comp127897_c0_seq1
GO:0016202	regulation of striated muscle tissue development	biological_process	1	287	10	12622	0.0205532	0.0415924	4.39791	comp128119_c0_seq18
GO:0046666	retinal cell programmed cell death	biological_process	1	287	10	12622	0.0205532	0.0415924	4.39791	comp128119_c0_seq18
GO:0006013	mannose metabolic process	biological_process	1	287	10	12622	0.0205532	0.0415924	4.39791	comp128383_c0_seq1
GO:0006790	sulfur compound metabolic process	biological_process	1	287	10	12622	0.0205532	0.0415924	4.39791	comp129485_c0_seq1
GO:0034110	regulation of homotypic cell-cell adhesion	biological_process	1	287	10	12622	0.0205532	0.0415924	4.39791	comp132941_c0_seq2
GO:0034116	positive regulation of heterotypic cell-cell adhesion	biological_process	1	287	10	12622	0.0205532	0.0415924	4.39791	comp132941_c0_seq2
GO:0034399	nuclear periphery	cellular_component	1	287	10	12622	0.0205532	0.0415924	4.39791	comp135515_c0_seq4
GO:0006826	iron ion transport	biological_process	1	287	10	12622	0.0205532	0.0415924	4.39791	comp39440_c0_seq1
GO:2000134	negative regulation of G1/S transition of mitotic cell cycle	biological_process	1	287	10	12622	0.0205532	0.0415924	4.39791	comp53390_c0_seq1
GO:0051301	cell division	biological_process	9	287	209	12622	0.021295	0.043021	1.89384	comp119387_c0_seq1; comp121200_c0_seq4; comp123313_c0_seq2; comp124361_c0_seq2; comp125964_c0_seq1; comp127235_c0_seq1; comp127379_c0_seq1; comp128759_c0_seq8; comp98507_c0_seq1
GO:0015629	actin cytoskeleton	cellular_component	4	287	70	12622	0.0213811	0.0431222	2.51309	comp115013_c1_seq5; comp116261_c0_seq1; comp119631_c0_seq1; comp129772_c1_seq1
GO:0007346	regulation of mitotic cell cycle	biological_process	3	287	48	12622	0.0232697	0.0468523	2.74869	comp110231_c0_seq1; comp121200_c0_seq4; comp121557_c0_seq1
GO:0016028	rhabdomere	cellular_component	1	287	11	12622	0.024748	0.0481301	3.9981	comp100130_c0_seq1
GO:0030522	intracellular receptor signaling pathway	biological_process	1	287	11	12622	0.024748	0.0481301	3.9981	comp106051_c0_seq1
GO:0042472	inner ear morphogenesis	biological_process	1	287	11	12622	0.024748	0.0481301	3.9981	comp112662_c0_seq1
GO:0005915	zonula adherens	cellular_component	1	287	11	12622	0.024748	0.0481301	3.9981	comp115013_c1_seq5
GO:0030720	oocyte localization involved in germarium-derived egg chamber formation	biological_process	1	287	11	12622	0.024748	0.0481301	3.9981	comp115013_c1_seq5
GO:0009898	cytoplasmic side of plasma membrane	cellular_component	1	287	11	12622	0.024748	0.0481301	3.9981	comp119876_c0_seq1
GO:0005796	Golgi lumen	cellular_component	1	287	11	12622	0.024748	0.0481301	3.9981	comp119994_c0_seq3
GO:0032801	receptor catabolic process	biological_process	1	287	11	12622	0.024748	0.0481301	3.9981	comp122809_c0_seq1
GO:0002027	regulation of heart rate	biological_process	1	287	11	12622	0.024748	0.0481301	3.9981	comp123086_c0_seq1
GO:0007440	foregut morphogenesis	biological_process	1	287	11	12622	0.024748	0.0481301	3.9981	comp124099_c0_seq1
GO:0043395	heparan sulfate proteoglycan binding	molecular_function	1	287	11	12622	0.024748	0.0481301	3.9981	comp124889_c0_seq1
GO:0007131	reciprocal meiotic recombination	biological_process	1	287	11	12622	0.024748	0.0481301	3.9981	comp125174_c0_seq1
GO:0050662	coenzyme binding	molecular_function	1	287	11	12622	0.024748	0.0481301	3.9981	comp126312_c0_seq1
GO:0046933	proton-transporting ATP synthase activity, rotational mechanism	molecular_function	1	287	11	12622	0.024748	0.0481301	3.9981	comp127915_c0_seq3
GO:0001676	long-chain fatty acid metabolic process	biological_process	1	287	11	12622	0.024748	0.0481301	3.9981	comp131818_c0_seq5
GO:0008610	lipid biosynthetic process	biological_process	1	287	11	12622	0.024748	0.0481301	3.9981	comp131818_c0_seq5
GO:0042051	compound eye photoreceptor development	biological_process	1	287	11	12622	0.024748	0.0481301	3.9981	comp132941_c0_seq2
GO:2000331	regulation of terminal button organization	biological_process	1	287	11	12622	0.024748	0.0481301	3.9981	comp132941_c0_seq2
GO:0044062	regulation of excretion	biological_process	1	287	11	12622	0.024748	0.0481301	3.9981	comp134729_c0_seq1
GO:0061512	protein localization to cilium	biological_process	1	287	11	12622	0.024748	0.0481301	3.9981	comp39182_c0_seq1
GO:0000070	mitotic sister chromatid segregation	biological_process	1	287	11	12622	0.024748	0.0481301	3.9981	comp98507_c0_seq1
GO:0007391	dorsal closure	biological_process	3	287	49	12622	0.0248988	0.0482667	2.6926	comp109070_c1_seq1; comp128490_c2_seq2; comp53390_c0_seq1
GO:0006898	receptor-mediated endocytosis	biological_process	3	287	49	12622	0.0248988	0.0482667	2.6926	comp128928_c0_seq5; comp132489_c0_seq1; comp56086_c0_seq1
GO:0005783	endoplasmic reticulum	cellular_component	14	287	376	12622	0.0251562	0.0486869	1.63752	comp113433_c0_seq1; comp114062_c0_seq1; comp114565_c0_seq1; comp114682_c0_seq2; comp118141_c1_seq14; comp120861_c0_seq1; comp121182_c0_seq1; comp121460_c0_seq1; comp125544_c0_seq1; comp125948_c0_seq1; comp127309_c0_seq1; comp128928_c0_seq5; comp130800_c0_seq3; comp134468_c3_seq1
GO:0003676	nucleic acid binding	molecular_function	16	287	447	12622	0.0268002	0.0517849	1.5742	comp114608_c0_seq1; comp121834_c0_seq1; comp126116_c1_seq19; comp127673_c0_seq2; comp130571_c0_seq21; comp132166_c0_seq3; comp134598_c0_seq1; comp134786_c0_seq4; comp134940_c1_seq2; comp135153_c0_seq1; comp135415_c0_seq1; comp135558_c0_seq3; comp135575_c0_seq1; comp135633_c0_seq1; comp135695_c1_seq1; comp135760_c1_seq1
GO:0007254	JNK cascade	biological_process	2	287	29	12622	0.0274833	0.0530194	3.03304	comp128490_c2_seq2; comp134729_c0_seq1
GO:0015075	ion transmembrane transporter activity	molecular_function	1	287	12	12622	0.0292581	0.0541325	3.66492	comp100130_c0_seq1
GO:0051480	cytosolic calcium ion homeostasis	biological_process	1	287	12	12622	0.0292581	0.0541325	3.66492	comp100130_c0_seq1
GO:0005771	multivesicular body	cellular_component	1	287	12	12622	0.0292581	0.0541325	3.66492	comp104643_c0_seq1
GO:0072562	blood microparticle	cellular_component	1	287	12	12622	0.0292581	0.0541325	3.66492	comp105162_c0_seq1
GO:0030168	platelet activation	biological_process	1	287	12	12622	0.0292581	0.0541325	3.66492	comp105209_c1_seq1
GO:0008206	bile acid metabolic process	biological_process	1	287	12	12622	0.0292581	0.0541325	3.66492	comp108380_c0_seq2
GO:0009967	positive regulation of signal transduction	biological_process	1	287	12	12622	0.0292581	0.0541325	3.66492	comp112662_c0_seq1
GO:2000114	regulation of establishment of cell polarity	biological_process	1	287	12	12622	0.0292581	0.0541325	3.66492	comp112662_c0_seq1
GO:0030901	midbrain development	biological_process	1	287	12	12622	0.0292581	0.0541325	3.66492	comp116818_c0_seq1
GO:0045666	positive regulation of neuron differentiation	biological_process	1	287	12	12622	0.0292581	0.0541325	3.66492	comp119082_c0_seq1
GO:0005682	U5 snRNP	cellular_component	1	287	12	12622	0.0292581	0.0541325	3.66492	comp119852_c0_seq5
GO:0031589	cell-substrate adhesion	biological_process	1	287	12	12622	0.0292581	0.0541325	3.66492	comp121024_c0_seq2
GO:0042552	myelination	biological_process	1	287	12	12622	0.0292581	0.0541325	3.66492	comp123066_c0_seq1
GO:0060395	SMAD protein signal transduction	biological_process	1	287	12	12622	0.0292581	0.0541325	3.66492	comp123066_c0_seq1
GO:0030552	cAMP binding	molecular_function	1	287	12	12622	0.0292581	0.0541325	3.66492	comp123086_c0_seq1
GO:0055086	nucleobase-containing small molecule metabolic process	biological_process	1	287	12	12622	0.0292581	0.0541325	3.66492	comp125653_c0_seq7
GO:0046034	ATP metabolic process	biological_process	1	287	12	12622	0.0292581	0.0541325	3.66492	comp127276_c0_seq1
GO:0000118	histone deacetylase complex	cellular_component	1	287	12	12622	0.0292581	0.0541325	3.66492	comp127897_c0_seq1
GO:0051438	regulation of ubiquitin-protein transferase activity	biological_process	1	287	12	12622	0.0292581	0.0541325	3.66492	comp131087_c0_seq1
GO:0007310	oocyte dorsal/ventral axis specification	biological_process	1	287	12	12622	0.0292581	0.0541325	3.66492	comp131416_c0_seq1
GO:0019432	triglyceride biosynthetic process	biological_process	1	287	12	12622	0.0292581	0.0541325	3.66492	comp131818_c0_seq5
GO:0016200	synaptic target attraction	biological_process	1	287	12	12622	0.0292581	0.0541325	3.66492	comp132941_c0_seq2
GO:0048499	synaptic vesicle membrane organization	biological_process	1	287	12	12622	0.0292581	0.0541325	3.66492	comp132941_c0_seq2
GO:0050750	low-density lipoprotein particle receptor binding	molecular_function	1	287	12	12622	0.0292581	0.0541325	3.66492	comp56086_c0_seq1
GO:0005109	frizzled binding	molecular_function	1	287	12	12622	0.0292581	0.0541325	3.66492	comp91391_c0_seq1
GO:0008299	isoprenoid biosynthetic process	biological_process	1	287	12	12622	0.0292581	0.0541325	3.66492	comp99579_c0_seq1
GO:0010008	endosome membrane	cellular_component	4	287	76	12622	0.0292804	0.0541325	2.31469	comp104643_c0_seq1; comp105209_c1_seq1; comp116202_c0_seq1; comp39182_c0_seq1
GO:0005622	intracellular	cellular_component	10	287	252	12622	0.0293736	0.0542212	1.7452	comp100130_c0_seq1; comp113433_c0_seq1; comp114682_c0_seq2; comp117864_c0_seq1; comp121287_c0_seq1; comp124765_c0_seq2; comp126672_c0_seq1; comp129772_c1_seq1; comp134729_c0_seq1; comp83381_c0_seq1
GO:0030176	integral component of endoplasmic reticulum membrane	cellular_component	2	287	30	12622	0.0300369	0.0551904	2.93194	comp110935_c0_seq5; comp124924_c0_seq1
GO:0007293	germarium-derived egg chamber formation	biological_process	2	287	30	12622	0.0300369	0.0551904	2.93194	comp115013_c1_seq5; comp124099_c0_seq1
GO:0016079	synaptic vesicle exocytosis	biological_process	2	287	30	12622	0.0300369	0.0551904	2.93194	comp120390_c0_seq1; comp131373_c0_seq1
GO:0005215	transporter activity	molecular_function	4	287	77	12622	0.0307536	0.0564209	2.28463	comp113433_c0_seq1; comp114682_c0_seq2; comp125903_c0_seq5; comp126672_c0_seq1
GO:0001764	neuron migration	biological_process	3	287	53	12622	0.0320916	0.0586957	2.48938	comp112662_c0_seq1; comp119082_c0_seq1; comp119876_c0_seq1
GO:0007218	neuropeptide signaling pathway	biological_process	3	287	53	12622	0.0320916	0.0586957	2.48938	comp127520_c0_seq2; comp130758_c1_seq1; comp131409_c0_seq1
GO:0000226	microtubule cytoskeleton organization	biological_process	2	287	31	12622	0.0327111	0.0597376	2.83736	comp116261_c0_seq1; comp119631_c0_seq1
GO:0048102	autophagic cell death	biological_process	1	287	13	12622	0.0340669	0.0604625	3.38301	comp104643_c0_seq1
GO:0000987	core promoter proximal region sequence-specific DNA binding	molecular_function	1	287	13	12622	0.0340669	0.0604625	3.38301	comp112662_c0_seq1
GO:0043473	pigmentation	biological_process	1	287	13	12622	0.0340669	0.0604625	3.38301	comp116202_c0_seq1
GO:0007631	feeding behavior	biological_process	1	287	13	12622	0.0340669	0.0604625	3.38301	comp120722_c0_seq1
GO:0030658	transport vesicle membrane	cellular_component	1	287	13	12622	0.0340669	0.0604625	3.38301	comp121742_c1_seq1
GO:0005267	potassium channel activity	molecular_function	1	287	13	12622	0.0340669	0.0604625	3.38301	comp122176_c1_seq1
GO:0008076	voltage-gated potassium channel complex	cellular_component	1	287	13	12622	0.0340669	0.0604625	3.38301	comp122176_c1_seq1
GO:0016702	oxidoreductase activity, acting on single donors with incorporation of molecular oxygen, incorporation of two atoms of oxygen	molecular_function	1	287	13	12622	0.0340669	0.0604625	3.38301	comp122911_c0_seq3
GO:0008277	regulation of G-protein coupled receptor protein signaling pathway	biological_process	1	287	13	12622	0.0340669	0.0604625	3.38301	comp123086_c0_seq1
GO:0071222	cellular response to lipopolysaccharide	biological_process	1	287	13	12622	0.0340669	0.0604625	3.38301	comp123086_c0_seq1
GO:0060213	positive regulation of nuclear-transcribed mRNA poly(A) tail shortening	biological_process	1	287	13	12622	0.0340669	0.0604625	3.38301	comp124139_c0_seq1
GO:0048704	embryonic skeletal system morphogenesis	biological_process	1	287	13	12622	0.0340669	0.0604625	3.38301	comp124673_c0_seq1
GO:0042149	cellular response to glucose starvation	biological_process	1	287	13	12622	0.0340669	0.0604625	3.38301	comp125653_c0_seq7
GO:0005892	acetylcholine-gated channel complex	cellular_component	1	287	13	12622	0.0340669	0.0604625	3.38301	comp126499_c0_seq9
GO:0007271	synaptic transmission, cholinergic	biological_process	1	287	13	12622	0.0340669	0.0604625	3.38301	comp126499_c0_seq9
GO:0010043	response to zinc ion	biological_process	1	287	13	12622	0.0340669	0.0604625	3.38301	comp129926_c0_seq1
GO:0006536	glutamate metabolic process	biological_process	1	287	13	12622	0.0340669	0.0604625	3.38301	comp130351_c0_seq3
GO:0004653	polypeptide N-acetylgalactosaminyltransferase activity	molecular_function	1	287	13	12622	0.0340669	0.0604625	3.38301	comp132652_c0_seq1
GO:0050803	regulation of synapse structure or activity	biological_process	1	287	13	12622	0.0340669	0.0604625	3.38301	comp53390_c0_seq1
GO:0005509	calcium ion binding	molecular_function	17	287	496	12622	0.0344898	0.0611225	1.50735	comp110378_c0_seq1; comp117451_c0_seq1; comp117536_c0_seq1; comp124580_c0_seq1; comp124889_c0_seq1; comp124977_c1_seq1; comp125266_c0_seq6; comp127397_c0_seq1; comp128928_c0_seq5; comp129772_c1_seq1; comp130288_c0_seq2; comp130754_c0_seq4; comp131373_c0_seq1; comp132489_c0_seq1; comp39182_c0_seq1; comp56086_c0_seq1; comp78735_c0_seq1
GO:0031526	brush border membrane	cellular_component	2	287	32	12622	0.0355053	0.0627365	2.74869	comp113195_c0_seq1; comp128928_c0_seq5
GO:0008039	synaptic target recognition	biological_process	2	287	32	12622	0.0355053	0.0627365	2.74869	comp117829_c0_seq1; comp132941_c0_seq2
GO:0016324	apical plasma membrane	cellular_component	6	287	136	12622	0.0357042	0.0629951	1.94025	comp113195_c0_seq1; comp115100_c0_seq2; comp119994_c0_seq3; comp123086_c0_seq1; comp124099_c0_seq1; comp128928_c0_seq5
GO:0005578	proteinaceous extracellular matrix	cellular_component	5	287	108	12622	0.0365869	0.0644575	2.03607	comp118653_c0_seq1; comp127080_c0_seq1; comp131416_c0_seq1; comp132941_c0_seq2; comp91391_c0_seq1
GO:0006814	sodium ion transport	biological_process	4	287	81	12622	0.0371077	0.065279	2.17181	comp119983_c0_seq2; comp125903_c0_seq5; comp127154_c0_seq2; comp130288_c0_seq2
GO:0051017	actin filament bundle assembly	biological_process	2	287	33	12622	0.0384185	0.0671133	2.6654	comp126555_c0_seq1; comp128490_c2_seq2
GO:0019722	calcium-mediated signaling	biological_process	1	287	14	12622	0.0391588	0.0671133	3.14136	comp100130_c0_seq1
GO:0000979	RNA polymerase II core promoter sequence-specific DNA binding	molecular_function	1	287	14	12622	0.0391588	0.0671133	3.14136	comp112662_c0_seq1
GO:0001158	enhancer sequence-specific DNA binding	molecular_function	1	287	14	12622	0.0391588	0.0671133	3.14136	comp112662_c0_seq1
GO:0002119	nematode larval development	biological_process	1	287	14	12622	0.0391588	0.0671133	3.14136	comp119876_c0_seq1
GO:0006661	phosphatidylinositol biosynthetic process	biological_process	1	287	14	12622	0.0391588	0.0671133	3.14136	comp121028_c0_seq2
GO:0007154	cell communication	biological_process	1	287	14	12622	0.0391588	0.0671133	3.14136	comp124099_c0_seq1
GO:0051216	cartilage development	biological_process	1	287	14	12622	0.0391588	0.0671133	3.14136	comp124673_c0_seq1
GO:0043434	response to peptide hormone	biological_process	1	287	14	12622	0.0391588	0.0671133	3.14136	comp127397_c0_seq1
GO:0042059	negative regulation of epidermal growth factor receptor signaling pathway	biological_process	1	287	14	12622	0.0391588	0.0671133	3.14136	comp128490_c2_seq2
GO:0006493	protein O-linked glycosylation	biological_process	1	287	14	12622	0.0391588	0.0671133	3.14136	comp132652_c0_seq1
GO:0048790	maintenance of presynaptic active zone structure	biological_process	1	287	14	12622	0.0391588	0.0671133	3.14136	comp132941_c0_seq2
GO:0032836	glomerular basement membrane development	biological_process	1	287	14	12622	0.0391588	0.0671133	3.14136	comp134729_c0_seq1
GO:0043046	DNA methylation involved in gamete generation	biological_process	1	287	14	12622	0.0391588	0.0671133	3.14136	comp134851_c0_seq5
GO:0043186	P granule	cellular_component	1	287	14	12622	0.0391588	0.0671133	3.14136	comp134851_c0_seq5
GO:1990090	cellular response to nerve growth factor stimulus	biological_process	1	287	14	12622	0.0391588	0.0671133	3.14136	comp39182_c0_seq1
GO:0045600	positive regulation of fat cell differentiation	biological_process	1	287	14	12622	0.0391588	0.0671133	3.14136	comp91391_c0_seq1
GO:0008158	hedgehog receptor activity	molecular_function	1	287	14	12622	0.0391588	0.0671133	3.14136	comp98366_c0_seq1
GO:0007605	sensory perception of sound	biological_process	3	287	57	12622	0.0403817	0.0689136	2.31469	comp100130_c0_seq1; comp120861_c0_seq1; comp123066_c0_seq1
GO:0031902	late endosome membrane	cellular_component	3	287	57	12622	0.0403817	0.0689136	2.31469	comp105209_c1_seq1; comp116202_c0_seq1; comp121742_c1_seq1
GO:0030170	pyridoxal phosphate binding	molecular_function	3	287	57	12622	0.0403817	0.0689136	2.31469	comp116880_c0_seq1; comp130351_c0_seq3; comp130456_c0_seq2
GO:0005778	peroxisomal membrane	cellular_component	2	287	34	12622	0.0414497	0.0705352	2.58701	comp122509_c1_seq1; comp131818_c0_seq5
GO:0008063	Toll signaling pathway	biological_process	2	287	34	12622	0.0414497	0.0705352	2.58701	comp131416_c0_seq1; comp131814_c0_seq5
GO:0004712	protein serine/threonine/tyrosine kinase activity	molecular_function	1	287	15	12622	0.0445183	0.0738978	2.93194	comp111585_c0_seq1
GO:0003007	heart morphogenesis	biological_process	1	287	15	12622	0.0445183	0.0738978	2.93194	comp118941_c1_seq2
GO:0004521	endoribonuclease activity	molecular_function	1	287	15	12622	0.0445183	0.0738978	2.93194	comp119062_c0_seq1
GO:0050731	positive regulation of peptidyl-tyrosine phosphorylation	biological_process	1	287	15	12622	0.0445183	0.0738978	2.93194	comp119994_c0_seq3
GO:0015129	lactate transmembrane transporter activity	molecular_function	1	287	15	12622	0.0445183	0.0738978	2.93194	comp120718_c0_seq2
GO:0016331	morphogenesis of embryonic epithelium	biological_process	1	287	15	12622	0.0445183	0.0738978	2.93194	comp124099_c0_seq1
GO:0010494	cytoplasmic stress granule	cellular_component	1	287	15	12622	0.0445183	0.0738978	2.93194	comp124139_c0_seq1
GO:0031033	myosin filament organization	biological_process	1	287	15	12622	0.0445183	0.0738978	2.93194	comp124626_c0_seq13
GO:0004889	acetylcholine-activated cation-selective channel activity	molecular_function	1	287	15	12622	0.0445183	0.0738978	2.93194	comp126499_c0_seq9
GO:0004181	metallocarboxypeptidase activity	molecular_function	1	287	15	12622	0.0445183	0.0738978	2.93194	comp128267_c0_seq6
GO:0006103	2-oxoglutarate metabolic process	biological_process	1	287	15	12622	0.0445183	0.0738978	2.93194	comp130351_c0_seq3
GO:0004467	long-chain fatty acid-CoA ligase activity	molecular_function	1	287	15	12622	0.0445183	0.0738978	2.93194	comp131818_c0_seq5
GO:0040017	positive regulation of locomotion	biological_process	1	287	15	12622	0.0445183	0.0738978	2.93194	comp132941_c0_seq2
GO:0007588	excretion	biological_process	1	287	15	12622	0.0445183	0.0738978	2.93194	comp134729_c0_seq1
GO:0072015	glomerular visceral epithelial cell development	biological_process	1	287	15	12622	0.0445183	0.0738978	2.93194	comp134729_c0_seq1
GO:0034587	piRNA metabolic process	biological_process	1	287	15	12622	0.0445183	0.0738978	2.93194	comp134851_c0_seq5
GO:0030672	synaptic vesicle membrane	cellular_component	2	287	35	12622	0.0445977	0.0738978	2.51309	comp110021_c0_seq1; comp131373_c0_seq1
GO:0003705	transcription factor activity, RNA polymerase II distal enhancer sequence-specific binding	molecular_function	2	287	35	12622	0.0445977	0.0738978	2.51309	comp118941_c1_seq2; comp53390_c0_seq1
GO:0043202	lysosomal lumen	cellular_component	2	287	35	12622	0.0445977	0.0738978	2.51309	comp119994_c0_seq3; comp122809_c0_seq1
GO:0008307	structural constituent of muscle	molecular_function	2	287	36	12622	0.0478612	0.0790865	2.44328	comp124626_c0_seq13; comp126784_c0_seq4
GO:0009950	dorsal/ventral axis specification	biological_process	2	287	36	12622	0.0478612	0.0790865	2.44328	comp131416_c0_seq1; comp131814_c0_seq5
GO:0006979	response to oxidative stress	biological_process	4	287	87	12622	0.0480491	0.0792876	2.02203	comp107790_c0_seq1; comp120623_c0_seq8; comp126579_c0_seq1; comp127080_c0_seq1
GO:0000139	Golgi membrane	cellular_component	11	287	307	12622	0.0482624	0.0795301	1.5758	comp113154_c0_seq1; comp116261_c0_seq1; comp117829_c0_seq1; comp119631_c0_seq1; comp121028_c0_seq2; comp123343_c0_seq2; comp124673_c0_seq1; comp126566_c1_seq2; comp129052_c0_seq8; comp129485_c0_seq1; comp132652_c0_seq1
GO:0055085	transmembrane transport	biological_process	8	287	208	12622	0.0483432	0.0795538	1.6915	comp117970_c0_seq1; comp119530_c0_seq1; comp124099_c0_seq1; comp124863_c0_seq23; comp125140_c2_seq1; comp125903_c0_seq5; comp127520_c0_seq2; comp134303_c1_seq7
GO:0008061	chitin binding	molecular_function	3	287	61	12622	0.0497774	0.0799691	2.16291	comp106785_c0_seq1; comp126021_c0_seq5; comp54356_c0_seq1
GO:0034707	chloride channel complex	cellular_component	3	287	61	12622	0.0497774	0.0799691	2.16291	comp123346_c0_seq1; comp126831_c0_seq3; comp127520_c0_seq2
GO:0030218	erythrocyte differentiation	biological_process	1	287	16	12622	0.0501309	0.0799691	2.74869	comp112662_c0_seq1
GO:0005452	inorganic anion exchanger activity	molecular_function	1	287	16	12622	0.0501309	0.0799691	2.74869	comp113195_c0_seq1
GO:0003730	mRNA 3'-UTR binding	molecular_function	1	287	16	12622	0.0501309	0.0799691	2.74869	comp119603_c0_seq1
GO:0008144	drug binding	molecular_function	1	287	16	12622	0.0501309	0.0799691	2.74869	comp123086_c0_seq1
GO:0051117	ATPase binding	molecular_function	1	287	16	12622	0.0501309	0.0799691	2.74869	comp123086_c0_seq1
GO:0005243	gap junction channel activity	molecular_function	1	287	16	12622	0.0501309	0.0799691	2.74869	comp124099_c0_seq1
GO:0042048	olfactory behavior	biological_process	1	287	16	12622	0.0501309	0.0799691	2.74869	comp124099_c0_seq1
GO:0060361	flight	biological_process	1	287	16	12622	0.0501309	0.0799691	2.74869	comp124626_c0_seq13
GO:0071689	muscle thin filament assembly	biological_process	1	287	16	12622	0.0501309	0.0799691	2.74869	comp124626_c0_seq13
GO:0033037	polysaccharide localization	biological_process	1	287	16	12622	0.0501309	0.0799691	2.74869	comp124673_c0_seq1
GO:0050659	N-acetylgalactosamine 4-sulfate 6-O-sulfotransferase activity	molecular_function	1	287	16	12622	0.0501309	0.0799691	2.74869	comp124673_c0_seq1
GO:0000288	nuclear-transcribed mRNA catabolic process, deadenylation-dependent decay	biological_process	1	287	16	12622	0.0501309	0.0799691	2.74869	comp125429_c0_seq3
GO:0070491	repressing transcription factor binding	molecular_function	1	287	16	12622	0.0501309	0.0799691	2.74869	comp127897_c0_seq1
GO:0000132	establishment of mitotic spindle orientation	biological_process	1	287	16	12622	0.0501309	0.0799691	2.74869	comp129898_c0_seq1
GO:0005385	zinc ion transmembrane transporter activity	molecular_function	1	287	16	12622	0.0501309	0.0799691	2.74869	comp129926_c0_seq1
GO:0071577	zinc II ion transmembrane transport	biological_process	1	287	16	12622	0.0501309	0.0799691	2.74869	comp129926_c0_seq1
GO:0097190	apoptotic signaling pathway	biological_process	1	287	16	12622	0.0501309	0.0799691	2.74869	comp130456_c0_seq2
GO:0008188	neuropeptide receptor activity	molecular_function	1	287	16	12622	0.0501309	0.0799691	2.74869	comp131409_c0_seq1
GO:0031122	cytoplasmic microtubule organization	biological_process	1	287	16	12622	0.0501309	0.0799691	2.74869	comp132941_c0_seq2
GO:0036057	slit diaphragm	cellular_component	1	287	16	12622	0.0501309	0.0799691	2.74869	comp134729_c0_seq1
GO:0030718	germ-line stem cell population maintenance	biological_process	1	287	16	12622	0.0501309	0.0799691	2.74869	comp53390_c0_seq1
GO:0030145	manganese ion binding	molecular_function	2	287	37	12622	0.0512386	0.081411	2.37725	comp121200_c0_seq4; comp99579_c0_seq1
GO:0003746	translation elongation factor activity	molecular_function	2	287	37	12622	0.0512386	0.081411	2.37725	comp121287_c0_seq1; comp83381_c0_seq1
GO:0005507	copper ion binding	molecular_function	2	287	37	12622	0.0512386	0.081411	2.37725	comp131778_c0_seq1; comp132861_c0_seq2
GO:0005765	lysosomal membrane	cellular_component	6	287	148	12622	0.0522222	0.0828638	1.78294	comp105209_c1_seq1; comp116202_c0_seq1; comp117970_c0_seq1; comp121742_c1_seq1; comp125672_c2_seq1; comp128928_c0_seq5
GO:0042391	regulation of membrane potential	biological_process	3	287	62	12622	0.0522985	0.0828751	2.12802	comp104720_c0_seq1; comp127154_c0_seq2; comp127520_c0_seq2
GO:0009897	external side of plasma membrane	cellular_component	2	287	38	12622	0.0547285	0.0862694	2.31469	comp104643_c0_seq1; comp130754_c0_seq4
GO:0005912	adherens junction	cellular_component	2	287	38	12622	0.0547285	0.0862694	2.31469	comp115013_c1_seq5; comp128490_c2_seq2
GO:0035176	social behavior	biological_process	2	287	38	12622	0.0547285	0.0862694	2.31469	comp118545_c0_seq1; comp123130_c0_seq2
GO:0006414	translational elongation	biological_process	2	287	38	12622	0.0547285	0.0862694	2.31469	comp121287_c0_seq1; comp83381_c0_seq1
GO:0009408	response to heat	biological_process	3	287	63	12622	0.0548881	0.0864074	2.09424	comp114919_c0_seq1; comp127100_c1_seq4; comp127149_c1_seq1
GO:0007603	phototransduction, visible light	biological_process	1	287	17	12622	0.0559823	0.0865378	2.58701	comp100130_c0_seq1
GO:0008258	head involution	biological_process	1	287	17	12622	0.0559823	0.0865378	2.58701	comp109070_c1_seq1
GO:0008584	male gonad development	biological_process	1	287	17	12622	0.0559823	0.0865378	2.58701	comp112662_c0_seq1
GO:0050728	negative regulation of inflammatory response	biological_process	1	287	17	12622	0.0559823	0.0865378	2.58701	comp112662_c0_seq1
GO:0015347	sodium-independent organic anion transmembrane transporter activity	molecular_function	1	287	17	12622	0.0559823	0.0865378	2.58701	comp113195_c0_seq1
GO:0043252	sodium-independent organic anion transport	biological_process	1	287	17	12622	0.0559823	0.0865378	2.58701	comp113195_c0_seq1
GO:0004364	glutathione transferase activity	molecular_function	1	287	17	12622	0.0559823	0.0865378	2.58701	comp114807_c0_seq1
GO:0007016	cytoskeletal anchoring at plasma membrane	biological_process	1	287	17	12622	0.0559823	0.0865378	2.58701	comp115013_c1_seq5
GO:0006935	chemotaxis	biological_process	1	287	17	12622	0.0559823	0.0865378	2.58701	comp121557_c0_seq1
GO:0030324	lung development	biological_process	1	287	17	12622	0.0559823	0.0865378	2.58701	comp123086_c0_seq1
GO:0005921	gap junction	cellular_component	1	287	17	12622	0.0559823	0.0865378	2.58701	comp124099_c0_seq1
GO:0030674	protein binding, bridging	molecular_function	1	287	17	12622	0.0559823	0.0865378	2.58701	comp127897_c0_seq1
GO:0007311	maternal specification of dorsal/ventral axis, oocyte, germ-line encoded	biological_process	1	287	17	12622	0.0559823	0.0865378	2.58701	comp131814_c0_seq5
GO:0055038	recycling endosome membrane	cellular_component	1	287	17	12622	0.0559823	0.0865378	2.58701	comp39182_c0_seq1
GO:0030425	dendrite	cellular_component	9	287	248	12622	0.0572769	0.088425	1.59602	comp100130_c0_seq1; comp104643_c0_seq1; comp113433_c0_seq1; comp114682_c0_seq2; comp117451_c0_seq1; comp118141_c1_seq14; comp118545_c0_seq1; comp121182_c0_seq1; comp123130_c0_seq2
GO:0008270	zinc ion binding	molecular_function	26	287	864	12622	0.0574212	0.0885335	1.32344	comp110696_c0_seq1; comp112662_c0_seq1; comp114608_c0_seq1; comp114919_c0_seq1; comp116818_c0_seq1; comp118631_c0_seq4; comp121505_c0_seq1; comp121898_c0_seq4; comp122234_c0_seq3; comp122265_c0_seq1; comp122942_c0_seq1; comp125100_c0_seq4; comp125174_c0_seq1; comp125544_c0_seq1; comp126116_c1_seq19; comp126784_c0_seq4; comp127100_c1_seq4; comp127149_c1_seq1; comp128267_c0_seq6; comp128383_c0_seq1…
GO:0005770	late endosome	cellular_component	3	287	65	12622	0.0602717	0.0925712	2.0298	comp104643_c0_seq1; comp116202_c0_seq1; comp119992_c0_seq2
GO:0006260	DNA replication	biological_process	3	287	65	12622	0.0602717	0.0925712	2.0298	comp114919_c0_seq1; comp127100_c1_seq4; comp127149_c1_seq1
GO:0008017	microtubule binding	molecular_function	3	287	65	12622	0.0602717	0.0925712	2.0298	comp116261_c0_seq1; comp119631_c0_seq1; comp98507_c0_seq1
GO:0030165	PDZ domain binding	molecular_function	2	287	40	12622	0.0620388	0.0932829	2.19895	comp113195_c0_seq1; comp128119_c0_seq18
GO:0001228	transcriptional activator activity, RNA polymerase II transcription regulatory region sequence-specific binding	molecular_function	1	287	18	12622	0.0620588	0.0932829	2.44328	comp112662_c0_seq1
GO:0071356	cellular response to tumor necrosis factor	biological_process	1	287	18	12622	0.0620588	0.0932829	2.44328	comp112662_c0_seq1
GO:1901998	toxin transport	biological_process	1	287	18	12622	0.0620588	0.0932829	2.44328	comp119103_c0_seq1
GO:0006820	anion transport	biological_process	1	287	18	12622	0.0620588	0.0932829	2.44328	comp119530_c0_seq1
GO:0008138	protein tyrosine/serine/threonine phosphatase activity	molecular_function	1	287	18	12622	0.0620588	0.0932829	2.44328	comp121028_c0_seq2
GO:0005249	voltage-gated potassium channel activity	molecular_function	1	287	18	12622	0.0620588	0.0932829	2.44328	comp122176_c1_seq1
GO:0032982	myosin filament	cellular_component	1	287	18	12622	0.0620588	0.0932829	2.44328	comp124626_c0_seq13
GO:0042692	muscle cell differentiation	biological_process	1	287	18	12622	0.0620588	0.0932829	2.44328	comp124626_c0_seq13
GO:0047756	chondroitin 4-sulfotransferase activity	molecular_function	1	287	18	12622	0.0620588	0.0932829	2.44328	comp124673_c0_seq1
GO:0016934	extracellular-glycine-gated chloride channel activity	molecular_function	1	287	18	12622	0.0620588	0.0932829	2.44328	comp127520_c0_seq2
GO:0004035	alkaline phosphatase activity	molecular_function	1	287	18	12622	0.0620588	0.0932829	2.44328	comp129544_c0_seq1
GO:0071944	cell periphery	cellular_component	1	287	18	12622	0.0620588	0.0932829	2.44328	comp130754_c0_seq4
GO:0035418	protein localization to synapse	biological_process	1	287	18	12622	0.0620588	0.0932829	2.44328	comp134729_c0_seq1
GO:0006606	protein import into nucleus	biological_process	1	287	18	12622	0.0620588	0.0932829	2.44328	comp135515_c0_seq4
GO:0006879	cellular iron ion homeostasis	biological_process	1	287	18	12622	0.0620588	0.0932829	2.44328	comp39440_c0_seq1
GO:0007267	cell-cell signaling	biological_process	1	287	18	12622	0.0620588	0.0932829	2.44328	comp91391_c0_seq1
GO:0016740	transferase activity	molecular_function	3	287	66	12622	0.0630649	0.0946764	1.99905	comp108468_c0_seq2; comp110935_c0_seq5; comp124924_c0_seq1
GO:0070588	calcium ion transmembrane transport	biological_process	2	287	41	12622	0.0658555	0.0984954	2.14532	comp100130_c0_seq1; comp130288_c0_seq2
GO:0005198	structural molecule activity	molecular_function	2	287	41	12622	0.0658555	0.0984954	2.14532	comp115013_c1_seq5; comp123313_c0_seq2
GO:0007169	transmembrane receptor protein tyrosine kinase signaling pathway	biological_process	2	287	41	12622	0.0658555	0.0984954	2.14532	comp119994_c0_seq3; comp128490_c2_seq2
GO:0005874	microtubule	cellular_component	8	287	222	12622	0.0672419	0.0999757	1.58483	comp105885_c0_seq3; comp114326_c0_seq2; comp116261_c0_seq1; comp119631_c0_seq1; comp123313_c0_seq2; comp125948_c0_seq1; comp128759_c0_seq8; comp98507_c0_seq1
GO:0004970	ionotropic glutamate receptor activity	molecular_function	4	287	96	12622	0.0676839	0.0999757	1.83246	comp111485_c0_seq1; comp118545_c0_seq1; comp123130_c0_seq2; comp127002_c0_seq4
GO:0051897	positive regulation of protein kinase B signaling	biological_process	1	287	19	12622	0.0683473	0.0999757	2.31469	comp112662_c0_seq1
GO:0008378	galactosyltransferase activity	molecular_function	1	287	19	12622	0.0683473	0.0999757	2.31469	comp113154_c0_seq1
GO:0016327	apicolateral plasma membrane	cellular_component	1	287	19	12622	0.0683473	0.0999757	2.31469	comp124099_c0_seq1
GO:0001537	N-acetylgalactosamine 4-O-sulfotransferase activity	molecular_function	1	287	19	12622	0.0683473	0.0999757	2.31469	comp124673_c0_seq1
GO:0002063	chondrocyte development	biological_process	1	287	19	12622	0.0683473	0.0999757	2.31469	comp124673_c0_seq1
GO:0036342	post-anal tail morphogenesis	biological_process	1	287	19	12622	0.0683473	0.0999757	2.31469	comp124673_c0_seq1
GO:0048703	embryonic viscerocranium morphogenesis	biological_process	1	287	19	12622	0.0683473	0.0999757	2.31469	comp124673_c0_seq1
GO:0008417	fucosyltransferase activity	molecular_function	1	287	19	12622	0.0683473	0.0999757	2.31469	comp125084_c1_seq1
GO:0036065	fucosylation	biological_process	1	287	19	12622	0.0683473	0.0999757	2.31469	comp125084_c1_seq1
GO:0090175	regulation of establishment of planar polarity	biological_process	1	287	19	12622	0.0683473	0.0999757	2.31469	comp126784_c0_seq4
GO:0022824	transmitter-gated ion channel activity	molecular_function	1	287	19	12622	0.0683473	0.0999757	2.31469	comp127520_c0_seq2
GO:0044332	Wnt signaling pathway involved in dorsal/ventral axis specification	biological_process	1	287	19	12622	0.0683473	0.0999757	2.31469	comp128928_c0_seq5
GO:0045955	negative regulation of calcium ion-dependent exocytosis	biological_process	1	287	19	12622	0.0683473	0.0999757	2.31469	comp131373_c0_seq1
GO:0005542	folic acid binding	molecular_function	1	287	19	12622	0.0683473	0.0999757	2.31469	comp133317_c0_seq12
GO:0035999	tetrahydrofolate interconversion	biological_process	1	287	19	12622	0.0683473	0.0999757	2.31469	comp133317_c0_seq12
GO:0006487	protein N-linked glycosylation	biological_process	1	287	19	12622	0.0683473	0.0999757	2.31469	comp134468_c3_seq1
GO:1902476	chloride transmembrane transport	biological_process	3	287	68	12622	0.0688521	0.100346	1.94025	comp104720_c0_seq1; comp127154_c0_seq2; comp127520_c0_seq2
GO:0042981	regulation of apoptotic process	biological_process	3	287	68	12622	0.0688521	0.100346	1.94025	comp110231_c0_seq1; comp121200_c0_seq4; comp121557_c0_seq1
GO:0016337	single organismal cell-cell adhesion	biological_process	3	287	68	12622	0.0688521	0.100346	1.94025	comp116682_c0_seq1; comp117400_c1_seq1; comp133164_c0_seq1
GO:0004713	protein tyrosine kinase activity	molecular_function	2	287	42	12622	0.0697773	0.101325	2.09424	comp111585_c0_seq1; comp128490_c2_seq2
GO:0016459	myosin complex	cellular_component	2	287	42	12622	0.0697773	0.101325	2.09424	comp117536_c0_seq1; comp124626_c0_seq13
GO:0042594	response to starvation	biological_process	2	287	42	12622	0.0697773	0.101325	2.09424	comp120722_c0_seq1; comp124139_c0_seq1
GO:0030054	cell junction	cellular_component	13	287	398	12622	0.0708292	0.102728	1.4365	comp104720_c0_seq1; comp110021_c0_seq1; comp111485_c0_seq1; comp114062_c0_seq1; comp118545_c0_seq1; comp123130_c0_seq2; comp124889_c0_seq1; comp126499_c0_seq9; comp127002_c0_seq4; comp127154_c0_seq2; comp127520_c0_seq2; comp131373_c0_seq1; comp132941_c0_seq2
GO:0007275	multicellular organismal development	biological_process	10	287	293	12622	0.0716024	0.103724	1.50099	comp111033_c0_seq1; comp116197_c0_seq2; comp118631_c0_seq4; comp121505_c0_seq1; comp124889_c0_seq1; comp125981_c0_seq1; comp129756_c0_seq2; comp131755_c0_seq1; comp134851_c0_seq5; comp98100_c0_seq1
GO:0006508	proteolysis	biological_process	5	287	128	12622	0.071876	0.103995	1.71793	comp122809_c0_seq1; comp126555_c0_seq1; comp129772_c1_seq1; comp131416_c0_seq1; comp131814_c0_seq5
GO:0043627	response to estrogen	biological_process	1	287	20	12622	0.0748351	0.106856	2.19895	comp112662_c0_seq1
GO:0008092	cytoskeletal protein binding	molecular_function	1	287	20	12622	0.0748351	0.106856	2.19895	comp115013_c1_seq5
GO:0060429	epithelium development	biological_process	1	287	20	12622	0.0748351	0.106856	2.19895	comp115013_c1_seq5
GO:0008643	carbohydrate transport	biological_process	1	287	20	12622	0.0748351	0.106856	2.19895	comp119530_c0_seq1
GO:0003333	amino acid transmembrane transport	biological_process	1	287	20	12622	0.0748351	0.106856	2.19895	comp119983_c0_seq2
GO:0006665	sphingolipid metabolic process	biological_process	1	287	20	12622	0.0748351	0.106856	2.19895	comp120390_c0_seq1
GO:0005782	peroxisomal matrix	cellular_component	1	287	20	12622	0.0748351	0.106856	2.19895	comp122504_c0_seq1
GO:0019915	lipid storage	biological_process	1	287	20	12622	0.0748351	0.106856	2.19895	comp123066_c0_seq1
GO:0007585	respiratory gaseous exchange	biological_process	1	287	20	12622	0.0748351	0.106856	2.19895	comp124673_c0_seq1
GO:0035861	site of double-strand break	cellular_component	1	287	20	12622	0.0748351	0.106856	2.19895	comp125174_c0_seq1
GO:0035097	histone methyltransferase complex	cellular_component	1	287	20	12622	0.0748351	0.106856	2.19895	comp127897_c0_seq1
GO:0031594	neuromuscular junction	cellular_component	2	287	44	12622	0.0779283	0.111008	1.99905	comp127154_c0_seq2; comp132941_c0_seq2
GO:0043235	receptor complex	cellular_component	2	287	44	12622	0.0779283	0.111008	1.99905	comp128928_c0_seq5; comp56086_c0_seq1
GO:0007517	muscle organ development	biological_process	4	287	101	12622	0.0802548	0.114187	1.74175	comp118941_c1_seq2; comp124626_c0_seq13; comp126784_c0_seq4; comp98075_c0_seq1
GO:0015293	symporter activity	molecular_function	3	287	72	12622	0.0812143	0.115152	1.83246	comp120718_c0_seq2; comp125672_c2_seq1; comp130288_c0_seq2
GO:0035064	methylated histone binding	molecular_function	1	287	21	12622	0.0815098	0.115152	2.09424	comp127897_c0_seq1
GO:0009058	biosynthetic process	biological_process	1	287	21	12622	0.0815098	0.115152	2.09424	comp130351_c0_seq3
GO:0045735	nutrient reservoir activity	molecular_function	1	287	21	12622	0.0815098	0.115152	2.09424	comp134036_c0_seq1
GO:0032456	endocytic recycling	biological_process	1	287	21	12622	0.0815098	0.115152	2.09424	comp39182_c0_seq1
GO:0007179	transforming growth factor beta receptor signaling pathway	biological_process	1	287	21	12622	0.0815098	0.115152	2.09424	comp53390_c0_seq1
GO:0000790	nuclear chromatin	cellular_component	2	287	45	12622	0.0821532	0.115788	1.95463	comp112662_c0_seq1; comp132671_c1_seq1
GO:0030139	endocytic vesicle	cellular_component	2	287	45	12622	0.0821532	0.115788	1.95463	comp128928_c0_seq5; comp39182_c0_seq1
GO:0016491	oxidoreductase activity	molecular_function	4	287	102	12622	0.0829091	0.116716	1.72467	comp119805_c0_seq1; comp122265_c0_seq1; comp125513_c0_seq1; comp134219_c0_seq1
GO:0007520	myoblast fusion	biological_process	2	287	46	12622	0.0864748	0.12145	1.91213	comp128119_c0_seq18; comp134729_c0_seq1
GO:0008236	serine-type peptidase activity	molecular_function	2	287	46	12622	0.0864748	0.12145	1.91213	comp131416_c0_seq1; comp131814_c0_seq5
GO:0022008	neurogenesis	biological_process	4	287	104	12622	0.0883557	0.122517	1.6915	comp119387_c0_seq1; comp125964_c0_seq1; comp127235_c0_seq1; comp127379_c0_seq1
GO:0003707	steroid hormone receptor activity	molecular_function	1	287	22	12622	0.0883598	0.122517	1.99905	comp106051_c0_seq1
GO:0007494	midgut development	biological_process	1	287	22	12622	0.0883598	0.122517	1.99905	comp109070_c1_seq1
GO:0006730	one-carbon metabolic process	biological_process	1	287	22	12622	0.0883598	0.122517	1.99905	comp110696_c0_seq1
GO:0050770	regulation of axonogenesis	biological_process	1	287	22	12622	0.0883598	0.122517	1.99905	comp118941_c1_seq2
GO:0007040	lysosome organization	biological_process	1	287	22	12622	0.0883598	0.122517	1.99905	comp123066_c0_seq1
GO:0060012	synaptic transmission, glycinergic	biological_process	1	287	22	12622	0.0883598	0.122517	1.99905	comp127520_c0_seq2
GO:0015986	ATP synthesis coupled proton transport	biological_process	1	287	22	12622	0.0883598	0.122517	1.99905	comp127915_c0_seq3
GO:0004715	non-membrane spanning protein tyrosine kinase activity	molecular_function	1	287	22	12622	0.0883598	0.122517	1.99905	comp128490_c2_seq2
GO:0045886	negative regulation of synaptic growth at neuromuscular junction	biological_process	1	287	22	12622	0.0883598	0.122517	1.99905	comp128490_c2_seq2
GO:0002250	adaptive immune response	biological_process	1	287	22	12622	0.0883598	0.122517	1.99905	comp130754_c0_seq4
GO:0036064	ciliary basal body	cellular_component	2	287	47	12622	0.0908907	0.125881	1.87145	comp105885_c0_seq3; comp119103_c0_seq1
GO:0030036	actin cytoskeleton organization	biological_process	3	287	75	12622	0.0911556	0.126102	1.75916	comp110231_c0_seq1; comp111585_c0_seq1; comp121557_c0_seq1
GO:0034703	cation channel complex	cellular_component	1	287	23	12622	0.0953737	0.129872	1.91213	comp100130_c0_seq1
GO:0016705	oxidoreductase activity, acting on paired donors, with incorporation or reduction of molecular oxygen	molecular_function	1	287	23	12622	0.0953737	0.129872	1.91213	comp109070_c1_seq1
GO:0019003	GDP binding	molecular_function	1	287	23	12622	0.0953737	0.129872	1.91213	comp119103_c0_seq1
GO:0005328	neurotransmitter:sodium symporter activity	molecular_function	1	287	23	12622	0.0953737	0.129872	1.91213	comp119983_c0_seq2
GO:0051603	proteolysis involved in cellular protein catabolic process	biological_process	1	287	23	12622	0.0953737	0.129872	1.91213	comp122809_c0_seq1
GO:0001501	skeletal system development	biological_process	1	287	23	12622	0.0953737	0.129872	1.91213	comp123066_c0_seq1
GO:0016051	carbohydrate biosynthetic process	biological_process	1	287	23	12622	0.0953737	0.129872	1.91213	comp124673_c0_seq1
GO:0043113	receptor clustering	biological_process	1	287	23	12622	0.0953737	0.129872	1.91213	comp124889_c0_seq1
GO:0016925	protein sumoylation	biological_process	1	287	23	12622	0.0953737	0.129872	1.91213	comp125174_c0_seq1
GO:0006766	vitamin metabolic process	biological_process	1	287	23	12622	0.0953737	0.129872	1.91213	comp128928_c0_seq5
GO:0035269	protein O-linked mannosylation	biological_process	1	287	23	12622	0.0953737	0.129872	1.91213	comp129052_c0_seq8
GO:0008586	imaginal disc-derived wing vein morphogenesis	biological_process	1	287	23	12622	0.0953737	0.129872	1.91213	comp53390_c0_seq1
GO:0000786	nucleosome	cellular_component	1	287	23	12622	0.0953737	0.129872	1.91213	comp92762_c0_seq1
GO:0006909	phagocytosis	biological_process	2	287	48	12622	0.0953988	0.129872	1.83246	comp127080_c0_seq1; comp129772_c1_seq1
GO:0006811	ion transport	biological_process	3	287	77	12622	0.0980912	0.133386	1.71347	comp100130_c0_seq1; comp124099_c0_seq1; comp127520_c0_seq2
GO:0045211	postsynaptic membrane	cellular_component	8	287	241	12622	0.099452	0.135083	1.45989	comp104720_c0_seq1; comp111485_c0_seq1; comp118545_c0_seq1; comp123130_c0_seq2; comp126499_c0_seq9; comp127002_c0_seq4; comp127520_c0_seq2; comp132941_c0_seq2
GO:0005516	calmodulin binding	molecular_function	1	287	24	12622	0.102541	0.137563	1.83246	comp100130_c0_seq1
GO:0008347	glial cell migration	biological_process	1	287	24	12622	0.102541	0.137563	1.83246	comp119994_c0_seq3
GO:0008049	male courtship behavior	biological_process	1	287	24	12622	0.102541	0.137563	1.83246	comp120722_c0_seq1
GO:0043410	positive regulation of MAPK cascade	biological_process	1	287	24	12622	0.102541	0.137563	1.83246	comp121024_c0_seq2
GO:0030898	actin-dependent ATPase activity	molecular_function	1	287	24	12622	0.102541	0.137563	1.83246	comp124626_c0_seq13
GO:0009617	response to bacterium	biological_process	1	287	24	12622	0.102541	0.137563	1.83246	comp126021_c0_seq5
GO:0043200	response to amino acid	biological_process	1	287	24	12622	0.102541	0.137563	1.83246	comp127520_c0_seq2
GO:0000149	SNARE binding	molecular_function	1	287	24	12622	0.102541	0.137563	1.83246	comp131373_c0_seq1
GO:0030307	positive regulation of cell growth	biological_process	1	287	24	12622	0.102541	0.137563	1.83246	comp131818_c0_seq5
GO:0022416	chaeta development	biological_process	1	287	24	12622	0.102541	0.137563	1.83246	comp132941_c0_seq2
GO:0070330	aromatase activity	molecular_function	1	287	24	12622	0.102541	0.137563	1.83246	comp135524_c0_seq1
GO:0015074	DNA integration	biological_process	16	287	535	12622	0.103203	0.138297	1.31526	comp108468_c0_seq2; comp121834_c0_seq1; comp126116_c1_seq19; comp130571_c0_seq21; comp134786_c0_seq4; comp134928_c0_seq3; comp134940_c1_seq2; comp135153_c0_seq1; comp135335_c0_seq1; comp135368_c0_seq1; comp135415_c0_seq1; comp135558_c0_seq3; comp135575_c0_seq1; comp135633_c0_seq1; comp135695_c1_seq1; comp135760_c1_seq1
GO:0031672	A band	cellular_component	2	287	50	12622	0.104682	0.140122	1.75916	comp124626_c0_seq13; comp124738_c1_seq3
GO:0042384	cilium assembly	biological_process	3	287	80	12622	0.10894	0.145659	1.64922	comp105885_c0_seq3; comp114326_c0_seq2; comp39182_c0_seq1
GO:0048846	axon extension involved in axon guidance	biological_process	2	287	51	12622	0.109452	0.145736	1.72467	comp117451_c0_seq1; comp119876_c0_seq1
GO:0009416	response to light stimulus	biological_process	1	287	25	12622	0.10985	0.145736	1.75916	comp100130_c0_seq1
GO:0008146	sulfotransferase activity	molecular_function	1	287	25	12622	0.10985	0.145736	1.75916	comp124673_c0_seq1
GO:0006813	potassium ion transport	biological_process	1	287	25	12622	0.10985	0.145736	1.75916	comp127154_c0_seq2
GO:0016594	glycine binding	molecular_function	1	287	25	12622	0.10985	0.145736	1.75916	comp127520_c0_seq2
GO:0051607	defense response to virus	biological_process	1	287	25	12622	0.10985	0.145736	1.75916	comp130478_c0_seq3
GO:0017022	myosin binding	molecular_function	1	287	25	12622	0.10985	0.145736	1.75916	comp134729_c0_seq1
GO:0030018	Z disc	cellular_component	2	287	52	12622	0.114305	0.151479	1.6915	comp126784_c0_seq4; comp98075_c0_seq1
GO:0090502	RNA phosphodiester bond hydrolysis, endonucleolytic	biological_process	1	287	26	12622	0.117291	0.154073	1.6915	comp119062_c0_seq1
GO:0007369	gastrulation	biological_process	1	287	26	12622	0.117291	0.154073	1.6915	comp119876_c0_seq1
GO:0000187	activation of MAPK activity	biological_process	1	287	26	12622	0.117291	0.154073	1.6915	comp119994_c0_seq3
GO:0045494	photoreceptor cell maintenance	biological_process	1	287	26	12622	0.117291	0.154073	1.6915	comp120390_c0_seq1
GO:0030855	epithelial cell differentiation	biological_process	1	287	26	12622	0.117291	0.154073	1.6915	comp121742_c1_seq1
GO:0005703	polytene chromosome puff	cellular_component	1	287	26	12622	0.117291	0.154073	1.6915	comp124626_c0_seq13
GO:0046667	compound eye retinal cell programmed cell death	biological_process	1	287	26	12622	0.117291	0.154073	1.6915	comp128119_c0_seq18
GO:0035725	sodium ion transmembrane transport	biological_process	1	287	26	12622	0.117291	0.154073	1.6915	comp130288_c0_seq2
GO:0005234	extracellular-glutamate-gated ion channel activity	molecular_function	4	287	114	12622	0.11826	0.155176	1.54313	comp111485_c0_seq1; comp118545_c0_seq1; comp123130_c0_seq2; comp127002_c0_seq4
GO:0003774	motor activity	molecular_function	2	287	54	12622	0.124248	0.16153	1.62886	comp105885_c0_seq3; comp124626_c0_seq13
GO:0006486	protein glycosylation	biological_process	4	287	116	12622	0.124752	0.16153	1.51652	comp113154_c0_seq1; comp123343_c0_seq2; comp125084_c1_seq1; comp126566_c1_seq2
GO:0032992	protein-carbohydrate complex	cellular_component	1	287	27	12622	0.124855	0.16153	1.62886	comp106785_c0_seq1
GO:0032968	positive regulation of transcription elongation from RNA polymerase II promoter	biological_process	1	287	27	12622	0.124855	0.16153	1.62886	comp119843_c2_seq2
GO:0030239	myofibril assembly	biological_process	1	287	27	12622	0.124855	0.16153	1.62886	comp124626_c0_seq13
GO:0030326	embryonic limb morphogenesis	biological_process	1	287	27	12622	0.124855	0.16153	1.62886	comp124673_c0_seq1
GO:0005605	basal lamina	cellular_component	1	287	27	12622	0.124855	0.16153	1.62886	comp124889_c0_seq1
GO:0051491	positive regulation of filopodium assembly	biological_process	1	287	27	12622	0.124855	0.16153	1.62886	comp124889_c0_seq1
GO:0051384	response to glucocorticoid	biological_process	1	287	27	12622	0.124855	0.16153	1.62886	comp127397_c0_seq1
GO:0000776	kinetochore	cellular_component	1	287	27	12622	0.124855	0.16153	1.62886	comp127897_c0_seq1
GO:0042813	Wnt-activated receptor activity	molecular_function	1	287	27	12622	0.124855	0.16153	1.62886	comp128928_c0_seq5
GO:0015020	glucuronosyltransferase activity	molecular_function	1	287	27	12622	0.124855	0.16153	1.62886	comp129052_c0_seq8
GO:0050832	defense response to fungus	biological_process	1	287	27	12622	0.124855	0.16153	1.62886	comp129772_c1_seq1
GO:0030659	cytoplasmic vesicle membrane	cellular_component	2	287	55	12622	0.129333	0.166963	1.59924	comp121407_c0_seq2; comp125948_c0_seq1
GO:0045214	sarcomere organization	biological_process	2	287	55	12622	0.129333	0.166963	1.59924	comp124626_c0_seq13; comp126784_c0_seq4
GO:0005261	cation channel activity	molecular_function	1	287	28	12622	0.132533	0.169449	1.57068	comp100130_c0_seq1
GO:0003693	P-element binding	molecular_function	1	287	28	12622	0.132533	0.169449	1.57068	comp108468_c0_seq2
GO:0006644	phospholipid metabolic process	biological_process	1	287	28	12622	0.132533	0.169449	1.57068	comp121028_c0_seq2
GO:0050885	neuromuscular process controlling balance	biological_process	1	287	28	12622	0.132533	0.169449	1.57068	comp123066_c0_seq1
GO:0030241	skeletal muscle myosin thick filament assembly	biological_process	1	287	28	12622	0.132533	0.169449	1.57068	comp124626_c0_seq13
GO:0018107	peptidyl-threonine phosphorylation	biological_process	1	287	28	12622	0.132533	0.169449	1.57068	comp124738_c1_seq3
GO:0051537	2 iron, 2 sulfur cluster binding	molecular_function	1	287	28	12622	0.132533	0.169449	1.57068	comp134219_c0_seq1
GO:0007480	imaginal disc-derived leg morphogenesis	biological_process	1	287	28	12622	0.132533	0.169449	1.57068	comp53390_c0_seq1
GO:0005871	kinesin complex	cellular_component	1	287	28	12622	0.132533	0.169449	1.57068	comp98507_c0_seq1
GO:0005875	microtubule associated complex	cellular_component	4	287	119	12622	0.134791	0.172153	1.47829	comp107790_c0_seq1; comp116261_c0_seq1; comp119631_c0_seq1; comp120623_c0_seq8
GO:0043005	neuron projection	cellular_component	5	287	153	12622	0.136073	0.173588	1.43723	comp104720_c0_seq1; comp110021_c0_seq1; comp127154_c0_seq2; comp127520_c0_seq2; comp132941_c0_seq2
GO:0007507	heart development	biological_process	3	287	87	12622	0.136204	0.173588	1.51652	comp112662_c0_seq1; comp118941_c1_seq2; comp53390_c0_seq1
GO:0016021	integral component of membrane	cellular_component	59	287	2306	12622	0.13798	0.175664	1.12522	comp100130_c0_seq1; comp104643_c0_seq1; comp110021_c0_seq1; comp111400_c0_seq1; comp111485_c0_seq1; comp112506_c0_seq1; comp112549_c0_seq1; comp113154_c0_seq1; comp113195_c0_seq1; comp114565_c0_seq1; comp115100_c0_seq2; comp116449_c0_seq3; comp117451_c0_seq1; comp117829_c0_seq1; comp117970_c0_seq1; comp119530_c0_seq1; comp119876_c0_seq1; comp119992_c0_seq2; comp120861_c0_seq1; comp121028_c0_seq2;…
GO:0005667	transcription factor complex	cellular_component	2	287	57	12622	0.13972	0.176572	1.54313	comp112662_c0_seq1; comp53390_c0_seq1
GO:0007424	open tracheal system development	biological_process	2	287	57	12622	0.13972	0.176572	1.54313	comp128490_c2_seq2; comp53390_c0_seq1
GO:0030286	dynein complex	cellular_component	1	287	29	12622	0.140314	0.176572	1.51652	comp105885_c0_seq3
GO:0098656	anion transmembrane transport	biological_process	1	287	29	12622	0.140314	0.176572	1.51652	comp113195_c0_seq1
GO:0005044	scavenger receptor activity	molecular_function	1	287	29	12622	0.140314	0.176572	1.51652	comp120861_c0_seq1
GO:0007527	adult somatic muscle development	biological_process	1	287	29	12622	0.140314	0.176572	1.51652	comp124626_c0_seq13
GO:0030512	negative regulation of transforming growth factor beta receptor signaling pathway	biological_process	1	287	29	12622	0.140314	0.176572	1.51652	comp124673_c0_seq1
GO:0009953	dorsal/ventral pattern formation	biological_process	1	287	29	12622	0.140314	0.176572	1.51652	comp129772_c1_seq1
GO:0051124	synaptic growth at neuromuscular junction	biological_process	1	287	29	12622	0.140314	0.176572	1.51652	comp132941_c0_seq2
GO:0030838	positive regulation of actin filament polymerization	biological_process	1	287	29	12622	0.140314	0.176572	1.51652	comp134729_c0_seq1
GO:0007281	germ cell development	biological_process	1	287	29	12622	0.140314	0.176572	1.51652	comp134851_c0_seq5
GO:0019898	extrinsic component of membrane	cellular_component	2	287	58	12622	0.145016	0.181915	1.51652	comp116261_c0_seq1; comp119631_c0_seq1
GO:0008328	ionotropic glutamate receptor complex	cellular_component	2	287	58	12622	0.145016	0.181915	1.51652	comp118545_c0_seq1; comp123130_c0_seq2
GO:0048749	compound eye development	biological_process	2	287	58	12622	0.145016	0.181915	1.51652	comp128119_c0_seq18; comp128490_c2_seq2
GO:0007420	brain development	biological_process	4	287	122	12622	0.145179	0.18193	1.44194	comp113433_c0_seq1; comp114682_c0_seq2; comp118141_c1_seq14; comp121182_c0_seq1
GO:0007623	circadian rhythm	biological_process	1	287	30	12622	0.148191	0.18493	1.46597	comp120722_c0_seq1
GO:0008234	cysteine-type peptidase activity	molecular_function	1	287	30	12622	0.148191	0.18493	1.46597	comp121660_c0_seq1
GO:0044325	ion channel binding	molecular_function	1	287	30	12622	0.148191	0.18493	1.46597	comp123086_c0_seq1
GO:0007274	neuromuscular synaptic transmission	biological_process	1	287	30	12622	0.148191	0.18493	1.46597	comp132941_c0_seq2
GO:0016323	basolateral plasma membrane	cellular_component	3	287	90	12622	0.148659	0.185321	1.46597	comp108380_c0_seq2; comp121407_c0_seq2; comp124099_c0_seq1
GO:0006816	calcium ion transport	biological_process	2	287	59	12622	0.150377	0.187268	1.49082	comp100130_c0_seq1; comp130288_c0_seq2
GO:0070062	extracellular exosome	cellular_component	23	287	845	12622	0.152871	0.190176	1.19706	comp104643_c0_seq1; comp105162_c0_seq1; comp105209_c1_seq1; comp113195_c0_seq1; comp113433_c0_seq1; comp114682_c0_seq2; comp114848_c0_seq1; comp116202_c0_seq1; comp118141_c1_seq14; comp118169_c0_seq1; comp118545_c0_seq1; comp119994_c0_seq3; comp121182_c0_seq1; comp121248_c0_seq1; comp121460_c0_seq1; comp123130_c0_seq2; comp124723_c0_seq10; comp128928_c0_seq5; comp130800_c0_seq3; comp131818_c0_seq…
GO:0007283	spermatogenesis	biological_process	4	287	125	12622	0.1559	0.19286	1.40733	comp111585_c0_seq1; comp116818_c0_seq1; comp134851_c0_seq5; comp98100_c0_seq1
GO:0006457	protein folding	biological_process	4	287	125	12622	0.1559	0.19286	1.40733	comp114919_c0_seq1; comp123741_c0_seq2; comp127100_c1_seq4; comp127149_c1_seq1
GO:0008010	structural constituent of chitin-based larval cuticle	molecular_function	1	287	31	12622	0.156155	0.19286	1.41868	comp106785_c0_seq1
GO:0030023	extracellular matrix constituent conferring elasticity	molecular_function	1	287	31	12622	0.156155	0.19286	1.41868	comp106785_c0_seq1
GO:0043524	negative regulation of neuron apoptotic process	biological_process	1	287	31	12622	0.156155	0.19286	1.41868	comp116818_c0_seq1
GO:0042623	ATPase activity, coupled	molecular_function	1	287	31	12622	0.156155	0.19286	1.41868	comp124626_c0_seq13
GO:0002230	positive regulation of defense response to virus by host	biological_process	1	287	31	12622	0.156155	0.19286	1.41868	comp127555_c0_seq1
GO:0001822	kidney development	biological_process	1	287	32	12622	0.164198	0.202168	1.37435	comp112662_c0_seq1
GO:0035264	multicellular organism growth	biological_process	1	287	32	12622	0.164198	0.202168	1.37435	comp123086_c0_seq1
GO:0006631	fatty acid metabolic process	biological_process	1	287	32	12622	0.164198	0.202168	1.37435	comp130456_c0_seq2
GO:0005777	peroxisome	cellular_component	3	287	94	12622	0.165914	0.204071	1.40359	comp122504_c0_seq1; comp122509_c1_seq1; comp99579_c0_seq1
GO:0005819	spindle	cellular_component	2	287	62	12622	0.166826	0.204983	1.41868	comp123313_c0_seq2; comp128759_c0_seq8
GO:0072372	primary cilium	cellular_component	1	287	33	12622	0.172313	0.210644	1.3327	comp105885_c0_seq3
GO:0000062	fatty-acyl-CoA binding	molecular_function	1	287	33	12622	0.172313	0.210644	1.3327	comp114565_c0_seq1
GO:0030097	hemopoiesis	biological_process	1	287	33	12622	0.172313	0.210644	1.3327	comp125429_c0_seq3
GO:0017147	Wnt-protein binding	molecular_function	1	287	33	12622	0.172313	0.210644	1.3327	comp128928_c0_seq5
GO:0031047	gene silencing by RNA	biological_process	1	287	33	12622	0.172313	0.210644	1.3327	comp134851_c0_seq5
GO:0005975	carbohydrate metabolic process	biological_process	4	287	130	12622	0.174464	0.213056	1.3532	comp119994_c0_seq3; comp123066_c0_seq1; comp129485_c0_seq1; comp130639_c0_seq18
GO:0005102	receptor binding	molecular_function	2	287	64	12622	0.178073	0.217242	1.37435	comp118653_c0_seq1; comp91391_c0_seq1
GO:0006325	chromatin organization	biological_process	1	287	34	12622	0.180492	0.219746	1.2935	comp116818_c0_seq1
GO:0006099	tricarboxylic acid cycle	biological_process	1	287	34	12622	0.180492	0.219746	1.2935	comp128490_c2_seq2
GO:0005938	cell cortex	cellular_component	3	287	99	12622	0.188423	0.229074	1.3327	comp121898_c0_seq4; comp125100_c0_seq4; comp131229_c0_seq1
GO:0030334	regulation of cell migration	biological_process	1	287	35	12622	0.188728	0.229074	1.25655	comp119876_c0_seq1
GO:0042995	cell projection	cellular_component	1	287	35	12622	0.188728	0.229074	1.25655	comp134729_c0_seq1
GO:0005789	endoplasmic reticulum membrane	cellular_component	11	287	397	12622	0.194243	0.235529	1.21856	comp112506_c0_seq1; comp112549_c0_seq1; comp114565_c0_seq1; comp120861_c0_seq1; comp121028_c0_seq2; comp127309_c0_seq1; comp130456_c0_seq2; comp130478_c0_seq3; comp131818_c0_seq5; comp134468_c3_seq1; comp135524_c0_seq1
GO:0004175	endopeptidase activity	molecular_function	1	287	36	12622	0.197014	0.238167	1.22164	comp111400_c0_seq1
GO:0030017	sarcomere	cellular_component	1	287	36	12622	0.197014	0.238167	1.22164	comp124626_c0_seq13
GO:0005643	nuclear pore	cellular_component	1	287	36	12622	0.197014	0.238167	1.22164	comp135515_c0_seq4
GO:0048841	regulation of axon extension involved in axon guidance	biological_process	1	287	37	12622	0.205345	0.246743	1.18862	comp117451_c0_seq1
GO:0018108	peptidyl-tyrosine phosphorylation	biological_process	1	287	37	12622	0.205345	0.246743	1.18862	comp128490_c2_seq2
GO:0005903	brush border	cellular_component	1	287	37	12622	0.205345	0.246743	1.18862	comp128928_c0_seq5
GO:0051539	4 iron, 4 sulfur cluster binding	molecular_function	1	287	37	12622	0.205345	0.246743	1.18862	comp130478_c0_seq3
GO:0007584	response to nutrient	biological_process	1	287	37	12622	0.205345	0.246743	1.18862	comp131818_c0_seq5
GO:0090090	negative regulation of canonical Wnt signaling pathway	biological_process	1	287	37	12622	0.205345	0.246743	1.18862	comp91391_c0_seq1
GO:0006914	autophagy	biological_process	2	287	70	12622	0.212945	0.254979	1.25655	comp104643_c0_seq1; comp125948_c0_seq1
GO:0042383	sarcolemma	cellular_component	1	287	38	12622	0.213712	0.254979	1.15734	comp104643_c0_seq1
GO:0050774	negative regulation of dendrite morphogenesis	biological_process	1	287	38	12622	0.213712	0.254979	1.15734	comp117451_c0_seq1
GO:0007613	memory	biological_process	1	287	38	12622	0.213712	0.254979	1.15734	comp123086_c0_seq1
GO:0042733	embryonic digit morphogenesis	biological_process	1	287	38	12622	0.213712	0.254979	1.15734	comp124673_c0_seq1
GO:0060070	canonical Wnt signaling pathway	biological_process	1	287	38	12622	0.213712	0.254979	1.15734	comp128928_c0_seq5
GO:0006950	response to stress	biological_process	1	287	38	12622	0.213712	0.254979	1.15734	comp129608_c0_seq1
GO:0005506	iron ion binding	molecular_function	4	287	140	12622	0.213902	0.254979	1.25655	comp109070_c1_seq1; comp122911_c0_seq3; comp127309_c0_seq1; comp135524_c0_seq1
GO:0050821	protein stabilization	biological_process	2	287	71	12622	0.218897	0.260675	1.23885	comp104643_c0_seq1; comp124626_c0_seq13
GO:0004674	protein serine/threonine kinase activity	molecular_function	6	287	216	12622	0.221776	0.263455	1.22164	comp110231_c0_seq1; comp111585_c0_seq1; comp117864_c0_seq1; comp121200_c0_seq4; comp121557_c0_seq1; comp124738_c1_seq3
GO:0007412	axon target recognition	biological_process	1	287	39	12622	0.222111	0.263455	1.12767	comp117451_c0_seq1
GO:0071011	precatalytic spliceosome	cellular_component	1	287	39	12622	0.222111	0.263455	1.12767	comp119852_c0_seq5
GO:0042742	defense response to bacterium	biological_process	1	287	39	12622	0.222111	0.263455	1.12767	comp128490_c2_seq2
GO:0008233	peptidase activity	molecular_function	4	287	144	12622	0.230417	0.272369	1.22164	comp110378_c0_seq1; comp131416_c0_seq1; comp131814_c0_seq5; comp134928_c0_seq3
GO:0044281	small molecule metabolic process	biological_process	5	287	181	12622	0.230471	0.272369	1.21489	comp108380_c0_seq2; comp119994_c0_seq3; comp121028_c0_seq2; comp125653_c0_seq7; comp131818_c0_seq5
GO:0007368	determination of left/right symmetry	biological_process	1	287	40	12622	0.230536	0.272369	1.09948	comp105885_c0_seq3
GO:0003824	catalytic activity	molecular_function	1	287	40	12622	0.230536	0.272369	1.09948	comp130478_c0_seq3
GO:0005773	vacuole	cellular_component	1	287	41	12622	0.238981	0.281791	1.07266	comp104643_c0_seq1
GO:0031966	mitochondrial membrane	cellular_component	1	287	41	12622	0.238981	0.281791	1.07266	comp109070_c1_seq1
GO:0019843	rRNA binding	molecular_function	1	287	42	12622	0.247441	0.290908	1.04712	comp116818_c0_seq1
GO:0098779	mitophagy in response to mitochondrial depolarization	biological_process	1	287	42	12622	0.247441	0.290908	1.04712	comp127555_c0_seq1
GO:0030335	positive regulation of cell migration	biological_process	1	287	42	12622	0.247441	0.290908	1.04712	comp91391_c0_seq1
GO:0032403	protein complex binding	molecular_function	2	287	77	12622	0.255246	0.298232	1.14231	comp119843_c2_seq2; comp121742_c1_seq1
GO:0040003	chitin-based cuticle development	biological_process	1	287	43	12622	0.255912	0.298232	1.02277	comp106785_c0_seq1
GO:0015630	microtubule cytoskeleton	cellular_component	1	287	43	12622	0.255912	0.298232	1.02277	comp114326_c0_seq2
GO:0042787	protein ubiquitination involved in ubiquitin-dependent protein catabolic process	biological_process	1	287	43	12622	0.255912	0.298232	1.02277	comp119843_c2_seq2
GO:0051028	mRNA transport	biological_process	1	287	43	12622	0.255912	0.298232	1.02277	comp125339_c1_seq1
GO:0007435	salivary gland morphogenesis	biological_process	1	287	43	12622	0.255912	0.298232	1.02277	comp128490_c2_seq2
GO:0050808	synapse organization	biological_process	1	287	43	12622	0.255912	0.298232	1.02277	comp132941_c0_seq2
GO:0031901	early endosome membrane	cellular_component	1	287	43	12622	0.255912	0.298232	1.02277	comp39182_c0_seq1
GO:0043209	myelin sheath	cellular_component	1	287	43	12622	0.255912	0.298232	1.02277	comp39182_c0_seq1
GO:0004803	transposase activity	molecular_function	1	287	44	12622	0.264387	0.307212	0.999525	comp108468_c0_seq2
GO:0003755	peptidyl-prolyl cis-trans isomerase activity	molecular_function	1	287	44	12622	0.264387	0.307212	0.999525	comp123741_c0_seq2
GO:0007427	epithelial cell migration, open tracheal system	biological_process	1	287	44	12622	0.264387	0.307212	0.999525	comp124626_c0_seq13
GO:0007268	synaptic transmission	biological_process	3	287	115	12622	0.265844	0.308605	1.14728	comp104720_c0_seq1; comp120390_c0_seq1; comp127154_c0_seq2
GO:0031012	extracellular matrix	cellular_component	2	287	79	12622	0.267553	0.309989	1.11339	comp106785_c0_seq1; comp118653_c0_seq1
GO:0005788	endoplasmic reticulum lumen	cellular_component	2	287	79	12622	0.267553	0.309989	1.11339	comp122911_c0_seq3; comp91391_c0_seq1
GO:0004930	G-protein coupled receptor activity	molecular_function	3	287	116	12622	0.270883	0.313543	1.13739	comp111400_c0_seq1; comp129608_c0_seq1; comp130754_c0_seq4
GO:0035220	wing disc development	biological_process	1	287	45	12622	0.272863	0.31462	0.977313	comp126555_c0_seq1
GO:0007519	skeletal muscle tissue development	biological_process	1	287	45	12622	0.272863	0.31462	0.977313	comp134729_c0_seq1
GO:0031175	neuron projection development	biological_process	1	287	45	12622	0.272863	0.31462	0.977313	comp39182_c0_seq1
GO:0030182	neuron differentiation	biological_process	1	287	45	12622	0.272863	0.31462	0.977313	comp91391_c0_seq1
GO:0005700	polytene chromosome	cellular_component	2	287	80	12622	0.273733	0.315319	1.09948	comp123313_c0_seq2; comp128759_c0_seq8
GO:0007417	central nervous system development	biological_process	2	287	81	12622	0.279928	0.322145	1.0859	comp109070_c1_seq1; comp118941_c1_seq2
GO:0007413	axonal fasciculation	biological_process	1	287	46	12622	0.281335	0.323144	0.956067	comp117451_c0_seq1
GO:0048814	regulation of dendrite morphogenesis	biological_process	1	287	46	12622	0.281335	0.323144	0.956067	comp117451_c0_seq1
GO:0009986	cell surface	cellular_component	5	287	196	12622	0.287842	0.330301	1.12192	comp105209_c1_seq1; comp116202_c0_seq1; comp119994_c0_seq3; comp129925_c1_seq5; comp91391_c0_seq1
GO:0008013	beta-catenin binding	molecular_function	1	287	47	12622	0.289799	0.331278	0.935725	comp117451_c0_seq1
GO:0016328	lateral plasma membrane	cellular_component	1	287	47	12622	0.289799	0.331278	0.935725	comp124099_c0_seq1
GO:0006936	muscle contraction	biological_process	1	287	47	12622	0.289799	0.331278	0.935725	comp124626_c0_seq13
GO:0098655	cation transmembrane transport	biological_process	1	287	47	12622	0.289799	0.331278	0.935725	comp126499_c0_seq9
GO:0035235	ionotropic glutamate receptor signaling pathway	biological_process	2	287	83	12622	0.292354	0.333562	1.05974	comp118545_c0_seq1; comp123130_c0_seq2
GO:0035249	synaptic transmission, glutamatergic	biological_process	2	287	83	12622	0.292354	0.333562	1.05974	comp118545_c0_seq1; comp123130_c0_seq2
GO:0005887	integral component of plasma membrane	cellular_component	16	287	643	12622	0.294961	0.336216	1.09435	comp100130_c0_seq1; comp104720_c0_seq1; comp105209_c1_seq1; comp108380_c0_seq2; comp113195_c0_seq1; comp116202_c0_seq1; comp117451_c0_seq1; comp119983_c0_seq2; comp119994_c0_seq3; comp120718_c0_seq2; comp121742_c1_seq1; comp127154_c0_seq2; comp127520_c0_seq2; comp130288_c0_seq2; comp132941_c0_seq2; comp134729_c0_seq1
GO:0000165	MAPK cascade	biological_process	1	287	48	12622	0.298252	0.339321	0.916231	comp110231_c0_seq1
GO:0000281	mitotic cytokinesis	biological_process	1	287	48	12622	0.298252	0.339321	0.916231	comp121557_c0_seq1
GO:0045463	R8 cell development	biological_process	1	287	49	12622	0.306688	0.34727	0.897533	comp117451_c0_seq1
GO:0040011	locomotion	biological_process	1	287	49	12622	0.306688	0.34727	0.897533	comp124626_c0_seq13
GO:0032580	Golgi cisterna membrane	cellular_component	1	287	49	12622	0.306688	0.34727	0.897533	comp125084_c1_seq1
GO:0030198	extracellular matrix organization	biological_process	1	287	49	12622	0.306688	0.34727	0.897533	comp127080_c0_seq1
GO:0017053	transcriptional repressor complex	cellular_component	1	287	49	12622	0.306688	0.34727	0.897533	comp127897_c0_seq1
GO:0018105	peptidyl-serine phosphorylation	biological_process	1	287	50	12622	0.315105	0.356464	0.879582	comp124738_c1_seq3
GO:0006468	protein phosphorylation	biological_process	4	287	165	12622	0.321879	0.362876	1.06616	comp111585_c0_seq1; comp117864_c0_seq1; comp121200_c0_seq4; comp128490_c2_seq2
GO:0031290	retinal ganglion cell axon guidance	biological_process	1	287	51	12622	0.323499	0.362876	0.862335	comp117451_c0_seq1
GO:0048675	axon extension	biological_process	1	287	51	12622	0.323499	0.362876	0.862335	comp117451_c0_seq1
GO:0004725	protein tyrosine phosphatase activity	molecular_function	1	287	51	12622	0.323499	0.362876	0.862335	comp121028_c0_seq2
GO:0004197	cysteine-type endopeptidase activity	molecular_function	1	287	51	12622	0.323499	0.362876	0.862335	comp122809_c0_seq1
GO:0042277	peptide binding	molecular_function	1	287	51	12622	0.323499	0.362876	0.862335	comp123741_c0_seq2
GO:0042127	regulation of cell proliferation	biological_process	1	287	51	12622	0.323499	0.362876	0.862335	comp124673_c0_seq1
GO:0008201	heparin binding	molecular_function	1	287	51	12622	0.323499	0.362876	0.862335	comp124889_c0_seq1
GO:0006874	cellular calcium ion homeostasis	biological_process	1	287	51	12622	0.323499	0.362876	0.862335	comp130288_c0_seq2
GO:0006954	inflammatory response	biological_process	1	287	52	12622	0.331867	0.371567	0.845752	comp130606_c0_seq1
GO:0005741	mitochondrial outer membrane	cellular_component	1	287	52	12622	0.331867	0.371567	0.845752	comp131818_c0_seq5
GO:0045296	cadherin binding	molecular_function	1	287	53	12622	0.340205	0.380192	0.829794	comp117451_c0_seq1
GO:0016042	lipid catabolic process	biological_process	1	287	53	12622	0.340205	0.380192	0.829794	comp134511_c0_seq4
GO:0045202	synapse	cellular_component	4	287	170	12622	0.344375	0.384493	1.0348	comp104720_c0_seq1; comp114062_c0_seq1; comp124889_c0_seq1; comp127520_c0_seq2
GO:0000977	RNA polymerase II regulatory region sequence-specific DNA binding	molecular_function	2	287	92	12622	0.348526	0.388404	0.956067	comp112662_c0_seq1; comp119082_c0_seq1
GO:0032197	transposition, RNA-mediated	biological_process	2	287	92	12622	0.348526	0.388404	0.956067	comp134928_c0_seq3; comp135368_c0_seq1
GO:0006955	immune response	biological_process	1	287	55	12622	0.356782	0.396498	0.79962	comp126021_c0_seq5
GO:0005905	coated pit	cellular_component	1	287	55	12622	0.356782	0.396498	0.79962	comp128928_c0_seq5
GO:0007018	microtubule-based movement	biological_process	1	287	55	12622	0.356782	0.396498	0.79962	comp98507_c0_seq1
GO:0045087	innate immune response	biological_process	3	287	133	12622	0.358234	0.397743	0.99201	comp109312_c0_seq1; comp118653_c0_seq1; comp130478_c0_seq3
GO:0042302	structural constituent of cuticle	molecular_function	2	287	94	12622	0.360985	0.400425	0.935725	comp106785_c0_seq1; comp99867_c0_seq1
GO:0005635	nuclear envelope	cellular_component	1	287	56	12622	0.365015	0.403775	0.785341	comp127897_c0_seq1
GO:0046331	lateral inhibition	biological_process	1	287	56	12622	0.365015	0.403775	0.785341	comp128119_c0_seq18
GO:0008340	determination of adult lifespan	biological_process	1	287	56	12622	0.365015	0.403775	0.785341	comp129772_c1_seq1
GO:0004871	signal transducer activity	molecular_function	1	287	57	12622	0.373207	0.412456	0.771563	comp119994_c0_seq3
GO:0034220	ion transmembrane transport	biological_process	3	287	138	12622	0.384109	0.424113	0.956067	comp118545_c0_seq1; comp123130_c0_seq2; comp127520_c0_seq2
GO:0006397	mRNA processing	biological_process	3	287	139	12622	0.389273	0.429419	0.949189	comp104073_c0_seq1; comp119852_c0_seq5; comp125339_c1_seq1
GO:0045467	R7 cell development	biological_process	2	287	100	12622	0.398104	0.438757	0.879582	comp117451_c0_seq1; comp132941_c0_seq2
GO:0007476	imaginal disc-derived wing morphogenesis	biological_process	2	287	101	12622	0.404239	0.445109	0.870873	comp128490_c2_seq2; comp53390_c0_seq1
GO:0007010	cytoskeleton organization	biological_process	1	287	61	12622	0.405527	0.445708	0.720969	comp126555_c0_seq1
GO:0016787	hydrolase activity	molecular_function	1	287	61	12622	0.405527	0.445708	0.720969	comp99579_c0_seq1
GO:0043565	sequence-specific DNA binding	molecular_function	5	287	226	12622	0.408836	0.448932	0.972989	comp111033_c0_seq1; comp116197_c0_seq2; comp125981_c0_seq1; comp129756_c0_seq2; comp53390_c0_seq1
GO:0042802	identical protein binding	molecular_function	4	287	185	12622	0.412166	0.452175	0.950899	comp100130_c0_seq1; comp116880_c0_seq1; comp128119_c0_seq18; comp132941_c0_seq2
GO:0012505	endomembrane system	cellular_component	1	287	62	12622	0.413484	0.453205	0.70934	comp121742_c1_seq1
GO:0035556	intracellular signal transduction	biological_process	3	287	144	12622	0.41499	0.454025	0.916231	comp117864_c0_seq1; comp119994_c0_seq3; comp53390_c0_seq1
GO:0007264	small GTPase mediated signal transduction	biological_process	3	287	144	12622	0.41499	0.454025	0.916231	comp119103_c0_seq1; comp119876_c0_seq1; comp124765_c0_seq2
GO:0010629	negative regulation of gene expression	biological_process	2	287	103	12622	0.416454	0.455212	0.853963	comp119603_c0_seq1; comp53390_c0_seq1
GO:0009055	electron carrier activity	molecular_function	1	287	63	12622	0.421387	0.460184	0.698081	comp109070_c1_seq1
GO:0005525	GTP binding	molecular_function	6	287	272	12622	0.423963	0.462575	0.970127	comp118959_c0_seq1; comp119103_c0_seq1; comp119876_c0_seq1; comp121287_c0_seq1; comp39182_c0_seq1; comp83381_c0_seq1
GO:0007155	cell adhesion	biological_process	5	287	230	12622	0.425075	0.463366	0.956067	comp115013_c1_seq5; comp116202_c0_seq1; comp118653_c0_seq1; comp132941_c0_seq2; comp134729_c0_seq1
GO:0005886	plasma membrane	cellular_component	36	287	1567	12622	0.429159	0.467052	1.01037	comp100130_c0_seq1; comp105209_c1_seq1; comp108380_c0_seq2; comp110021_c0_seq1; comp110696_c0_seq1; comp111400_c0_seq1; comp112549_c0_seq1; comp113195_c0_seq1; comp115013_c1_seq5; comp116261_c0_seq1; comp117451_c0_seq1; comp117829_c0_seq1; comp118545_c0_seq1; comp119103_c0_seq1; comp119631_c0_seq1; comp119876_c0_seq1; comp121742_c1_seq1; comp122176_c1_seq1; comp123130_c0_seq2; comp124723_c0_seq10…
GO:0008021	synaptic vesicle	cellular_component	1	287	64	12622	0.429236	0.467052	0.687173	comp104643_c0_seq1
GO:0044331	cell-cell adhesion mediated by cadherin	biological_process	1	287	67	12622	0.452438	0.491406	0.656404	comp117451_c0_seq1
GO:0001701	in utero embryonic development	biological_process	1	287	67	12622	0.452438	0.491406	0.656404	comp56086_c0_seq1
GO:0008283	cell proliferation	biological_process	2	287	110	12622	0.458511	0.497551	0.79962	comp119994_c0_seq3; comp128928_c0_seq5
GO:0015031	protein transport	biological_process	5	287	241	12622	0.469339	0.50884	0.912429	comp105209_c1_seq1; comp116202_c0_seq1; comp116261_c0_seq1; comp119631_c0_seq1; comp121742_c1_seq1
GO:0005929	cilium	cellular_component	2	287	112	12622	0.470296	0.509417	0.785341	comp114326_c0_seq2; comp121200_c0_seq4
GO:0007399	nervous system development	biological_process	2	287	114	12622	0.481965	0.521585	0.771563	comp119992_c0_seq2; comp129898_c0_seq1
GO:0003713	transcription coactivator activity	molecular_function	1	287	71	12622	0.482522	0.521716	0.619424	comp112662_c0_seq1
GO:0030154	cell differentiation	biological_process	4	287	201	12622	0.483267	0.52205	0.875206	comp124889_c0_seq1; comp129925_c1_seq5; comp98075_c0_seq1; comp98100_c0_seq1
GO:0046982	protein heterodimerization activity	molecular_function	2	287	115	12622	0.487754	0.526423	0.764854	comp100130_c0_seq1; comp132941_c0_seq2
GO:0000943	retrotransposon nucleocapsid	cellular_component	1	287	72	12622	0.489883	0.528245	0.610821	comp134928_c0_seq3
GO:0000278	mitotic cell cycle	biological_process	1	287	73	12622	0.497179	0.534668	0.602453	comp121200_c0_seq4
GO:0031225	anchored component of membrane	cellular_component	1	287	73	12622	0.497179	0.534668	0.602453	comp129544_c0_seq1
GO:0004540	ribonuclease activity	molecular_function	1	287	73	12622	0.497179	0.534668	0.602453	comp134928_c0_seq3
GO:0001078	transcriptional repressor activity, RNA polymerase II core promoter proximal region sequence-specific binding	molecular_function	1	287	74	12622	0.504407	0.541469	0.594312	comp112662_c0_seq1
GO:0008289	lipid binding	molecular_function	1	287	74	12622	0.504407	0.541469	0.594312	comp134036_c0_seq1
GO:0008285	negative regulation of cell proliferation	biological_process	2	287	118	12622	0.50493	0.541546	0.745408	comp112662_c0_seq1; comp119082_c0_seq1
GO:0005794	Golgi apparatus	cellular_component	9	287	429	12622	0.513771	0.550534	0.922638	comp112549_c0_seq1; comp114062_c0_seq1; comp123086_c0_seq1; comp124673_c0_seq1; comp125544_c0_seq1; comp125948_c0_seq1; comp128928_c0_seq5; comp129052_c0_seq8; comp132652_c0_seq1
GO:0008360	regulation of cell shape	biological_process	1	287	76	12622	0.518661	0.555278	0.578672	comp132941_c0_seq2
GO:0046872	metal ion binding	molecular_function	47	287	2109	12622	0.522252	0.558623	0.980094	comp105620_c0_seq1; comp106051_c0_seq1; comp107790_c0_seq1; comp108468_c0_seq2; comp109329_c0_seq1; comp111585_c0_seq1; comp111845_c0_seq1; comp112506_c0_seq1; comp116682_c0_seq1; comp117114_c0_seq1; comp117400_c1_seq1; comp118653_c0_seq1; comp119062_c0_seq1; comp119082_c0_seq1; comp119423_c0_seq2; comp119603_c0_seq1; comp120623_c0_seq8; comp120888_c0_seq1; comp121557_c0_seq1; comp122081_c1_seq5;…
GO:0007298	border follicle cell migration	biological_process	1	287	77	12622	0.525686	0.561795	0.571157	comp124626_c0_seq13
GO:0019901	protein kinase binding	molecular_function	1	287	79	12622	0.539526	0.576072	0.556697	comp119994_c0_seq3
GO:0003924	GTPase activity	molecular_function	3	287	170	12622	0.542992	0.579256	0.776102	comp119876_c0_seq1; comp121287_c0_seq1; comp83381_c0_seq1
GO:0006278	RNA-dependent DNA replication	biological_process	2	287	125	12622	0.543813	0.579615	0.703666	comp134928_c0_seq3; comp135718_c0_seq1
GO:0019076	viral release from host cell	biological_process	1	287	80	12622	0.546342	0.581793	0.549739	comp134928_c0_seq3
GO:0008380	RNA splicing	biological_process	2	287	126	12622	0.549223	0.584342	0.698081	comp119852_c0_seq5; comp125339_c1_seq1
GO:0016318	ommatidial rotation	biological_process	1	287	81	12622	0.553086	0.587409	0.542952	comp117451_c0_seq1
GO:0016032	viral process	biological_process	1	287	81	12622	0.553086	0.587409	0.542952	comp127897_c0_seq1
GO:0003779	actin binding	molecular_function	1	287	82	12622	0.55976	0.593445	0.53633	comp115013_c1_seq5
GO:0090501	RNA phosphodiester bond hydrolysis	biological_process	1	287	82	12622	0.55976	0.593445	0.53633	comp134928_c0_seq3
GO:0071897	DNA biosynthetic process	biological_process	1	287	84	12622	0.572894	0.606832	0.523561	comp134928_c0_seq3
GO:0001077	transcriptional activator activity, RNA polymerase II core promoter proximal region sequence-specific binding	molecular_function	1	287	85	12622	0.579354	0.611512	0.517401	comp112662_c0_seq1
GO:0071013	catalytic step 2 spliceosome	cellular_component	1	287	85	12622	0.579354	0.611512	0.517401	comp119852_c0_seq5
GO:0048812	neuron projection morphogenesis	biological_process	1	287	85	12622	0.579354	0.611512	0.517401	comp119876_c0_seq1
GO:0016055	Wnt signaling pathway	biological_process	1	287	85	12622	0.579354	0.611512	0.517401	comp91391_c0_seq1
GO:0004842	ubiquitin-protein transferase activity	molecular_function	2	287	133	12622	0.586014	0.617997	0.66134	comp122234_c0_seq3; comp131087_c0_seq1
GO:0048477	oogenesis	biological_process	2	287	134	12622	0.591111	0.622824	0.656404	comp132489_c0_seq1; comp134036_c0_seq1
GO:0050660	flavin adenine dinucleotide binding	molecular_function	1	287	89	12622	0.604475	0.636345	0.494147	comp133317_c0_seq12
GO:0016339	calcium-dependent cell-cell adhesion via plasma membrane cell adhesion molecules	biological_process	1	287	90	12622	0.610575	0.642203	0.488657	comp117451_c0_seq1
GO:0006313	transposition, DNA-mediated	biological_process	2	287	139	12622	0.615988	0.647328	0.632793	comp108468_c0_seq2; comp135718_c0_seq1
GO:0007186	G-protein coupled receptor signaling pathway	biological_process	1	287	91	12622	0.616604	0.647408	0.483287	comp131409_c0_seq1
GO:0016874	ligase activity	molecular_function	3	287	187	12622	0.618478	0.648806	0.705547	comp122234_c0_seq3; comp122942_c0_seq1; comp125174_c0_seq1
GO:0005911	cell-cell junction	cellular_component	1	287	92	12622	0.622562	0.651948	0.478034	comp117451_c0_seq1
GO:0031965	nuclear membrane	cellular_component	1	287	92	12622	0.622562	0.651948	0.478034	comp135515_c0_seq4
GO:0043066	negative regulation of apoptotic process	biological_process	2	287	141	12622	0.62565	0.65461	0.623817	comp110378_c0_seq1; comp124673_c0_seq1
GO:0007411	axon guidance	biological_process	4	287	239	12622	0.636952	0.665854	0.736052	comp112662_c0_seq1; comp117451_c0_seq1; comp119082_c0_seq1; comp128490_c2_seq2
GO:0016192	vesicle-mediated transport	biological_process	1	287	96	12622	0.645677	0.673213	0.458116	comp110021_c0_seq1
GO:0008134	transcription factor binding	molecular_function	1	287	96	12622	0.645677	0.673213	0.458116	comp121024_c0_seq2
GO:0006897	endocytosis	biological_process	1	287	96	12622	0.645677	0.673213	0.458116	comp39182_c0_seq1
GO:0005856	cytoskeleton	cellular_component	3	287	194	12622	0.647207	0.67422	0.680089	comp112859_c0_seq2; comp121016_c0_seq5; comp121024_c0_seq2
GO:0050839	cell adhesion molecule binding	molecular_function	1	287	97	12622	0.651279	0.677873	0.453393	comp117451_c0_seq1
GO:0004872	receptor activity	molecular_function	2	287	149	12622	0.662616	0.689074	0.590323	comp117451_c0_seq1; comp128928_c0_seq5
GO:0055114	oxidation-reduction process	biological_process	1	287	100	12622	0.667662	0.693119	0.439791	comp128759_c0_seq8
GO:0016887	ATPase activity	molecular_function	1	287	100	12622	0.667662	0.693119	0.439791	comp98507_c0_seq1
GO:0016607	nuclear speck	cellular_component	1	287	101	12622	0.672984	0.698039	0.435437	comp125339_c1_seq1
GO:0004672	protein kinase activity	molecular_function	1	287	104	12622	0.688536	0.713552	0.422876	comp111585_c0_seq1
GO:0007156	homophilic cell adhesion via plasma membrane adhesion molecules	biological_process	2	287	157	12622	0.696874	0.721569	0.560243	comp117451_c0_seq1; comp128119_c0_seq18
GO:0006357	regulation of transcription from RNA polymerase II promoter	biological_process	3	287	212	12622	0.714324	0.738998	0.622346	comp112662_c0_seq1; comp119082_c0_seq1; comp53390_c0_seq1
GO:0005925	focal adhesion	cellular_component	2	287	162	12622	0.716917	0.741041	0.542952	comp119994_c0_seq3; comp121024_c0_seq2
GO:0045893	positive regulation of transcription, DNA-templated	biological_process	3	287	213	12622	0.717763	0.741276	0.619424	comp112662_c0_seq1; comp119082_c0_seq1; comp121200_c0_seq4
GO:0006974	cellular response to DNA damage stimulus	biological_process	1	287	111	12622	0.722467	0.745491	0.396208	comp121200_c0_seq4
GO:0003887	DNA-directed DNA polymerase activity	molecular_function	2	287	164	12622	0.724643	0.747093	0.53633	comp134928_c0_seq3; comp135335_c0_seq1
GO:0000287	magnesium ion binding	molecular_function	1	287	113	12622	0.731573	0.753589	0.389196	comp99579_c0_seq1
GO:0006310	DNA recombination	biological_process	3	287	221	12622	0.744188	0.765852	0.597001	comp134928_c0_seq3; comp135335_c0_seq1; comp135709_c1_seq3
GO:0006810	transport	biological_process	1	287	116	12622	0.744756	0.765852	0.37913	comp108380_c0_seq2
GO:0005768	endosome	cellular_component	1	287	117	12622	0.749026	0.769583	0.37589	comp128928_c0_seq5
GO:0044212	transcription regulatory region DNA binding	molecular_function	1	287	121	12622	0.765498	0.785833	0.363464	comp112662_c0_seq1
GO:0004523	RNA-DNA hybrid ribonuclease activity	molecular_function	1	287	123	12622	0.773377	0.793242	0.357554	comp134928_c0_seq3
GO:0006886	intracellular protein transport	biological_process	1	287	127	12622	0.788447	0.808006	0.346292	comp39182_c0_seq1
GO:0000978	RNA polymerase II core promoter proximal region sequence-specific DNA binding	molecular_function	1	287	129	12622	0.795647	0.814688	0.340923	comp119082_c0_seq1
GO:0043234	protein complex	cellular_component	1	287	132	12622	0.806041	0.824626	0.333175	comp121742_c1_seq1
GO:0045892	negative regulation of transcription, DNA-templated	biological_process	3	287	243	12622	0.80713	0.825014	0.542952	comp112662_c0_seq1; comp119082_c0_seq1; comp127897_c0_seq1
GO:0003682	chromatin binding	molecular_function	2	287	189	12622	0.807798	0.825014	0.465387	comp112662_c0_seq1; comp127897_c0_seq1
GO:0043547	positive regulation of GTPase activity	biological_process	1	287	142	12622	0.837375	0.854494	0.309712	comp124889_c0_seq1
GO:0005730	nucleolus	cellular_component	6	287	421	12622	0.848039	0.864639	0.62678	comp104073_c0_seq1; comp112662_c0_seq1; comp116818_c0_seq1; comp123313_c0_seq2; comp127897_c0_seq1; comp128759_c0_seq8
GO:0005737	cytoplasm	cellular_component	54	287	2712	12622	0.851569	0.8675	0.87569	comp104919_c0_seq1; comp105620_c0_seq1; comp110231_c0_seq1; comp110696_c0_seq1; comp111585_c0_seq1; comp114807_c0_seq1; comp114848_c0_seq1; comp114919_c0_seq1; comp115013_c1_seq5; comp119103_c0_seq1; comp119371_c0_seq1; comp119805_c0_seq1; comp120390_c0_seq1; comp121016_c0_seq5; comp121024_c0_seq2; comp121200_c0_seq4; comp121248_c0_seq1; comp121287_c0_seq1; comp121557_c0_seq1; comp121742_c1_seq1;…
GO:0003700	transcription factor activity, sequence-specific DNA binding	molecular_function	8	287	545	12622	0.87737	0.893024	0.645565	comp111845_c0_seq1; comp116197_c0_seq2; comp118941_c1_seq2; comp121990_c0_seq2; comp125981_c0_seq1; comp126428_c0_seq1; comp129756_c0_seq2; comp98100_c0_seq1
GO:0006915	apoptotic process	biological_process	2	287	223	12622	0.886175	0.90122	0.394431	comp119876_c0_seq1; comp134200_c0_seq4
GO:0045944	positive regulation of transcription from RNA polymerase II promoter	biological_process	4	287	339	12622	0.888478	0.902796	0.518927	comp112662_c0_seq1; comp118941_c1_seq2; comp124889_c0_seq1; comp53390_c0_seq1
GO:0005759	mitochondrial matrix	cellular_component	1	287	166	12622	0.894741	0.90839	0.264934	comp133317_c0_seq12
GO:0000122	negative regulation of transcription from RNA polymerase II promoter	biological_process	3	287	297	12622	0.909616	0.922709	0.444233	comp116818_c0_seq1; comp118941_c1_seq2; comp121024_c0_seq2
GO:0030424	axon	cellular_component	1	287	178	12622	0.915787	0.928183	0.247074	comp117451_c0_seq1
GO:0005524	ATP binding	molecular_function	21	287	1250	12622	0.920946	0.932624	0.738849	comp104073_c0_seq1; comp110231_c0_seq1; comp111585_c0_seq1; comp114326_c0_seq2; comp114919_c0_seq1; comp117864_c0_seq1; comp121016_c0_seq5; comp121200_c0_seq4; comp121557_c0_seq1; comp124626_c0_seq13; comp124738_c1_seq3; comp124873_c0_seq3; comp127100_c1_seq4; comp127149_c1_seq1; comp127394_c0_seq2; comp128490_c2_seq2; comp131818_c0_seq5; comp134928_c0_seq3; comp135633_c0_seq1; comp39182_c0_seq1;…
GO:0007165	signal transduction	biological_process	2	287	248	12622	0.924187	0.935115	0.35467	comp112662_c0_seq1; comp91391_c0_seq1
GO:0016020	membrane	cellular_component	13	287	865	12622	0.933563	0.943805	0.660957	comp114565_c0_seq1; comp121248_c0_seq1; comp121460_c0_seq1; comp121557_c0_seq1; comp124673_c0_seq1; comp126672_c0_seq1; comp128928_c0_seq5; comp130800_c0_seq3; comp131818_c0_seq5; comp134303_c1_seq7; comp134468_c3_seq1; comp135524_c0_seq1; comp56086_c0_seq1
GO:0042803	protein homodimerization activity	molecular_function	3	287	322	12622	0.93801	0.947501	0.409743	comp117451_c0_seq1; comp124626_c0_seq13; comp132941_c0_seq2
GO:0000166	nucleotide binding	molecular_function	1	287	202	12622	0.946599	0.955371	0.217718	comp125339_c1_seq1
GO:0003723	RNA binding	molecular_function	5	287	462	12622	0.954472	0.962506	0.475964	comp119062_c0_seq1; comp119298_c0_seq2; comp125339_c1_seq1; comp134928_c0_seq3; comp135335_c0_seq1
GO:0005813	centrosome	cellular_component	1	287	212	12622	0.955975	0.963211	0.207449	comp123086_c0_seq1
GO:0005739	mitochondrion	cellular_component	9	287	716	12622	0.967642	0.974147	0.55281	comp109070_c1_seq1; comp110231_c0_seq1; comp116880_c0_seq1; comp122504_c0_seq1; comp123201_c0_seq4; comp126312_c0_seq1; comp127915_c0_seq3; comp130351_c0_seq3; comp133317_c0_seq12
GO:0005829	cytosol	cellular_component	13	287	960	12622	0.975683	0.981417	0.59555	comp100130_c0_seq1; comp104919_c0_seq1; comp116261_c0_seq1; comp118169_c0_seq1; comp118959_c0_seq1; comp119603_c0_seq1; comp119631_c0_seq1; comp119805_c0_seq1; comp119876_c0_seq1; comp123086_c0_seq1; comp125653_c0_seq7; comp132652_c0_seq1; comp135822_c0_seq1
GO:0005743	mitochondrial inner membrane	cellular_component	1	287	267	12622	0.985198	0.990157	0.164716	comp127915_c0_seq3
GO:0003677	DNA binding	molecular_function	18	287	1500	12622	0.999002	0.999992	0.527749	comp106051_c0_seq1; comp111845_c0_seq1; comp116818_c0_seq1; comp117114_c0_seq1; comp119603_c0_seq1; comp120888_c0_seq1; comp124139_c0_seq1; comp125197_c0_seq2; comp125429_c0_seq3; comp126428_c0_seq1; comp131464_c0_seq1; comp134928_c0_seq3; comp135335_c0_seq1; comp135368_c0_seq1; comp53390_c0_seq1; comp83643_c0_seq1; comp92762_c0_seq1; comp98100_c0_seq1
GO:0044822	poly(A) RNA binding	molecular_function	2	287	508	12622	0.999413	0.999992	0.173146	comp119852_c0_seq5; comp127242_c0_seq1
GO:0006355	regulation of transcription, DNA-templated	biological_process	9	287	1004	12622	0.999443	0.999992	0.394235	comp111033_c0_seq1; comp111845_c0_seq1; comp117114_c0_seq1; comp120888_c0_seq1; comp126428_c0_seq1; comp131464_c0_seq1; comp132166_c0_seq3; comp135368_c0_seq1; comp98100_c0_seq1
GO:0005654	nucleoplasm	cellular_component	6	287	854	12622	0.999755	0.999992	0.308987	comp111585_c0_seq1; comp112662_c0_seq1; comp116818_c0_seq1; comp127897_c0_seq1; comp133303_c0_seq29; comp134598_c0_seq1
GO:0006351	transcription, DNA-templated	biological_process	14	287	1382	12622	0.999802	0.999992	0.445519	comp104073_c0_seq1; comp106051_c0_seq1; comp111845_c0_seq1; comp116197_c0_seq2; comp116818_c0_seq1; comp117114_c0_seq1; comp118941_c1_seq2; comp119082_c0_seq1; comp119843_c2_seq2; comp120888_c0_seq1; comp126428_c0_seq1; comp131464_c0_seq1; comp132166_c0_seq3; comp98100_c0_seq1
GO:0005634	nucleus	cellular_component	42	287	3182	12622	0.999992	0.999992	0.580491	comp105620_c0_seq1; comp106051_c0_seq1; comp111033_c0_seq1; comp111585_c0_seq1; comp111845_c0_seq1; comp112662_c0_seq1; comp114608_c0_seq1; comp116197_c0_seq2; comp116818_c0_seq1; comp117114_c0_seq1; comp118169_c0_seq1; comp118941_c1_seq2; comp118959_c0_seq1; comp119082_c0_seq1; comp119603_c0_seq1; comp119805_c0_seq1; comp120888_c0_seq1; comp121024_c0_seq2; comp123313_c0_seq2; comp124139_c0_seq1;…
