# Supplementary material
Source: MDPI journal article supplement (https://www.mdpi.com/2077-1312/10/6/737)
Supplement: s1 [file s1 › Table S6.xlsx]

## Sheet: Sheet1
Sex-differentiation related genes	Seq. Name	baseMean	baseMean_Sample_testis	baseMean_Sample_ovary	foldChange	log2FoldChange	pval	padj	up_down	fpkm_Sample_testis	fpkm_Sample_ovary	length	NR.id.and.Des	NR.e.value	swiss.id	swiss.e.value	swiss.Des	KOG.id	KOG.e.value	KOG.Des	kegg.id	kegg.term	kegg_hits_numbers	KO_ENTRY	KO_name	KO_Definition	GO.id	GO.term
insulin-like growth factor-binding domain protein (IAGBP)	comp109312_c0_seq1	1967.52	3921.61	13.435	0.000894737	-8.1893	0.0057328	0.590447	Down	98.7913	0.648835	915	gi|597502293|sp|G4V4G0.1|SIBD2_CUPSARecName: Full=Single insulin-like growth factor-binding domain protein-2; Short=SIBD-2; Flags: Precursor	8e-07	sp|G4V4G0|SIBD2_CUPSA	2e-06	Single insulin-like growth factor-binding domain protein-2 OS=Cupiennius salei PE=1 SV=1										GO:0005576;GO:0045087;GO:0001558	extracellular region|innate immune response|regulation of cell growth
male reproductive-related protein (Mrr)	comp105695_c0_seq1	4087.43	8150.82	24.0416	0.0029496	-8.40527	0.00722622	0.666395	Down	586.388	0.887963	626	gi|146432667|gb|ABQ41234.1|male reproductive-related protein [Macrobrachium rosenbergii]	4e-47
	comp106877_c0_seq1	13758.2	27507.9	8.48528	0.000308467	-11.6626	0.00846356	0.720867	Down	288.905	0.0431596	4288	gi|146432661|gb|ABQ41231.1|male reproductive-related protein [Macrobrachium rosenbergii]	1e-39	sp|Q9BXM0|PRAX_HUMAN	9e-08	Periaxin OS=Homo sapiens GN=PRX PE=1 SV=2
	comp120831_c0_seq1	1157.18	2311.53	2.82843	0.00122362	-9.67463	0.00271551	0.420164	Down	79.113	0.0438019	1316	gi|146432663|gb|ABQ41232.1|male reproductive-related protein [Macrobrachium rosenbergii]	1e-41
	comp129936_c3_seq1	20549.6	41076.5	22.6274	0.00055086	-10.826	0.0265124	1	Down	1866.68	0.519841	991	gi|146432655|gb|ABQ41228.1|male reproductive-related protein B [Macrobrachium rosenbergii]	1e-53
	comp98075_c0_seq1	1209.86	2387.19	32.5269	0.0136256	-6.19754	0.0243247	1	Down	57.7017	0.398391	1863	gi|146432689|gb|ABQ41245.1|male reproductive-related LIM protein [Macrobrachium rosenbergii]	1e-34	sp|P53777|MLP1_DROME	7e-21	Muscle LIM protein 1 OS=Drosophila melanogaster GN=Mlp60A PE=2 SV=1	KOG1700	6e-20	Regulatory protein MLP and related LIM proteins							GO:0005634;GO:0030018;GO:0008270;GO:0030154;GO:0007517;GO:0060537	nucleus|Z disc|zinc ion binding|cell differentiation|muscle organ development|muscle tissue development
kazal-type proteinase inhibitor (MRPINK)	comp77256_c0_seq1	3288.05	6576.09	0	0	#NAME?	0.000391215	0.33299	Down	361.167	0	820	gi|178925340|gb|ACB78013.1|semigranular hemocyte specific kazal-type proteinase inhibitor [Pacifastacus leniusculus]	1e-18	sp|P82968|MCPI_MELCP	5e-12	Four-domain proteases inhibitor OS=Melithaea caledonica PE=1 SV=1	KOG3509	2e-11	Basement membrane-specific heparan sulfate proteoglycan (HSPG) core protein	ko04512	ECM-receptor interaction	1	K06254	AGRN	agrin	GO:0004867	serine-type endopeptidase inhibitor activity
	comp124889_c0_seq1	17756.2	35495.3	16.9706	0.000478107	-11.0304	0.0185337	1	Down	1057.93	0.258087	1511	gi|363498186|gb|AEW24505.1|Kazal-type protease inhibitor [Macrobrachium nipponense]	2e-72	sp|P31696|AGRIN_CHICK	8e-15	Agrin OS=Gallus gallus GN=AGRN PE=1 SV=3	KOG3509	1e-13	Basement membrane-specific heparan sulfate proteoglycan (HSPG) core protein	ko04512	ECM-receptor interaction	1	K06254	AGRN	agrin	GO:0005605;GO:0030054;GO:0005576;GO:0016021;GO:0005886;GO:0045202;GO:0030548;GO:0005509;GO:0035374;GO:0002162;GO:0043395;GO:0008201;GO:0043236;GO:0033691;GO:0030297;GO:0007171;GO:0030154;GO:0007213;GO:0007275;GO:0051491;GO:0043547;GO:0045887;GO:0045944;GO:0043113;GO:0010469	basal lamina|cell junction|extracellular region|integral component of membrane|plasma membrane|synapse|acetylcholine receptor regulator activity|calcium ion binding|chondroitin sulfate binding|dystroglycan binding|heparan sulfate proteoglycan binding|heparin binding|laminin binding|sialic acid binding|transmembrane receptor protein tyrosine kinase activator activity|activation of transmembrane re…
testis-specific protein kinase 1 (TESK1)	comp111585_c0_seq1	6000.15	11996.1	4.24264	0.000353669		0.00192142	0.378845	Down	302.99	0.0639837	1783	gi|645021959|ref|XP_008206905.1|PREDICTED: probable serine/threonine-protein kinase DDB_G0281745 [Nasonia vitripennis]	3e-09	sp|Q96S53|TESK2_HUMAN	5e-11	Dual specificity testis-specific protein kinase 2 OS=Homo sapiens GN=TESK2 PE=1 SV=1										GO:0005737;GO:0005654;GO:0005634;GO:0005524;GO:0046872;GO:0004672;GO:0004674;GO:0004712;GO:0004713;GO:0030036;GO:0048041;GO:0006468;GO:0007283	cytoplasm|nucleoplasm|nucleus|ATP binding|metal ion binding|protein kinase activity|protein serine/threonine kinase activity|protein serine/threonine/tyrosine kinase activity|protein tyrosine kinase activity|actin cytoskeleton organization|focal adhesion assembly|protein phosphorylation|spermatogenesis
spermatogenesis-related proteins	comp116818_c0_seq1	10401.5	11.3137	20791.8	1837.75	10.8437	0.00676773	0.646937	Up	0.282903	258.11	1857	gi|951526476|ref|XP_014467453.1|PREDICTED: jmjC domain-containing histone demethylation protein 1-like [Dinoponera quadriceps]	2e-38	sp|Q8NHM5|KDM2B_HUMAN	3e-34	Lysine-specific demethylase 2B OS=Homo sapiens GN=KDM2B PE=1 SV=1	KOG1947	1e-37	Leucine rich repeat proteins, some proteins contain F-box							GO:0005730;GO:0005654;GO:0005634;GO:0003677;GO:0032452;GO:0051864;GO:0019843;GO:0008270;GO:0006325;GO:0048596;GO:0030900;GO:0021592;GO:0030902;GO:0016577;GO:0035518;GO:0021993;GO:0021670;GO:0030901;GO:0021555;GO:2000178;GO:0043524;GO:0000122;GO:0007283;GO:0021678;GO:0006351	nucleolus|nucleoplasm|nucleus|DNA binding|histone demethylase activity|histone demethylase activity (H3-K36 specific)|rRNA binding|zinc ion binding|chromatin organization|embryonic camera-type eye morphogenesis|forebrain development|fourth ventricle development|hindbrain development|histone demethylation|histone H2A monoubiquitination|initiation of neural tube closure|lateral ventricle developmen…
	comp134851_c0_seq5	2165.87	5.65685	4326.08	764.75	9.57884	0.00224773	0.399969	Up	0.0423369	16.8421	5922	gi|762128131|ref|XP_011447160.1|PREDICTED: uncharacterized protein LOC105342062 isoform X3 [Crassostrea gigas]	6e-28	sp|Q58EK5|TDRD1_DANRE	1e-17	Tudor domain-containing protein 1 OS=Danio rerio GN=tdrd1 PE=1 SV=2	KOG2039	5e-17	Transcriptional coactivator p100							GO:0005737;GO:0043186;GO:0071546;GO:0046872;GO:0043046;GO:0031047;GO:0007281;GO:0051321;GO:0007275;GO:0034587;GO:0007283	cytoplasm|P granule|pi-body|metal ion binding|DNA methylation involved in gamete generation|gene silencing by RNA|germ cell development|meiotic cell cycle|multicellular organismal development|piRNA metabolic process|spermatogenesis
	comp98100_c0_seq1	1089.3	0.707107	2177.89	3080	11.5887	0.000905666	0.33299	Up	0.0318223	48.0757	1044	gi|961102175|ref|XP_014775838.1|PREDICTED: zinc finger protein 271-like, partial [Octopus bimaculoides]	7e-39	sp|P15620|ZN271_MOUSE	2e-33	Zinc finger protein 271 OS=Mus musculus GN=Znf271 PE=2 SV=1	KOG1721	7e-33	FOG: Zn-finger	ko00310	Lysine degradation	1	K20796	PRDM7_9	histone-lysine N-methyltransferase PRDM7/9	GO:0005634;GO:0003677;GO:0046872;GO:0003700;GO:0030154;GO:0002437;GO:0007275;GO:0045629;GO:0002829;GO:0006355;GO:0007283;GO:0006351	nucleus|DNA binding|metal ion binding|transcription factor activity, sequence-specific DNA binding|cell differentiation|inflammatory response to antigenic stimulus|multicellular organismal development|negative regulation of T-helper 2 cell differentiation|negative regulation of type 2 immune response|regulation of transcription, DNA-templated|spermatogenesis|transcription, DNA-templated
Cathepsin	comp108551_c0_seq1	83.4386	0	166.877	Inf	Inf	0.0452464	1	Up	0	4.48904	854	gi|196123668|gb|ACG70181.1|cathepsin D-like protein [Homarus americanus]	4e-88	sp|Q03168|ASPP_AEDAE	1e-69	Lysosomal aspartic protease OS=Aedes aegypti GN=AAEL006169 PE=1 SV=2	KOG1339	2e-67	Aspartyl protease	ko04210;ko04140;ko04142;ko04071;ko05152	Apoptosis|Autophagy - animal|Lysosome|Sphingolipid signaling pathway|Tuberculosis	5	K01379	CTSD	cathepsin D	GO:0005764;GO:0004190	lysosome|aspartic-type endopeptidase activity
	comp121660_c0_seq1	355.321	9.19239	701.45	76.3077	6.25376	0.0391839	1	Up	0.249568	9.71512	1664	gi|478486836|gb|AGJ03550.1|cathepsin L [Palaemon carinicauda]	3e-140	sp|P25782|CYSP2_HOMAM	4e-121	Digestive cysteine proteinase 2 OS=Homarus americanus GN=LCP2 PE=2 SV=1	KOG1543	8e-99	Cysteine proteinase Cathepsin L	ko04210;ko04140;ko04142;ko04145;ko05205;ko05418;ko05323;ko04612	Apoptosis|Autophagy - animal|Lysosome|Phagosome|Proteoglycans in cancer|Fluid shear stress and atherosclerosis|Rheumatoid arthritis|Antigen processing and presentation	8	K01365	CTSL	cathepsin L	GO:0008234	cysteine-type peptidase activity
	comp123201_c0_seq4	173.241	346.482	0	0	#NAME?	0.0251983	1	Down	8.2855	0	1883	gi|310693525|gb|ADP05100.1|truncated cathepsin A [Eriocheir sinensis]	4e-95	sp|Q3MI05|PPGB_BOVIN	9e-79	Lysosomal protective protein OS=Bos taurus GN=CTSA PE=2 SV=1	KOG1282	4e-78	Serine carboxypeptidases (lysosomal cathepsin A)	ko04142;ko04614	Lysosome|Renin-angiotensin system	2	K13289	CTSA, CPY	cathepsin A (carboxypeptidase C)	GO:0005764;GO:0005739;GO:0004185	lysosome|mitochondrion|serine-type carboxypeptidase activity
Cell division protein
cyclin B	comp124361_c0_seq2	3426.29	53.033	6799.54	128.213	7.0024	0.0163439	1	Up	1.28699	84.085	1864	gi|585694619|ref|XP_006821857.1|PREDICTED: G2/mitotic-specific cyclin-B-like [Saccoglossus kowalevskii]	5e-27	sp|P25011|CCNB1_SOYBN	5e-21	G2/mitotic-specific cyclin S13-6 OS=Glycine max PE=2 SV=1	KOG0653	1e-20	Cyclin B and related kinase-activating proteins	ko04110;ko04115;ko04068;ko04914	Cell cycle|p53 signaling pathway|FoxO signaling pathway|Progesterone-mediated oocyte maturation	4	K05868	CCNB	cyclin B	GO:0005634;GO:0051301;GO:0007067	nucleus|cell division|mitotic nuclear division
Chromobox protein homolog 1	comp127897_c0_seq1	4527.96	3.53553	9052.38	2560.4	11.3222	0.0012485	0.34072	Up	0.170672	207.641	1005	gi|913317271|ref|XP_013189614.1|PREDICTED: chromobox protein homolog 1-like [Amyelois transitella]	5e-39	sp|P45973|CBX5_HUMAN	7e-40	Chromobox protein homolog 5 OS=Homo sapiens GN=CBX5 PE=1 SV=1	KOG1911	2e-40	Heterochromatin-associated protein HP1 and related CHROMO domain proteins							GO:0010369;GO:0000118;GO:0035097;GO:0000776;GO:0000784;GO:0005635;GO:0005720;GO:0031618;GO:0005730;GO:0005654;GO:0005634;GO:0017053;GO:0003682;GO:0035064;GO:0030674;GO:0070491;GO:0007596;GO:0045892;GO:0016032	chromocenter|histone deacetylase complex|histone methyltransferase complex|kinetochore|nuclear chromosome, telomeric region|nuclear envelope|nuclear heterochromatin|nuclear pericentric heterochromatin|nucleolus|nucleoplasm|nucleus|transcriptional repressor complex|chromatin binding|methylated histone binding|protein binding, bridging|repressing transcription factor binding|blood coagulation|negat…
doublesex (dsx)	comp109085_c0_seq1	111.016	222.032	1.35679	0.00432566	-7.21796	0.0491365	1	Down	39.3099	0.00345316	1074	gi|337733630|gb|AEI72264.1|crustacean female sex hormonoe, partial [Carcinus maenas]	7e-10
male reproductive-related protein	comp105695_c0_seq1	4087.43	8150.82	24.0416	0.0029496	-8.40527	0.00722622	0.666395	Down	586.388	0.887963	626	gi|146432667|gb|ABQ41234.1|male reproductive-related protein [Macrobrachium rosenbergii]	4e-47
	comp106877_c0_seq1	13758.2	27507.9	8.48528	0.000308467	-11.6626	0.00846356	0.720867	Down	288.905	0.0431596	4288	gi|146432661|gb|ABQ41231.1|male reproductive-related protein [Macrobrachium rosenbergii]	1e-39	sp|Q9BXM0|PRAX_HUMAN	9e-08	Periaxin OS=Homo sapiens GN=PRX PE=1 SV=2
	comp120831_c0_seq1	1157.18	2311.53	2.82843	0.00122362	-9.67463	0.00271551	0.420164	Down	79.113	0.0438019	1316	gi|146432663|gb|ABQ41232.1|male reproductive-related protein [Macrobrachium rosenbergii]	1e-41
male sterility domain-containing protein	comp122509_c1_seq1	934.795	7.07107	1862.52	263.4	8.04111	0.00691894	0.654786	Up	0.0826146	10.6794	4019	gi|242017448|ref|XP_002429200.1|male sterility domain-containing protein, putative [Pediculus humanus corporis]	8e-108	sp|A1ZAI5|FACR1_DROME	3e-115	Putative fatty acyl-CoA reductase CG5065 OS=Drosophila melanogaster GN=CG5065 PE=3 SV=1	KOG1221	8e-116	Acyl-CoA reductase	ko04146;ko00073;ko04212	Peroxisome|Cutin, suberine and wax biosynthesis|Longevity regulating pathway - worm	3	K13356	FAR	alcohol-forming fatty acyl-CoA reductase	GO:0016021;GO:0005778;GO:0005777;GO:0080019;GO:0050062;GO:0008611;GO:0035336;GO:0010025	integral component of membrane|peroxisomal membrane|peroxisome|fatty-acyl-CoA reductase (alcohol-forming) activity|long-chain-fatty-acyl-CoA reductase activity|ether lipid biosynthetic process|long-chain fatty-acyl-CoA metabolic process|wax biosynthetic process
male reproductive-related protein B	comp129936_c3_seq1	20549.6	41076.5	22.6274	0.00055086	-10.826	0.0265124	1	Down	1866.68	0.519841	991	gi|146432655|gb|ABQ41228.1|male reproductive-related protein B [Macrobrachium rosenbergii]	1e-53
male reproductive-related LIM protein	comp98075_c0_seq1	1209.86	2387.19	32.5269	0.0136256	-6.19754	0.0243247	1	Down	57.7017	0.398391	1863	gi|146432689|gb|ABQ41245.1|male reproductive-related LIM protein [Macrobrachium rosenbergii]	1e-34	sp|P53777|MLP1_DROME	7e-21	Muscle LIM protein 1 OS=Drosophila melanogaster GN=Mlp60A PE=2 SV=1	KOG1700	6e-20	Regulatory protein MLP and related LIM proteins							GO:0005634;GO:0030018;GO:0008270;GO:0030154;GO:0007517;GO:0060537	nucleus|Z disc|zinc ion binding|cell differentiation|muscle organ development|muscle tissue development
insulin-like growth factor-binding domain protein-2	comp109312_c0_seq1	1967.52	13.435	3921.61	291.895	8.1893	0.0057328	0.590447	Up	0.648835	98.7913	915	gi|597502293|sp|G4V4G0.1|SIBD2_CUPSARecName: Full=Single insulin-like growth factor-binding domain protein-2; Short=SIBD-2; Flags: Precursor	8e-07	sp|G4V4G0|SIBD2_CUPSA	2e-06	Single insulin-like growth factor-binding domain protein-2 OS=Cupiennius salei PE=1 SV=1										GO:0005576;GO:0045087;GO:0001558	extracellular region|innate immune response|regulation of cell growth
Insulin-like receptor (IR)	comp132702_c0_seq3	1035.2	2068.99	1.41421	0.0001463	-10.5147	0.00149591	0.356591	Down	7.65496	0.00866316	6230	gi|1012981176|gb|KYQ55071.1|Insulin-like receptor [Trachymyrmex zeteki]	0	sp|P08069|IGF1R_HUMAN	3e-176	Insulin-like growth factor 1 receptor OS=Homo sapiens GN=IGF1R PE=1 SV=1	KOG4258	7e-177	Insulin/growth factor receptor (contains protein kinase domain)	ko04520;ko04014;ko04015;ko04022;ko04066;ko04068;ko04072;ko04150;ko04151;ko04152;ko04930;ko04931;ko04932;ko04211;ko04212;ko04213;ko04910;ko04913;ko04923;ko04960	Adherens junction|Ras signaling pathway|Rap1 signaling pathway|cGMP - PKG signaling pathway|HIF-1 signaling pathway|FoxO signaling pathway|Phospholipase D signaling pathway|mTOR signaling pathway|PI3K-Akt signaling pathway|AMPK signaling pathway|Type II diabetes mellitus|Insulin resistance|Non-alcoholic fatty liver disease (NAFLD)|Longevity regulating pathway - mammal|Longevity regulating pathway…	20	K04527	INSR, CD220	insulin receptor
Actin related genes	comp121016_c0_seq5	886.005	1764.94	7.07107	0.00400641	-7.96347	0.00811792	0.704024	Down	60.2631	0.117626	1319	gi|3907620|gb|AAC78681.1|actin 1 [Penaeus monodon]	7e-178	sp|P49871|ACT_MANSE	0	Actin, muscle OS=Manduca sexta PE=2 SV=1	KOG0676	0	Actin and related proteins	ko04210;ko04810;ko04510;ko04520;ko04530;ko04145;ko04015;ko04390;ko04391;ko05205;ko05410;ko05412;ko05414;ko05416;ko05418;ko05100;ko05110;ko05130;ko05131;ko05132;ko05164;ko04919;ko04921;ko04611;ko04670;ko04745	Apoptosis|Regulation of actin cytoskeleton|Focal adhesion|Adherens junction|Tight junction|Phagosome|Rap1 signaling pathway|Hippo signaling pathway|Hippo signaling pathway -fly|Proteoglycans in cancer|Hypertrophic cardiomyopathy (HCM)|Arrhythmogenic right ventricular cardiomyopathy (ARVC)|Dilated cardiomyopathy (DCM)|Viral myocarditis|Fluid shear stress and atherosclerosis|Bacterial invasion of e…	26	K05692	ACTB_G1	actin beta/gamma 1	GO:0005737;GO:0005856;GO:0005524	cytoplasm|cytoskeleton|ATP binding
ankyrin repeat protein	comp119992_c0_seq2	402.344	7.07107	797.616	112.8	6.81762	0.0253393	1	Up	0.158197	8.94724	2055	gi|123449118|ref|XP_001313281.1|ankyrin repeat protein [Trichomonas vaginalis G3]	2e-35	sp|Q7T163|KDIS_DANRE	5e-28	Kinase D-interacting substrate of 220 kDa OS=Danio rerio GN=kidins220 PE=2 SV=2	KOG0504	2e-29	FOG: Ankyrin repeat	ko04722	Neurotrophin signaling pathway	1	K12460	KIDINS220, ARMS	ankyrin repeat-rich membrane spanning protein	GO:0016021;GO:0005770;GO:0007399	integral component of membrane|late endosome|nervous system development
	comp125027_c0_seq1	99.7021	0	199.404	Inf	Inf	0.0358575	1	Up	0	2.33899	1967	gi|443708311|gb|ELU03480.1|hypothetical protein CAPTEDRAFT_192646 [Capitella teleta]	2e-96	sp|Q18297|TRPA1_CAEEL	1e-63	Transient receptor potential cation channel subfamily A member 1 homolog OS=Caenorhabditis elegans GN=trpa-1 PE=2 SV=5	KOG0510	4e-64	Ankyrin repeat protein
	comp130870_c0_seq1	2406.64	0.707107	4812.57	6806	12.7326	0.000424456	0.33299	Up	0.00878006	29.6355	3744	gi|919095888|ref|XP_013384672.1|PREDICTED: uncharacterized protein LOC106154754 [Lingula anatina]	1e-67	sp|Q8NAG6|ANKL1_HUMAN	4e-54	Ankyrin repeat and LEM domain-containing protein 1 OS=Homo sapiens GN=ANKLE1 PE=2 SV=2
Ankyrin repeat and LEM domain-containing protein 1	comp130870_c0_seq1	2406.64	0.707107	4812.57	6806	12.7326	0.000424456	0.33299	Up	0.00878006	29.6355	3744	gi|919095888|ref|XP_013384672.1|PREDICTED: uncharacterized protein LOC106154754 [Lingula anatina]	1e-67	sp|Q8NAG6|ANKL1_HUMAN	4e-54	Ankyrin repeat and LEM domain-containing protein 1 OS=Homo sapiens GN=ANKLE1 PE=2 SV=2
serine/threonine-protein phosphatase 2A (PPP2A)	comp133303_c0_seq29	235.113	2.82843	467.398	160.006	7.36851	0.0369112	1	Up	0.0115984	3.59638	5851	gi|761918468|ref|XP_011408177.1|PREDICTED: ankyrin-3-like [Amphimedon queenslandica]	8e-38	sp|O15084|ANR28_HUMAN	9e-37	Serine/threonine-protein phosphatase 6 regulatory ankyrin repeat subunit A OS=Homo sapiens GN=ANKRD28 PE=1 SV=5	KOG4177	2e-29	Ankyrin	ko05205;ko04624	Proteoglycans in cancer|Toll and Imd signaling pathway	2	K10380	ANK	ankyrin	GO:0005654	nucleoplasm
hypothetical protein	comp100010_c0_seq1	1297.54	2595.08	0	0	#NAME?	0.000731609	0.33299	Down	82.1755	0	1422	gi|954185902|gb|KRW98778.1|hypothetical protein PPERSA_03913 [Pseudocohnilembus persalinus]	3e-18
	comp106051_c0_seq1	18588.1	13.435	37162.7	2766.11	11.4336	0.0169478	1	Up	0.344485	492.349	1740	gi|443700841|gb|ELT99607.1|hypothetical protein CAPTEDRAFT_167148 [Capitella teleta]	4e-25	sp|Q9W6I9|THA_ONCMY	5e-18	Thyroid hormone receptor alpha (Fragment) OS=Oncorhynchus mykiss GN=thra PE=3 SV=1	KOG3575	5e-16	FOG: Hormone receptors							GO:0005634;GO:0003677;GO:0046872;GO:0003707;GO:0070324;GO:0004887;GO:0030522;GO:0006351	nucleus|DNA binding|metal ion binding|steroid hormone receptor activity|thyroid hormone binding|thyroid hormone receptor activity|intracellular receptor signaling pathway|transcription, DNA-templated
	comp109070_c0_seq1	335.522	7.77817	663.266	85.2727	6.41401	0.0373714	1	Up	0.15534	6.93708	2206	gi|260835488|ref|XP_002612740.1|hypothetical protein BRAFLDRAFT_97280 [Branchiostoma floridae]	1e-08
	comp109329_c0_seq1	17543.7	2.12132	35085.2	16539.3	14.0136	0.00593764	0.604969	Up	0.034218	330.799	2445	gi|443693726|gb|ELT95020.1|hypothetical protein CAPTEDRAFT_183922 [Capitella teleta]	3e-44	sp|Q8BTK5|SMYD4_MOUSE	7e-32	SET and MYND domain-containing protein 4 OS=Mus musculus GN=Smyd4 PE=2 SV=2	KOG2084	1e-33	Predicted histone tail methylase containing SET domain							GO:0046872;GO:0008168	metal ion binding|methyltransferase activity
	comp110309_c0_seq2	298.046	596.091	0	0	#NAME?	0.00884134	0.742202	Down	14.7641	0	1819	gi|952536988|gb|KRT83977.1|hypothetical protein AMK59_2236, partial [Oryctes borbonicus]	2e-11
	comp110746_c0_seq2	177.13	352.846	1.41421	0.00400802	-7.9629	0.0427453	1	Down	9.06103	0.0269398	1753	gi|954190257|gb|KRX03048.1|hypothetical protein PPERSA_08123 [Pseudocohnilembus persalinus]	7e-06
	comp111364_c0_seq1	202.94	0	405.879	Inf	Inf	0.0108752	0.82481	Up	0	10.3646	904	gi|918287616|gb|KOF67384.1|hypothetical protein OCBIM_22009709mg [Octopus bimaculoides]	3e-06
	comp112491_c0_seq1	111.016	0	222.032	Inf	Inf	0.0307696	1	Up	0	4.37438	1173	gi|308469594|ref|XP_003097034.1|hypothetical protein CRE_21981 [Caenorhabditis remanei]	2e-06
	comp113311_c0_seq1	3425.23	2.82843	6847.62	2421	11.2414	0.00100179	0.33299	Up	0.0368385	41.831	3774	gi|557153712|emb|CDI79193.1|hypothetical protein EPH_0049300 [Eimeria praecox]	3e-12
Angiotensin converting enzyme (ACE)	comp123201_c0_seq4	173.241	346.482	0	0	#NAME?	0.0251983	1	Down	8.2855	0	1883	gi|310693525|gb|ADP05100.1|truncated cathepsin A [Eriocheir sinensis]	4e-95	sp|Q3MI05|PPGB_BOVIN	9e-79	Lysosomal protective protein OS=Bos taurus GN=CTSA PE=2 SV=1	KOG1282	4e-78	Serine carboxypeptidases (lysosomal cathepsin A)	ko04142;ko04614	Lysosome|Renin-angiotensin system	2	K13289	CTSA, CPY	cathepsin A (carboxypeptidase C)	GO:0005764;GO:0005739;GO:0004185	lysosome|mitochondrion|serine-type carboxypeptidase activity
Cathepsin-related genes
cathepsin D-like protein	comp108551_c0_seq1	83.4386	0	166.877	Inf	Inf	0.0452464	1	Up	0	4.48904	854	gi|196123668|gb|ACG70181.1|cathepsin D-like protein [Homarus americanus]	4e-88	sp|Q03168|ASPP_AEDAE	1e-69	Lysosomal aspartic protease OS=Aedes aegypti GN=AAEL006169 PE=1 SV=2	KOG1339	2e-67	Aspartyl protease	ko04210;ko04140;ko04142;ko04071;ko05152	Apoptosis|Autophagy - animal|Lysosome|Sphingolipid signaling pathway|Tuberculosis	5	K01379	CTSD	cathepsin D	GO:0005764;GO:0004190	lysosome|aspartic-type endopeptidase activity
cathepsin L	comp121660_c0_seq1	355.321	9.19239	701.45	76.3077	6.25376	0.0391839	1	Up	0.249568	9.71512	1664	gi|478486836|gb|AGJ03550.1|cathepsin L [Palaemon carinicauda]	3e-140	sp|P25782|CYSP2_HOMAM	4e-121	Digestive cysteine proteinase 2 OS=Homarus americanus GN=LCP2 PE=2 SV=1	KOG1543	8e-99	Cysteine proteinase Cathepsin L	ko04210;ko04140;ko04142;ko04145;ko05205;ko05418;ko05323;ko04612	Apoptosis|Autophagy - animal|Lysosome|Phagosome|Proteoglycans in cancer|Fluid shear stress and atherosclerosis|Rheumatoid arthritis|Antigen processing and presentation	8	K01365	CTSL	cathepsin L	GO:0008234	cysteine-type peptidase activity
cathepsin A	comp123201_c0_seq4	173.241	346.482	0	0	#NAME?	0.0251983	1	Down	8.2855	0	1883	gi|310693525|gb|ADP05100.1|truncated cathepsin A [Eriocheir sinensis]	4e-95	sp|Q3MI05|PPGB_BOVIN	9e-79	Lysosomal protective protein OS=Bos taurus GN=CTSA PE=2 SV=1	KOG1282	4e-78	Serine carboxypeptidases (lysosomal cathepsin A)	ko04142;ko04614	Lysosome|Renin-angiotensin system	2	K13289	CTSA, CPY	cathepsin A (carboxypeptidase C)	GO:0005764;GO:0005739;GO:0004185	lysosome|mitochondrion|serine-type carboxypeptidase activity
Cell division cycle-related protein
cell division control protein 42	comp119876_c0_seq1	7595.39	2.12132	15188.7	7160	12.8057	0.001358	0.342918	Up	0.0544321	198.387	1765	gi|313235815|emb|CBY19799.1|unnamed protein product [Oikopleura dioica]	2e-51	sp|Q03206|RAC1_CAEEL	9e-63	Ras-related protein ced-10 OS=Caenorhabditis elegans GN=ced-10 PE=1 SV=2	KOG0393	2e-63	Ras-related small GTPase, Rho type	ko04810;ko04510;ko04520;ko04530;ko04144;ko04010;ko04011;ko04014;ko04015;ko04370;ko05200;ko05203;ko05205;ko05211;ko05212;ko04932;ko04933;ko05100;ko05120;ko05130;ko05131;ko05132;ko04360;ko04912;ko04062;ko04660;ko04666;ko04670;ko04722	Regulation of actin cytoskeleton|Focal adhesion|Adherens junction|Tight junction|Endocytosis|MAPK signaling pathway|MAPK signaling pathway - yeast|Ras signaling pathway|Rap1 signaling pathway|VEGF signaling pathway|Pathways in cancer|Viral carcinogenesis|Proteoglycans in cancer|Renal cell carcinoma|Pancreatic cancer|Non-alcoholic fatty liver disease (NAFLD)|AGE-RAGE signaling pathway in diabetic …	29	K04393	CDC42	cell division control protein 42	GO:0009898;GO:0031410;GO:0005829;GO:0016021;GO:0043025;GO:0005886;GO:0005525;GO:0003924;GO:0006915;GO:0048846;GO:0031103;GO:0010171;GO:0016477;GO:0097628;GO:0033563;GO:0010172;GO:0043652;GO:0007369;GO:0008045;GO:0002119;GO:0045138;GO:0001764;GO:0048812;GO:0030334;GO:0050764;GO:0007264	cytoplasmic side of plasma membrane|cytoplasmic vesicle|cytosol|integral component of membrane|neuronal cell body|plasma membrane|GTP binding|GTPase activity|apoptotic process|axon extension involved in axon guidance|axon regeneration|body morphogenesis|cell migration|distal tip cell migration|dorsal/ventral axon guidance|embryonic body morphogenesis|engulfment of apoptotic cell|gastrulation|moto…
Cyclin-related genes
cyclin B	comp124361_c0_seq2	3426.29	53.033	6799.54	128.213	7.0024	0.0163439	1	Up	1.28699	84.085	1864	gi|585694619|ref|XP_006821857.1|PREDICTED: G2/mitotic-specific cyclin-B-like [Saccoglossus kowalevskii]	5e-27	sp|P25011|CCNB1_SOYBN	5e-21	G2/mitotic-specific cyclin S13-6 OS=Glycine max PE=2 SV=1	KOG0653	1e-20	Cyclin B and related kinase-activating proteins	ko04110;ko04115;ko04068;ko04914	Cell cycle|p53 signaling pathway|FoxO signaling pathway|Progesterone-mediated oocyte maturation	4	K05868	CCNB	cyclin B	GO:0005634;GO:0051301;GO:0007067	nucleus|cell division|mitotic nuclear division
Disrupted meiotic cDNA (Dmc1)
meiotic recombination protein REC114-like	comp111975_c0_seq1	596.091	1185.11	7.07107	0.00596659	-7.38888	0.0144768	0.966023	Down	42.2206	0.132753	1264	gi|524878661|ref|XP_005096013.1|PREDICTED: meiotic recombination protein REC114-like [Aplysia californica]	2e-06
glycosyl-phosphatidylinositol-linked carbonic anhydrase	comp110696_c0_seq1	2252.49	12.0208	4492.96	373.765	8.54599	0.00459536	0.535095	Up	0.446496	86.3728	1199	gi|409892959|gb|AFV46145.1|glycosyl-phosphatidylinositol-linked carbonic anhydrase [Portunus trituberculatus]	9e-49	sp|Q8UWA5|CAH2_TRIHK	2e-41	Carbonic anhydrase 2 OS=Tribolodon hakonensis GN=ca2 PE=2 SV=3	KOG0382	1e-36	Carbonic anhydrase	ko00910	Nitrogen metabolism	1	K01672	CA	carbonic anhydrase	GO:0005737;GO:0005886;GO:0004089;GO:0008270;GO:0006730	cytoplasm|plasma membrane|carbonate dehydratase activity|zinc ion binding|one-carbon metabolic process
heat shock protein 21	comp132318_c0_seq2	423.911	842.164	5.65685	0.00671704	-7.21796	0.021007	1	Down	6.82219	0.0238898	5559	gi|356651196|gb|AET34915.1|heat shock protein 21 [Macrobrachium rosenbergii]	7e-15
Immunoglobulin
Immunoglobulin C-2	comp128119_c0_seq18	172.181	342.947	1.41421	0.00412371	-7.92184	0.0447472	1	Down	5.13753	0.00999578	3009	gi|1009525509|ref|XP_015908801.1|PREDICTED: irregular chiasm C-roughest protein-like isoform X2 [Parasteatoda tepidariorum]	2e-102	sp|Q08180|ICCR_DROME	9e-102	Irregular chiasm C-roughest protein OS=Drosophila melanogaster GN=rst PE=1 SV=2	KOG3510	2e-97	FOG: Immunoglobulin C-2 Type/fibronectin type III domains							GO:0045177;GO:0005913;GO:0016021;GO:0005886;GO:0042802;GO:0030165;GO:0048749;GO:0001745;GO:0046667;GO:0007156;GO:0046331;GO:0007520;GO:0016202;GO:0046666	apical part of cell|cell-cell adherens junction|integral component of membrane|plasma membrane|identical protein binding|PDZ domain binding|compound eye development|compound eye morphogenesis|compound eye retinal cell programmed cell death|homophilic cell adhesion via plasma membrane adhesion molecules|lateral inhibition|myoblast fusion|regulation of striated muscle tissue development|retinal cel…
Kinesin-like protein
|Kinesin-like protein KIF21B	comp122019_c0_seq1	1512.85	3025.71	0	0	#NAME?	0.000616388	0.33299	Down	64.1563	0	2124	gi|685828850|emb|CEF63772.1|Kinesin-like protein KIF21B [Strongyloides ratti]	2e-09
Leucine-rich repeats (LRR)-containing protein
Leucine rich repeat proteins	comp116818_c0_seq1	10401.5	11.3137	20791.8	1837.75	10.8437	0.00676773	0.646937	Up	0.282903	258.11	1857	gi|951526476|ref|XP_014467453.1|PREDICTED: jmjC domain-containing histone demethylation protein 1-like [Dinoponera quadriceps]	2e-38	sp|Q8NHM5|KDM2B_HUMAN	3e-34	Lysine-specific demethylase 2B OS=Homo sapiens GN=KDM2B PE=1 SV=1	KOG1947	1e-37	Leucine rich repeat proteins, some proteins contain F-box							GO:0005730;GO:0005654;GO:0005634;GO:0003677;GO:0032452;GO:0051864;GO:0019843;GO:0008270;GO:0006325;GO:0048596;GO:0030900;GO:0021592;GO:0030902;GO:0016577;GO:0035518;GO:0021993;GO:0021670;GO:0030901;GO:0021555;GO:2000178;GO:0043524;GO:0000122;GO:0007283;GO:0021678;GO:0006351	nucleolus|nucleoplasm|nucleus|DNA binding|histone demethylase activity|histone demethylase activity (H3-K36 specific)|rRNA binding|zinc ion binding|chromatin organization|embryonic camera-type eye morphogenesis|forebrain development|fourth ventricle development|hindbrain development|histone demethylation|histone H2A monoubiquitination|initiation of neural tube closure|lateral ventricle developmen…
Sxl3	comp126667_c0_seq1	13989.8	3.53553	27976	7912.8	12.95	0.00493962	0.547995	Up	0.0867617	373.436	1727	gi|75022291|sp|Q9GV46.1|LUCB_OPLGRRecName: Full=Oplophorus-luciferin 2-monooxygenase non-catalytic subunit; Flags: Precursor	5e-47	sp|Q9GV46|LUCB_OPLGR	5e-54	Oplophorus-luciferin 2-monooxygenase non-catalytic subunit OS=Oplophorus gracilirostris PE=1 SV=1	KOG0619	8e-14	FOG: Leucine rich repeat
leucine-rich repeat-containing protein DDB_G0290503	comp135887_c0_seq1	112.784	225.567	0	0	#NAME?	0.0481019	1	Down	9.9163	0	1024	gi|805771930|ref|XP_012136795.1|PREDICTED: putative leucine-rich repeat-containing protein DDB_G0290503 [Megachile rotundata]	8e-14
Male reproductive-related protein	comp105695_c0_seq1	4087.43	8150.82	24.0416	0.0029496	-8.40527	0.00722622	0.666395	Down	586.388	0.887963	626	gi|146432667|gb|ABQ41234.1|male reproductive-related protein [Macrobrachium rosenbergii]	4e-47
	comp106877_c0_seq1	13758.2	27507.9	8.48528	0.000308467	-11.6626	0.00846356	0.720867	Down	288.905	0.0431596	4288	gi|146432661|gb|ABQ41231.1|male reproductive-related protein [Macrobrachium rosenbergii]	1e-39	sp|Q9BXM0|PRAX_HUMAN	9e-08	Periaxin OS=Homo sapiens GN=PRX PE=1 SV=2
	comp120831_c0_seq1	1157.18	2311.53	2.82843	0.00122362	-9.67463	0.00271551	0.420164	Down	79.113	0.0438019	1316	gi|146432663|gb|ABQ41232.1|male reproductive-related protein [Macrobrachium rosenbergii]	1e-41
doublesex gene	comp109085_c0_seq1	111.016	222.032	0	0	#NAME?	0.0491365	1	Down	9.3099	0	1074	gi|337733630|gb|AEI72264.1|crustacean female sex hormonoe, partial [Carcinus maenas]	7e-10
male sterility domain-containing protein	comp122509_c1_seq1	934.795	7.07107	1862.52	263.4	8.04111	0.00691894	0.654786	Up	0.0826146	10.6794	4019	gi|242017448|ref|XP_002429200.1|male sterility domain-containing protein, putative [Pediculus humanus corporis]	8e-108	sp|A1ZAI5|FACR1_DROME	3e-115	Putative fatty acyl-CoA reductase CG5065 OS=Drosophila melanogaster GN=CG5065 PE=3 SV=1	KOG1221	8e-116	Acyl-CoA reductase	ko04146;ko00073;ko04212	Peroxisome|Cutin, suberine and wax biosynthesis|Longevity regulating pathway - worm	3	K13356	FAR	alcohol-forming fatty acyl-CoA reductase	GO:0016021;GO:0005778;GO:0005777;GO:0080019;GO:0050062;GO:0008611;GO:0035336;GO:0010025	integral component of membrane|peroxisomal membrane|peroxisome|fatty-acyl-CoA reductase (alcohol-forming) activity|long-chain-fatty-acyl-CoA reductase activity|ether lipid biosynthetic process|long-chain fatty-acyl-CoA metabolic process|wax biosynthetic process
male reproductive-related protein B	comp129936_c3_seq1	20549.6	41076.5	22.6274	0.00055086	-10.826	0.0265124	1	Down	1866.68	0.519841	991	gi|146432655|gb|ABQ41228.1|male reproductive-related protein B [Macrobrachium rosenbergii]	1e-53
male reproductive-related LIM protein	comp98075_c0_seq1	1209.86	2387.19	32.5269	0.0136256	-6.19754	0.0243247	1	Down	57.7017	0.398391	1863	gi|146432689|gb|ABQ41245.1|male reproductive-related LIM protein [Macrobrachium rosenbergii]	1e-34	sp|P53777|MLP1_DROME	7e-21	Muscle LIM protein 1 OS=Drosophila melanogaster GN=Mlp60A PE=2 SV=1	KOG1700	6e-20	Regulatory protein MLP and related LIM proteins							GO:0005634;GO:0030018;GO:0008270;GO:0030154;GO:0007517;GO:0060537	nucleus|Z disc|zinc ion binding|cell differentiation|muscle organ development|muscle tissue development
Myosin Va
Myosin regulatory light chain 2	comp117536_c0_seq1	924.542	1846.26	2.82843	0.00153198	-9.35039	0.00365667	0.480273	Down	61.5356	0.0490237	1351	gi|646699719|gb|KDR10217.1|Myosin regulatory light chain 2 [Zootermopsis nevadensis]	2e-51	sp|Q1HPS0|MLR_BOMMO	1e-56	Myosin regulatory light chain 2 OS=Bombyx mori PE=1 SV=1	KOG0031	2e-55	Myosin regulatory light chain, EF-Hand protein superfamily	ko04810;ko04510;ko04530;ko04611;ko04670	Regulation of actin cytoskeleton|Focal adhesion|Tight junction|Platelet activation|Leukocyte transendothelial migration	5	K12757	MYL12	myosin regulatory light chain 12	GO:0016459;GO:0005509	myosin complex|calcium ion binding
myosin heavy chain, muscle isoform X7	comp124626_c0_seq13	1234.61	2464.97	4.24264	0.00172117	-9.18239	0.00341794	0.468523	Down	13.4766	0.012509	8238	gi|913326127|ref|XP_013194457.1|PREDICTED: myosin heavy chain, muscle isoform X7 [Amyelois transitella]	0	sp|P05661|MYSA_DROME	0	Myosin heavy chain, muscle OS=Drosophila melanogaster GN=Mhc PE=1 SV=4	KOG0161	0	Myosin class II heavy chain	ko05416;ko04260;ko04261	Viral myocarditis|Cardiac muscle contraction|Adrenergic signaling in cardiomyocytes	3	K17751	MYH6_7	myosin heavy chain 6/7	GO:0031672;GO:0016459;GO:0032982;GO:0005703;GO:0030017;GO:0030898;GO:0005524;GO:0042623;GO:0003774;GO:0042803;GO:0008307;GO:0007527;GO:0007298;GO:0007427;GO:0060361;GO:0040011;GO:0042692;GO:0006936;GO:0007517;GO:0071689;GO:0030239;GO:0031033;GO:0050821;GO:0045214;GO:0030241	A band|myosin complex|myosin filament|polytene chromosome puff|sarcomere|actin-dependent ATPase activity|ATP binding|ATPase activity, coupled|motor activity|protein homodimerization activity|structural constituent of muscle|adult somatic muscle development|border follicle cell migration|epithelial cell migration, open tracheal system|flight|locomotion|muscle cell differentiation|muscle contractio…
Serine proteinase inhibitor	comp114693_c1_seq1	3775.95	2.82843	7549.07	2669	11.3821	0.00100193	0.33299	Up	0.0667865	101.3	1718	gi|1022765196|gb|KZS10461.1|putative Protein ACP24A4 [Daphnia magna]	6e-21	sp|O43278|SPIT1_HUMAN	2e-12	Kunitz-type protease inhibitor 1 OS=Homo sapiens GN=SPINT1 PE=1 SV=2	KOG4295	3e-13	Serine proteinase inhibitor (KU family)
	comp131459_c0_seq1	14795.1	4.94975	29585.3	5977.14	12.5452	0.00662447	0.640512	Up	0.109148	334.319	2040	gi|270046092|dbj|BAI50776.1|serine proteinase inhibitor [Marsupenaeus japonicus]	9e-75	sp|Q9CQV3|SPB11_MOUSE	3e-41	Serpin B11 OS=Mus musculus GN=Serpinb11 PE=2 SV=1	KOG2392	2e-36	Serpin	ko05146	Amoebiasis	1	K13963	SERPINB	serpin B	GO:0005737;GO:0005615;GO:0004867;GO:0010951	cytoplasm|extracellular space|serine-type endopeptidase inhibitor activity|negative regulation of endopeptidase activity
	comp121248_c0_seq1	3658.57	7290.27	26.8701	0.00368574	-8.08383	0.0082309	0.706668	Down	141.156	0.259498	2326	gi|494879550|gb|AGL39540.1|serine proteinase inhibitor [Litopenaeus vannamei]	1e-103	sp|P30740|ILEU_HUMAN	7e-47	Leukocyte elastase inhibitor OS=Homo sapiens GN=SERPINB1 PE=1 SV=1	KOG2392	2e-47	Serpin	ko05146	Amoebiasis	1	K13963	SERPINB	serpin B	GO:0005737;GO:0070062;GO:0005615;GO:0016020;GO:0004867;GO:0010951	cytoplasm|extracellular exosome|extracellular space|membrane|serine-type endopeptidase inhibitor activity|negative regulation of endopeptidase activity
serine proteinase inhibitor 8	comp124616_c0_seq19	3255.17	6476.39	33.9411	0.00524075	-7.57601	0.0108084	0.82481	Down	104.39	0.278623	2794	gi|288188858|gb|ADC42879.1|serine proteinase inhibitor 8 [Penaeus monodon]	3e-78	sp|Q4G075|ILEUA_RAT	1e-56	Leukocyte elastase inhibitor A OS=Rattus norvegicus GN=Serpinb1a PE=1 SV=1	KOG2392	1e-50	Serpin	ko05146	Amoebiasis	1	K13963	SERPINB	serpin B	GO:0005737;GO:0005615;GO:0004867;GO:0010951;GO:0042176	cytoplasm|extracellular space|serine-type endopeptidase inhibitor activity|negative regulation of endopeptidase activity|regulation of protein catabolic process
serine proteinase stubble isoform X2	comp110378_c0_seq1	22543.6	7.77817	45079.5	5795.64	12.5008	0.0177729	1	Up	0.142596	408.175	2546	gi|939668019|ref|XP_014281064.1|PREDICTED: serine proteinase stubble isoform X2 [Halyomorpha halys]	1e-20	sp|P33587|PROC_MOUSE	4e-12	Vitamin K-dependent protein C OS=Mus musculus GN=Proc PE=1 SV=2	KOG3627	2e-21	Trypsin	ko05146	Amoebiasis	1	K13963	SERPINB	serpin B	GO:0005737;GO:0005615;GO:0004867;GO:0010951	cytoplasm|extracellular space|serine-type endopeptidase inhibitor activity|negative regulation of endopeptidase activity
clip domain serine proteinase 1	comp123878_c1_seq3	726.552	23.3345	1429.77	61.2727	5.93717	0.0322918	1	Up	0.387777	12.3077	2677	gi|375173472|gb|AFA42359.1|clip domain serine proteinase 1 [Portunus trituberculatus]	5e-62	sp|B5U2W0|VSP_BOMIG	4e-42	Venom serine protease Bi-VSP OS=Bombus ignitus PE=1 SV=1	KOG3627	1e-40	Trypsin
Doublesex-mab3-related transcription factor	comp131814_c0_seq5	377.241	3.53553	750.947	212.4	7.73064	0.0158968	1	Up	0.0514872	5.14267	3367	gi|375173474|gb|AFA42360.1|clip domain serine proteinase 2 [Portunus trituberculatus]	4e-54	sp|P05049|SNAK_DROME	2e-23	Serine protease snake OS=Drosophila melanogaster GN=snk PE=1 SV=2	KOG3627	5e-24	Trypsin
Ubiquitin-related genes
Ubiquitin-associated and SH3 domain-containing protein A	comp118169_c0_seq1	5070.66	10134.3	7.07107	0.000697739	-10.485	0.00253584	0.410115	Down	259.012	0.0944211	1762	gi|7498700|pir||T15983hypothetical protein F09C12.2 - Caenorhabditis elegans	6e-14	sp|P57075|UBS3A_HUMAN	2e-09	Ubiquitin-associated and SH3 domain-containing protein A OS=Homo sapiens GN=UBASH3A PE=1 SV=1	KOG3734	3e-15	Predicted phosphoglycerate mutase							GO:0005829;GO:0070062;GO:0005634;GO:0050860;GO:0001817	cytosol|extracellular exosome|nucleus|negative regulation of T cell receptor signaling pathway|regulation of cytokine production
Ubiquitin mediated proteolysis	comp119843_c2_seq2	17766.8	38.1838	35495.3	929.593	9.86045	0.0285795	1	Up	2.26473	1072.44	763	gi|1005948721|ref|XP_015782678.1|PREDICTED: transcription elongation factor B polypeptide 1 [Tetranychus urticae]	4e-38	sp|P83941|ELOC_RAT	3e-46	Transcription elongation factor B polypeptide 1 OS=Rattus norvegicus GN=Tceb1 PE=1 SV=1	KOG3473	3e-47	RNA polymerase II transcription elongation factor Elongin/SIII, subunit elongin C	ko04066;ko04120;ko05200;ko05211	HIF-1 signaling pathway|Ubiquitin mediated proteolysis|Pathways in cancer|Renal cell carcinoma	4	K03872	TCEB1	transcription elongation factor B, polypeptide 1	GO:0070449;GO:0030891;GO:0032403;GO:0032968;GO:0042787;GO:0006351	elongin complex|VCB complex|protein complex binding|positive regulation of transcription elongation from RNA polymerase II promoter|protein ubiquitination involved in ubiquitin-dependent protein catabolic process|transcription, DNA-templated
E3 ubiquitin-protein ligase TRIM50	comp122942_c0_seq1	1188.29	2335.57	41.0122	0.0175598	-5.83158	0.0316173	1	Down	48.693	0.430284	2160	gi|761916940|ref|XP_011407445.1|PREDICTED: RING finger protein nhl-1-like [Amphimedon queenslandica]	1e-14	sp|Q86XT4|TRI50_HUMAN	2e-15	E3 ubiquitin-protein ligase TRIM50 OS=Homo sapiens GN=TRIM50 PE=1 SV=1	KOG2177	4e-16	Predicted E3 ubiquitin ligase							GO:0005737;GO:0016874;GO:0008270	cytoplasm|ligase activity|zinc ion binding
E3 ubiquitin ligase	comp131539_c0_seq1	3396.59	2.12132	6791.05	3201.33	11.6445	0.000797239	0.33299	Up	0.0299856	54.584	2868	gi|829186366|ref|XP_001470963.2|RING-type zinc-finger, LisH dimerization motif protein [Tetrahymena thermophila SB210]	5e-08				KOG2177	4e-06	Predicted E3 ubiquitin ligase
Ubiquitin-associated and SH3 domain-containing protein A	comp135822_c0_seq1	1936.41	3872.82	0	0	#NAME?	0.000491182	0.33299	Down	140.545	0	1241	gi|954562168|ref|XP_014604912.1|PREDICTED: protein UBASH3A homolog isoform X2 [Polistes canadensis]	1e-24	sp|P57075|UBS3A_HUMAN	2e-24	Ubiquitin-associated and SH3 domain-containing protein A OS=Homo sapiens GN=UBASH3A PE=1 SV=1	KOG3734	4e-25	Predicted phosphoglycerate mutase							GO:0005829;GO:0070062;GO:0005634;GO:0050860;GO:0001817	cytosol|extracellular exosome|nucleus|negative regulation of T cell receptor signaling pathway|regulation of cytokine production
Vitellogenin
vitellogenin receptor（VgR）	comp132489_c0_seq1	13512.5	94.0452	26930.9	286.361	8.16169	0.0374009	1	Up	0.715318	104.834	5922	gi|301070472|gb|ADK55596.1|vitellogenin receptor [Macrobrachium rosenbergii]	0	sp|P98163|YL_DROME	0	Putative vitellogenin receptor OS=Drosophila melanogaster GN=yl PE=1 SV=2	KOG1215	0	Low-density lipoprotein receptors containing Ca2+-binding EGF-like domains							GO:0030135;GO:0031410;GO:0016021;GO:0005886;GO:0005509;GO:0008196;GO:0048477;GO:0006898	coated vesicle|cytoplasmic vesicle|integral component of membrane|plasma membrane|calcium ion binding|vitellogenin receptor activity|oogenesis|receptor-mediated endocytosis
	comp128928_c0_seq5	10446.4	36.0624	20856.8	578.353	9.17581	0.0156782	1	Up	0.267072	79.0434	6083	gi|761383099|gb|AJP60220.1|vitellogenin receptor [Macrobrachium nipponense]	8e-81	sp|A2ARV4|LRP2_MOUSE	4e-58	Low-density lipoprotein receptor-related protein 2 OS=Mus musculus GN=Lrp2 PE=1 SV=1	KOG1215	5e-58	Low-density lipoprotein receptors containing Ca2+-binding EGF-like domains	ko04340;ko04918	Hedgehog signaling pathway|Thyroid hormone synthesis	2	K06233	LRP2	low density lipoprotein-related protein 2	GO:0045177;GO:0016324;GO:0005903;GO:0031526;GO:0005905;GO:0030139;GO:0005783;GO:0005768;GO:0070062;GO:0005794;GO:0016021;GO:0005765;GO:0016020;GO:0043235;GO:0005509;GO:0004872;GO:0042813;GO:0017147;GO:0060070;GO:0008283;GO:0030900;GO:0006898;GO:0006766;GO:0044332	apical part of cell|apical plasma membrane|brush border|brush border membrane|coated pit|endocytic vesicle|endoplasmic reticulum|endosome|extracellular exosome|Golgi apparatus|integral component of membrane|lysosomal membrane|membrane|receptor complex|calcium ion binding|receptor activity|Wnt-activated receptor activity|Wnt-protein binding|canonical Wnt signaling pathway|cell proliferation|forebr…
vitellogenin	comp134036_c0_seq1	804.334	1576.14	32.5269	0.0206371	-5.59862	0.0403315	1	Down	9.13454	0.0979423	7771	gi|42558189|dbj|BAD11098.1|vitellogenin [Pandalus hypsinotus]	0	sp|Q6RG02|VIT_FENME	0	Vitellogenin OS=Fenneropenaeus merguiensis PE=1 SV=2	KOG4338	2e-41	Predicted lipoprotein
	comp134036_c0_seq1	804.334	1576.14	32.5269	0.0206371	-5.59862	0.0403315	1	Down	9.13454	0.0979423	7771	gi|42558189|dbj|BAD11098.1|vitellogenin [Pandalus hypsinotus]	0	sp|Q6RG02|VIT_FENME	0	Vitellogenin OS=Fenneropenaeus merguiensis PE=1 SV=2	KOG4338	2e-41	Predicted lipoprotein
estrogen-related receptor (ERR)	comp126022_c0_seq1	3613.32	107.48	7119.15	66.2368	6.04956	0.0324612	1	Up	2.3485	79.3986	2067	gi|743692758|gb|AJC52502.1|estrogen sulfotransferase [Scylla olivacea]	1e-73	sp|O75897|ST1C4_HUMAN	1e-41	Sulfotransferase 1C4 OS=Homo sapiens GN=SULT1C4 PE=1 SV=2	KOG1584	2e-42	Sulfotransferase
adenylate cyclase type 9 (ADCY9)	comp56259_c0_seq1	345.068	4.67545	690.136	148.18	5.36575	0.00346454	0.471502	Up	2.64673	80.5293	1511	gi|170035719|ref|XP_001845715.1|adenylate cyclase [Culex quinquefasciatus]	1e-23				KOG2816	2e-25	Predicted transporter ADD1 (major facilitator superfamily)
gland hormone-like protein (MAL)	comp115299_c0_seq1	1953.03	4.24264	3901.82	919.667	9.84497	0.00185802	0.378845	Up	0.132462	62.1686	1447	gi|410934559|gb|AFV93996.1|membrane-anchored androgenic gland specific factor [Cherax quadricarinatus]	3e-17
crustacean female sex hormonoe (CFSH)	comp109085_c0_seq1	111.016	222.032	1.35679	0.00432566	-7.21796	0.0491365	1	Down	39.3099	0.00345316	1074	gi|337733630|gb|AEI72264.1|crustacean female sex hormonoe, partial [Carcinus maenas]	7e-10
neuroparsin (NP)	comp130758_c1_seq1	3193.29	89.0955	6297.49	70.6825	6.14328	0.0287522	1	Up	3.78418	136.837	1061	gi|614461329|gb|AHX39208.1|neuroparsin [Metapenaeus ensis]	4e-29	sp|P10776|NPAB_LOCMI	4e-11	Neuroparsin-A OS=Locusta migratoria PE=1 SV=3
