# Supplementary material
Source: MDPI journal article supplement (https://www.mdpi.com/2077-1312/10/6/737)
Supplement: s1 [file s1 › Table S7.xlsx]

## Sheet: KEGG signaling pathway of DEGs
id	term	ListHits	ListTotal	PopHits	PopTotal	pval	padj	Enrichment_score	Gene
ko04212	Longevity regulating pathway - worm	8	124	68	5342	2.27231e-05	0.00522632	5.06831	comp112506_c0_seq1; comp119631_c0_seq1; comp134219_c0_seq1; comp122509_c1_seq1; comp132702_c0_seq3; comp116261_c0_seq1; comp125948_c0_seq1; comp121028_c0_seq2
ko04142	Lysosome	13	124	187	5342	9.42043e-05	0.0108335	2.99491	comp108551_c0_seq1; comp130639_c0_seq18; comp122809_c0_seq1; comp105209_c1_seq1; comp123066_c0_seq1; comp126601_c0_seq1; comp123201_c0_seq4; comp128383_c0_seq1; comp121660_c0_seq1; comp121742_c1_seq1; comp116202_c0_seq1; comp104643_c0_seq1; comp125672_c2_seq1
ko00604	Glycosphingolipid biosynthesis - ganglio series	3	124	15	5342	0.000309635	0.0237387	8.61613	comp130639_c0_seq18; comp123066_c0_seq1; comp126601_c0_seq1
ko04139	Mitophagy - yeast	3	124	19	5342	0.000818135	0.0470428	6.80221	comp119631_c0_seq1; comp116261_c0_seq1; comp125948_c0_seq1
ko04610	Complement and coagulation cascades	3	124	21	5342	0.00121871	0.0497199	6.15438	comp130606_c0_seq1; comp117312_c0_seq2; comp135589_c0_seq2
ko04140	Autophagy - animal	8	124	115	5342	0.00129704	0.0497199	2.99691	comp108551_c0_seq1; comp119631_c0_seq1; comp117864_c0_seq1; comp121660_c0_seq1; comp116261_c0_seq1; comp125948_c0_seq1; comp121028_c0_seq2; comp104643_c0_seq1
ko00073	Cutin, suberine and wax biosynthesis	1	124	3	5342	0.00157927	0.0518903	14.3602	comp122509_c1_seq1
ko00100	Steroid biosynthesis	2	124	13	5342	0.00294493	0.0754613	6.62779	comp114565_c0_seq1; comp112549_c0_seq1
ko00511	Other glycan degradation	4	124	43	5342	0.00295283	0.0754613	4.0075	comp130639_c0_seq18; comp123066_c0_seq1; comp126601_c0_seq1; comp128383_c0_seq1
ko04727	GABAergic synapse	5	124	65	5342	0.00373901	0.0773625	3.3139	comp104720_c0_seq1; comp119631_c0_seq1; comp127394_c0_seq2; comp116261_c0_seq1; comp125948_c0_seq1
ko05166	HTLV-I infection	9	124	161	5342	0.0039724	0.0773625	2.40823	comp127235_c0_seq1; comp125964_c0_seq1; comp91391_c0_seq1; comp119603_c0_seq1; comp119387_c0_seq1; comp124139_c0_seq1; comp125429_c0_seq3; comp127379_c0_seq1; comp111033_c0_seq1
ko04914	Progesterone-mediated oocyte maturation	5	124	66	5342	0.00403631	0.0773625	3.26369	comp127235_c0_seq1; comp125964_c0_seq1; comp119387_c0_seq1; comp124361_c0_seq2; comp127379_c0_seq1
ko04068	FoxO signaling pathway	6	124	90	5342	0.00464609	0.0822	2.87204	comp119631_c0_seq1; comp124361_c0_seq2; comp132702_c0_seq3; comp116261_c0_seq1; comp125948_c0_seq1; comp121028_c0_seq2
ko04113	Meiosis - yeast	4	124	50	5342	0.00571318	0.0938593	3.44645	comp127235_c0_seq1; comp125964_c0_seq1; comp119387_c0_seq1; comp127379_c0_seq1
ko04978	Mineral absorption	3	124	33	5342	0.00672329	0.10309	3.91642	comp129926_c0_seq1; comp39440_c0_seq1; comp115100_c0_seq2
ko04972	Pancreatic secretion	6	124	107	5342	0.0117389	0.156153	2.41574	comp127397_c0_seq1; comp134511_c0_seq4; comp128267_c0_seq6; comp134553_c0_seq1; comp122176_c1_seq1; comp119423_c0_seq2
ko00910	Nitrogen metabolism	2	124	21	5342	0.011963	0.156153	4.10292	comp127394_c0_seq2; comp110696_c0_seq1
ko00300	Lysine biosynthesis	1	124	8	5342	0.0136567	0.156153	5.38508	comp130351_c0_seq3
ko04114	Oocyte meiosis	5	124	86	5342	0.0143613	0.156153	2.50469	comp127235_c0_seq1; comp125964_c0_seq1; comp119387_c0_seq1; comp125266_c0_seq6; comp127379_c0_seq1
ko04111	Cell cycle - yeast	4	124	63	5342	0.0149356	0.156153	2.73528	comp127235_c0_seq1; comp125964_c0_seq1; comp119387_c0_seq1; comp127379_c0_seq1
ko04621	NOD-like receptor signaling pathway	4	124	63	5342	0.0149356	0.156153	2.73528	comp119631_c0_seq1; comp117864_c0_seq1; comp116261_c0_seq1; comp125948_c0_seq1
ko00603	Glycosphingolipid biosynthesis - globo and isoglobo series	2	124	23	5342	0.015403	0.156153	3.74614	comp123066_c0_seq1; comp126601_c0_seq1
ko00531	Glycosaminoglycan degradation	3	124	42	5342	0.0156759	0.156153	3.07719	comp130639_c0_seq18; comp123066_c0_seq1; comp126601_c0_seq1
ko04970	Salivary secretion	4	124	65	5342	0.0169223	0.156153	2.65112	comp110021_c0_seq1; comp134553_c0_seq1; comp122176_c1_seq1; comp125266_c0_seq6
ko02024	Quorum sensing	1	124	9	5342	0.0172941	0.156153	4.78674	comp131818_c0_seq5
ko04520	Adherens junction	5	124	90	5342	0.0176521	0.156153	2.39337	comp115013_c1_seq5; comp121016_c0_seq5; comp117864_c0_seq1; comp119876_c0_seq1; comp132702_c0_seq3
ko04120	Ubiquitin mediated proteolysis	6	124	119	5342	0.0200962	0.17119	2.17213	comp127235_c0_seq1; comp125964_c0_seq1; comp125174_c0_seq1; comp119387_c0_seq1; comp119843_c2_seq2; comp127379_c0_seq1
ko00600	Sphingolipid metabolism	3	124	46	5342	0.0212957	0.173554	2.80961	comp130639_c0_seq18; comp120390_c0_seq1; comp130456_c0_seq2
ko04110	Cell cycle	5	124	95	5342	0.0224522	0.173554	2.2674	comp127235_c0_seq1; comp125964_c0_seq1; comp119387_c0_seq1; comp124361_c0_seq2; comp127379_c0_seq1
ko04512	ECM-receptor interaction	4	124	70	5342	0.0226374	0.173554	2.46175	comp124889_c0_seq1; comp117312_c0_seq2; comp77256_c0_seq1; comp135589_c0_seq2
ko04744	Phototransduction	1	124	11	5342	0.0256336	0.188508	3.91642	comp125266_c0_seq6
ko00515	Mannose type O-glycan biosyntheis	3	124	49	5342	0.0262272	0.188508	2.63759	comp126566_c1_seq2; comp129052_c0_seq8; comp123343_c0_seq2
ko04670	Leukocyte transendothelial migration	4	124	75	5342	0.0294796	0.203113	2.29763	comp115013_c1_seq5; comp121016_c0_seq5; comp117536_c0_seq1; comp119876_c0_seq1
ko00062	Fatty acid elongation	2	124	30	5342	0.0314108	0.203113	2.87204	comp124924_c0_seq1; comp110935_c0_seq5
ko04630	Jak-STAT signaling pathway	2	124	30	5342	0.0314108	0.203113	2.87204	comp125174_c0_seq1; comp104073_c0_seq1
ko04924	Renin secretion	3	124	52	5342	0.0317916	0.203113	2.48542	comp134553_c0_seq1; comp122176_c1_seq1; comp125266_c0_seq6
ko05213	Endometrial cancer	2	124	31	5342	0.0342023	0.207014	2.7794	comp115013_c1_seq5; comp121028_c0_seq2
ko05214	Glioma	2	124	31	5342	0.0342023	0.207014	2.7794	comp125266_c0_seq6; comp121028_c0_seq2
ko00981	Insect hormone biosynthesis	2	124	32	5342	0.0371183	0.218497	2.69254	comp134219_c0_seq1; comp109070_c1_seq1
ko00260	Glycine, serine and threonine metabolism	3	124	55	5342	0.0379995	0.218497	2.34985	comp116880_c0_seq1; comp133317_c0_seq12; comp126312_c0_seq1
ko05146	Amoebiasis	3	124	56	5342	0.0402129	0.221411	2.30789	comp121248_c0_seq1; comp124616_c0_seq19; comp131459_c0_seq1
ko05152	Tuberculosis	4	124	83	5342	0.0429097	0.221411	2.07618	comp108551_c0_seq1; comp119854_c0_seq1; comp125266_c0_seq6; comp104643_c0_seq1
ko04962	Vasopressin-regulated water reabsorption	2	124	34	5342	0.0433196	0.221411	2.53416	comp110021_c0_seq1; comp105885_c0_seq3
ko04975	Fat digestion and absorption	2	124	34	5342	0.0433196	0.221411	2.53416	comp127397_c0_seq1; comp134511_c0_seq4
ko04115	p53 signaling pathway	2	124	34	5342	0.0433196	0.221411	2.53416	comp124361_c0_seq2; comp121028_c0_seq2
ko04974	Protein digestion and absorption	3	124	58	5342	0.0448562	0.224281	2.22831	comp128267_c0_seq6; comp115100_c0_seq2; comp119423_c0_seq2
ko00520	Amino sugar and nucleotide sugar metabolism	4	124	85	5342	0.0467597	0.224733	2.02732	comp54356_c0_seq1; comp123066_c0_seq1; comp126601_c0_seq1; comp126021_c0_seq5
ko04745	Phototransduction - fly	3	124	59	5342	0.0472861	0.224733	2.19054	comp121016_c0_seq5; comp125266_c0_seq6; comp100130_c0_seq1
ko05205	Proteoglycans in cancer	8	124	205	5342	0.0478779	0.224733	1.6812	comp121016_c0_seq5; comp91391_c0_seq1; comp105209_c1_seq1; comp119876_c0_seq1; comp121660_c0_seq1; comp121742_c1_seq1; comp133303_c0_seq29; comp116202_c0_seq1
ko04022	cGMP - PKG signaling pathway	5	124	115	5342	0.0502116	0.230973	1.87307	comp134553_c0_seq1; comp122176_c1_seq1; comp125266_c0_seq6; comp123741_c0_seq2; comp132702_c0_seq3
ko00061	Fatty acid biosynthesis	1	124	16	5342	0.0518772	0.233956	2.69254	comp131818_c0_seq5
ko00982	Drug metabolism - cytochrome P450	2	124	37	5342	0.0535254	0.236747	2.32868	comp129421_c0_seq3; comp114807_c0_seq1
ko04071	Sphingolipid signaling pathway	4	124	90	5342	0.0572604	0.246704	1.9147	comp108551_c0_seq1; comp120390_c0_seq1; comp130456_c0_seq2; comp121028_c0_seq2
ko05218	Melanoma	1	124	17	5342	0.0579217	0.246704	2.53416	comp121028_c0_seq2
ko00980	Metabolism of xenobiotics by cytochrome P450	2	124	39	5342	0.0609133	0.252273	2.20926	comp129421_c0_seq3; comp114807_c0_seq1
ko05418	Fluid shear stress and atherosclerosis	5	124	121	5342	0.0614229	0.252273	1.78019	comp121016_c0_seq5; comp117864_c0_seq1; comp125266_c0_seq6; comp121660_c0_seq1; comp114807_c0_seq1
ko04622	RIG-I-like receptor signaling pathway	1	124	18	5342	0.0641969	0.25904	2.39337	comp117864_c0_seq1
ko05204	Chemical carcinogenesis	2	124	41	5342	0.0687514	0.269185	2.10149	comp129421_c0_seq3; comp114807_c0_seq1
ko04138	Autophagy - yeast	3	124	68	5342	0.0723639	0.269185	1.90062	comp119631_c0_seq1; comp116261_c0_seq1; comp125948_c0_seq1
ko00250	Alanine, aspartate and glutamate metabolism	2	124	42	5342	0.0728341	0.269185	2.05146	comp127394_c0_seq2; comp116880_c0_seq1
ko02020	Two-component system	2	124	43	5342	0.0770231	0.269185	2.00375	comp127394_c0_seq2; comp129544_c0_seq1
ko00900	Terpenoid backbone biosynthesis	1	124	20	5342	0.0773846	0.269185	2.15403	comp99579_c0_seq1
ko04964	Proximal tubule bicarbonate reclamation	1	124	20	5342	0.0773846	0.269185	2.15403	comp115100_c0_seq2
ko00513	Various types of N-glycan biosynthesis	3	124	71	5342	0.0819746	0.269185	1.82031	comp125084_c1_seq1; comp123066_c0_seq1; comp126601_c0_seq1
ko04722	Neurotrophin signaling pathway	3	124	71	5342	0.0819746	0.269185	1.82031	comp119992_c0_seq2; comp119876_c0_seq1; comp125266_c0_seq6
ko04510	Focal adhesion	6	124	163	5342	0.0837615	0.269185	1.58579	comp121016_c0_seq5; comp117312_c0_seq2; comp117536_c0_seq1; comp119876_c0_seq1; comp135589_c0_seq2; comp121028_c0_seq2
ko04064	NF-kappa B signaling pathway	1	124	21	5342	0.0842711	0.269185	2.05146	comp117864_c0_seq1
ko05221	Acute myeloid leukemia	1	124	21	5342	0.0842711	0.269185	2.05146	comp104073_c0_seq1
ko04350	TGF-beta signaling pathway	2	124	45	5342	0.0857108	0.269185	1.9147	comp53390_c0_seq1; comp125981_c0_seq1
ko04660	T cell receptor signaling pathway	2	124	45	5342	0.0857108	0.269185	1.9147	comp117864_c0_seq1; comp119876_c0_seq1
ko04550	Signaling pathways regulating pluripotency of stem cells	3	124	73	5342	0.0887156	0.269185	1.77044	comp91391_c0_seq1; comp53390_c0_seq1; comp129756_c0_seq2
ko00983	Drug metabolism - other enzymes	2	124	46	5342	0.0902049	0.269185	1.87307	comp129421_c0_seq3; comp125653_c0_seq7
ko04371	Apelin signaling pathway	4	124	103	5342	0.0903907	0.269185	1.67303	comp119631_c0_seq1; comp125266_c0_seq6; comp116261_c0_seq1; comp125948_c0_seq1
ko04016	MAPK signaling pathway - plant	1	124	22	5342	0.0913361	0.269185	1.95821	comp125266_c0_seq6
ko05322	Systemic lupus erythematosus	1	124	22	5342	0.0913361	0.269185	1.95821	comp92762_c0_seq1
ko04911	Insulin secretion	3	124	74	5342	0.092184	0.269185	1.74651	comp110021_c0_seq1; comp134553_c0_seq1; comp122176_c1_seq1
ko04933	AGE-RAGE signaling pathway in diabetic complications	2	124	47	5342	0.0947959	0.269185	1.83322	comp119876_c0_seq1; comp104073_c0_seq1
ko05211	Renal cell carcinoma	2	124	47	5342	0.0947959	0.269185	1.83322	comp119876_c0_seq1; comp119843_c2_seq2
ko04611	Platelet activation	4	124	105	5342	0.0962175	0.269185	1.64117	comp121016_c0_seq5; comp117312_c0_seq2; comp117536_c0_seq1; comp135589_c0_seq2
ko00512	Mucin type O-glycan biosynthesis	1	124	23	5342	0.0985679	0.269185	1.87307	comp132652_c0_seq1
ko05033	Nicotine addiction	1	124	23	5342	0.0985679	0.269185	1.87307	comp104720_c0_seq1
ko05020	Prion diseases	1	124	23	5342	0.0985679	0.269185	1.87307	comp105620_c0_seq1
ko01210	2-Oxocarboxylic acid metabolism	1	124	23	5342	0.0985679	0.269185	1.87307	comp130351_c0_seq3
ko05140	Leishmaniasis	1	124	23	5342	0.0985679	0.269185	1.87307	comp117864_c0_seq1
ko03320	PPAR signaling pathway	2	124	48	5342	0.0994814	0.269185	1.79503	comp112506_c0_seq1; comp131818_c0_seq5
ko04130	SNARE interactions in vesicular transport	1	124	24	5342	0.105955	0.273816	1.79503	comp110021_c0_seq1
ko00627	Aminobenzoate degradation	1	124	24	5342	0.105955	0.273816	1.79503	comp129544_c0_seq1
ko04626	Plant-pathogen interaction	1	124	24	5342	0.105955	0.273816	1.79503	comp125266_c0_seq6
ko04960	Aldosterone-regulated sodium reabsorption	1	124	24	5342	0.105955	0.273816	1.79503	comp132702_c0_seq3
ko01040	Biosynthesis of unsaturated fatty acids	1	124	25	5342	0.113486	0.29002	1.72323	comp112506_c0_seq1
ko05100	Bacterial invasion of epithelial cells	3	124	81	5342	0.118211	0.296964	1.59558	comp115013_c1_seq5; comp121016_c0_seq5; comp119876_c0_seq1
ko05032	Morphine addiction	2	124	52	5342	0.119117	0.296964	1.65695	comp104720_c0_seq1; comp123086_c0_seq1
ko00730	Thiamine metabolism	1	124	26	5342	0.121151	0.296964	1.65695	comp129544_c0_seq1
ko04390	Hippo signaling pathway	4	124	113	5342	0.121368	0.296964	1.52498	comp115013_c1_seq5; comp121016_c0_seq5; comp91391_c0_seq1; comp53390_c0_seq1
ko04913	Ovarian Steroidogenesis	1	124	27	5342	0.12894	0.312055	1.59558	comp132702_c0_seq3
ko04270	Vascular smooth muscle contraction	3	124	84	5342	0.130249	0.312055	1.53859	comp134553_c0_seq1; comp122176_c1_seq1; comp125266_c0_seq6
ko04152	AMPK signaling pathway	3	124	85	5342	0.134372	0.314739	1.52049	comp112506_c0_seq1; comp117864_c0_seq1; comp132702_c0_seq3
ko05416	Viral myocarditis	2	124	55	5342	0.134711	0.314739	1.56657	comp121016_c0_seq5; comp124626_c0_seq13
ko00601	Glycosphingolipid biosynthesis - lacto and neolacto series	1	124	28	5342	0.136843	0.314739	1.53859	comp113154_c0_seq1
ko04930	Type II diabetes mellitus	1	124	28	5342	0.136843	0.314739	1.53859	comp132702_c0_seq3
ko00561	Glycerolipid metabolism	2	124	56	5342	0.14006	0.318949	1.53859	comp127397_c0_seq1; comp134511_c0_seq4
ko00140	Steroid hormone biosynthesis	1	124	29	5342	0.14485	0.323452	1.48554	comp129421_c0_seq3
ko04614	Renin-angiotensin system	1	124	29	5342	0.14485	0.323452	1.48554	comp123201_c0_seq4
ko05164	Influenza A	4	124	121	5342	0.149281	0.325733	1.42415	comp117829_c0_seq1; comp121016_c0_seq5; comp130478_c0_seq3; comp119423_c0_seq2
ko01212	Fatty acid metabolism	2	124	58	5342	0.150969	0.325733	1.48554	comp112506_c0_seq1; comp131818_c0_seq5
ko00053	Ascorbate and aldarate metabolism	1	124	30	5342	0.152953	0.325733	1.43602	comp129421_c0_seq3
ko04740	Olfactory transduction	1	124	30	5342	0.152953	0.325733	1.43602	comp125266_c0_seq6
ko00532	Glycosaminoglycan biosynthesis - chondroitin sulfate / dermatan sulfate	1	124	30	5342	0.152953	0.325733	1.43602	comp124673_c0_seq1
ko04380	Osteoclast differentiation	1	124	31	5342	0.161143	0.333899	1.3897	comp117864_c0_seq1
ko04620	Toll-like receptor signaling pathway	1	124	31	5342	0.161143	0.333899	1.3897	comp117864_c0_seq1
ko05230	Central carbon metabolism in cancer	1	124	31	5342	0.161143	0.333899	1.3897	comp121028_c0_seq2
ko05224	Breast cancer	2	124	62	5342	0.173555	0.348089	1.3897	comp91391_c0_seq1; comp121028_c0_seq2
ko00052	Galactose metabolism	1	124	33	5342	0.17775	0.348089	1.30547	comp130639_c0_seq18
ko05212	Pancreatic cancer	1	124	33	5342	0.17775	0.348089	1.30547	comp119876_c0_seq1
ko00790	Folate biosynthesis	1	124	33	5342	0.17775	0.348089	1.30547	comp129544_c0_seq1
ko04918	Thyroid hormone synthesis	2	124	63	5342	0.179347	0.348089	1.36764	comp125513_c0_seq1; comp128928_c0_seq5
ko04066	HIF-1 signaling pathway	2	124	63	5342	0.179347	0.348089	1.36764	comp119843_c2_seq2; comp132702_c0_seq3
ko04916	Melanogenesis	2	124	64	5342	0.185191	0.348089	1.34627	comp91391_c0_seq1; comp125266_c0_seq6
ko04612	Antigen processing and presentation	2	124	64	5342	0.185191	0.348089	1.34627	comp122809_c0_seq1; comp121660_c0_seq1
ko00220	Arginine biosynthesis	1	124	34	5342	0.186152	0.348089	1.26708	comp127394_c0_seq2
ko04011	MAPK signaling pathway - yeast	1	124	34	5342	0.186152	0.348089	1.26708	comp119876_c0_seq1
ko04370	VEGF signaling pathway	1	124	34	5342	0.186152	0.348089	1.26708	comp119876_c0_seq1
ko01521	EGFR tyrosine kinase inhibitor resistance	1	124	34	5342	0.186152	0.348089	1.26708	comp121028_c0_seq2
ko04146	Peroxisome	3	124	98	5342	0.192394	0.356859	1.3188	comp105620_c0_seq1; comp122509_c1_seq1; comp131818_c0_seq5
ko00860	Porphyrin and chlorophyll metabolism	1	124	35	5342	0.194609	0.358081	1.23088	comp129421_c0_seq3
ko04657	IL-17 signaling pathway	1	124	36	5342	0.203116	0.367847	1.19668	comp117864_c0_seq1
ko00830	Retinol metabolism	1	124	36	5342	0.203116	0.367847	1.19668	comp129421_c0_seq3
ko05412	Arrhythmogenic right ventricular cardiomyopathy (ARVC)	2	124	68	5342	0.209045	0.375628	1.26708	comp115013_c1_seq5; comp121016_c0_seq5
ko05217	Basal cell carcinoma	1	124	37	5342	0.211664	0.377385	1.16434	comp91391_c0_seq1
ko05134	Legionellosis	2	124	69	5342	0.215116	0.377684	1.24871	comp121287_c0_seq1; comp83381_c0_seq1
ko05034	Alcoholism	2	124	69	5342	0.215116	0.377684	1.24871	comp125266_c0_seq6; comp92762_c0_seq1
ko00380	Tryptophan metabolism	1	124	39	5342	0.22886	0.387769	1.10463	comp130351_c0_seq3
ko03410	Base excision repair	1	124	39	5342	0.22886	0.387769	1.10463	comp135770_c0_seq1
ko05133	Pertussis	1	124	39	5342	0.22886	0.387769	1.10463	comp125266_c0_seq6
ko04923	Regulation of lipolysis in adipocyte	1	124	39	5342	0.22886	0.387769	1.10463	comp132702_c0_seq3
ko04070	Phosphatidylinositol signaling system	2	124	72	5342	0.233543	0.387769	1.19668	comp125266_c0_seq6; comp121028_c0_seq2
ko04976	Bile secretion	1	124	40	5342	0.237496	0.387769	1.07702	comp115100_c0_seq2
ko00310	Lysine degradation	4	124	143	5342	0.237679	0.387769	1.20505	comp98100_c0_seq1; comp131464_c0_seq1; comp130351_c0_seq3; comp126309_c0_seq16
ko05131	Shigellosis	2	124	73	5342	0.23975	0.387769	1.18029	comp121016_c0_seq5; comp119876_c0_seq1
ko04931	Insulin resistance	2	124	73	5342	0.23975	0.387769	1.18029	comp132702_c0_seq3; comp121028_c0_seq2
ko04150	mTOR signaling pathway	3	124	108	5342	0.241495	0.387769	1.19668	comp91391_c0_seq1; comp132702_c0_seq3; comp121028_c0_seq2
ko05132	Salmonella infection	2	124	74	5342	0.245985	0.387769	1.16434	comp121016_c0_seq5; comp119876_c0_seq1
ko04912	GnRH signaling pathway	2	124	74	5342	0.245985	0.387769	1.16434	comp119876_c0_seq1; comp125266_c0_seq6
ko04668	TNF signaling pathway	1	124	41	5342	0.246149	0.387769	1.05075	comp117864_c0_seq1
ko05323	Rheumatoid arthritis	1	124	41	5342	0.246149	0.387769	1.05075	comp121660_c0_seq1
ko01524	Platinum drug resistance	1	124	41	5342	0.246149	0.387769	1.05075	comp114807_c0_seq1
ko04977	Vitamin digestion and absorption	1	124	42	5342	0.254815	0.39869	1.02573	comp134511_c0_seq4
ko04971	Gastric acid secretion	1	124	43	5342	0.263488	0.409474	1.00188	comp125266_c0_seq6
ko05160	Hepatitis C	1	124	44	5342	0.272162	0.411825	0.979106	comp125174_c0_seq1
ko04340	Hedgehog signaling pathway	1	124	44	5342	0.272162	0.411825	0.979106	comp128928_c0_seq5
ko00040	Pentose and glucuronate interconversions	1	124	44	5342	0.272162	0.411825	0.979106	comp129421_c0_seq3
ko04920	Adipocytokine signaling pathway	1	124	44	5342	0.272162	0.411825	0.979106	comp131818_c0_seq5
ko04726	Serotonergic synapse	1	124	45	5342	0.280835	0.419428	0.957348	comp104720_c0_seq1
ko00630	Glyoxylate and dicarboxylate metabolism	1	124	45	5342	0.280835	0.419428	0.957348	comp127394_c0_seq2
ko05014	Amyotrophic lateral sclerosis (ALS)	1	124	46	5342	0.2895	0.422496	0.936536	comp105620_c0_seq1
ko00270	Cysteine and methionine metabolism	1	124	46	5342	0.2895	0.422496	0.936536	comp116880_c0_seq1
ko05202	Transcriptional misregulation in cancers	2	124	81	5342	0.290237	0.422496	1.06372	comp53390_c0_seq1; comp92762_c0_seq1
ko05145	Toxoplasmosis	2	124	81	5342	0.290237	0.422496	1.06372	comp117864_c0_seq1; comp123741_c0_seq2
ko05168	Herpes simplex infection	2	124	82	5342	0.296619	0.429071	1.05075	comp117864_c0_seq1; comp125339_c1_seq1
ko05215	Prostate cancer	1	124	48	5342	0.306791	0.436589	0.897513	comp121028_c0_seq2
ko04015	Rap1 signaling pathway	4	124	159	5342	0.30928	0.436589	1.08379	comp121016_c0_seq5; comp119876_c0_seq1; comp125266_c0_seq6; comp132702_c0_seq3
ko04213	Longevity regulating pathway - multiple species	2	124	84	5342	0.309409	0.436589	1.02573	comp105620_c0_seq1; comp132702_c0_seq3
ko03008	Ribosome biogenesis in eukaryotes	2	124	84	5342	0.309409	0.436589	1.02573	comp127673_c0_seq2; comp134598_c0_seq1
ko04720	Long-term potentiation	1	124	49	5342	0.315409	0.439662	0.879197	comp125266_c0_seq6
ko04750	Inflammatory mediator regulation of TRP channels	1	124	49	5342	0.315409	0.439662	0.879197	comp125266_c0_seq6
ko04721	Synaptic vesicle cycle	1	124	50	5342	0.324005	0.444668	0.861613	comp110021_c0_seq1
ko05031	Amphetamine addiction	1	124	50	5342	0.324005	0.444668	0.861613	comp125266_c0_seq6
ko04810	Regulation of actin cytoskeleton	3	124	124	5342	0.324801	0.444668	1.04227	comp121016_c0_seq5; comp117536_c0_seq1; comp119876_c0_seq1
ko04624	Toll and Imd signaling pathway	2	124	87	5342	0.328629	0.447246	0.99036	comp117864_c0_seq1; comp133303_c0_seq29
ko04723	Retrograde endocannabinoid signaling	1	124	51	5342	0.332573	0.44732	0.844719	comp104720_c0_seq1
ko04666	Fc gamma R-mediated phagocytosis	1	124	51	5342	0.332573	0.44732	0.844719	comp119876_c0_seq1
ko04210	Apoptosis	3	124	126	5342	0.335426	0.448535	1.02573	comp108551_c0_seq1; comp121016_c0_seq5; comp121660_c0_seq1
ko05120	Epithelial cell signaling in Helicobacter pylori infection	1	124	52	5342	0.341111	0.4535	0.828474	comp119876_c0_seq1
ko04310	Wnt signaling pathway	2	124	90	5342	0.347846	0.458588	0.957348	comp91391_c0_seq1; comp117864_c0_seq1
ko00280	Valine, leucine and isoleucine degradation	1	124	53	5342	0.349616	0.458588	0.812842	comp116880_c0_seq1
ko04145	Phagosome	4	124	168	5342	0.350919	0.458588	1.02573	comp121016_c0_seq5; comp119854_c0_seq1; comp121660_c0_seq1; comp104643_c0_seq1
ko03013	RNA transport	4	124	169	5342	0.355575	0.460109	1.01966	comp121287_c0_seq1; comp83381_c0_seq1; comp125339_c1_seq1; comp135515_c0_seq4
ko04014	Ras signaling pathway	3	124	130	5342	0.35672	0.460109	0.994169	comp119876_c0_seq1; comp125266_c0_seq6; comp132702_c0_seq3
ko00071	Fatty acid degradation	1	124	54	5342	0.358085	0.460109	0.79779	comp131818_c0_seq5
ko04010	MAPK signaling pathway	3	124	131	5342	0.362047	0.462615	0.98658	comp117864_c0_seq1; comp119876_c0_seq1; comp110231_c0_seq1
ko05130	Pathogenic Escherichia coli infection	2	124	93	5342	0.367016	0.466374	0.926465	comp121016_c0_seq5; comp119876_c0_seq1
ko04151	PI3K-Akt signaling pathway	4	124	173	5342	0.374221	0.468626	0.996084	comp117312_c0_seq2; comp132702_c0_seq3; comp135589_c0_seq2; comp121028_c0_seq2
ko00562	Inositol phosphate metabolism	1	124	56	5342	0.374901	0.468626	0.769297	comp121028_c0_seq2
ko05161	Hepatitis B	1	124	56	5342	0.374901	0.468626	0.769297	comp121028_c0_seq2
ko04910	Insulin signaling pathway	2	124	95	5342	0.379748	0.472119	0.906961	comp125266_c0_seq6; comp132702_c0_seq3
ko04925	Aldosterone synthesis and secretion	1	124	60	5342	0.40798	0.501793	0.718011	comp125266_c0_seq6
ko05222	Small cell lung cancer	1	124	60	5342	0.40798	0.501793	0.718011	comp121028_c0_seq2
ko05200	Pathways in cancer	5	124	222	5342	0.411665	0.502854	0.970285	comp115013_c1_seq5; comp91391_c0_seq1; comp119876_c0_seq1; comp119843_c2_seq2; comp121028_c0_seq2
ko05162	Measles	1	124	61	5342	0.416121	0.502854	0.70624	comp117864_c0_seq1
ko01230	Biosynthesis of amino acids	2	124	101	5342	0.417587	0.502854	0.853082	comp127394_c0_seq2; comp130351_c0_seq3
ko05206	MicroRNAs in cancer	2	124	101	5342	0.417587	0.502854	0.853082	comp104073_c0_seq1; comp121028_c0_seq2
ko00480	Glutathione metabolism	1	124	62	5342	0.424206	0.508164	0.694849	comp114807_c0_seq1
ko00330	Arginine and proline metabolism	1	124	63	5342	0.432235	0.514541	0.68382	comp122911_c0_seq3
ko04080	Neuroactive ligand-receptor interaction	2	124	104	5342	0.436241	0.514541	0.828474	comp104720_c0_seq1; comp119423_c0_seq2
ko04391	Hippo signaling pathway -fly	2	124	104	5342	0.436241	0.514541	0.828474	comp121016_c0_seq5; comp53390_c0_seq1
ko04261	Adrenergic signaling in cardiomyocytes	2	124	106	5342	0.448556	0.526367	0.812842	comp124626_c0_seq13; comp125266_c0_seq6
ko04211	Longevity regulating pathway - mammal	1	124	66	5342	0.455959	0.532337	0.652737	comp132702_c0_seq3
ko04728	Dopaminergic synapse	1	124	67	5342	0.463741	0.53869	0.642995	comp125266_c0_seq6
ko05110	Vibrio cholerae infection	1	124	69	5342	0.479112	0.553747	0.624357	comp121016_c0_seq5
ko04922	Glucagon signaling pathway	1	124	70	5342	0.486697	0.558007	0.615438	comp125266_c0_seq6
ko04530	Tight junction	3	124	155	5342	0.48765	0.558007	0.833819	comp121016_c0_seq5; comp117536_c0_seq1; comp119876_c0_seq1
ko04020	Calcium signaling pathway	2	124	113	5342	0.490773	0.558801	0.762489	comp125266_c0_seq6; comp123741_c0_seq2
ko04724	Glutamatergic synapse	1	124	74	5342	0.516346	0.585022	0.582171	comp127394_c0_seq2
ko04360	Axon guidance	2	124	118	5342	0.51996	0.58623	0.73018	comp91391_c0_seq1; comp119876_c0_seq1
ko04062	Chemokine signaling pathway	1	124	76	5342	0.530745	0.59547	0.566851	comp119876_c0_seq1
ko00230	Purine metabolism	3	124	168	5342	0.551642	0.615911	0.769297	comp127276_c0_seq1; comp123086_c0_seq1; comp120861_c0_seq1
ko04713	Circadian entrainment	1	124	81	5342	0.565463	0.628293	0.53186	comp125266_c0_seq6
ko03015	mRNA surveillance pathway	1	124	84	5342	0.585402	0.647319	0.512865	comp125339_c1_seq1
ko04072	Phospholipase D signaling pathway	1	124	86	5342	0.598319	0.655302	0.500938	comp132702_c0_seq3
ko00564	Glycerophospholipid metabolism	1	124	86	5342	0.598319	0.655302	0.500938	comp104919_c0_seq1
ko04921	Oxytocin signaling pathway	2	124	135	5342	0.612003	0.667112	0.638232	comp121016_c0_seq5; comp125266_c0_seq6
ko04915	Estrogen signaling pathway	1	124	90	5342	0.62325	0.676168	0.478674	comp125266_c0_seq6
ko04013	MAPK signaling pathway - fly	2	124	145	5342	0.660401	0.709658	0.594216	comp117864_c0_seq1; comp128490_c2_seq2
ko04932	Non-alcoholic fatty liver disease (NAFLD)	2	124	145	5342	0.660401	0.709658	0.594216	comp119876_c0_seq1; comp132702_c0_seq3
ko04260	Cardiac muscle contraction	1	124	98	5342	0.669528	0.709658	0.439598	comp124626_c0_seq13
ko00240	Pyrimidine metabolism	1	124	98	5342	0.669528	0.709658	0.439598	comp125653_c0_seq7
ko03040	Spliceosome	2	124	147	5342	0.669547	0.709658	0.586131	comp119852_c0_seq5; comp125339_c1_seq1
ko05231	Choline metabolism in cancer	1	124	100	5342	0.680362	0.717813	0.430806	comp113195_c0_seq1
ko05414	Dilated cardiomyopathy (DCM)	1	124	101	5342	0.685671	0.720111	0.426541	comp121016_c0_seq5
ko05410	Hypertrophic cardiomyopathy (HCM)	1	124	104	5342	0.701168	0.733039	0.414237	comp121016_c0_seq5
ko04919	Thyroid hormone signaling pathway	1	124	107	5342	0.716032	0.74249	0.402623	comp121016_c0_seq5
ko04024	cAMP signaling pathway	2	124	158	5342	0.716664	0.74249	0.545325	comp125266_c0_seq6; comp123086_c0_seq1
ko05203	Viral carcinogenesis	1	124	110	5342	0.730277	0.7532	0.391642	comp119876_c0_seq1
ko05012	Parkinson's disease	2	124	164	5342	0.740116	0.75994	0.525374	comp123741_c0_seq2; comp127915_c0_seq3
ko04214	Apoptosis - fly	1	124	113	5342	0.743917	0.760448	0.381245	comp117864_c0_seq1
ko04144	Endocytosis	2	124	178	5342	0.788901	0.802864	0.484052	comp39182_c0_seq1; comp119876_c0_seq1
ko05016	Huntington's disease	3	124	234	5342	0.800068	0.810642	0.552316	comp105620_c0_seq1; comp123741_c0_seq2; comp127915_c0_seq3
ko05169	Epstein-Barr virus infection	1	124	138	5342	0.836278	0.843614	0.312179	comp117864_c0_seq1
ko05010	Alzheimer's disease	2	124	200	5342	0.85018	0.853892	0.430806	comp125266_c0_seq6; comp127915_c0_seq3
ko00190	Oxidative phosphorylation	1	124	153	5342	0.87619	0.87619	0.281573	comp127915_c0_seq3
